# Supplementary material
Source: publisher figshare collection journal article supplement (https://acs.figshare.com/ndownloader/files/3735664)
Supplement: Supplementary file 1 [file 3735664]

 
data_E258 
  
_audit_creation_method            SHELXL-2013 
_chemical_name_systematic 
; 
 ? 
; 
_chemical_name_common             ? 
_chemical_melting_point           ? 
_chemical_formula_moiety          ? 
_chemical_formula_sum 
 'C21 H13 Cl4 N2 O4 Re' 
_chemical_formula_weight          685.33 
  
loop_ 
 _atom_type_symbol 
 _atom_type_description 
 _atom_type_scat_dispersion_real 
 _atom_type_scat_dispersion_imag 
 _atom_type_scat_source 
 'C'  'C'   0.0033   0.0016 
 'International Tables Vol C Tables 4.2.6.8 and 6.1.1.4' 
 'H'  'H'   0.0000   0.0000 
 'International Tables Vol C Tables 4.2.6.8 and 6.1.1.4' 
 'N'  'N'   0.0061   0.0033 
 'International Tables Vol C Tables 4.2.6.8 and 6.1.1.4' 
 'O'  'O'   0.0106   0.0060 
 'International Tables Vol C Tables 4.2.6.8 and 6.1.1.4' 
 'Cl'  'Cl'   0.1484   0.1585 
 'International Tables Vol C Tables 4.2.6.8 and 6.1.1.4' 
 'Re'  'Re'  -1.0185   7.2310 
 'International Tables Vol C Tables 4.2.6.8 and 6.1.1.4' 
  
_space_group_crystal_system       monoclinic 
_space_group_IT_number            14 
_space_group_name_H-M_alt         'P 21/n' 
_space_group_name_Hall            '-P 2yn' 
  
_shelx_space_group_comment 
; 
The symmetry employed for this shelxl refinement is uniquely defined 
by the following loop, which should always be used as a source of 
symmetry information in preference to the above space-group names. 
They are only intended as comments. 
; 
  
loop_ 
 _space_group_symop_operation_xyz 
 'x, y, z' 
 '-x+1/2, y+1/2, -z+1/2' 
 '-x, -y, -z' 
 'x-1/2, -y-1/2, z-1/2' 
  
_cell_length_a                    8.0530(4) 
_cell_length_b                    22.6109(11) 
_cell_length_c                    12.7831(7) 
_cell_angle_alpha                 90 
_cell_angle_beta                  95.8910(17) 
_cell_angle_gamma                 90 
_cell_volume                      2315.3(2) 
_cell_formula_units_Z             4 
_cell_measurement_temperature     100(2) 
_cell_measurement_reflns_used     9766 
_cell_measurement_theta_min       2.70 
_cell_measurement_theta_max       28.34 
  
_exptl_crystal_description        Block 
_exptl_crystal_colour             Orange 
_exptl_crystal_density_meas       'Not Measured' 
_exptl_crystal_density_method     'Not Measured' 
_exptl_crystal_density_diffrn     1.966 
_exptl_crystal_F_000              1312 
_exptl_transmission_factor_min    ? 
_exptl_transmission_factor_max    ? 
_exptl_crystal_size_max           0.320 
_exptl_crystal_size_mid           0.230 
_exptl_crystal_size_min           0.180 
_exptl_absorpt_coefficient_mu     5.741 
_shelx_estimated_absorpt_T_min    0.261 
_shelx_estimated_absorpt_T_max    0.425 
_exptl_absorpt_correction_type    Multi-scan 
_exptl_absorpt_correction_T_min   0.5605 
_exptl_absorpt_correction_T_max   0.7457 
_exptl_absorpt_process_details    'Sadabs, (Sheldrick 2012)'
  
_exptl_special_details 
; 
 ? 
; 
  
_diffrn_ambient_temperature       100(2) 
_diffrn_radiation_wavelength      0.71073 
_diffrn_radiation_type            MoK\a 
_diffrn_source                    'Sealed Microfocusing Source' 
_diffrn_measurement_device_type   'Bruker D8 Venture' 
_diffrn_measurement_method        '\f and \w scans' 
_diffrn_detector_area_resol_mean  ? 
_diffrn_reflns_number             54236 
_diffrn_reflns_av_unetI/netI      0.0094 
_diffrn_reflns_av_R_equivalents   0.0189 
_diffrn_reflns_limit_h_min        -10 
_diffrn_reflns_limit_h_max        10 
_diffrn_reflns_limit_k_min        -30 
_diffrn_reflns_limit_k_max        29 
_diffrn_reflns_limit_l_min        -17 
_diffrn_reflns_limit_l_max        16 
_diffrn_reflns_theta_min          2.698 
_diffrn_reflns_theta_max          28.281 
_diffrn_reflns_theta_full         25.242 
_diffrn_measured_fraction_theta_max   0.999 
_diffrn_measured_fraction_theta_full  0.999 
_diffrn_reflns_Laue_measured_fraction_max    0.999 
_diffrn_reflns_Laue_measured_fraction_full   0.999 
_diffrn_reflns_point_group_measured_fraction_max   0.999 
_diffrn_reflns_point_group_measured_fraction_full  0.999 
_reflns_number_total              5738 
_reflns_number_gt                 5602 
_reflns_threshold_expression      'I > 2\s(I)' 
_reflns_Friedel_coverage          0.000 
_reflns_Friedel_fraction_max      . 
_reflns_Friedel_fraction_full     . 
  
_reflns_special_details 
; 
 Reflections were merged by SHELXL according to the crystal 
 class for the calculation of statistics and refinement. 
  
 _reflns_Friedel_fraction is defined as the number of unique 
 Friedel pairs measured divided by the number that would be 
 possible theoretically, ignoring centric projections and 
 systematic absences. 
; 
  
_computing.bruker_data_scaling 'SADABS V2012/1 (Bruker AXS Inc.)'
_computing.cell_refinement 	'APEX2 v2013.6--2 (Bruker AXS)'
_computing.data_collection 	'APEX2 (Bruker AXS)'
_computing.data_reduction 	'SAINT V8.32B (Bruker AXS Inc., 2013)'
_computing.molecular_graphics 	'Bruker SHELXTL'
_computing.publication_material 'Bruker SHELXTL'
_computing.structure_refinement 'SHELXL--2013 (Sheldrick 2013)'
_computing.structure_solution 	'SHELXS--97 (Sheldrick 2008)'
  
_refine_special_details 
; 
 ? 
; 
_refine_ls_structure_factor_coef  Fsqd 
_refine_ls_matrix_type            full 
_refine_ls_weighting_scheme       calc 
_refine_ls_weighting_details 
'w=1/[\s^2^(Fo^2^)+(0.0102P)^2^+2.0421P] where P=(Fo^2^+2Fc^2^)/3' 
_atom_sites_solution_primary      ? 
_atom_sites_solution_secondary    ? 
_atom_sites_solution_hydrogens    geom 
_refine_ls_hydrogen_treatment     constr 
_refine_ls_extinction_method      none 
_refine_ls_extinction_coef        . 
_refine_ls_number_reflns          5738 
_refine_ls_number_parameters      291 
_refine_ls_number_restraints      0 
_refine_ls_R_factor_all           0.0145 
_refine_ls_R_factor_gt            0.0139 
_refine_ls_wR_factor_ref          0.0310 
_refine_ls_wR_factor_gt           0.0308 
_refine_ls_goodness_of_fit_ref    1.207 
_refine_ls_restrained_S_all       1.207 
_refine_ls_shift/su_max           0.003 
_refine_ls_shift/su_mean          0.000 
  
loop_ 
 _atom_site_label 
 _atom_site_type_symbol 
 _atom_site_fract_x 
 _atom_site_fract_y 
 _atom_site_fract_z 
 _atom_site_U_iso_or_equiv 
 _atom_site_adp_type 
 _atom_site_occupancy 
 _atom_site_site_symmetry_order 
 _atom_site_calc_flag 
 _atom_site_refinement_flags_posn 
 _atom_site_refinement_flags_adp 
 _atom_site_refinement_flags_occupancy 
 _atom_site_disorder_assembly 
 _atom_site_disorder_group 
Re1 Re -0.02428(2) 0.89571(2) 0.80371(2) 0.01060(2) Uani 1 1 d . . . . . 
Cl1 Cl 0.47896(5) 0.93424(2) 0.83748(4) 0.01896(8) Uani 1 1 d . . . . . 
Cl2 Cl -0.06211(6) 1.05939(2) 0.69040(4) 0.02798(10) Uani 1 1 d . . . . . 
Cl3 Cl 0.36220(6) 0.76901(2) 0.84047(4) 0.02388(9) Uani 1 1 d . . . . . 
Cl4 Cl -0.26574(6) 0.76496(2) 0.64781(4) 0.02657(10) Uani 1 1 d . . . . . 
O1 O -0.29543(18) 0.91938(6) 0.61314(11) 0.0253(3) Uani 1 1 d . . . . . 
O2 O -0.15505(16) 1.00108(6) 0.92511(11) 0.0223(3) Uani 1 1 d . . . . . 
O3 O 0.21883(18) 0.87044(6) 1.00635(10) 0.0233(3) Uani 1 1 d . . . . . 
O4 O -0.28479(17) 0.82053(6) 0.90304(11) 0.0218(3) Uani 1 1 d . . . . . 
N1 N 0.14638(17) 0.94880(6) 0.72276(11) 0.0122(3) Uani 1 1 d . . . . . 
N2 N 0.06503(18) 0.82274(6) 0.71452(11) 0.0125(3) Uani 1 1 d . . . . . 
C1 C 0.2108(2) 1.00062(7) 0.77418(13) 0.0131(3) Uani 1 1 d . . . . . 
C2 C 0.3661(2) 0.99987(7) 0.83373(13) 0.0140(3) Uani 1 1 d . . . . . 
C3 C 0.4328(2) 1.04874(8) 0.88737(14) 0.0192(4) Uani 1 1 d . . . . . 
H3 H 0.5397 1.0468 0.9263 0.023 Uiso 1 1 calc R U . . . 
C4 C 0.3413(3) 1.10067(8) 0.88353(15) 0.0224(4) Uani 1 1 d . . . . . 
H4 H 0.3850 1.1344 0.9212 0.027 Uiso 1 1 calc R U . . . 
C5 C 0.1869(3) 1.10390(8) 0.82538(16) 0.0217(4) Uani 1 1 d . . . . . 
H5 H 0.1242 1.1396 0.8230 0.026 Uiso 1 1 calc R U . . . 
C6 C 0.1249(2) 1.05428(8) 0.77062(14) 0.0174(3) Uani 1 1 d . . . . . 
C7 C 0.1979(2) 0.93613(7) 0.62983(13) 0.0150(3) Uani 1 1 d . . . . . 
C8 C 0.1738(2) 0.88135(8) 0.57977(14) 0.0182(3) Uani 1 1 d . . . . . 
H8 H 0.1880 0.8806 0.5069 0.022 Uiso 1 1 calc R U . . . 
C9 C 0.1314(2) 0.82750(7) 0.62406(13) 0.0151(3) Uani 1 1 d . . . . . 
C10 C 0.2935(3) 0.98235(8) 0.57518(14) 0.0212(4) Uani 1 1 d . . . . . 
H10A H 0.2308 1.0196 0.5714 0.032 Uiso 1 1 calc R U . . . 
H10B H 0.3087 0.9689 0.5039 0.032 Uiso 1 1 calc R U . . . 
H10C H 0.4028 0.9886 0.6148 0.032 Uiso 1 1 calc R U . . . 
C11 C 0.1689(3) 0.77229(8) 0.56470(14) 0.0218(4) Uani 1 1 d . . . . . 
H11A H 0.2619 0.7511 0.6035 0.033 Uiso 1 1 calc R U . . . 
H11B H 0.1993 0.7831 0.4949 0.033 Uiso 1 1 calc R U . . . 
H11C H 0.0700 0.7468 0.5572 0.033 Uiso 1 1 calc R U . . . 
C12 C 0.0420(2) 0.76492(7) 0.75517(13) 0.0149(3) Uani 1 1 d . . . . . 
C13 C 0.1666(2) 0.73674(8) 0.82084(14) 0.0181(3) Uani 1 1 d . . . . . 
C14 C 0.1404(3) 0.68283(8) 0.86887(15) 0.0251(4) Uani 1 1 d . . . . . 
H14 H 0.2266 0.6652 0.9148 0.030 Uiso 1 1 calc R U . . . 
C15 C -0.0131(3) 0.65527(9) 0.84876(18) 0.0308(5) Uani 1 1 d . . . . . 
H15 H -0.0328 0.6187 0.8819 0.037 Uiso 1 1 calc R U . . . 
C16 C -0.1381(3) 0.68058(8) 0.78090(17) 0.0273(4) Uani 1 1 d . . . . . 
H16 H -0.2425 0.6611 0.7661 0.033 Uiso 1 1 calc R U . . . 
C17 C -0.1094(2) 0.73474(8) 0.73453(15) 0.0201(4) Uani 1 1 d . . . . . 
C18 C -0.1951(2) 0.91089(7) 0.67954(14) 0.0158(3) Uani 1 1 d . . . . . 
C19 C -0.1045(2) 0.96247(8) 0.87931(14) 0.0155(3) Uani 1 1 d . . . . . 
C20 C 0.1388(2) 0.87938(7) 0.92975(14) 0.0153(3) Uani 1 1 d . . . . . 
C21 C -0.1846(2) 0.84785(7) 0.86660(13) 0.0150(3) Uani 1 1 d . . . . . 
  
loop_ 
 _atom_site_aniso_label 
 _atom_site_aniso_U_11 
 _atom_site_aniso_U_22 
 _atom_site_aniso_U_33 
 _atom_site_aniso_U_23 
 _atom_site_aniso_U_13 
 _atom_site_aniso_U_12 
Re1 0.01164(3) 0.00884(3) 0.01144(3) -0.00033(2) 0.00180(2) -0.00046(2) 
Cl1 0.01396(18) 0.01750(19) 0.0250(2) -0.00148(16) -0.00016(15) 0.00240(15) 
Cl2 0.0272(2) 0.0180(2) 0.0363(3) 0.00245(18) -0.00823(19) 0.00836(18) 
Cl3 0.0204(2) 0.0218(2) 0.0285(2) 0.00122(17) -0.00222(17) 0.00294(17) 
Cl4 0.0220(2) 0.0236(2) 0.0330(2) -0.00630(18) -0.00261(18) -0.00579(17) 
O1 0.0238(7) 0.0281(7) 0.0226(7) 0.0058(6) -0.0044(6) -0.0014(6) 
O2 0.0193(6) 0.0192(6) 0.0284(7) -0.0097(5) 0.0025(5) 0.0015(5) 
O3 0.0282(7) 0.0219(7) 0.0184(7) 0.0009(5) -0.0049(5) 0.0008(6) 
O4 0.0233(7) 0.0181(6) 0.0256(7) 0.0032(5) 0.0100(5) -0.0038(5) 
N1 0.0136(7) 0.0089(6) 0.0142(7) 0.0001(5) 0.0014(5) -0.0015(5) 
N2 0.0159(7) 0.0086(6) 0.0133(6) -0.0003(5) 0.0027(5) -0.0006(5) 
C1 0.0158(8) 0.0104(7) 0.0137(8) 0.0008(6) 0.0040(6) -0.0023(6) 
C2 0.0142(8) 0.0134(7) 0.0151(8) 0.0002(6) 0.0045(6) -0.0006(6) 
C3 0.0196(9) 0.0195(8) 0.0185(8) -0.0025(7) 0.0023(7) -0.0065(7) 
C4 0.0322(10) 0.0133(8) 0.0227(9) -0.0048(7) 0.0078(8) -0.0078(7) 
C5 0.0305(10) 0.0093(8) 0.0263(10) -0.0004(7) 0.0076(8) 0.0004(7) 
C6 0.0185(8) 0.0132(8) 0.0205(9) 0.0024(6) 0.0018(7) 0.0005(6) 
C7 0.0178(8) 0.0129(7) 0.0141(8) 0.0028(6) 0.0010(6) -0.0003(6) 
C8 0.0284(10) 0.0159(8) 0.0107(8) -0.0003(6) 0.0035(7) -0.0030(7) 
C9 0.0183(8) 0.0135(8) 0.0135(8) -0.0029(6) 0.0016(6) -0.0013(6) 
C10 0.0317(10) 0.0161(8) 0.0170(8) 0.0020(7) 0.0085(7) -0.0045(7) 
C11 0.0341(11) 0.0148(8) 0.0176(8) -0.0052(7) 0.0082(8) -0.0011(7) 
C12 0.0206(8) 0.0096(7) 0.0156(8) -0.0019(6) 0.0067(6) -0.0009(6) 
C13 0.0229(9) 0.0130(8) 0.0191(8) -0.0009(6) 0.0055(7) 0.0011(7) 
C14 0.0379(11) 0.0167(9) 0.0219(9) 0.0049(7) 0.0087(8) 0.0061(8) 
C15 0.0481(13) 0.0130(8) 0.0349(11) 0.0048(8) 0.0214(10) -0.0012(8) 
C16 0.0314(11) 0.0159(9) 0.0373(11) -0.0036(8) 0.0161(9) -0.0084(8) 
C17 0.0220(9) 0.0154(8) 0.0238(9) -0.0038(7) 0.0063(7) -0.0021(7) 
C18 0.0166(8) 0.0130(7) 0.0183(8) 0.0007(6) 0.0034(7) -0.0023(6) 
C19 0.0125(8) 0.0156(8) 0.0182(8) -0.0006(6) 0.0006(6) -0.0021(6) 
C20 0.0174(8) 0.0122(7) 0.0168(8) -0.0014(6) 0.0041(6) -0.0013(6) 
C21 0.0183(8) 0.0121(7) 0.0144(8) -0.0015(6) 0.0012(6) 0.0016(6) 
  
_geom_special_details 
; 
 All esds (except the esd in the dihedral angle between two l.s. planes) 
 are estimated using the full covariance matrix.  The cell esds are taken 
 into account individually in the estimation of esds in distances, angles 
 and torsion angles; correlations between esds in cell parameters are only 
 used when they are defined by crystal symmetry.  An approximate (isotropic) 
 treatment of cell esds is used for estimating esds involving l.s. planes. 
; 
  
loop_ 
 _geom_bond_atom_site_label_1 
 _geom_bond_atom_site_label_2 
 _geom_bond_distance 
 _geom_bond_site_symmetry_2 
 _geom_bond_publ_flag 
Re1 C21 1.9230(17) . ? 
Re1 C19 1.9384(17) . ? 
Re1 C20 2.0055(18) . ? 
Re1 C18 2.0203(18) . ? 
Re1 N1 2.1662(14) . ? 
Re1 N2 2.1699(13) . ? 
Cl1 C2 1.7383(17) . ? 
Cl2 C6 1.7368(19) . ? 
Cl3 C13 1.7310(19) . ? 
Cl4 C17 1.731(2) . ? 
O1 C18 1.127(2) . ? 
O2 C19 1.149(2) . ? 
O3 C20 1.134(2) . ? 
O4 C21 1.152(2) . ? 
N1 C7 1.329(2) . ? 
N1 C1 1.416(2) . ? 
N2 C9 1.327(2) . ? 
N2 C12 1.426(2) . ? 
C1 C6 1.395(2) . ? 
C1 C2 1.396(2) . ? 
C2 C3 1.380(2) . ? 
C3 C4 1.384(3) . ? 
C3 H3 0.9500 . ? 
C4 C5 1.384(3) . ? 
C4 H4 0.9500 . ? 
C5 C6 1.388(3) . ? 
C5 H5 0.9500 . ? 
C7 C8 1.398(2) . ? 
C7 C10 1.511(2) . ? 
C8 C9 1.400(2) . ? 
C8 H8 0.9500 . ? 
C9 C11 1.507(2) . ? 
C10 H10A 0.9800 . ? 
C10 H10B 0.9800 . ? 
C10 H10C 0.9800 . ? 
C11 H11A 0.9800 . ? 
C11 H11B 0.9800 . ? 
C11 H11C 0.9800 . ? 
C12 C13 1.394(3) . ? 
C12 C17 1.399(3) . ? 
C13 C14 1.391(2) . ? 
C14 C15 1.385(3) . ? 
C14 H14 0.9500 . ? 
C15 C16 1.383(3) . ? 
C15 H15 0.9500 . ? 
C16 C17 1.390(3) . ? 
C16 H16 0.9500 . ? 
  
loop_ 
 _geom_angle_atom_site_label_1 
 _geom_angle_atom_site_label_2 
 _geom_angle_atom_site_label_3 
 _geom_angle 
 _geom_angle_site_symmetry_1 
 _geom_angle_site_symmetry_3 
 _geom_angle_publ_flag 
C21 Re1 C19 87.56(7) . . ? 
C21 Re1 C20 88.44(7) . . ? 
C19 Re1 C20 88.11(7) . . ? 
C21 Re1 C18 89.53(7) . . ? 
C19 Re1 C18 91.41(7) . . ? 
C20 Re1 C18 177.93(7) . . ? 
C21 Re1 N1 176.13(6) . . ? 
C19 Re1 N1 93.83(6) . . ? 
C20 Re1 N1 95.21(6) . . ? 
C18 Re1 N1 86.83(6) . . ? 
C21 Re1 N2 93.71(6) . . ? 
C19 Re1 N2 178.14(6) . . ? 
C20 Re1 N2 93.27(6) . . ? 
C18 Re1 N2 87.25(6) . . ? 
N1 Re1 N2 84.82(5) . . ? 
C7 N1 C1 117.41(14) . . ? 
C7 N1 Re1 125.38(11) . . ? 
C1 N1 Re1 117.20(10) . . ? 
C9 N2 C12 118.10(14) . . ? 
C9 N2 Re1 125.52(11) . . ? 
C12 N2 Re1 116.31(10) . . ? 
C6 C1 C2 116.22(15) . . ? 
C6 C1 N1 123.22(16) . . ? 
C2 C1 N1 120.55(15) . . ? 
C3 C2 C1 122.85(16) . . ? 
C3 C2 Cl1 119.63(14) . . ? 
C1 C2 Cl1 117.52(13) . . ? 
C2 C3 C4 118.89(18) . . ? 
C2 C3 H3 120.6 . . ? 
C4 C3 H3 120.6 . . ? 
C5 C4 C3 120.64(17) . . ? 
C5 C4 H4 119.7 . . ? 
C3 C4 H4 119.7 . . ? 
C4 C5 C6 119.01(17) . . ? 
C4 C5 H5 120.5 . . ? 
C6 C5 H5 120.5 . . ? 
C5 C6 C1 122.37(17) . . ? 
C5 C6 Cl2 119.28(14) . . ? 
C1 C6 Cl2 118.30(14) . . ? 
N1 C7 C8 123.96(15) . . ? 
N1 C7 C10 118.99(15) . . ? 
C8 C7 C10 117.02(15) . . ? 
C7 C8 C9 127.84(16) . . ? 
C7 C8 H8 116.1 . . ? 
C9 C8 H8 116.1 . . ? 
N2 C9 C8 124.04(15) . . ? 
N2 C9 C11 119.39(15) . . ? 
C8 C9 C11 116.55(15) . . ? 
C7 C10 H10A 109.5 . . ? 
C7 C10 H10B 109.5 . . ? 
H10A C10 H10B 109.5 . . ? 
C7 C10 H10C 109.5 . . ? 
H10A C10 H10C 109.5 . . ? 
H10B C10 H10C 109.5 . . ? 
C9 C11 H11A 109.5 . . ? 
C9 C11 H11B 109.5 . . ? 
H11A C11 H11B 109.5 . . ? 
C9 C11 H11C 109.5 . . ? 
H11A C11 H11C 109.5 . . ? 
H11B C11 H11C 109.5 . . ? 
C13 C12 C17 116.74(16) . . ? 
C13 C12 N2 121.74(16) . . ? 
C17 C12 N2 121.47(16) . . ? 
C14 C13 C12 122.29(18) . . ? 
C14 C13 Cl3 118.83(15) . . ? 
C12 C13 Cl3 118.85(13) . . ? 
C15 C14 C13 119.03(19) . . ? 
C15 C14 H14 120.5 . . ? 
C13 C14 H14 120.5 . . ? 
C16 C15 C14 120.56(18) . . ? 
C16 C15 H15 119.7 . . ? 
C14 C15 H15 119.7 . . ? 
C15 C16 C17 119.33(19) . . ? 
C15 C16 H16 120.3 . . ? 
C17 C16 H16 120.3 . . ? 
C16 C17 C12 121.95(19) . . ? 
C16 C17 Cl4 118.64(16) . . ? 
C12 C17 Cl4 119.40(14) . . ? 
O1 C18 Re1 177.09(16) . . ? 
O2 C19 Re1 178.21(15) . . ? 
O3 C20 Re1 173.70(15) . . ? 
O4 C21 Re1 177.68(15) . . ? 
  
_refine_diff_density_max    0.716 
_refine_diff_density_min   -0.784 
_refine_diff_density_rms    0.069 
  
_shelxl_version_number 2013-4 
  
_shelx_res_file 
; 
TITL E258 in P2(1)/n 
CELL  0.71073   8.0530  22.6109  12.7831   90.000   95.891   90.000 
ZERR    4.00   0.00040   0.00110   0.00070   0.0000   0.0017   0.0000 
LATT 1 
SYMM 1/2-X, 1/2+Y, 1/2-Z 
SFAC C  H  N  O  Cl Re 
UNIT 84 52 8 16 16 4 
OMIT 0 2 1 
L.S. 10 
ACTA 
BOND 
BOND $H 
FMAP 2 
PLAN 20 
SHEL 999 0.75 
TEMP -173.150 
SIZE 0.32 0.23 0.18 
WGHT    0.010200    2.042100 
FVAR       0.07084 
RE1   6   -0.024279    0.895715    0.803712    11.00000    0.01164    0.00884 = 
         0.01144   -0.00033    0.00180   -0.00046 
CL1   5    0.478963    0.934238    0.837477    11.00000    0.01396    0.01750 = 
         0.02498   -0.00148   -0.00016    0.00240 
CL2   5   -0.062112    1.059387    0.690396    11.00000    0.02723    0.01804 = 
         0.03629    0.00245   -0.00823    0.00836 
CL3   5    0.362203    0.769005    0.840467    11.00000    0.02038    0.02177 = 
         0.02851    0.00122   -0.00222    0.00294 
CL4   5   -0.265740    0.764964    0.647805    11.00000    0.02196    0.02359 = 
         0.03305   -0.00630   -0.00261   -0.00579 
O1    4   -0.295429    0.919382    0.613144    11.00000    0.02381    0.02809 = 
         0.02259    0.00576   -0.00439   -0.00138 
O2    4   -0.155055    1.001082    0.925114    11.00000    0.01931    0.01915 = 
         0.02837   -0.00975    0.00246    0.00153 
O3    4    0.218833    0.870437    1.006346    11.00000    0.02817    0.02188 = 
         0.01845    0.00088   -0.00488    0.00079 
O4    4   -0.284786    0.820534    0.903036    11.00000    0.02330    0.01807 = 
         0.02563    0.00316    0.00997   -0.00379 
N1    3    0.146377    0.948803    0.722761    11.00000    0.01359    0.00893 = 
         0.01417    0.00011    0.00139   -0.00146 
N2    3    0.065033    0.822735    0.714516    11.00000    0.01593    0.00860 = 
         0.01327   -0.00028    0.00270   -0.00062 
C1    1    0.210794    1.000621    0.774185    11.00000    0.01582    0.01038 = 
         0.01372    0.00075    0.00400   -0.00232 
C2    1    0.366112    0.999872    0.833729    11.00000    0.01415    0.01339 = 
         0.01514    0.00021    0.00450   -0.00059 
C3    1    0.432788    1.048744    0.887368    11.00000    0.01961    0.01945 = 
         0.01845   -0.00248    0.00228   -0.00651 
AFIX  43 
H3    2    0.539682    1.046788    0.926281    11.00000   -1.20000 
AFIX   0 
C4    1    0.341309    1.100669    0.883528    11.00000    0.03217    0.01331 = 
         0.02266   -0.00475    0.00781   -0.00782 
AFIX  43 
H4    2    0.384974    1.134409    0.921174    11.00000   -1.20000 
AFIX   0 
C5    1    0.186871    1.103904    0.825383    11.00000    0.03045    0.00931 = 
         0.02630   -0.00038    0.00757    0.00041 
AFIX  43 
H5    2    0.124192    1.139559    0.822982    11.00000   -1.20000 
AFIX   0 
C6    1    0.124914    1.054280    0.770625    11.00000    0.01845    0.01324 = 
         0.02049    0.00235    0.00177    0.00052 
C7    1    0.197886    0.936131    0.629828    11.00000    0.01775    0.01291 = 
         0.01413    0.00279    0.00100   -0.00034 
C8    1    0.173841    0.881353    0.579771    11.00000    0.02837    0.01587 = 
         0.01067   -0.00030    0.00352   -0.00302 
AFIX  43 
H8    2    0.187995    0.880596    0.506913    11.00000   -1.20000 
AFIX   0 
C9    1    0.131436    0.827503    0.624059    11.00000    0.01829    0.01347 = 
         0.01351   -0.00291    0.00163   -0.00133 
C10   1    0.293455    0.982353    0.575184    11.00000    0.03166    0.01613 = 
         0.01702    0.00204    0.00851   -0.00454 
AFIX 137 
H10A  2    0.230841    1.019588    0.571373    11.00000   -1.50000 
H10B  2    0.308690    0.968898    0.503921    11.00000   -1.50000 
H10C  2    0.402821    0.988552    0.614816    11.00000   -1.50000 
AFIX   0 
C11   1    0.168926    0.772295    0.564703    11.00000    0.03406    0.01476 = 
         0.01763   -0.00518    0.00824   -0.00110 
AFIX 137 
H11A  2    0.261909    0.751064    0.603456    11.00000   -1.50000 
H11B  2    0.199284    0.783104    0.494903    11.00000   -1.50000 
H11C  2    0.069959    0.746824    0.557159    11.00000   -1.50000 
AFIX   0 
C12   1    0.042022    0.764920    0.755170    11.00000    0.02058    0.00960 = 
         0.01561   -0.00190    0.00670   -0.00088 
C13   1    0.166553    0.736741    0.820835    11.00000    0.02293    0.01305 = 
         0.01915   -0.00086    0.00552    0.00106 
C14   1    0.140392    0.682828    0.868869    11.00000    0.03786    0.01673 = 
         0.02188    0.00486    0.00867    0.00611 
AFIX  43 
H14   2    0.226587    0.665162    0.914803    11.00000   -1.20000 
AFIX   0 
C15   1   -0.013138    0.655271    0.848764    11.00000    0.04812    0.01304 = 
         0.03490    0.00477    0.02141   -0.00124 
AFIX  43 
H15   2   -0.032812    0.618676    0.881858    11.00000   -1.20000 
AFIX   0 
C16   1   -0.138088    0.680581    0.780902    11.00000    0.03139    0.01591 = 
         0.03725   -0.00361    0.01611   -0.00840 
AFIX  43 
H16   2   -0.242453    0.661148    0.766135    11.00000   -1.20000 
AFIX   0 
C17   1   -0.109405    0.734736    0.734531    11.00000    0.02196    0.01541 = 
         0.02379   -0.00384    0.00630   -0.00212 
C18   1   -0.195114    0.910893    0.679539    11.00000    0.01658    0.01300 = 
         0.01827    0.00074    0.00337   -0.00232 
C19   1   -0.104478    0.962470    0.879307    11.00000    0.01249    0.01560 = 
         0.01819   -0.00059    0.00059   -0.00210 
C20   1    0.138755    0.879376    0.929753    11.00000    0.01742    0.01218 = 
         0.01684   -0.00141    0.00406   -0.00127 
C21   1   -0.184625    0.847853    0.866603    11.00000    0.01830    0.01212 = 
         0.01437   -0.00155    0.00116    0.00158 
  
HKLF 4 
  
REM  E258 in P2(1)/n 
REM R1 =  0.0139 for    5602 Fo > 4sig(Fo)  and  0.0145 for all    5738 data 
REM    291 parameters refined using      0 restraints 
  
END 
  
WGHT      0.0102      2.0423 
  
REM Highest difference peak  0.716,  deepest hole -0.784,  1-sigma level  0.069 
Q1    1  -0.4740  0.8129  0.6978  11.00000  0.05    0.72 
Q2    1   0.0751  0.8971  0.5910  11.00000  0.05    0.67 
Q3    1   0.0758  0.8924  0.8202  11.00000  0.05    0.41 
Q4    1   0.2524  0.8745  0.5145  11.00000  0.05    0.38 
Q5    1   0.3979  1.0256  0.8524  11.00000  0.05    0.38 
Q6    1  -0.1242  0.8984  0.7968  11.00000  0.05    0.37 
Q7    1   0.1393  0.8019  0.5923  11.00000  0.05    0.37 
Q8    1   0.2323  0.9587  0.5989  11.00000  0.05    0.32 
Q9    1   0.4194  0.8162  0.9156  11.00000  0.05    0.31 
Q10   1   0.1422  0.7094  0.8366  11.00000  0.05    0.31 
Q11   1   0.1639  1.0773  0.8043  11.00000  0.05    0.30 
Q12   1   0.2799  1.0014  0.8157  11.00000  0.05    0.30 
Q13   1   0.1618  1.0244  0.7789  11.00000  0.05    0.29 
Q14   1   0.1783  0.9780  0.7456  11.00000  0.05    0.28 
Q15   1   0.1139  0.7424  0.7670  11.00000  0.05    0.27 
Q16   1  -0.1126  0.8966  0.7003  11.00000  0.05    0.27 
Q17   1   0.1445  0.8537  0.6004  11.00000  0.05    0.27 
Q18   1   0.4737  0.9389  0.7672  11.00000  0.05    0.26 
Q19   1   0.0513  0.8463  0.7418  11.00000  0.05    0.24 
Q20   1   0.3782  1.0682  0.8918  11.00000  0.05    0.24 
; 
_shelx_res_checksum   40835 
  
_shelx_hkl_file 
; 
  -1   0   0    0.05    0.02 
   1   0   0    0.03    0.01 
   1   0   0    0.00    0.01 
   2   0   0   77.44    1.65 
  -2   0   0   82.16    1.65 
   2   0   0   76.12    1.58 
   2   0   0   79.02    1.37 
  -2   0   0   75.73    1.57 
  -3   0   0    0.03    0.04 
   3   0   0    0.06    0.04 
   3   0   0    0.02    0.04 
   3   0   0    0.03    0.04 
  -3   0   0   -0.02    0.03 
   4   0   0  104.92    2.33 
  -4   0   0  105.11    2.21 
   4   0   0  107.66    2.23 
  -4   0   0  112.33    2.30 
   4   0   0  108.67    1.94 
   5   0   0    0.07    0.09 
   5   0   0    0.10    0.07 
  -5   0   0    0.06    0.06 
   5   0   0    0.08    0.09 
  -5   0   0    0.05    0.08 
   6   0   0  109.56    2.02 
   6   0   0  106.37    2.41 
   6   0   0  104.99    2.31 
  -6   0   0  105.36    2.27 
  -6   0   0  111.68    2.32 
   7   0   0   -0.03    0.12 
  -7   0   0    0.09    0.13 
   7   0   0   -0.08    0.13 
   7   0   0    0.30    0.16 
  -7   0   0    0.02    0.09 
   8   0   0   17.81    0.65 
   8   0   0   17.62    0.60 
  -8   0   0   17.72    0.50 
   9   0   0    0.32    0.21 
   9   0   0   -0.11    0.20 
   9   0   0    0.06    0.27 
  10   0   0    1.33    0.36 
  10   0   0    1.29    0.33 
  10   0   0    0.80    0.29 
  -1  -1   0  300.94    6.13 
  -1  -1   0  321.96    5.36 
  -1  -1   0  312.43    6.42 
   1   1   0  283.46    6.13 
  -1   1   0  303.15    6.17 
   1   1   0  325.55    6.43 
  -2  -1   0    0.25    0.04 
  -2  -1   0    0.39    0.04 
   2  -1   0    0.28    0.05 
  -2  -1   0    0.46    0.05 
   2  -1   0    0.24    0.04 
  -2   1   0    0.28    0.04 
   2   1   0    0.40    0.05 
   2   1   0    0.28    0.04 
  -3  -1   0   28.40    0.63 
   3  -1   0   27.64    0.64 
  -3  -1   0   26.96    0.62 
   3  -1   0   27.12    0.67 
   3   1   0   28.05    0.56 
   3   1   0   27.94    0.63 
  -3   1   0   28.60    0.65 
   3   1   0   26.99    0.65 
   4  -1   0   52.95    1.26 
   4  -1   0   54.61    1.21 
   4  -1   0   56.28    1.06 
  -4  -1   0   53.21    1.18 
  -4  -1   0   57.28    1.21 
   4   1   0   54.43    1.25 
   4   1   0   55.18    1.06 
   4   1   0   54.96    1.20 
  -4   1   0   53.64    1.19 
  -4   1   0   57.84    1.23 
   5  -1   0   38.20    0.81 
   5  -1   0   36.42    0.95 
  -5  -1   0   39.55    0.88 
  -5  -1   0   37.56    0.88 
   5  -1   0   37.27    0.91 
   5   1   0   38.10    0.94 
  -5   1   0   39.15    0.90 
  -5   1   0   37.32    0.89 
   5   1   0   38.26    0.91 
  -6  -1   0    4.40    0.20 
   6  -1   0    4.26    0.27 
   6  -1   0    4.06    0.29 
  -6  -1   0    4.38    0.24 
   6  -1   0    3.89    0.24 
  -6   1   0    4.40    0.25 
   6   1   0    4.21    0.28 
  -6   1   0    3.89    0.22 
   6   1   0    4.88    0.26 
   6   1   0    4.44    0.27 
   7  -1   0    6.05    0.32 
   7  -1   0    5.94    0.37 
   7  -1   0    5.75    0.35 
  -7  -1   0    5.80    0.24 
  -7  -1   0    5.52    0.30 
   7   1   0    5.76    0.33 
   7   1   0    5.36    0.36 
  -7   1   0    5.45    0.31 
   7   1   0    5.94    0.34 
  -7   1   0    5.97    0.27 
   8  -1   0   54.17    1.21 
   8  -1   0   54.51    1.38 
   8   1   0   53.88    1.37 
  -8   1   0   55.57    1.26 
   8   1   0   52.71    1.43 
   8   1   0   54.32    1.22 
   9  -1   0    0.16    0.25 
   9  -1   0    0.22    0.21 
  -9  -1   0    0.53    0.21 
   9  -1   0    0.05    0.22 
   9   1   0    0.15    0.22 
   9   1   0    0.11    0.20 
   9   1   0    0.17    0.26 
  -9   1   0   -0.15    0.13 
  10  -1   0   25.67    0.86 
  10  -1   0   27.92    1.00 
  10  -1   0   26.17    1.03 
  10   1   0   27.45    0.98 
  10   1   0   26.57    0.89 
  10   1   0   25.65    1.02 
  -1  -2   0    5.50    0.13 
   1  -2   0    5.30    0.14 
  -1  -2   0    5.60    0.13 
   1  -2   0    5.58    0.15 
   1   2   0    5.62    0.14 
  -1   2   0    5.65    0.16 
  -1   2   0    5.30    0.14 
   1   2   0    5.49    0.13 
   2  -2   0   95.14    1.92 
  -2  -2   0   91.85    1.65 
   2  -2   0   95.79    2.02 
   2  -2   0   93.21    1.83 
  -2  -2   0   93.22    1.90 
  -2  -2   0   98.75    1.98 
   2   2   0   96.74    1.99 
  -2   2   0   99.18    2.02 
   2   2   0   93.60    1.90 
  -3  -2   0    2.62    0.11 
   3  -2   0    2.35    0.14 
  -3  -2   0    2.55    0.11 
   3  -2   0    2.65    0.14 
  -3  -2   0    2.62    0.12 
   3   2   0    2.48    0.13 
   3   2   0    2.30    0.12 
   3   2   0    2.40    0.13 
  -3   2   0    2.67    0.13 
   4  -2   0   13.56    0.42 
   4  -2   0   14.28    0.36 
   4  -2   0   13.49    0.40 
  -4  -2   0   15.02    0.36 
  -4  -2   0   14.32    0.38 
   4   2   0   14.03    0.36 
  -4   2   0   13.73    0.40 
  -4   2   0   14.47    0.40 
   4   2   0   13.51    0.39 
   4   2   0   13.86    0.40 
   5  -2   0   57.49    1.13 
   5  -2   0   55.48    1.35 
  -5  -2   0   59.59    1.25 
   5  -2   0   56.11    1.29 
  -5  -2   0   55.50    1.25 
  -5   2   0   56.16    1.27 
  -5   2   0   59.59    1.30 
   5   2   0   56.79    1.28 
   5   2   0   57.18    1.33 
   6  -2   0    9.57    0.36 
   6  -2   0    8.77    0.40 
  -6  -2   0    9.53    0.29 
   6  -2   0    9.39    0.39 
  -6  -2   0    9.04    0.34 
   6   2   0    9.39    0.35 
   6   2   0    9.24    0.39 
  -6   2   0    9.38    0.36 
  -6   2   0    9.41    0.34 
   6   2   0    9.52    0.38 
   7  -2   0   69.12    1.62 
   7  -2   0   69.94    1.53 
  -7  -2   0   67.54    1.55 
   7  -2   0   66.84    1.68 
  -7  -2   0   69.77    1.49 
   7  -2   0   68.48    1.41 
   7   2   0   68.75    1.60 
   7   2   0   68.67    1.67 
  -7   2   0   72.98    1.57 
  -7   2   0   66.02    1.56 
   8  -2   0    2.16    0.25 
   8  -2   0    2.12    0.29 
   8  -2   0    3.02    0.34 
   8  -2   0    2.86    0.31 
  -8   2   0    2.02    0.25 
   8   2   0    2.67    0.29 
   8   2   0    2.62    0.33 
   8   2   0    2.36    0.30 
   9  -2   0   37.68    0.98 
  -9  -2   0   35.24    1.02 
   9  -2   0   36.75    1.16 
   9  -2   0   37.60    1.11 
   9   2   0   38.19    1.11 
   9   2   0   36.39    1.14 
   9   2   0   37.02    1.00 
  -9   2   0   38.41    0.92 
  10  -2   0    2.52    0.40 
  10  -2   0    2.64    0.45 
  10  -2   0    2.75    0.37 
  10   2   0    2.35    0.36 
  10   2   0    3.19    0.41 
  10   2   0    2.65    0.44 
   0  -3   0    0.08    0.02 
   0  -3   0    0.06    0.02 
   0   3   0    0.05    0.01 
   0   3   0    0.11    0.02 
   1  -3   0   34.12    0.71 
  -1  -3   0   35.03    0.73 
  -1  -3   0   33.96    0.68 
  -1  -3   0   35.17    0.70 
  -1  -3   0   35.23    0.61 
  -1  -3   0   35.35    0.72 
   1  -3   0   33.20    0.70 
   1   3   0   35.78    0.70 
   1   3   0   33.39    0.61 
   1   3   0   32.91    0.73 
   1   3   0   34.41    0.68 
  -1   3   0   34.75    0.76 
  -1   3   0   32.99    0.71 
  -2  -3   0    0.46    0.05 
  -2  -3   0    0.51    0.05 
  -2  -3   0    0.45    0.04 
   2  -3   0    0.31    0.05 
   2   3   0    0.48    0.05 
  -2   3   0    0.36    0.06 
   2   3   0    0.47    0.05 
   2   3   0    0.52    0.06 
  -2   3   0    0.36    0.05 
  -3  -3   0   74.26    1.33 
   3  -3   0   70.67    1.47 
   3  -3   0   74.69    1.64 
  -3  -3   0   72.00    1.52 
  -3  -3   0   78.56    1.57 
  -3   3   0   75.85    1.62 
   3   3   0   74.01    1.53 
  -3   3   0   74.07    1.54 
   3   3   0   74.20    1.35 
   3   3   0   74.50    1.60 
   4  -3   0   64.37    1.50 
   4  -3   0   64.66    1.43 
  -4  -3   0   68.68    1.41 
   4  -3   0   67.26    1.37 
  -4  -3   0   64.46    1.39 
  -4   3   0   69.45    1.48 
   4   3   0   65.92    1.47 
   4   3   0   65.85    1.41 
  -4   3   0   64.35    1.42 
   4   3   0   66.66    1.25 
  -5  -3   0   21.94    0.57 
   5  -3   0   22.27    0.62 
   5  -3   0   22.48    0.58 
   5  -3   0   23.04    0.54 
   5  -3   0   21.99    0.64 
  -5  -3   0   23.04    0.53 
  -5   3   0   22.70    0.60 
  -5   3   0   21.86    0.60 
   5   3   0   22.31    0.59 
   5   3   0   23.02    0.55 
   5   3   0   21.48    0.61 
  -6  -3   0  163.36    3.29 
   6  -3   0  158.04    2.85 
   6  -3   0  151.56    3.45 
   6  -3   0  161.36    3.14 
  -6  -3   0  153.35    3.22 
   6  -3   0  153.61    3.28 
   6   3   0  157.86    2.86 
   6   3   0  158.01    3.27 
  -6   3   0  165.37    3.38 
  -6   3   0  155.57    3.26 
   6   3   0  154.11    3.41 
  -7  -3   0    2.23    0.22 
   7  -3   0    2.48    0.24 
   7  -3   0    2.18    0.25 
   7  -3   0    2.33    0.30 
   7  -3   0    2.84    0.28 
   7   3   0    2.55    0.27 
  -7   3   0    2.56    0.23 
   7   3   0    2.20    0.29 
  -7   3   0    2.35    0.24 
   8  -3   0   72.46    1.74 
  -8  -3   0   69.28    1.64 
   8  -3   0   70.48    1.80 
   8  -3   0   72.50    1.51 
   8  -3   0   73.42    1.64 
   8   3   0   71.85    1.71 
  -8   3   0   75.78    1.66 
  -8   3   0   67.11    1.66 
   8   3   0   72.87    1.53 
   8   3   0   73.24    1.79 
   9  -3   0   -0.12    0.22 
   9  -3   0   -0.05    0.19 
   9  -3   0   -0.23    0.24 
  -9  -3   0    0.26    0.21 
   9   3   0    0.06    0.23 
  -9   3   0   -0.19    0.16 
   9   3   0    0.20    0.22 
   9   3   0    0.19    0.25 
  10  -3   0   72.38    1.95 
  10  -3   0   73.40    1.87 
  10  -3   0   69.40    1.62 
  10   3   0   69.13    1.92 
  10   3   0   72.31    1.85 
  10   3   0   73.08    1.67 
   0  -4   0   78.30    1.60 
   0  -4   0   76.58    1.61 
   0  -4   0   76.44    1.46 
   0  -4   0   76.44    1.30 
   0  -4   0   73.19    1.52 
   0   4   0   76.01    1.60 
   0   4   0   75.34    1.30 
   0   4   0   75.76    1.52 
   0   4   0   74.55    1.46 
   0   4   0   78.75    1.62 
  -1  -4   0    3.11    0.08 
  -1  -4   0    3.03    0.09 
   1  -4   0    3.03    0.09 
   1  -4   0    2.96    0.10 
   1  -4   0    2.98    0.10 
  -1  -4   0    2.99    0.07 
  -1  -4   0    3.01    0.09 
  -1  -4   0    2.97    0.09 
  -1   4   0    2.89    0.12 
   1   4   0    2.94    0.10 
   1   4   0    3.14    0.11 
   1   4   0    2.99    0.07 
   1   4   0    3.22    0.09 
   1   4   0    3.16    0.09 
   1   4   0    3.03    0.10 
  -1   4   0    3.00    0.10 
   2  -4   0  273.19    5.48 
  -2  -4   0  298.16    5.92 
  -2  -4   0  278.57    4.94 
  -2  -4   0  280.81    5.68 
  -2  -4   0  267.29    5.94 
  -2   4   0  276.67    5.80 
   2   4   0  284.89    5.70 
   2   4   0  284.33    5.06 
  -2   4   0  281.36    5.56 
   2   4   0  298.58    5.77 
   2   4   0  295.31    6.00 
  -2   4   0  290.61    6.05 
   3  -4   0   34.78    0.85 
   3  -4   0   34.52    0.76 
  -3  -4   0   34.91    0.68 
  -3  -4   0   37.02    0.77 
  -3  -4   0   35.74    0.76 
   3  -4   0   34.71    0.80 
   3   4   0   35.79    0.80 
   3   4   0   35.31    0.77 
  -3   4   0   33.87    0.79 
  -3   4   0   37.56    0.85 
  -4  -4   0  190.68    3.80 
   4  -4   0  188.50    3.55 
  -4  -4   0  181.47    3.19 
  -4  -4   0  180.74    3.66 
   4  -4   0  179.99    3.71 
   4  -4   0  174.40    3.91 
   4   4   0  184.84    3.22 
   4   4   0  184.53    3.68 
   4   4   0  184.21    3.86 
  -4   4   0  179.93    3.70 
  -4   4   0  192.50    3.89 
   5  -4   0    0.41    0.10 
   5  -4   0    0.36    0.09 
   5  -4   0    0.50    0.11 
  -5  -4   0    0.43    0.09 
  -5  -4   0    0.51    0.06 
   5  -4   0    0.57    0.13 
   5   4   0    0.52    0.10 
   5   4   0    0.45    0.11 
  -5   4   0    0.48    0.10 
   5   4   0    0.54    0.11 
   6  -4   0   64.49    1.41 
   6  -4   0   66.01    1.29 
  -6  -4   0   61.04    1.45 
   6  -4   0   63.35    1.49 
   6  -4   0   62.49    1.56 
   6   4   0   64.36    1.52 
   6   4   0   65.17    1.46 
   6   4   0   65.16    1.31 
  -6   4   0   63.10    1.46 
  -6   4   0   69.18    1.50 
   7  -4   0    6.86    0.34 
   7  -4   0    6.62    0.40 
  -7  -4   0    6.57    0.32 
   7  -4   0    7.06    0.35 
   7  -4   0    7.01    0.34 
  -7   4   0    6.94    0.33 
  -7   4   0    6.50    0.34 
   7   4   0    6.70    0.38 
   7   4   0    7.08    0.37 
   8  -4   0    0.14    0.15 
   8  -4   0    0.64    0.20 
   8  -4   0    0.26    0.18 
   8  -4   0    0.70    0.22 
  -8  -4   0    0.52    0.17 
   8   4   0    0.40    0.19 
   8   4   0    0.51    0.21 
   8   4   0    0.47    0.21 
  -8   4   0    0.39    0.19 
   9  -4   0   12.21    0.55 
   9  -4   0   11.56    0.60 
  -9  -4   0   10.87    0.53 
   9  -4   0   11.44    0.64 
   9   4   0   12.20    0.63 
   9   4   0   12.23    0.60 
   9   4   0   12.25    0.57 
  10  -4   0    3.77    0.44 
  10  -4   0    3.50    0.47 
  10  -4   0    4.07    0.41 
  10   4   0    3.69    0.45 
  10   4   0    3.03    0.44 
  10   4   0    3.79    0.44 
   0  -5   0    0.03    0.03 
   0  -5   0    0.05    0.02 
   0  -5   0    0.08    0.03 
   0   5   0    0.09    0.02 
   0   5   0    0.05    0.03 
   0   5   0    0.08    0.03 
   0   5   0    0.06    0.03 
   0   5   0    0.07    0.02 
  -1  -5   0  418.53    8.53 
   1  -5   0  403.68    8.21 
   1  -5   0  406.64    8.72 
  -1  -5   0  415.45    8.57 
   1  -5   0  412.75    7.90 
  -1  -5   0  431.81    7.94 
   1  -5   0  408.33    8.16 
  -1  -5   0  404.64    7.05 
  -1  -5   0  355.52    8.22 
  -1   5   0  404.45    8.20 
  -1   5   0  401.28    8.63 
   1   5   0  420.05    8.60 
  -1   5   0  396.32    7.86 
   1   5   0  420.79    7.14 
   1   5   0  419.82    7.97 
   1   5   0  414.85    8.57 
  -2  -5   0    0.68    0.05 
   2  -5   0    0.86    0.08 
   2  -5   0    0.67    0.09 
  -2  -5   0    0.64    0.05 
   2  -5   0    0.68    0.07 
  -2  -5   0    0.55    0.06 
   2  -5   0    0.58    0.06 
  -2   5   0    0.52    0.07 
  -2   5   0    0.60    0.07 
   2   5   0    0.56    0.06 
   2   5   0    0.66    0.05 
  -2   5   0    0.66    0.09 
   2   5   0    0.75    0.05 
   2   5   0    0.65    0.07 
  -3  -5   0   76.34    1.36 
  -3  -5   0   74.69    1.53 
  -3  -5   0   77.71    1.57 
   3  -5   0   72.97    1.51 
   3  -5   0   72.66    1.67 
   3   5   0   76.24    1.54 
   3   5   0   75.83    1.62 
  -3   5   0   77.22    1.67 
   3   5   0   74.09    1.37 
  -4  -5   0    2.21    0.13 
  -4  -5   0    2.00    0.13 
   4  -5   0    2.13    0.18 
   4  -5   0    2.28    0.16 
  -4   5   0    2.17    0.16 
   4   5   0    1.94    0.15 
   4   5   0    2.02    0.15 
  -4   5   0    1.88    0.16 
   4   5   0    2.15    0.14 
   5  -5   0   95.03    2.09 
  -5  -5   0   96.59    2.02 
   5  -5   0   93.37    2.20 
  -5   5   0   96.18    2.07 
   5   5   0   98.64    2.05 
   5   5   0   97.71    1.82 
  -5   5   0  104.78    2.17 
   5   5   0   97.21    2.14 
   6  -5   0   23.24    0.60 
   6  -5   0   23.64    0.64 
   6  -5   0   23.01    0.73 
   6  -5   0   22.88    0.69 
   6   5   0   24.01    0.68 
   6   5   0   22.79    0.61 
  -6   5   0   23.43    0.67 
   6   5   0   24.27    0.66 
  -6   5   0   25.42    0.68 
   7  -5   0   24.47    0.70 
  -7  -5   0   23.58    0.65 
   7  -5   0   23.65    0.75 
   7  -5   0   23.00    0.68 
   7  -5   0   22.58    0.76 
   7  -5   0   22.51    0.65 
   7   5   0   23.61    0.70 
   7   5   0   23.39    0.73 
  -7   5   0   23.27    0.71 
   7   5   0   22.93    0.66 
   8  -5   0    0.19    0.17 
  -8  -5   0   -0.03    0.15 
   8  -5   0    0.07    0.18 
   8  -5   0    0.20    0.16 
   8  -5   0   -0.02    0.16 
  -8   5   0   -0.03    0.16 
   8   5   0    0.11    0.18 
   8   5   0   -0.07    0.17 
  -8   5   0    0.04    0.17 
  -9  -5   0    4.88    0.41 
   9  -5   0    5.44    0.51 
   9  -5   0    5.14    0.46 
   9  -5   0    5.45    0.43 
   9   5   0    5.33    0.45 
  -9   5   0    4.16    0.38 
   9   5   0    5.46    0.47 
   9   5   0    5.40    0.51 
  10  -5   0    2.17    0.43 
  10  -5   0    2.99    0.37 
  10  -5   0    2.59    0.41 
  10   5   0    2.74    0.43 
  10   5   0    2.92    0.44 
  10   5   0    2.62    0.40 
   0  -6   0  480.26   10.11 
   0  -6   0  461.37    9.35 
   0  -6   0  484.83   10.03 
   0  -6   0  482.31    8.23 
   0  -6   0  468.78    9.19 
   0   6   0  483.16    8.22 
   0   6   0  476.26    9.37 
   0   6   0  482.14   10.11 
   0   6   0  471.98   10.02 
   0   6   0  474.06    9.24 
   1  -6   0    9.62    0.28 
  -1  -6   0    9.39    0.24 
   1  -6   0    9.23    0.23 
   1  -6   0    9.04    0.20 
   1  -6   0    9.06    0.26 
  -1  -6   0    9.22    0.22 
  -1  -6   0    8.94    0.20 
  -1  -6   0    9.11    0.23 
  -1  -6   0    9.27    0.24 
   1  -6   0    8.50    0.24 
   1   6   0    8.88    0.25 
  -1   6   0    9.08    0.24 
   1   6   0    9.23    0.21 
  -1   6   0    8.86    0.23 
   1   6   0    9.16    0.24 
   1   6   0    8.99    0.24 
  -2  -6   0  157.87    2.75 
  -2  -6   0  165.03    3.33 
   2  -6   0  161.80    3.06 
   2  -6   0  154.55    3.27 
   2  -6   0  153.92    3.18 
   2  -6   0  158.48    3.39 
  -2  -6   0  157.72    3.17 
   2   6   0  170.45    3.26 
   2   6   0  159.34    3.07 
   2   6   0  160.14    3.19 
  -2   6   0  162.17    3.06 
   2   6   0  157.20    2.76 
   2   6   0  162.26    3.35 
  -2   6   0  158.39    3.19 
  -2   6   0  161.11    3.38 
   3  -6   0  108.27    2.25 
   3  -6   0  109.76    2.16 
   3  -6   0  107.36    2.24 
   3  -6   0  108.08    2.39 
  -3  -6   0  107.88    2.19 
  -3  -6   0  111.85    1.94 
   3   6   0  106.79    1.95 
  -3   6   0  113.46    2.39 
  -3   6   0  110.58    2.16 
   3   6   0  110.77    2.20 
   3   6   0  112.47    2.33 
  -3   6   0  107.08    2.25 
   3   6   0  113.90    2.23 
   4  -6   0  119.17    2.34 
   4  -6   0  117.65    2.44 
  -4  -6   0  118.81    2.10 
  -4  -6   0  117.42    2.38 
   4  -6   0  113.64    2.59 
   4  -6   0  115.08    2.45 
  -4   6   0  114.90    2.44 
   4   6   0  119.71    2.13 
  -4   6   0  121.73    2.57 
   4   6   0  119.64    2.52 
   4   6   0  120.47    2.40 
   5  -6   0   32.25    0.83 
   5  -6   0   32.03    0.79 
   5  -6   0   30.42    0.87 
   5  -6   0   32.88    0.78 
  -5  -6   0   32.33    0.69 
  -5  -6   0   32.04    0.76 
  -5   6   0   31.71    0.81 
   5   6   0   32.55    0.78 
   5   6   0   33.34    0.73 
   5   6   0   32.22    0.81 
  -5   6   0   35.25    0.86 
   6  -6   0   28.64    0.85 
   6  -6   0   29.92    0.77 
   6  -6   0   29.89    0.76 
   6  -6   0   29.59    0.81 
  -6  -6   0   29.03    0.73 
   6  -6   0   28.80    0.69 
   6   6   0   29.11    0.76 
   6   6   0   29.48    0.80 
   6   6   0   28.86    0.72 
  -6   6   0   28.61    0.78 
   7  -6   0   90.32    2.08 
   7  -6   0   92.89    1.97 
   7  -6   0   86.75    2.18 
  -7  -6   0   89.98    1.98 
   7  -6   0   92.39    2.04 
   7   6   0   91.38    2.12 
   7   6   0   94.50    2.03 
   7   6   0   91.10    1.82 
  -7   6   0   96.71    2.10 
   8  -6   0    7.18    0.41 
   8  -6   0    6.26    0.38 
   8  -6   0    6.35    0.47 
  -8  -6   0    6.52    0.37 
   8  -6   0    6.22    0.41 
  -8   6   0    6.37    0.38 
   8   6   0    6.29    0.40 
   8   6   0    6.60    0.45 
   9  -6   0   43.51    1.08 
   9  -6   0   42.05    1.31 
   9  -6   0   43.05    1.24 
  -9  -6   0   40.19    1.12 
   9   6   0   44.24    1.13 
  -9   6   0   44.30    1.14 
   9   6   0   45.94    1.22 
   9   6   0   42.26    1.25 
  10  -6   0    0.59    0.31 
  10  -6   0    0.79    0.29 
  10  -6   0    0.58    0.35 
  10   6   0   -0.08    0.34 
  10   6   0    0.24    0.32 
  10   6   0    0.73    0.31 
   0  -7   0    0.21    0.05 
   0  -7   0    0.11    0.03 
   0  -7   0    0.21    0.03 
   0  -7   0    0.11    0.03 
   0   7   0    0.09    0.04 
   0   7   0    0.11    0.03 
   0   7   0    0.11    0.04 
   0   7   0    0.20    0.04 
   1  -7   0    0.16    0.04 
   1  -7   0    0.20    0.05 
  -1  -7   0    0.25    0.04 
  -1  -7   0    0.20    0.04 
   1  -7   0    0.20    0.06 
  -1  -7   0    0.25    0.04 
  -1  -7   0    0.38    0.05 
  -1  -7   0    0.18    0.04 
   1  -7   0    0.23    0.04 
   1  -7   0    0.20    0.03 
  -1   7   0    0.31    0.03 
  -1   7   0    0.25    0.05 
  -1   7   0    0.27    0.04 
   1   7   0    0.16    0.05 
   1   7   0    0.24    0.04 
  -1   7   0    0.22    0.06 
  -2  -7   0   47.09    0.95 
  -2  -7   0   48.24    0.98 
   2  -7   0   43.81    0.98 
   2  -7   0   44.90    0.96 
  -2  -7   0   45.23    0.85 
   2  -7   0   44.76    0.96 
   2  -7   0   45.10    1.07 
  -2  -7   0   47.80    0.99 
  -2  -7   0   45.87    0.93 
  -2   7   0   45.82    0.99 
   2   7   0   48.27    0.96 
   2   7   0   46.68    1.01 
   2   7   0   45.37    0.97 
   2   7   0   45.95    0.86 
  -2   7   0   46.73    1.07 
   3  -7   0   26.87    0.71 
   3  -7   0   27.09    0.63 
   3  -7   0   27.51    0.66 
  -3  -7   0   27.10    0.60 
  -3  -7   0   27.95    0.56 
   3  -7   0   26.95    0.63 
  -3   7   0   26.35    0.63 
   3   7   0   27.76    0.60 
   3   7   0   28.17    0.58 
   3   7   0   28.17    0.65 
  -3   7   0   27.59    0.66 
   3   7   0   28.31    0.60 
  -3   7   0   27.34    0.71 
   4  -7   0  117.94    2.35 
   4  -7   0  114.04    2.61 
   4  -7   0  115.93    2.46 
   4  -7   0  114.64    2.44 
  -4  -7   0  120.23    2.11 
  -4  -7   0  115.48    2.38 
   4   7   0  122.03    2.42 
   4   7   0  119.13    2.53 
   4   7   0  117.11    2.14 
   4   7   0  120.77    2.40 
  -4   7   0  116.56    2.45 
  -4   7   0  126.83    2.60 
   5  -7   0    3.44    0.23 
   5  -7   0    3.28    0.26 
  -5  -7   0    3.08    0.18 
   5  -7   0    3.05    0.20 
   5  -7   0    3.35    0.21 
  -5  -7   0    3.14    0.18 
   5   7   0    3.23    0.21 
   5   7   0    3.13    0.21 
   5   7   0    3.30    0.20 
  -5   7   0    3.83    0.24 
  -5   7   0    3.33    0.22 
   6  -7   0   70.14    1.56 
   6  -7   0   67.15    1.59 
   6  -7   0   72.26    1.52 
  -6  -7   0   67.71    1.50 
   6  -7   0   67.68    1.69 
  -6   7   0   66.85    1.56 
  -6   7   0   71.70    1.64 
   6   7   0   69.76    1.61 
   6   7   0   68.92    1.40 
   6   7   0   70.82    1.54 
  -7  -7   0    1.52    0.18 
   7  -7   0    1.84    0.22 
   7  -7   0    1.37    0.20 
   7  -7   0    1.63    0.21 
  -7   7   0    1.79    0.26 
   7   7   0    1.78    0.23 
   7   7   0    1.20    0.20 
   7   7   0    1.58    0.22 
   8  -7   0   79.76    2.04 
   8  -7   0   84.77    1.85 
   8  -7   0   79.21    1.94 
  -8  -7   0   79.77    1.82 
   8  -7   0   84.01    1.68 
   8   7   0   79.37    1.97 
   8   7   0   82.58    1.72 
   8   7   0   83.48    1.89 
  -8   7   0   85.26    1.93 
   9  -7   0    2.37    0.36 
  -9  -7   0    2.53    0.30 
   9  -7   0    2.59    0.35 
   9  -7   0    2.69    0.31 
   9   7   0    2.38    0.31 
   9   7   0    3.46    0.43 
   9   7   0    2.27    0.35 
  -9   7   0    2.18    0.30 
  10  -7   0   42.23    1.13 
  10  -7   0   38.86    1.35 
  10  -7   0   42.81    1.30 
  10   7   0   39.88    1.31 
  10   7   0   40.86    1.17 
  10   7   0   41.81    1.25 
   0  -8   0   75.39    1.63 
   0  -8   0   76.37    1.32 
   0  -8   0   76.37    1.61 
   0  -8   0   73.00    1.48 
   0   8   0   75.35    1.62 
   0   8   0   75.43    1.32 
   0   8   0   75.46    1.49 
   0   8   0   74.22    1.64 
  -1  -8   0   23.44    0.50 
  -1  -8   0   22.80    0.44 
   1  -8   0   22.73    0.51 
   1  -8   0   22.88    0.44 
   1  -8   0   21.93    0.57 
  -1  -8   0   22.47    0.51 
   1  -8   0   21.96    0.50 
   1  -8   0   22.18    0.55 
  -1  -8   0   23.39    0.54 
  -1  -8   0   23.14    0.52 
   1   8   0   22.31    0.55 
   1   8   0   22.98    0.54 
   1   8   0   21.59    0.51 
  -1   8   0   22.00    0.51 
  -1   8   0   21.96    0.47 
  -1   8   0   22.43    0.51 
  -1   8   0   23.07    0.58 
   1   8   0   22.66    0.45 
  -2  -8   0    4.28    0.13 
   2  -8   0    3.84    0.16 
  -2  -8   0    3.79    0.14 
   2  -8   0    4.13    0.13 
   2  -8   0    4.07    0.17 
  -2  -8   0    3.75    0.11 
  -2  -8   0    4.12    0.13 
  -2  -8   0    4.03    0.14 
   2   8   0    4.06    0.18 
   2   8   0    4.47    0.13 
  -2   8   0    3.73    0.16 
   2   8   0    3.99    0.16 
   2   8   0    3.89    0.15 
  -2   8   0    3.92    0.20 
   2   8   0    3.80    0.11 
  -2   8   0    3.63    0.16 
   3  -8   0    2.15    0.15 
  -3  -8   0    2.12    0.12 
  -3  -8   0    2.04    0.10 
   3  -8   0    2.31    0.18 
   3  -8   0    2.08    0.12 
   3  -8   0    2.23    0.15 
   3   8   0    2.13    0.16 
   3   8   0    2.01    0.10 
   3   8   0    2.02    0.13 
   3   8   0    2.28    0.11 
  -3   8   0    2.39    0.17 
   3   8   0    2.23    0.14 
  -3   8   0    2.23    0.15 
  -3   8   0    2.04    0.14 
   4  -8   0   19.13    0.60 
  -4  -8   0   19.42    0.48 
   4  -8   0   19.47    0.51 
   4  -8   0   20.09    0.55 
  -4  -8   0   19.75    0.46 
   4  -8   0   19.54    0.52 
  -4   8   0   19.57    0.54 
   4   8   0   20.87    0.48 
   4   8   0   20.64    0.49 
  -4   8   0   21.36    0.60 
   4   8   0   20.35    0.49 
   4   8   0   20.06    0.53 
  -5  -8   0   95.71    2.02 
  -5  -8   0   99.26    1.81 
   5  -8   0   91.48    2.23 
   5  -8   0   97.71    2.12 
   5  -8   0   99.74    2.02 
   5  -8   0   97.80    2.08 
   5   8   0  102.61    2.05 
   5   8   0  101.05    2.05 
   5   8   0   97.58    2.16 
   5   8   0   98.46    1.85 
  -5   8   0   97.92    2.10 
  -6  -8   0   18.14    0.49 
   6  -8   0   18.67    0.56 
  -6  -8   0   18.57    0.52 
   6  -8   0   17.58    0.64 
   6  -8   0   18.24    0.55 
   6  -8   0   18.22    0.60 
   6   8   0   18.22    0.54 
  -6   8   0   17.68    0.57 
  -6   8   0   20.45    0.61 
   6   8   0   19.08    0.50 
   6   8   0   18.95    0.55 
   6   8   0   18.05    0.57 
   7  -8   0   69.17    1.58 
   7  -8   0   65.02    1.71 
  -7  -8   0   66.85    1.51 
   7  -8   0   66.50    1.63 
   7  -8   0   67.67    1.43 
   7  -8   0   69.37    1.55 
   7   8   0   67.04    1.64 
   7   8   0   67.49    1.51 
   7   8   0   69.97    1.57 
  -7   8   0   73.05    1.65 
   7   8   0   68.79    1.44 
   8  -8   0   10.53    0.50 
   8  -8   0   10.55    0.46 
   8  -8   0   10.82    0.57 
   8  -8   0   10.05    0.52 
  -8  -8   0   10.25    0.45 
   8   8   0   11.10    0.50 
  -8   8   0   11.28    0.50 
   8   8   0   10.36    0.53 
   8   8   0   10.09    0.50 
   9  -8   0   39.94    1.01 
  -9  -8   0   37.31    1.04 
   9  -8   0   38.83    1.16 
   9  -8   0   38.41    1.23 
   9   8   0   38.28    1.06 
  -9   8   0   40.34    1.10 
   9   8   0   37.75    1.01 
   9   8   0   38.69    1.11 
   9   8   0   38.59    1.18 
  10  -8   0    0.59    0.30 
  10  -8   0    0.26    0.35 
  10  -8   0    0.52    0.33 
  10   8   0    0.60    0.37 
  10   8   0    0.34    0.35 
  10   8   0    0.90    0.36 
   0  -9   0    0.04    0.03 
   0  -9   0    0.04    0.05 
   0  -9   0    0.08    0.05 
   0  -9   0    0.08    0.04 
   0  -9   0    0.21    0.05 
   0   9   0    0.12    0.03 
   0   9   0    0.13    0.05 
   0   9   0    0.16    0.04 
   0   9   0    0.03    0.04 
   0   9   0    0.05    0.04 
  -1  -9   0  190.40    3.28 
  -1  -9   0  196.33    3.99 
  -1  -9   0  194.35    3.88 
  -1  -9   0  197.90    3.66 
   1  -9   0  191.86    4.03 
   1  -9   0  189.39    3.66 
   1  -9   0  193.35    4.01 
  -1  -9   0  194.16    4.03 
   1  -9   0  191.58    3.31 
   1  -9   0  182.63    3.77 
  -1   9   0  184.88    3.82 
  -1   9   0  195.50    4.05 
   1   9   0  188.85    3.32 
   1   9   0  194.55    4.02 
   1   9   0  193.43    4.00 
   1   9   0  189.29    3.66 
  -1   9   0  188.11    3.78 
   2  -9   0    0.23    0.06 
   2  -9   0    0.31    0.08 
   2  -9   0    0.30    0.07 
  -2  -9   0    0.29    0.05 
   2  -9   0    0.33    0.05 
  -2  -9   0    0.36    0.05 
  -2  -9   0    0.25    0.05 
  -2  -9   0    0.30    0.04 
   2   9   0    0.55    0.07 
   2   9   0    0.29    0.06 
  -2   9   0    0.27    0.08 
   2   9   0    0.24    0.06 
  -2   9   0    0.32    0.07 
  -2   9   0    0.31    0.07 
  -3  -9   0  269.19    4.61 
   3  -9   0  272.57    5.13 
  -3  -9   0  266.40    5.31 
   3  -9   0  254.09    5.66 
   3  -9   0  261.09    5.34 
   3  -9   0  260.33    5.38 
   3   9   0  281.16    5.43 
   3   9   0  274.55    5.33 
   3   9   0  270.67    4.63 
   3   9   0  267.69    5.15 
  -3   9   0  265.64    5.12 
  -3   9   0  265.38    5.34 
   3   9   0  272.59    5.63 
  -3   9   0  282.79    5.68 
   4  -9   0    9.89    0.34 
  -4  -9   0    9.63    0.28 
   4  -9   0    9.95    0.31 
   4  -9   0    9.61    0.39 
   4  -9   0   10.01    0.36 
  -4  -9   0   10.54    0.30 
   4   9   0   10.08    0.29 
  -4   9   0    9.85    0.34 
   4   9   0   10.51    0.28 
   4   9   0   10.26    0.32 
   4   9   0   10.45    0.34 
  -4   9   0   10.79    0.39 
  -4   9   0   10.44    0.35 
   5  -9   0  180.57    4.11 
   5  -9   0  192.46    3.72 
  -5  -9   0  189.05    3.34 
  -5  -9   0  186.53    3.78 
   5  -9   0  188.17    3.89 
   5  -9   0  188.67    3.87 
   5   9   0  188.11    3.38 
  -5   9   0  196.11    4.10 
   5   9   0  192.44    3.81 
  -5   9   0  187.73    3.87 
   5   9   0  191.10    4.03 
   5   9   0  193.16    3.84 
  -6  -9   0   23.91    0.62 
   6  -9   0   24.35    0.72 
   6  -9   0   23.48    0.77 
   6  -9   0   24.55    0.66 
   6  -9   0   23.72    0.67 
  -6  -9   0   24.46    0.59 
  -6   9   0   23.91    0.70 
   6   9   0   24.78    0.66 
   6   9   0   23.16    0.69 
   6   9   0   24.55    0.65 
  -6   9   0   26.55    0.74 
   6   9   0   24.55    0.62 
   7  -9   0   27.79    0.84 
   7  -9   0   26.59    0.88 
   7  -9   0   27.54    0.71 
   7  -9   0   28.08    0.77 
  -7  -9   0   26.52    0.72 
   7  -9   0   27.61    0.78 
   7   9   0   28.34    0.77 
   7   9   0   27.09    0.75 
  -7   9   0   29.06    0.83 
   7   9   0   27.31    0.82 
   7   9   0   27.46    0.71 
   8  -9   0   16.35    0.56 
   8  -9   0   16.13    0.62 
  -8  -9   0   15.20    0.54 
   8  -9   0   16.15    0.70 
   8  -9   0   16.46    0.66 
   8   9   0   16.62    0.54 
  -8   9   0   17.08    0.63 
   8   9   0   15.73    0.64 
   8   9   0   16.43    0.61 
   8   9   0   16.44    0.61 
   9  -9   0    3.88    0.51 
   9  -9   0    2.69    0.33 
   9  -9   0    2.10    0.34 
   9   9   0    3.02    0.39 
   9   9   0    3.02    0.37 
   9   9   0    2.85    0.37 
  -9   9   0    2.92    0.36 
   9   9   0    2.13    0.35 
  10  -9   0   11.27    0.72 
  10  -9   0   10.83    0.63 
  10  -9   0   12.16    0.77 
  10   9   0   10.81    0.71 
  10   9   0    9.52    0.74 
  10   9   0    9.94    0.70 
   0 -10   0   76.46    1.55 
   0 -10   0   78.64    1.69 
   0 -10   0   78.24    1.57 
   0 -10   0   78.99    1.71 
   0 -10   0   77.60    1.38 
   0  10   0   77.60    1.57 
   0  10   0   78.65    1.70 
   0  10   0   78.30    1.73 
   0  10   0   78.28    1.38 
   0  10   0   78.74    1.55 
   1 -10   0   10.73    0.28 
  -1 -10   0   11.12    0.26 
  -1 -10   0   11.26    0.32 
   1 -10   0   10.87    0.35 
   1 -10   0   10.77    0.33 
   1 -10   0   11.22    0.32 
  -1 -10   0   11.18    0.29 
  -1 -10   0   11.23    0.30 
   1 -10   0   11.42    0.26 
  -1  10   0   11.53    0.37 
   1  10   0   11.28    0.32 
   1  10   0   11.14    0.32 
   1  10   0   11.43    0.35 
  -1  10   0   11.17    0.32 
  -1  10   0   10.79    0.29 
   1  10   0   10.93    0.27 
  -2 -10   0   92.96    1.90 
   2 -10   0   86.66    1.99 
   2 -10   0   88.98    1.97 
  -2 -10   0   90.65    1.60 
   2 -10   0   87.14    1.84 
  -2 -10   0   91.08    1.88 
   2 -10   0   91.78    1.81 
  -2 -10   0   90.76    1.82 
   2 -10   0   88.86    1.79 
   2  10   0   86.22    1.80 
   2  10   0   88.67    1.61 
   2  10   0   89.59    1.95 
  -2  10   0   89.16    1.85 
  -2  10   0   88.05    1.79 
  -2  10   0   91.90    2.01 
   2  10   0   90.95    1.93 
  -3 -10   0   14.87    0.34 
   3 -10   0   14.69    0.42 
   3 -10   0   14.77    0.37 
   3 -10   0   14.70    0.42 
  -3 -10   0   14.89    0.36 
   3 -10   0   14.23    0.48 
   3  10   0   14.71    0.44 
   3  10   0   14.80    0.36 
   3  10   0   15.22    0.34 
  -3  10   0   14.41    0.42 
   3  10   0   14.63    0.38 
  -3  10   0   15.00    0.41 
   3  10   0   14.71    0.42 
  -3  10   0   15.87    0.49 
   4 -10   0   87.69    1.82 
   4 -10   0   85.46    2.00 
   4 -10   0   88.30    1.87 
  -4 -10   0   88.01    1.60 
  -4 -10   0   86.30    1.76 
   4 -10   0   83.69    1.80 
   4  10   0   89.00    1.91 
   4  10   0   87.22    1.63 
  -4  10   0   86.77    1.86 
   4  10   0   89.25    1.78 
   4  10   0   87.71    1.79 
   4  10   0   85.34    1.82 
  -4  10   0   84.42    1.78 
   5 -10   0   49.03    1.27 
  -5 -10   0   49.25    1.08 
   5 -10   0   48.92    1.19 
   5 -10   0   49.57    1.13 
   5 -10   0   48.99    1.13 
  -5 -10   0   50.24    1.00 
  -5  10   0   48.34    1.17 
   5  10   0   50.43    1.05 
   5  10   0   50.29    1.10 
  -5  10   0   52.46    1.26 
   5  10   0   51.02    1.09 
   5  10   0   49.39    1.19 
   6 -10   0   73.33    1.60 
   6 -10   0   71.63    1.68 
   6 -10   0   69.22    1.78 
   6 -10   0   72.61    1.62 
  -6 -10   0   72.40    1.56 
  -6 -10   0   72.19    1.42 
   6  10   0   74.00    1.59 
   6  10   0   72.27    1.47 
   6  10   0   72.14    1.69 
  -6  10   0   70.17    1.65 
  -6  10   0   78.46    1.76 
   6  10   0   74.68    1.57 
   7 -10   0    7.70    0.48 
   7 -10   0    7.85    0.40 
  -7 -10   0    7.68    0.34 
   7 -10   0    7.29    0.36 
   7 -10   0    8.24    0.37 
   7 -10   0    7.02    0.42 
   7  10   0    7.93    0.41 
   7  10   0    7.53    0.32 
   7  10   0    7.39    0.42 
   7  10   0    7.76    0.37 
  -7  10   0    8.35    0.43 
  -8 -10   0    5.12    0.35 
   8 -10   0    5.88    0.38 
   8 -10   0    4.51    0.46 
   8 -10   0    5.06    0.42 
   8  10   0    4.86    0.38 
  -8  10   0    5.14    0.43 
   8  10   0    5.63    0.44 
   8  10   0    6.12    0.34 
   8  10   0    4.51    0.43 
   9 -10   0    6.92    0.53 
   9 -10   0    8.36    0.61 
   9 -10   0    6.40    0.48 
   9  10   0    7.24    0.53 
   9  10   0    7.37    0.54 
   9  10   0    7.60    0.48 
   9  10   0    7.36    0.58 
  10 -10   0    1.42    0.40 
  10 -10   0    1.09    0.32 
  10  10   0    1.29    0.42 
  10  10   0    1.15    0.42 
   0 -11   0    0.05    0.04 
   0 -11   0    0.20    0.06 
   0 -11   0    0.28    0.07 
   0 -11   0    0.24    0.07 
   0 -11   0    0.13    0.04 
   0  11   0    0.16    0.08 
   0  11   0    0.17    0.05 
   0  11   0    0.12    0.06 
   0  11   0    0.27    0.07 
   0  11   0    0.21    0.04 
  -1 -11   0   84.52    1.69 
  -1 -11   0   84.52    1.79 
  -1 -11   0   85.31    1.81 
   1 -11   0   84.25    1.49 
   1 -11   0   81.94    1.83 
   1 -11   0   81.08    1.68 
   1 -11   0   82.31    1.70 
   1 -11   0   83.02    1.86 
  -1 -11   0   84.13    1.73 
  -1 -11   0   81.58    1.49 
   1  11   0   84.07    1.50 
   1  11   0   84.10    1.82 
  -1  11   0   85.16    1.69 
  -1  11   0   86.90    1.89 
   1  11   0   84.07    1.85 
  -1  11   0   83.49    1.71 
   2 -11   0   20.44    0.44 
   2 -11   0   20.18    0.51 
   2 -11   0   19.42    0.57 
   2 -11   0   19.65    0.54 
  -2 -11   0   20.15    0.47 
  -2 -11   0   19.20    0.43 
   2 -11   0   19.01    0.49 
  -2 -11   0   20.21    0.46 
  -2 -11   0   20.26    0.48 
   2  11   0   19.83    0.53 
  -2  11   0   19.91    0.51 
   2  11   0   18.79    0.51 
  -2  11   0   20.64    0.59 
  -2  11   0   19.48    0.50 
   2  11   0   20.41    0.52 
   2  11   0   19.61    0.44 
   3 -11   0   73.92    1.54 
  -3 -11   0   75.61    1.37 
   3 -11   0   73.19    1.59 
   3 -11   0   77.61    1.55 
  -3 -11   0   75.18    1.48 
   3 -11   0   71.37    1.72 
  -3  11   0   72.69    1.59 
  -3  11   0   76.28    1.54 
   3  11   0   74.39    1.39 
   3  11   0   72.36    1.56 
  -3  11   0   75.77    1.73 
   3  11   0   74.57    1.64 
   4 -11   0   42.42    0.96 
   4 -11   0   40.03    1.08 
   4 -11   0   40.94    0.99 
  -4 -11   0   40.86    0.88 
   4 -11   0   42.23    0.93 
   4  11   0   42.01    0.87 
  -4  11   0   41.20    0.95 
   4  11   0   41.36    1.00 
   4  11   0   42.00    0.89 
   4  11   0   39.86    0.98 
  -4  11   0   43.61    1.08 
   4  11   0   42.83    0.90 
  -5 -11   0   29.19    0.69 
   5 -11   0   29.50    0.74 
   5 -11   0   29.68    0.81 
  -5 -11   0   30.56    0.67 
   5 -11   0   29.39    0.87 
   5 -11   0   31.04    0.78 
  -5  11   0   32.22    0.87 
  -5  11   0   30.06    0.80 
   5  11   0   30.02    0.72 
   5  11   0   30.60    0.70 
   5  11   0   30.63    0.72 
   5  11   0   30.08    0.79 
   5  11   0   29.48    0.80 
  -6 -11   0   72.72    1.44 
   6 -11   0   70.27    1.73 
   6 -11   0   73.25    1.63 
  -6 -11   0   73.06    1.57 
   6 -11   0   74.76    1.64 
   6  11   0   75.27    1.58 
  -6  11   0   72.39    1.68 
   6  11   0   76.19    1.61 
   6  11   0   73.02    1.50 
  -6  11   0   78.43    1.79 
   6  11   0   74.10    1.73 
   7 -11   0   11.13    0.47 
   7 -11   0   10.71    0.51 
   7 -11   0   11.88    0.45 
   7 -11   0   10.81    0.55 
  -7 -11   0   10.60    0.39 
   7  11   0   10.45    0.49 
  -7  11   0   11.54    0.51 
   7  11   0   10.68    0.48 
   7  11   0   11.26    0.39 
   7  11   0   10.77    0.44 
  -7  11   0   10.51    0.47 
  -8 -11   0   18.81    0.60 
   8 -11   0   19.91    0.62 
   8 -11   0   18.13    0.78 
   8 -11   0   19.75    0.73 
   8  11   0   19.97    0.67 
   8  11   0   18.58    0.58 
   8  11   0   18.93    0.69 
   9 -11   0    2.05    0.34 
   9 -11   0    2.54    0.38 
   9 -11   0    2.73    0.35 
   9  11   0    2.18    0.37 
  -9  11   0    1.56    0.34 
   9  11   0    2.92    0.37 
   9  11   0    2.03    0.38 
   0 -12   0   33.65    0.80 
   0 -12   0   33.56    0.76 
   0 -12   0   33.89    0.82 
   0 -12   0   33.53    0.65 
   0 -12   0   33.73    0.70 
   0  12   0   34.08    0.77 
   0  12   0   33.97    0.82 
   0  12   0   33.05    0.65 
   0  12   0   33.37    0.85 
   1 -12   0   26.55    0.70 
  -1 -12   0   26.95    0.54 
  -1 -12   0   26.29    0.61 
   1 -12   0   26.21    0.67 
  -1 -12   0   27.13    0.65 
  -1 -12   0   26.42    0.63 
  -1 -12   0   26.96    0.63 
   1 -12   0   26.09    0.53 
   1 -12   0   25.21    0.62 
   1 -12   0   25.99    0.59 
   1  12   0   26.64    0.67 
  -1  12   0   26.25    0.60 
   1  12   0   25.96    0.54 
   1  12   0   26.88    0.69 
  -1  12   0   27.16    0.72 
   2 -12   0    6.81    0.28 
  -2 -12   0    7.02    0.27 
  -2 -12   0    7.32    0.23 
   2 -12   0    6.59    0.21 
   2 -12   0    6.85    0.24 
  -2 -12   0    7.03    0.21 
   2 -12   0    6.99    0.26 
  -2 -12   0    6.98    0.21 
   2 -12   0    7.30    0.31 
  -2 -12   0    7.05    0.22 
  -2  12   0    6.89    0.27 
   2  12   0    6.73    0.23 
   2  12   0    7.14    0.28 
   2  12   0    6.80    0.26 
  -2  12   0    7.05    0.25 
  -2  12   0    8.27    0.33 
   2  12   0    6.65    0.27 
   3 -12   0  115.35    2.41 
   3 -12   0  116.90    2.37 
   3 -12   0  113.57    2.59 
  -3 -12   0  118.19    2.08 
   3  12   0  118.58    2.11 
  -3  12   0  116.79    2.42 
   3  12   0  116.23    2.36 
  -3  12   0  117.77    2.33 
   3  12   0  116.79    2.52 
  -4 -12   0    2.09    0.12 
  -4 -12   0    2.16    0.16 
   4 -12   0    2.22    0.15 
   4 -12   0    2.54    0.24 
   4 -12   0    2.23    0.20 
   4 -12   0    2.25    0.19 
  -4  12   0    2.30    0.23 
   4  12   0    2.37    0.20 
   4  12   0    2.32    0.22 
  -4  12   0    1.99    0.19 
   4  12   0    2.19    0.19 
  -4  12   0    2.32    0.20 
   4  12   0    2.28    0.13 
   4  12   0    2.02    0.13 
   5 -12   0   66.78    1.45 
   5 -12   0   65.20    1.45 
  -5 -12   0   65.18    1.38 
  -5 -12   0   65.56    1.28 
   5 -12   0   61.44    1.62 
   5 -12   0   64.97    1.51 
   5  12   0   68.26    1.40 
  -5  12   0   65.23    1.50 
   5  12   0   65.47    1.49 
   5  12   0   65.96    1.54 
   5  12   0   66.38    1.33 
  -5  12   0   71.12    1.63 
   5  12   0   68.20    1.40 
   6 -12   0    0.97    0.21 
   6 -12   0    1.23    0.16 
  -6 -12   0    1.17    0.14 
   6 -12   0    1.08    0.18 
  -6 -12   0    1.22    0.16 
   6  12   0    1.15    0.13 
   6  12   0    1.07    0.19 
  -6  12   0    1.11    0.19 
   6  12   0    1.13    0.21 
  -6  12   0    1.34    0.21 
   6  12   0    1.43    0.17 
   7 -12   0  128.10    3.05 
   7 -12   0  134.12    2.75 
   7 -12   0  130.97    2.79 
   7 -12   0  130.94    2.88 
  -7 -12   0  124.34    2.42 
   7  12   0  133.78    2.72 
   7  12   0  136.10    2.76 
   7  12   0  126.99    2.78 
   7  12   0  130.56    2.94 
  -7  12   0  126.09    2.83 
   7  12   0  131.06    2.52 
  -7  12   0  137.07    2.99 
   8 -12   0    0.41    0.22 
   8 -12   0    0.33    0.20 
   8 -12   0    0.14    0.24 
  -8 -12   0    0.19    0.17 
   8  12   0   -0.43    0.21 
   8  12   0    0.34    0.21 
   9 -12   0   85.01    1.76 
   9 -12   0   79.89    2.04 
   9 -12   0   82.62    2.01 
   9 -12   0   81.77    2.17 
   9  12   0   84.44    1.94 
   9  12   0   80.85    1.83 
  -9  12   0   82.94    2.06 
   9  12   0   82.13    2.09 
   0 -13   0    0.21    0.06 
   0 -13   0    0.19    0.04 
   0 -13   0    0.09    0.06 
   0 -13   0    0.16    0.06 
   0 -13   0    0.22    0.08 
   0  13   0    0.19    0.07 
   0  13   0    0.09    0.07 
   0  13   0    0.26    0.06 
   0  13   0    0.14    0.08 
  -1 -13   0  169.87    3.43 
   1 -13   0  170.99    3.30 
  -1 -13   0  175.06    3.30 
  -1 -13   0  167.46    2.93 
   1 -13   0  165.81    3.35 
   1 -13   0  170.82    3.59 
   1 -13   0  169.02    2.93 
  -1 -13   0  170.18    3.57 
   1 -13   0  171.10    3.62 
  -1 -13   0  171.95    3.55 
   1  13   0  170.27    3.59 
   1  13   0  162.69    3.30 
  -1  13   0  163.98    3.29 
  -1  13   0  170.04    3.66 
   1  13   0  171.21    3.62 
   1  13   0  166.02    2.94 
  -1  13   0  168.90    3.37 
  -2 -13   0   23.14    0.59 
   2 -13   0   22.85    0.59 
  -2 -13   0   23.71    0.56 
  -2 -13   0   23.10    0.53 
  -2 -13   0   23.23    0.50 
  -2 -13   0   23.36    0.55 
   2 -13   0   22.37    0.66 
   2 -13   0   23.12    0.50 
   2 -13   0   23.48    0.57 
   2 -13   0   22.98    0.63 
  -2  13   0   23.68    0.68 
   2  13   0   23.15    0.61 
   2  13   0   22.17    0.51 
  -2  13   0   22.53    0.58 
   2  13   0   22.87    0.63 
   2  13   0   22.79    0.60 
  -2  13   0   23.35    0.58 
   3 -13   0   35.74    0.86 
   3 -13   0   36.90    0.79 
   3 -13   0   35.93    0.86 
   3 -13   0   35.37    0.96 
   3 -13   0   36.33    0.93 
  -3 -13   0   36.92    0.75 
  -3  13   0   37.68    0.98 
   3  13   0   36.97    0.77 
  -3  13   0   36.50    0.85 
   3  13   0   36.31    0.89 
  -3  13   0   36.17    0.87 
   4 -13   0   26.66    0.63 
   4 -13   0   26.80    0.70 
  -4 -13   0   26.95    0.60 
   4 -13   0   26.19    0.79 
  -4 -13   0   26.66    0.57 
   4 -13   0   26.12    0.70 
  -4  13   0   28.09    0.80 
  -4  13   0   26.55    0.69 
   4  13   0   26.71    0.63 
  -4  13   0   25.93    0.70 
   4  13   0   25.77    0.71 
   4  13   0   26.20    0.71 
   5 -13   0   21.74    0.73 
  -5 -13   0   22.38    0.55 
   5 -13   0   21.44    0.66 
  -5 -13   0   22.16    0.53 
   5 -13   0   22.93    0.59 
   5 -13   0   22.06    0.64 
   5  13   0   23.02    0.54 
   5  13   0   22.75    0.55 
   5  13   0   22.27    0.65 
   5  13   0   21.98    0.68 
  -5  13   0   23.50    0.73 
  -5  13   0   22.24    0.63 
   5  13   0   22.45    0.60 
  -5  13   0   22.54    0.66 
   6 -13   0   54.95    1.49 
  -6 -13   0   56.25    1.16 
  -6 -13   0   56.30    1.23 
   6 -13   0   57.81    1.33 
   6 -13   0   57.32    1.39 
   6 -13   0   55.77    1.31 
   6  13   0   57.09    1.23 
   6  13   0   59.72    1.24 
  -6  13   0   58.64    1.47 
   6  13   0   55.97    1.39 
   6  13   0   58.23    1.26 
  -6  13   0   55.34    1.37 
   6  13   0   56.19    1.37 
   7 -13   0   23.27    0.77 
   7 -13   0   24.18    0.69 
  -7 -13   0   22.89    0.62 
   7 -13   0   22.39    0.83 
  -7 -13   0   22.77    0.62 
   7 -13   0   22.86    0.74 
   7  13   0   22.41    0.75 
   7  13   0   23.66    0.67 
   7  13   0   23.39    0.60 
   7  13   0   22.71    0.70 
  -7  13   0   23.03    0.74 
   7  13   0   22.01    0.76 
  -8 -13   0   27.67    0.76 
   8 -13   0   28.47    0.78 
   8 -13   0   27.57    0.99 
   8 -13   0   28.54    0.93 
   8  13   0   27.63    0.92 
   8  13   0   27.68    0.92 
   8  13   0   28.67    0.83 
   8  13   0   28.12    0.74 
   8  13   0   28.79    0.86 
  -8  13   0   28.36    0.95 
   9 -13   0    9.12    0.60 
   9 -13   0    9.29    0.60 
   9 -13   0   10.58    0.56 
   9 -13   0    9.37    0.67 
   9  13   0    9.85    0.59 
   9  13   0    9.69    0.64 
   9  13   0    9.43    0.66 
   9  13   0    9.28    0.64 
   0 -14   0  188.63    3.69 
   0 -14   0  189.48    4.00 
   0 -14   0  189.07    3.26 
   0 -14   0  191.26    3.98 
   0 -14   0  185.70    3.66 
   0  14   0  185.45    3.66 
   0  14   0  187.54    3.26 
   0  14   0  190.11    4.05 
   0  14   0  189.60    4.01 
   1 -14   0   19.31    0.52 
  -1 -14   0   19.85    0.49 
   1 -14   0   19.82    0.55 
  -1 -14   0   20.13    0.51 
  -1 -14   0   20.24    0.44 
   1 -14   0   19.73    0.44 
   1 -14   0   19.84    0.58 
   1 -14   0   19.33    0.47 
  -1 -14   0   19.92    0.53 
  -1 -14   0   20.42    0.53 
   1  14   0   19.59    0.45 
   1  14   0   19.22    0.53 
  -1  14   0   20.05    0.48 
   1  14   0   20.18    0.59 
  -1  14   0   20.26    0.61 
   1  14   0   19.46    0.55 
   2 -14   0  116.62    2.42 
   2 -14   0  119.28    2.67 
  -2 -14   0  123.22    2.43 
  -2 -14   0  123.98    2.56 
   2 -14   0  122.77    2.14 
  -2 -14   0  122.03    2.54 
  -2 -14   0  119.89    2.14 
  -2 -14   0  122.91    2.47 
   2 -14   0  118.13    2.46 
   2 -14   0  121.07    2.65 
   2  14   0  116.04    2.43 
   2  14   0  119.26    2.62 
  -2  14   0  122.61    2.42 
  -2  14   0  118.98    2.47 
   2  14   0  122.62    2.65 
  -2  14   0  122.88    2.71 
   2  14   0  121.62    2.16 
   3 -14   0    4.90    0.27 
   3 -14   0    4.71    0.17 
   3 -14   0    4.67    0.25 
   3 -14   0    4.84    0.30 
  -3 -14   0    4.62    0.20 
   3 -14   0    4.62    0.23 
  -3 -14   0    4.79    0.17 
  -3  14   0    4.84    0.25 
  -3  14   0    5.00    0.31 
   3  14   0    4.96    0.25 
   3  14   0    4.50    0.26 
   3  14   0    4.56    0.23 
  -3  14   0    4.68    0.24 
   4 -14   0   53.74    1.17 
   4 -14   0   54.36    1.23 
   4 -14   0   53.16    1.38 
  -4 -14   0   54.59    1.07 
   4 -14   0   54.96    1.26 
  -4  14   0   54.23    1.26 
   4  14   0   54.88    1.11 
  -4  14   0   53.87    1.22 
  -4  14   0   55.89    1.38 
   4  14   0   53.74    1.25 
   4  14   0   54.61    1.29 
  -5 -14   0   24.66    0.56 
  -5 -14   0   24.79    0.60 
   5 -14   0   25.12    0.63 
   5 -14   0   23.67    0.71 
   5 -14   0   24.23    0.69 
  -5  14   0   23.82    0.70 
  -5  14   0   24.90    0.69 
   5  14   0   23.73    0.74 
   5  14   0   24.64    0.64 
  -5  14   0   25.50    0.78 
   5  14   0   24.73    0.71 
   6 -14   0   20.14    0.64 
   6 -14   0   18.88    0.73 
  -6 -14   0   20.20    0.52 
   6 -14   0   20.76    0.68 
   6  14   0   20.15    0.68 
   6  14   0   19.81    0.66 
  -6  14   0   20.82    0.73 
   6  14   0   20.78    0.55 
  -6  14   0   19.96    0.66 
   6  14   0   20.59    0.50 
   6  14   0   19.58    0.61 
  -7 -14   0   12.14    0.41 
   7 -14   0   11.62    0.60 
  -7 -14   0   11.58    0.44 
   7 -14   0   11.26    0.54 
   7 -14   0   12.85    0.54 
   7 -14   0   12.22    0.47 
   7  14   0   11.74    0.54 
   7  14   0   12.56    0.46 
   7  14   0   12.35    0.38 
   7  14   0   12.13    0.57 
   7  14   0   12.14    0.52 
  -7  14   0   12.22    0.54 
  -8 -14   0    9.18    0.42 
   8 -14   0    9.49    0.56 
   8 -14   0    9.14    0.60 
   8 -14   0   10.63    0.49 
  -8  14   0    9.57    0.61 
   8  14   0   10.32    0.39 
   8  14   0    9.84    0.58 
   8  14   0   10.26    0.49 
   8  14   0    9.04    0.56 
   8  14   0   10.24    0.57 
   9 -14   0    1.36    0.35 
   9 -14   0    1.11    0.32 
   9 -14   0    1.50    0.31 
   9 -14   0    1.17    0.33 
   9  14   0    1.01    0.36 
   9  14   0    1.17    0.35 
   9  14   0    1.47    0.33 
   0 -15   0    0.15    0.07 
   0 -15   0    0.22    0.05 
   0 -15   0    0.09    0.08 
   0 -15   0    0.24    0.07 
   0 -15   0    0.06    0.08 
   0  15   0    0.21    0.09 
   0  15   0    0.13    0.10 
   0  15   0    0.24    0.09 
   0  15   0    0.20    0.07 
  -1 -15   0  137.84    2.88 
   1 -15   0  136.09    2.68 
   1 -15   0  134.59    2.37 
  -1 -15   0  135.13    2.37 
  -1 -15   0  135.23    2.86 
   1 -15   0  132.91    2.69 
  -1 -15   0  134.01    2.68 
   1 -15   0  133.78    2.94 
  -1 -15   0  134.49    2.76 
   1 -15   0  135.68    2.91 
   1  15   0  134.87    2.95 
  -1  15   0  133.24    2.68 
  -1  15   0  134.08    2.70 
   1  15   0  133.53    2.69 
   1  15   0  131.32    2.38 
   1  15   0  135.95    2.92 
   2 -15   0    7.85    0.31 
  -2 -15   0    7.81    0.25 
  -2 -15   0    7.90    0.31 
  -2 -15   0    8.07    0.25 
  -2 -15   0    8.10    0.27 
   2 -15   0    7.66    0.32 
  -2 -15   0    7.98    0.25 
   2 -15   0    8.06    0.25 
   2 -15   0    7.66    0.27 
   2 -15   0    8.56    0.36 
  -2  15   0    8.29    0.37 
   2  15   0    7.53    0.32 
   2  15   0    7.97    0.32 
  -2  15   0    8.07    0.28 
   2  15   0    7.57    0.27 
   2  15   0    8.24    0.34 
  -2  15   0    7.77    0.31 
  -3 -15   0  260.48    5.06 
   3 -15   0  248.42    5.06 
   3 -15   0  246.69    5.41 
   3 -15   0  258.18    4.38 
   3 -15   0  253.55    5.02 
   3 -15   0  252.73    4.90 
   3 -15   0  251.92    5.38 
  -3  15   0  251.14    4.89 
   3  15   0  250.66    5.33 
  -3  15   0  249.28    5.07 
   3  15   0  254.89    4.41 
  -3  15   0  257.69    5.44 
   3  15   0  251.68    4.93 
  -4 -15   0    7.59    0.28 
   4 -15   0    7.42    0.25 
   4 -15   0    7.33    0.33 
   4 -15   0    7.37    0.40 
   4  15   0    6.89    0.35 
  -4  15   0    7.51    0.33 
  -4  15   0    7.76    0.40 
  -4  15   0    7.46    0.33 
   4  15   0    7.52    0.32 
   4  15   0    6.89    0.33 
   5 -15   0   56.68    1.49 
  -5 -15   0   57.47    1.16 
   5 -15   0   60.37    1.28 
  -5 -15   0   57.53    1.18 
   5 -15   0   56.42    1.32 
   5 -15   0   56.79    1.36 
   5  15   0   56.87    1.21 
   5  15   0   57.51    1.39 
  -5  15   0   56.47    1.36 
   5  15   0   56.17    1.36 
  -5  15   0   60.02    1.49 
  -5  15   0   56.78    1.31 
  -6 -15   0    3.01    0.19 
   6 -15   0    2.83    0.35 
   6 -15   0    2.66    0.29 
   6 -15   0    2.91    0.31 
   6  15   0    2.52    0.32 
   6  15   0    3.25    0.32 
  -6  15   0    3.05    0.31 
   6  15   0    2.73    0.31 
   7 -15   0   27.86    0.76 
  -7 -15   0   26.50    0.68 
   7 -15   0   27.00    0.94 
   7 -15   0   26.30    0.86 
  -7 -15   0   25.39    0.70 
   7  15   0   26.87    0.72 
   7  15   0   26.01    0.85 
   7  15   0   27.99    0.80 
  -7  15   0   26.80    0.85 
   7  15   0   26.25    0.87 
  -7  15   0   26.80    0.90 
  -8 -15   0    8.15    0.40 
   8 -15   0    6.18    0.44 
   8 -15   0    8.07    0.55 
   8 -15   0    9.08    0.47 
   8 -15   0    8.01    0.58 
   8  15   0    8.02    0.55 
   8  15   0    8.09    0.55 
   8  15   0    8.16    0.46 
   8  15   0    7.56    0.55 
   9 -15   0    1.64    0.39 
   9 -15   0    2.45    0.34 
   9 -15   0    1.85    0.36 
   9  15   0    1.49    0.40 
   9  15   0    1.68    0.36 
   9  15   0    1.37    0.36 
   9  15   0    2.18    0.41 
   0 -16   0    1.27    0.13 
   0 -16   0    1.35    0.09 
   0 -16   0    1.14    0.15 
   0 -16   0    1.58    0.15 
   0  16   0    1.27    0.16 
   0  16   0    1.36    0.17 
   1 -16   0    3.12    0.16 
   1 -16   0    3.30    0.21 
  -1 -16   0    3.09    0.19 
   1 -16   0    2.81    0.20 
  -1 -16   0    2.81    0.17 
   1 -16   0    2.89    0.15 
  -1 -16   0    3.04    0.16 
  -1 -16   0    2.51    0.20 
   1 -16   0    3.10    0.23 
  -1 -16   0    3.31    0.18 
  -1  16   0    3.11    0.25 
   1  16   0    3.27    0.24 
   1  16   0    2.86    0.17 
   1  16   0    2.84    0.21 
   1  16   0    2.89    0.22 
  -1  16   0    2.71    0.21 
  -1  16   0    2.98    0.16 
   2 -16   0   20.33    0.64 
   2 -16   0   20.97    0.48 
   2 -16   0   20.45    0.57 
  -2 -16   0   21.16    0.58 
  -2 -16   0   20.28    0.48 
  -2 -16   0   20.50    0.51 
  -2 -16   0   21.04    0.51 
   2 -16   0   20.68    0.61 
  -2 -16   0   21.33    0.53 
   2 -16   0   20.19    0.53 
   2  16   0   20.94    0.62 
   2  16   0   20.35    0.50 
  -2  16   0   21.94    0.68 
   2  16   0   19.86    0.58 
   2  16   0   20.17    0.59 
  -2  16   0   20.47    0.54 
  -2  16   0   19.99    0.57 
   3 -16   0    0.84    0.14 
  -3 -16   0    0.88    0.09 
   3 -16   0    0.73    0.11 
   3 -16   0    0.71    0.15 
   3 -16   0    0.84    0.14 
  -3 -16   0    0.75    0.12 
   3 -16   0    0.75    0.13 
  -3  16   0    0.89    0.14 
  -3  16   0    0.63    0.13 
  -3  16   0    0.90    0.18 
   3  16   0    0.85    0.14 
   3  16   0    0.62    0.14 
   3  16   0    0.79    0.14 
   4 -16   0   13.91    0.47 
   4 -16   0   13.53    0.47 
   4 -16   0   14.19    0.52 
   4 -16   0   14.41    0.38 
   4 -16   0   13.12    0.54 
  -4 -16   0   13.43    0.40 
   4  16   0   13.62    0.48 
  -4  16   0   13.98    0.47 
   4  16   0   14.24    0.44 
  -4  16   0   14.30    0.57 
   4  16   0   13.09    0.50 
  -4  16   0   13.63    0.47 
   5 -16   0   91.49    2.04 
  -5 -16   0   91.30    1.74 
   5 -16   0   91.07    2.21 
   5 -16   0   91.79    1.98 
   5 -16   0   94.16    1.94 
   5  16   0   94.68    1.81 
   5  16   0   90.71    2.02 
  -5  16   0   93.43    1.97 
  -5  16   0   89.23    2.03 
   5  16   0   90.19    2.10 
   6 -16   0    8.66    0.36 
   6 -16   0    9.08    0.51 
   6 -16   0    8.66    0.44 
   6 -16   0    8.81    0.44 
  -6  16   0    8.34    0.44 
  -6  16   0    8.14    0.49 
   6  16   0    8.84    0.43 
   6  16   0    8.41    0.45 
   6  16   0    8.28    0.46 
  -7 -16   0   38.63    0.92 
   7 -16   0   39.91    1.23 
   7 -16   0   41.10    1.14 
   7 -16   0   42.59    1.03 
   7  16   0   41.92    1.04 
   7  16   0   37.42    1.18 
   7  16   0   40.89    1.15 
  -7  16   0   40.28    1.21 
   8 -16   0    0.94    0.31 
   8 -16   0    0.76    0.29 
   8 -16   0    1.23    0.27 
   8  16   0    1.64    0.32 
   8  16   0    0.73    0.28 
   8  16   0    1.39    0.33 
   9 -16   0   35.02    0.99 
   9 -16   0   35.98    1.23 
   9  16   0   35.88    1.11 
   9  16   0   32.82    1.19 
   0 -17   0    0.45    0.12 
   0  17   0    0.77    0.14 
   1 -17   0    5.99    0.28 
   1 -17   0    5.96    0.30 
  -1 -17   0    5.42    0.22 
  -1 -17   0    5.47    0.23 
   1 -17   0    5.20    0.20 
   1 -17   0    5.27    0.21 
  -1 -17   0    5.88    0.24 
  -1 -17   0    5.44    0.28 
  -1 -17   0    5.89    0.26 
   1  17   0    5.35    0.29 
  -1  17   0    5.62    0.21 
   1  17   0    5.64    0.32 
   1  17   0    5.27    0.23 
   1  17   0    5.60    0.28 
  -1  17   0    5.39    0.33 
  -1  17   0    5.32    0.28 
  -2 -17   0   21.30    0.52 
   2 -17   0   20.27    0.62 
  -2 -17   0   21.06    0.53 
   2 -17   0   21.00    0.54 
   2 -17   0   20.44    0.59 
   2 -17   0   21.00    0.66 
  -2 -17   0   22.10    0.55 
  -2 -17   0   20.06    0.59 
   2 -17   0   21.62    0.50 
  -2  17   0   20.90    0.59 
   2  17   0   20.93    0.61 
   2  17   0   20.65    0.51 
   2  17   0   20.60    0.62 
  -2  17   0   20.60    0.55 
  -2  17   0   21.98    0.70 
   3 -17   0    5.42    0.28 
  -3 -17   0    6.28    0.25 
   3 -17   0    5.76    0.35 
   3 -17   0    6.21    0.31 
  -3 -17   0    6.02    0.22 
   3 -17   0    6.04    0.32 
  -3  17   0    5.62    0.31 
  -3  17   0    5.81    0.29 
   3  17   0    5.59    0.31 
  -3  17   0    6.55    0.39 
   3  17   0    6.10    0.33 
   3  17   0    5.88    0.28 
   4 -17   0   25.52    0.78 
   4 -17   0   26.32    0.61 
  -4 -17   0   26.65    0.62 
   4 -17   0   25.84    0.72 
   4 -17   0   26.16    0.73 
   4  17   0   26.43    0.75 
   4  17   0   26.44    0.66 
   4  17   0   25.45    0.76 
  -4  17   0   26.18    0.73 
   5 -17   0    0.48    0.12 
   5 -17   0    0.29    0.17 
   5 -17   0    0.50    0.18 
   5 -17   0    0.09    0.13 
  -5 -17   0    0.39    0.14 
   5  17   0    0.30    0.16 
  -5  17   0    0.28    0.15 
  -5  17   0    0.06    0.15 
   5  17   0    0.40    0.17 
   6 -17   0   48.38    1.38 
  -6 -17   0   46.73    1.05 
   6 -17   0   50.41    1.14 
   6 -17   0   47.82    1.26 
   6 -17   0   48.49    1.23 
  -6  17   0   49.13    1.26 
   6  17   0   48.21    1.27 
   6  17   0   50.15    1.28 
  -6  17   0   50.75    1.37 
   6  17   0   48.78    1.13 
   7 -17   0    1.53    0.24 
   7 -17   0    1.32    0.29 
   7 -17   0    1.43    0.26 
   7  17   0    1.46    0.29 
   7  17   0    1.54    0.29 
   7  17   0    1.35    0.27 
   8 -17   0   39.75    1.07 
   8 -17   0   38.12    1.28 
   8 -17   0   38.78    1.18 
   8  17   0   39.04    1.20 
   8  17   0   39.49    1.10 
   8  17   0   37.15    1.17 
   0 -18   0  277.49    4.82 
   0 -18   0  281.25    5.41 
   0 -18   0  281.97    5.89 
   0 -18   0  283.10    5.87 
   0  18   0  274.89    5.92 
   0  18   0  282.33    5.99 
   0  18   0  276.91    5.41 
   1 -18   0   20.37    0.50 
   1 -18   0   20.09    0.59 
  -1 -18   0   20.73    0.60 
   1 -18   0   19.96    0.49 
  -1 -18   0   20.61    0.49 
  -1 -18   0   20.92    0.56 
   1 -18   0   21.61    0.64 
   1 -18   0   21.17    0.61 
  -1 -18   0   21.55    0.58 
  -1 -18   0   21.24    0.55 
  -1  18   0   20.28    0.60 
  -1  18   0   20.85    0.51 
   1  18   0   20.72    0.63 
   1  18   0   19.94    0.49 
   1  18   0   20.39    0.60 
   1  18   0   21.20    0.67 
  -1  18   0   21.67    0.70 
  -2 -18   0   98.98    2.02 
   2 -18   0   95.45    2.01 
  -2 -18   0  100.51    2.09 
   2 -18   0   96.73    2.23 
   2 -18   0   93.87    2.03 
   2 -18   0   97.47    1.78 
   2 -18   0   96.84    2.19 
  -2 -18   0   94.55    2.03 
  -2 -18   0   96.19    1.77 
  -2 -18   0   98.38    2.08 
   2  18   0   95.79    1.79 
  -2  18   0   98.86    2.29 
  -2  18   0   96.16    2.03 
   2  18   0   97.33    2.19 
   2  18   0   96.54    2.22 
   2  18   0   94.38    2.04 
  -2  18   0   97.61    2.03 
   3 -18   0   68.64    1.65 
  -3 -18   0   68.98    1.32 
   3 -18   0   67.92    1.52 
   3 -18   0   68.64    1.32 
   3 -18   0   67.87    1.69 
  -3 -18   0   71.96    1.45 
   3 -18   0   69.31    1.51 
   3  18   0   67.00    1.35 
  -3  18   0   68.11    1.54 
   3  18   0   68.42    1.62 
   4 -18   0   18.91    0.49 
  -4 -18   0   18.03    0.49 
   4 -18   0   17.86    0.66 
   4 -18   0   17.50    0.63 
   4 -18   0   17.55    0.56 
   4 -18   0   17.26    0.58 
   4  18   0   17.21    0.52 
   4  18   0   17.85    0.62 
  -4  18   0   18.24    0.58 
   4  18   0   17.67    0.60 
  -4  18   0   18.22    0.58 
   5 -18   0   14.35    0.59 
   5 -18   0   15.01    0.55 
   5 -18   0   15.48    0.43 
  -5 -18   0   14.72    0.46 
   5 -18   0   14.38    0.63 
   5  18   0   14.90    0.52 
   5  18   0   15.01    0.57 
   5  18   0   14.74    0.59 
  -5  18   0   14.97    0.54 
  -5  18   0   15.54    0.65 
  -5  18   0   14.87    0.56 
   6 -18   0   24.07    0.88 
  -6 -18   0   23.22    0.65 
   6 -18   0   24.41    0.79 
   6 -18   0   25.58    0.67 
  -6  18   0   24.03    0.80 
   6  18   0   24.46    0.82 
   6  18   0   25.22    0.75 
  -6  18   0   26.02    0.90 
   6  18   0   24.27    0.80 
  -6  18   0   25.00    0.76 
   7 -18   0   62.78    1.38 
   7 -18   0   58.56    1.52 
   7 -18   0   57.10    1.64 
   7  18   0   58.71    1.37 
   7  18   0   57.25    1.51 
   7  18   0   56.86    1.53 
   8 -18   0    4.61    0.58 
   8 -18   0    4.53    0.52 
   8  18   0    4.74    0.47 
   8  18   0    4.47    0.59 
   8  18   0    4.50    0.56 
   0 -19   0    0.61    0.11 
   0 -19   0    0.09    0.10 
   0 -19   0    0.39    0.11 
   0  19   0    0.22    0.14 
   0  19   0    0.32    0.13 
   0  19   0    0.25    0.12 
  -1 -19   0  210.82    4.28 
   1 -19   0  212.92    4.51 
  -1 -19   0  214.86    4.43 
  -1 -19   0  213.89    4.41 
   1 -19   0  206.51    3.67 
   1 -19   0  203.52    4.12 
   1 -19   0  212.08    4.47 
  -1 -19   0  201.32    3.67 
   1 -19   0  209.57    4.15 
   1  19   0  205.56    3.66 
   1  19   0  213.28    4.56 
   1  19   0  211.96    4.51 
   1  19   0  204.87    4.13 
  -1  19   0  208.17    4.13 
  -1  19   0  211.56    4.59 
   2 -19   0    4.45    0.29 
   2 -19   0    5.16    0.31 
  -2 -19   0    4.94    0.23 
   2 -19   0    4.77    0.24 
   2 -19   0    4.63    0.23 
  -2 -19   0    5.06    0.22 
   2 -19   0    5.24    0.34 
  -2 -19   0    5.43    0.24 
  -2 -19   0    5.29    0.24 
  -2  19   0    4.43    0.29 
   2  19   0    4.92    0.26 
   2  19   0    4.94    0.33 
  -2  19   0    5.27    0.37 
  -2  19   0    4.78    0.25 
   2  19   0    4.72    0.34 
   2  19   0    4.83    0.31 
   3 -19   0   28.86    0.79 
   3 -19   0   28.41    0.83 
   3 -19   0   27.88    0.86 
   3 -19   0   28.60    0.74 
  -3 -19   0   29.24    0.66 
  -3 -19   0   30.37    0.67 
   3 -19   0   29.07    0.66 
   3  19   0   28.00    0.81 
   3  19   0   27.19    0.80 
  -3  19   0   28.08    0.75 
   3  19   0   28.58    0.69 
  -3  19   0   27.87    0.78 
   4 -19   0   -0.17    0.11 
  -4 -19   0    0.17    0.13 
   4 -19   0    0.32    0.18 
   4 -19   0    0.01    0.14 
   4 -19   0   -0.01    0.14 
   4  19   0    0.38    0.16 
  -4  19   0   -0.10    0.13 
   4  19   0    0.05    0.15 
   4  19   0    0.23    0.16 
  -4  19   0    0.41    0.15 
   5 -19   0   56.44    1.37 
   5 -19   0   56.58    1.38 
   5 -19   0   56.05    1.49 
   5 -19   0   57.51    1.54 
   5 -19   0   57.85    1.24 
   5  19   0   56.05    1.44 
   5  19   0   56.84    1.24 
  -5  19   0   57.08    1.35 
  -5  19   0   59.54    1.56 
  -5  19   0   57.00    1.39 
   5  19   0   56.17    1.41 
   6 -19   0    4.12    0.40 
  -6 -19   0    4.03    0.32 
   6 -19   0    4.99    0.29 
   6 -19   0    5.02    0.45 
   6  19   0    4.75    0.42 
  -6  19   0    4.35    0.41 
   6  19   0    3.89    0.43 
  -6  19   0    4.16    0.38 
   7 -19   0   13.86    0.72 
   7 -19   0   13.70    0.65 
   7 -19   0   15.47    0.55 
   7  19   0   13.67    0.65 
   7  19   0   14.92    0.70 
   7  19   0   13.95    0.68 
   8 -19   0    0.00    0.31 
   8 -19   0   -0.07    0.34 
   8  19   0    0.47    0.36 
   8  19   0   -0.09    0.33 
   8  19   0    0.23    0.30 
   0 -20   0   68.83    1.60 
   0 -20   0   71.51    1.63 
   0 -20   0   69.12    1.33 
   0  20   0   70.23    1.73 
   0  20   0   69.05    1.67 
  -1 -20   0    5.44    0.28 
   1 -20   0    5.30    0.30 
  -1 -20   0    5.63    0.27 
  -1 -20   0    5.17    0.25 
  -1 -20   0    5.30    0.24 
   1 -20   0    5.54    0.34 
   1 -20   0    5.56    0.22 
   1 -20   0    5.29    0.24 
   1  20   0    4.91    0.36 
   1  20   0    5.05    0.25 
  -1  20   0    4.73    0.37 
   1  20   0    5.18    0.33 
   2 -20   0  101.65    2.35 
   2 -20   0  100.82    2.11 
  -2 -20   0  105.51    2.20 
  -2 -20   0  100.40    1.87 
  -2 -20   0  102.95    2.18 
   2 -20   0  102.08    2.31 
   2 -20   0  102.77    1.88 
  -2 -20   0  101.96    2.13 
  -2  20   0  102.96    2.43 
   2  20   0  101.00    2.32 
  -2  20   0   99.57    2.14 
  -2  20   0  102.46    2.14 
   2  20   0   98.82    2.16 
   2  20   0   99.87    1.89 
   3 -20   0    8.60    0.43 
   3 -20   0    9.41    0.42 
   3 -20   0    8.91    0.36 
  -3 -20   0    9.35    0.34 
  -3 -20   0    9.86    0.31 
   3 -20   0    9.91    0.35 
   3 -20   0    9.27    0.48 
   3  20   0    9.78    0.45 
  -3  20   0    9.55    0.39 
   3  20   0    9.56    0.38 
  -3  20   0    9.32    0.42 
   3  20   0    9.22    0.43 
   4 -20   0   45.67    0.95 
   4 -20   0   43.74    1.11 
  -4 -20   0   42.71    0.94 
   4 -20   0   43.98    1.24 
   4 -20   0   42.84    1.08 
   4  20   0   44.04    1.16 
  -4  20   0   43.68    1.10 
   4  20   0   43.56    1.14 
  -4  20   0   44.87    1.11 
   5 -20   0    0.56    0.22 
   5 -20   0    0.33    0.18 
   5 -20   0    0.53    0.19 
   5 -20   0    0.49    0.20 
   5  20   0    0.30    0.19 
   5  20   0    0.53    0.20 
  -5  20   0    0.30    0.20 
  -5  20   0    0.15    0.17 
   5  20   0    0.27    0.20 
   6 -20   0   20.21    0.82 
  -6 -20   0   19.20    0.61 
   6 -20   0   20.04    0.57 
   6 -20   0   19.83    0.72 
   6  20   0   20.43    0.70 
   6  20   0   20.60    0.78 
  -6  20   0   21.07    0.75 
   6  20   0   20.45    0.75 
  -6  20   0   19.87    0.71 
   7 -20   0    6.64    0.58 
   7 -20   0    6.76    0.53 
   7  20   0    5.91    0.55 
   7  20   0    6.24    0.55 
   7  20   0    7.59    0.55 
   8  20   0    1.28    0.41 
   8  20   0    1.69    0.41 
   0 -21   0    0.38    0.12 
   0 -21   0    0.06    0.11 
   0 -21   0    0.15    0.14 
   0 -21   0    0.07    0.14 
   0  21   0    0.26    0.17 
   0  21   0    0.22    0.13 
   1 -21   0   16.12    0.42 
  -1 -21   0   16.77    0.51 
   1 -21   0   16.58    0.44 
   1 -21   0   16.36    0.58 
  -1 -21   0   15.43    0.43 
  -1 -21   0   16.69    0.49 
  -1 -21   0   16.23    0.49 
   1 -21   0   16.65    0.54 
   1  21   0   15.99    0.45 
   1  21   0   16.12    0.62 
  -1  21   0   15.21    0.63 
  -1  21   0   15.22    0.54 
   1  21   0   16.05    0.58 
   1  21   0   16.24    0.56 
   2 -21   0    6.47    0.39 
  -2 -21   0    5.94    0.28 
   2 -21   0    6.00    0.28 
  -2 -21   0    6.00    0.25 
   2 -21   0    6.01    0.28 
   2 -21   0    5.52    0.34 
  -2 -21   0    6.20    0.28 
  -2 -21   0    5.80    0.27 
   2  21   0    6.14    0.30 
   2  21   0    5.82    0.37 
  -2  21   0    5.54    0.35 
   2  21   0    6.36    0.37 
  -2  21   0    6.08    0.29 
  -2  21   0    6.44    0.44 
   3 -21   0   33.25    0.99 
   3 -21   0   34.31    0.76 
   3 -21   0   32.81    0.83 
  -3 -21   0   34.49    0.77 
  -3 -21   0   31.51    0.74 
   3 -21   0   33.16    0.90 
   3  21   0   32.24    0.78 
   3  21   0   32.87    0.94 
  -3  21   0   32.22    0.89 
   3  21   0   32.84    0.92 
  -3  21   0   32.62    0.85 
   4 -21   0   12.19    0.54 
   4 -21   0   11.93    0.52 
   4 -21   0   11.48    0.46 
   4 -21   0   11.65    0.58 
   4 -21   0   12.15    0.42 
  -4 -21   0   11.55    0.42 
  -4  21   0   11.60    0.50 
   4  21   0   12.09    0.54 
  -4  21   0   11.90    0.49 
   4  21   0   11.31    0.56 
   4  21   0   11.47    0.46 
  -5 -21   0   14.24    0.48 
   5 -21   0   12.53    0.54 
   5 -21   0   14.33    0.65 
  -5  21   0   13.18    0.58 
   5  21   0   12.86    0.61 
  -5  21   0   13.57    0.56 
   5  21   0   14.02    0.60 
   5  21   0   13.01    0.54 
   6 -21   0   71.62    1.50 
   6 -21   0   70.50    1.74 
   6 -21   0   72.87    1.93 
  -6  21   0   73.04    1.70 
  -6  21   0   75.15    1.88 
   6  21   0   71.47    1.82 
   6  21   0   70.62    1.57 
   6  21   0   71.21    1.78 
   7 -21   0    0.78    0.29 
   7 -21   0    0.99    0.32 
   7  21   0    0.65    0.31 
   7  21   0    1.09    0.35 
   7  21   0    0.58    0.29 
   0 -22   0    0.35    0.14 
   0 -22   0    0.71    0.17 
   0 -22   0    0.83    0.17 
   0 -22   0    0.84    0.14 
   0  22   0    0.68    0.16 
   0  22   0    0.79    0.22 
  -1 -22   0    7.16    0.34 
  -1 -22   0    6.79    0.33 
   1 -22   0    6.89    0.26 
   1 -22   0    7.10    0.30 
   1 -22   0    7.96    0.40 
  -1 -22   0    7.14    0.30 
   1 -22   0    7.31    0.37 
  -1 -22   0    7.17    0.31 
   1  22   0    6.95    0.31 
   1  22   0    7.32    0.40 
   1  22   0    7.34    0.46 
  -1  22   0    7.04    0.46 
  -1  22   0    7.09    0.39 
   1  22   0    6.94    0.40 
   2 -22   0   36.20    0.84 
  -2 -22   0   36.13    0.85 
  -2 -22   0   36.63    0.85 
  -2 -22   0   34.89    0.78 
  -2 -22   0   35.61    0.84 
   2 -22   0   35.15    0.78 
   2 -22   0   35.17    0.97 
  -2  22   0   33.99    0.94 
   2  22   0   35.15    0.96 
   2  22   0   34.09    0.80 
  -2  22   0   34.89    0.86 
  -2  22   0   35.58    1.09 
   3 -22   0    3.78    0.28 
   3 -22   0    3.68    0.28 
   3 -22   0    3.55    0.34 
  -3 -22   0    3.64    0.22 
  -3 -22   0    3.37    0.27 
   3 -22   0    3.50    0.38 
   3  22   0    3.70    0.36 
  -3  22   0    3.60    0.31 
   3  22   0    3.42    0.30 
  -3  22   0    2.75    0.32 
   3  22   0    4.22    0.38 
   4 -22   0   30.66    0.98 
   4 -22   0   29.05    0.83 
   4 -22   0   30.95    0.75 
   4 -22   0   29.50    0.94 
  -4  22   0   30.40    0.87 
   4  22   0   30.09    0.92 
  -4  22   0   30.01    0.87 
   4  22   0   29.71    0.92 
   4  22   0   31.24    0.80 
   5 -22   0   25.17    0.79 
   5 -22   0   25.81    0.92 
  -5 -22   0   25.46    0.69 
  -5  22   0   24.53    0.79 
  -5  22   0   26.16    0.82 
   5  22   0   24.45    0.87 
   5  22   0   24.52    0.85 
   5  22   0   25.28    0.75 
   6 -22   0    4.63    0.44 
   6 -22   0    4.37    0.45 
   6 -22   0    4.89    0.54 
  -6  22   0    4.57    0.44 
   6  22   0    5.91    0.54 
   6  22   0    4.92    0.43 
   6  22   0    5.33    0.53 
   7 -22   0   32.17    1.06 
   7 -22   0   31.24    1.16 
   7  22   0   32.05    1.10 
   7  22   0   31.65    1.11 
   7  22   0   31.26    1.00 
   0  23   0    0.74    0.23 
  -1 -23   0   41.79    1.02 
   1 -23   0   41.98    0.91 
   1 -23   0   41.79    1.11 
   1 -23   0   42.49    1.09 
   1 -23   0   42.10    0.89 
  -1 -23   0   42.24    1.04 
  -1 -23   0   40.58    0.89 
  -1 -23   0   42.68    1.05 
  -1  23   0   40.07    1.07 
   1  23   0   41.62    1.14 
   1  23   0   41.82    1.21 
   1  23   0   40.51    1.08 
  -1  23   0   41.61    1.23 
   2 -23   0    3.35    0.24 
   2 -23   0    3.32    0.33 
  -2 -23   0    3.32    0.26 
   2 -23   0    2.63    0.27 
   2 -23   0    4.07    0.37 
  -2 -23   0    3.63    0.22 
  -2 -23   0    3.66    0.26 
  -2 -23   0    3.93    0.24 
   2 -23   0    3.40    0.34 
   2  23   0    3.15    0.34 
  -2  23   0    3.36    0.34 
  -2  23   0    3.55    0.42 
   2  23   0    3.42    0.28 
   2  23   0    3.19    0.34 
   3 -23   0   55.74    1.28 
  -3 -23   0   54.70    1.15 
   3 -23   0   54.86    1.15 
   3 -23   0   55.30    1.48 
  -3 -23   0   59.18    1.22 
   3 -23   0   54.04    1.43 
   3  23   0   55.31    1.44 
   3  23   0   54.41    1.38 
  -3  23   0   53.64    1.34 
   3  23   0   53.89    1.18 
  -3  23   0   55.84    1.31 
   4 -23   0    3.01    0.42 
   4 -23   0    2.88    0.27 
   4 -23   0    2.93    0.33 
   4  23   0    2.63    0.32 
  -4  23   0    2.13    0.27 
  -4  23   0    2.81    0.31 
   4  23   0    2.71    0.29 
   4  23   0    2.08    0.28 
   5 -23   0   15.21    0.72 
  -5 -23   0   14.56    0.54 
   5 -23   0   14.09    0.60 
   5 -23   0   14.52    0.58 
  -5  23   0   14.47    0.64 
  -5  23   0   14.18    0.61 
   5  23   0   13.92    0.60 
   5  23   0   14.73    0.68 
   5  23   0   15.21    0.68 
   6 -23   0    3.33    0.38 
   6 -23   0    3.70    0.48 
   6 -23   0    3.28    0.42 
   6  23   0    3.78    0.42 
   6  23   0    3.88    0.42 
  -6  23   0    3.46    0.37 
   6  23   0    3.44    0.41 
   0 -24   0  214.70    4.52 
   0 -24   0  211.20    3.71 
   0 -24   0  200.93    4.36 
   0 -24   0  213.59    4.50 
   0  24   0  205.86    4.22 
   0  24   0  214.38    4.71 
   1 -24   0    1.17    0.19 
   1 -24   0    1.01    0.22 
   1 -24   0    1.18    0.21 
  -1 -24   0    1.26    0.19 
  -1 -24   0    1.52    0.21 
   1 -24   0    0.85    0.20 
   1 -24   0    1.50    0.17 
  -1 -24   0    1.35    0.19 
  -1 -24   0    0.68    0.19 
  -1  24   0    1.28    0.23 
   1  24   0    0.93    0.22 
   1  24   0    1.88    0.31 
   1  24   0    1.36    0.22 
  -1  24   0    0.78    0.26 
  -2 -24   0  109.16    2.31 
   2 -24   0  107.86    2.53 
   2 -24   0  109.44    2.26 
  -2 -24   0  109.22    2.33 
  -2 -24   0  113.93    2.34 
  -2 -24   0  105.90    2.03 
   2 -24   0  108.19    2.03 
   2  24   0  107.88    2.54 
  -2  24   0  106.58    2.35 
   2  24   0  109.27    2.38 
  -3 -24   0    0.59    0.15 
   3 -24   0    0.66    0.26 
   3 -24   0    0.66    0.20 
   3 -24   0    0.56    0.23 
   3 -24   0    0.83    0.18 
  -3  24   0    0.57    0.21 
   3  24   0    0.67    0.24 
   3  24   0    0.54    0.23 
   3  24   0    0.68    0.20 
  -3  24   0    0.53    0.20 
  -4 -24   0   61.21    1.32 
   4 -24   0   66.56    1.72 
  -4  24   0   64.13    1.54 
   4  24   0   66.02    1.67 
   4  24   0   63.34    1.60 
   4  24   0   64.07    1.38 
  -4  24   0   64.45    1.55 
   5 -24   0   -0.14    0.23 
   5 -24   0    0.72    0.28 
   5 -24   0    0.53    0.27 
   5  24   0    0.18    0.28 
  -5  24   0    0.39    0.23 
  -5  24   0   -0.08    0.30 
   5  24   0    0.55    0.27 
   5  24   0   -0.03    0.27 
   6 -24   0   28.62    1.07 
   6 -24   0   28.04    0.94 
   6  24   0   27.79    1.03 
   6  24   0   27.09    0.90 
   6  24   0   28.26    1.03 
  -6  24   0   28.31    0.93 
   0 -25   0    0.79    0.22 
   0 -25   0    0.37    0.17 
   0 -25   0    0.42    0.19 
   0 -25   0    0.57    0.17 
   0  25   0    0.08    0.26 
   0  25   0    0.51    0.20 
  -1 -25   0   60.97    1.24 
  -1 -25   0   63.43    1.44 
   1 -25   0   60.21    1.24 
  -1 -25   0   61.61    1.42 
   1 -25   0   60.54    1.27 
   1 -25   0   60.35    1.50 
   1  25   0   60.76    1.66 
   1  25   0   60.04    1.57 
  -1  25   0   61.02    1.48 
   1  25   0   60.38    1.48 
   2 -25   0   13.71    0.62 
  -2 -25   0   14.16    0.48 
  -2 -25   0   14.06    0.42 
  -2 -25   0   14.11    0.43 
  -2 -25   0   13.07    0.47 
   2 -25   0   13.95    0.45 
   2 -25   0   14.41    0.62 
   2 -25   0   14.31    0.49 
  -2  25   0   13.13    0.59 
   2  25   0   15.11    0.63 
   2  25   0   13.56    0.40 
   2  25   0   14.36    0.50 
   2  25   0   13.63    0.62 
   3 -25   0   42.72    1.23 
   3 -25   0   44.61    1.07 
   3 -25   0   43.63    1.26 
  -3 -25   0   44.65    1.01 
   3 -25   0   44.02    0.99 
   3  25   0   43.57    1.20 
   3  25   0   42.71    1.03 
   3  25   0   45.13    1.26 
  -3  25   0   42.52    1.16 
   3  25   0   43.17    1.01 
  -4 -25   0   14.74    0.55 
   4 -25   0   16.08    0.72 
   4 -25   0   15.04    0.60 
   4  25   0   15.77    0.70 
  -4  25   0   15.38    0.65 
  -4  25   0   14.66    0.64 
   4  25   0   15.38    0.60 
   4  25   0   15.38    0.71 
   5 -25   0   12.87    0.73 
   5 -25   0   11.60    0.58 
   5 -25   0   12.49    0.60 
   5  25   0   12.06    0.68 
  -5  25   0   10.84    0.60 
   5  25   0   11.36    0.60 
   5  25   0   11.42    0.67 
  -5  25   0   12.31    0.68 
   0 -26   0    0.80    0.21 
   0 -26   0    0.86    0.20 
   0 -26   0    0.95    0.24 
   0 -26   0    0.62    0.21 
   0  26   0    0.65    0.24 
   1 -26   0    1.66    0.22 
  -1 -26   0    1.64    0.21 
  -1 -26   0    1.57    0.21 
   1 -26   0    1.49    0.26 
   1 -26   0    1.45    0.28 
   1 -26   0    0.87    0.22 
  -1 -26   0    1.79    0.23 
  -1 -26   0    1.48    0.24 
   1  26   0    1.48    0.27 
   1  26   0    1.56    0.25 
  -1  26   0    1.50    0.26 
   2 -26   0   13.92    0.51 
   2 -26   0   14.57    0.47 
   2 -26   0   14.76    0.64 
   2 -26   0   14.36    0.64 
  -2 -26   0   14.32    0.50 
  -2 -26   0   14.39    0.43 
   2  26   0   13.89    0.64 
  -2  26   0   13.06    0.61 
   2  26   0   15.08    0.67 
   2  26   0   14.62    0.53 
   3 -26   0   11.61    0.48 
  -3 -26   0   11.58    0.41 
   3 -26   0   12.12    0.63 
  -3 -26   0   11.37    0.49 
   3  26   0   11.36    0.61 
  -3  26   0   10.82    0.57 
   3  26   0   11.82    0.63 
   3  26   0   11.72    0.51 
   4 -26   0    4.36    0.45 
   4 -26   0    5.12    0.54 
   4 -26   0    4.13    0.41 
   4  26   0    5.00    0.48 
   4  26   0    4.61    0.51 
   4  26   0    4.81    0.53 
  -4  26   0    3.87    0.45 
  -4  26   0    4.01    0.49 
   5 -26   0   10.30    0.70 
   5 -26   0    9.62    0.57 
  -5  26   0    9.96    0.60 
   5  26   0    9.47    0.62 
   5  26   0   10.16    0.68 
   5  26   0    9.70    0.68 
   0 -27   0    0.57    0.22 
   0 -27   0    0.08    0.20 
   0  27   0    0.02    0.21 
   1 -27   0    4.42    0.46 
  -1 -27   0    4.59    0.36 
  -1 -27   0    4.88    0.36 
  -1 -27   0    4.44    0.39 
   1 -27   0    5.24    0.45 
  -1  27   0    4.71    0.45 
   1  27   0    5.43    0.46 
  -2 -27   0    2.70    0.29 
   2 -27   0    3.24    0.45 
   2 -27   0    2.78    0.29 
   2 -27   0    3.73    0.47 
  -2 -27   0    3.18    0.34 
   2  27   0    2.41    0.34 
  -2  27   0    2.41    0.32 
   2  27   0    3.05    0.36 
   3 -27   0    5.67    0.53 
   3 -27   0    5.46    0.45 
   3 -27   0    6.09    0.40 
  -3 -27   0    6.20    0.45 
  -3  27   0    4.95    0.49 
   3  27   0    6.04    0.53 
   3  27   0    5.83    0.46 
   3  27   0    6.41    0.55 
   4 -27   0   13.94    0.75 
   4 -27   0   13.20    0.59 
   4 -27   0   13.84    0.64 
   4  27   0   12.78    0.61 
   4  27   0   13.39    0.74 
   4  27   0   13.90    0.72 
  -4  27   0   13.01    0.65 
   0 -28   0   32.42    0.93 
   0 -28   0   30.65    0.94 
   0 -28   0   32.51    0.94 
   0  28   0   30.06    0.98 
   1 -28   0    0.88    0.28 
   1 -28   0    0.47    0.28 
  -1 -28   0   -0.13    0.24 
  -1 -28   0    0.68    0.21 
  -1 -28   0    0.70    0.25 
   1  28   0    1.07    0.28 
  -1  28   0    0.69    0.25 
  -2 -28   0   58.15    1.37 
   2 -28   0   59.18    1.57 
   2 -28   0   56.82    1.28 
  -2 -28   0   57.78    1.26 
   2  28   0   61.91    1.63 
  -2  28   0   56.00    1.49 
   2  28   0   60.05    1.54 
   3 -28   0    0.59    0.33 
   3  28   0    0.39    0.28 
   3  28   0    0.88    0.32 
  -3  28   0   -0.12    0.26 
   3  28   0    0.48    0.32 
   4  28   0   35.36    1.19 
   0 -29   0    0.39    0.26 
   0 -29   0    0.61    0.29 
   0 -29   0    0.70    0.30 
   0  29   0    0.33    0.27 
   1 -29   0   52.18    1.39 
   1 -29   0   53.62    1.41 
  -1 -29   0   51.30    1.18 
  -1 -29   0   52.86    1.31 
  -1  29   0   51.11    1.39 
   1  29   0   51.64    1.41 
   2 -29   0    0.23    0.33 
   2 -29   0    0.27    0.31 
   2  29   0    0.68    0.30 
  -2  29   0    0.23    0.28 
   0 -30   0   63.11    1.59 
   1 -30   0    5.53    0.60 
   1 -30   0    5.28    0.57 
  10   0  -1    0.58    0.32 
  10   0  -1   -0.34    0.27 
  10   0  -1    0.04    0.34 
   9   0  -1   51.17    1.46 
   9   0  -1   51.43    1.39 
  -9   0   1   53.40    1.23 
   9   0  -1   53.00    1.24 
   8   0  -1    0.14    0.19 
   8   0  -1   -0.02    0.20 
   8   0  -1    0.50    0.20 
  -8   0   1   -0.14    0.13 
  -7   0   1   57.98    1.31 
   7   0  -1   54.79    1.35 
  -7   0   1   54.99    1.31 
   7   0  -1   56.84    1.42 
   7   0  -1   56.11    1.20 
   6   0  -1   -0.13    0.11 
   6   0  -1    0.05    0.11 
  -6   0   1    0.17    0.09 
  -6   0   1    0.04    0.09 
   6   0  -1    0.41    0.12 
   5   0  -1  375.37    7.96 
  -5   0   1  373.97    7.53 
   5   0  -1  377.84    7.56 
   5   0  -1  382.59    6.55 
  -5   0   1  398.88    7.96 
   4   0  -1   -0.05    0.07 
   4   0  -1    0.15    0.07 
   4   0  -1    0.04    0.06 
  -4   0   1    0.12    0.06 
  -4   0   1    0.06    0.06 
   3   0  -1   16.93    0.43 
  -3   0   1   18.04    0.44 
   3   0  -1   16.91    0.45 
  -3   0   1   16.70    0.42 
  -2   0   1    0.03    0.03 
   2   0  -1    0.01    0.03 
  -2   0   1    0.04    0.03 
  -2   0   1    0.04    0.03 
  -1   0   1    1.26    0.05 
  -1   0   1    1.21    0.06 
  -1   0   1    1.32    0.06 
   1   0  -1    1.28    0.06 
   1   0   1   18.40    0.42 
  -1   0  -1   18.87    0.42 
   1   0   1   19.85    0.41 
  -1   0  -1   19.80    0.41 
  -2   0  -1    0.14    0.03 
  -2   0  -1    0.22    0.04 
   2   0   1    0.18    0.04 
   2   0   1    0.19    0.04 
  -3   0  -1    0.89    0.07 
   3   0   1    0.76    0.09 
  -3   0  -1    1.09    0.09 
   3   0   1    1.04    0.10 
  -4   0  -1    0.06    0.05 
   4   0   1    0.05    0.07 
  -4   0  -1    0.16    0.06 
   4   0   1   -0.03    0.06 
  -5   0  -1   99.61    2.01 
   5   0   1   92.51    2.09 
   5   0   1   92.99    2.01 
  -5   0  -1   93.47    1.99 
   5   0   1   94.14    1.76 
  -6   0  -1    0.07    0.10 
   6   0   1    0.06    0.10 
   6   0   1    0.63    0.14 
  -6   0  -1   -0.04    0.07 
   6   0   1   -0.04    0.11 
   7   0   1   40.26    1.05 
  -7   0  -1   42.25    0.91 
  -7   0  -1   40.17    1.02 
   7   0   1   39.03    1.08 
   7   0   1   41.52    1.06 
   8   0   1    0.13    0.17 
   8   0   1    0.16    0.19 
   8   0   1    0.16    0.18 
   8   0   1    0.42    0.18 
   9   0   1   11.34    0.55 
   9   0   1   11.48    0.63 
   9   0   1   12.63    0.60 
  10   0   1    0.03    0.35 
  10   0   1   -0.05    0.27 
  10   0   1    0.67    0.31 
  10  -1  -1   29.57    1.10 
  10  -1  -1   31.02    1.06 
  10  -1  -1   29.44    0.93 
  10   1  -1   29.16    0.93 
  10   1  -1   29.61    1.04 
  10   1  -1   30.83    1.11 
   9  -1  -1    0.51    0.24 
  -9  -1   1    0.37    0.15 
   9  -1  -1    0.10    0.20 
   9  -1  -1    0.37    0.26 
  -9  -1   1    0.24    0.21 
   9   1  -1    0.38    0.23 
   9   1  -1    0.56    0.24 
  -9   1   1    0.17    0.17 
   9   1  -1    0.30    0.25 
  -8  -1   1  121.56    2.57 
   8  -1  -1  118.72    2.63 
   8  -1  -1  118.89    2.29 
   8  -1  -1  114.57    2.75 
   8   1  -1  115.40    2.29 
  -8   1   1  122.93    2.60 
   8   1  -1  115.57    2.61 
   7  -1  -1    0.11    0.13 
   7  -1  -1    0.33    0.14 
  -7  -1   1    0.24    0.13 
   7  -1  -1    0.10    0.15 
  -7  -1   1   -0.06    0.11 
  -7   1   1    0.01    0.11 
  -7   1   1    0.34    0.14 
   7   1  -1    0.17    0.14 
   7   1  -1    0.27    0.15 
   7   1  -1    0.28    0.16 
   6  -1  -1  138.53    3.10 
   6  -1  -1  140.04    2.57 
  -6  -1   1  146.41    3.01 
   6  -1  -1  139.06    2.95 
  -6  -1   1  136.01    2.90 
  -6   1   1  146.62    3.03 
   6   1  -1  140.75    2.94 
  -6   1   1  137.30    2.91 
   6   1  -1  140.68    2.57 
   6   1  -1  140.02    3.09 
  -5  -1   1    9.78    0.32 
   5  -1  -1    8.93    0.36 
   5  -1  -1   10.00    0.32 
  -5  -1   1    9.59    0.32 
   5  -1  -1    9.39    0.34 
   5   1  -1    9.43    0.34 
   5   1  -1    9.41    0.36 
  -5   1   1    9.73    0.33 
  -5   1   1   10.06    0.34 
   5   1  -1    9.47    0.32 
   4  -1  -1  187.30    4.01 
  -4  -1   1  198.25    3.97 
   4  -1  -1  187.55    3.81 
  -4  -1   1  183.81    3.78 
   4  -1  -1  189.84    3.30 
   4   1  -1  185.63    3.80 
  -4   1   1  187.04    3.79 
  -4   1   1  197.79    3.99 
   4   1  -1  189.85    4.00 
   3  -1  -1   20.20    0.51 
  -3  -1   1   21.53    0.44 
   3  -1  -1   21.72    0.45 
  -3  -1   1   22.47    0.52 
   3  -1  -1   21.41    0.54 
  -3  -1   1   21.08    0.50 
   3   1  -1   21.25    0.53 
   3   1  -1   21.22    0.45 
   3   1  -1   21.30    0.51 
  -3   1   1   21.82    0.53 
  -3   1   1   21.04    0.50 
  -2  -1   1  162.56    3.37 
   2  -1  -1  156.83    2.74 
  -2  -1   1  156.63    2.75 
  -2  -1   1  152.66    3.14 
   2  -1  -1  154.78    3.22 
   2  -1  -1  154.66    3.27 
   2   1  -1  157.51    2.75 
   2   1  -1  159.78    3.40 
  -2   1   1  155.74    3.27 
   2   1  -1  157.27    3.23 
  -1  -1   1  241.19    4.86 
  -1  -1   1  240.44    4.21 
  -1  -1   1  250.84    5.14 
   1  -1  -1  241.74    4.91 
   1  -1  -1  238.37    5.16 
   1   1  -1  237.53    4.90 
  -1   1   1  238.70    4.19 
  -1   1   1  238.00    5.13 
   1   1  -1  256.20    5.18 
  -1   1   1  246.62    4.93 
   1   1  -1  236.47    4.24 
  -1  -1  -1  217.64    4.33 
   1  -1   1  202.67    4.33 
  -1   1  -1  219.54    4.52 
   1   1   1  217.48    4.33 
  -1   1  -1  211.85    4.41 
   1   1   1  212.61    4.41 
   2  -1   1    1.05    0.08 
  -2  -1  -1    0.80    0.07 
  -2   1  -1    0.85    0.06 
   2   1   1    0.95    0.07 
   2   1   1    0.82    0.07 
  -3  -1  -1  124.23    2.49 
  -3  -1  -1  129.89    2.55 
   3  -1   1  120.60    2.50 
   3  -1   1  118.04    2.61 
   3   1   1  120.62    2.60 
  -3   1  -1  127.93    2.59 
   3   1   1  122.10    2.49 
  -3   1  -1  122.87    2.50 
   3   1   1  125.39    2.17 
   4  -1   1   89.04    1.61 
  -4  -1  -1   92.42    1.84 
   4  -1   1   86.13    1.92 
   4  -1   1   85.57    1.84 
  -4  -1  -1   86.74    1.82 
  -4   1  -1   92.65    1.88 
   4   1   1   84.62    1.83 
   4   1   1   85.56    1.90 
   4   1   1   87.74    1.61 
  -4   1  -1   86.23    1.83 
   5  -1   1   36.88    0.78 
   5  -1   1   34.57    0.88 
   5  -1   1   34.42    0.91 
  -5  -1  -1   38.53    0.81 
  -5  -1  -1   36.50    0.86 
   5   1   1   36.83    0.79 
  -5   1  -1   37.86    0.84 
   5   1   1   35.68    0.90 
   5   1   1   35.80    0.88 
  -5   1  -1   36.09    0.87 
   6  -1   1   30.33    0.86 
   6  -1   1   31.99    0.75 
  -6  -1  -1   32.35    0.81 
   6  -1   1   30.99    0.84 
  -6   1  -1   31.99    0.81 
  -6   1  -1   33.49    0.76 
   6   1   1   30.38    0.85 
   6   1   1   31.44    0.75 
   6   1   1   32.54    0.84 
  -7  -1  -1   47.90    1.15 
   7  -1   1   45.55    1.22 
   7  -1   1   45.86    1.18 
   7  -1   1   49.17    1.19 
  -7   1  -1   47.40    1.15 
   7   1   1   47.50    1.19 
   7   1   1   45.86    1.21 
  -7   1  -1   49.27    1.07 
   8  -1   1   36.05    0.96 
   8  -1   1   37.40    1.02 
   8  -1   1   35.96    0.91 
   8  -1   1   35.43    1.02 
   8   1   1   36.03    1.02 
   8   1   1   35.99    0.92 
   8   1   1   35.07    1.05 
   8   1   1   38.12    1.03 
   9  -1   1    0.26    0.24 
   9  -1   1    0.56    0.26 
   9  -1   1    0.53    0.23 
   9   1   1    0.67    0.26 
   9   1   1    0.36    0.22 
   9   1   1    0.32    0.25 
  10  -1   1   32.54    0.99 
  10  -1   1   30.71    1.13 
  10  -1   1   33.57    1.10 
  10   1   1   30.91    1.13 
  10   1   1   30.61    0.97 
  10   1   1   33.81    1.09 
  10  -2  -1    2.35    0.39 
  10  -2  -1    1.90    0.31 
  10  -2  -1    1.90    0.40 
  10   2  -1    2.08    0.34 
  10   2  -1    1.79    0.38 
  10   2  -1    1.96    0.40 
   9  -2  -1    1.88    0.33 
   9  -2  -1    2.52    0.33 
  -9  -2   1    2.51    0.29 
   9  -2  -1    2.49    0.29 
   9   2  -1    2.06    0.33 
   9   2  -1    3.19    0.41 
   9   2  -1    2.74    0.34 
   8  -2  -1    0.33    0.18 
  -8  -2   1   -0.03    0.12 
   8  -2  -1    0.28    0.22 
   8  -2  -1    0.35    0.17 
   8  -2  -1    0.29    0.18 
   8   2  -1    0.05    0.17 
   8   2  -1    0.11    0.19 
   7  -2  -1   25.59    0.67 
   7  -2  -1   25.32    0.72 
  -7  -2   1   25.42    0.71 
   7  -2  -1   25.87    0.81 
   7  -2  -1   25.04    0.76 
  -7  -2   1   26.19    0.67 
   7   2  -1   26.32    0.69 
   7   2  -1   26.26    0.80 
  -7   2   1   27.03    0.72 
  -7   2   1   25.95    0.73 
   7   2  -1   26.14    0.76 
   6  -2  -1   23.30    0.71 
   6  -2  -1   23.75    0.68 
  -6  -2   1   24.25    0.61 
   6  -2  -1   23.67    0.59 
  -6  -2   1   22.99    0.63 
  -6   2   1   24.51    0.66 
   6   2  -1   23.68    0.60 
   6   2  -1   23.34    0.69 
  -6   2   1   22.53    0.64 
   6   2  -1   23.30    0.66 
  -5  -2   1    0.53    0.09 
   5  -2  -1    0.35    0.09 
   5  -2  -1    0.52    0.12 
  -5  -2   1    0.78    0.11 
   5  -2  -1    0.42    0.11 
   5   2  -1    0.36    0.09 
  -5   2   1    0.45    0.09 
   5   2  -1    0.39    0.11 
  -5   2   1    0.57    0.10 
   5   2  -1    0.49    0.11 
  -4  -2   1  108.89    1.96 
  -4  -2   1  108.37    2.24 
  -4  -2   1  113.21    2.34 
   4  -2  -1  107.91    2.40 
   4  -2  -1  112.96    1.97 
   4   2  -1  108.38    2.26 
  -4   2   1  107.24    2.26 
  -4   2   1  113.77    2.38 
   4   2  -1  108.74    2.38 
   4   2  -1  111.01    1.98 
  -3  -2   1   16.68    0.41 
   3  -2  -1   16.34    0.44 
  -3  -2   1   15.94    0.40 
   3  -2  -1   16.58    0.36 
  -3  -2   1   16.36    0.36 
  -3   2   1   15.56    0.41 
  -3   2   1   16.71    0.43 
   3   2  -1   16.70    0.41 
   3   2  -1   16.26    0.43 
  -2  -2   1   75.33    1.53 
   2  -2  -1   73.71    1.54 
   2  -2  -1   74.36    1.48 
  -2  -2   1   78.01    1.61 
  -2  -2   1   77.28    1.33 
   2  -2  -1   78.19    1.33 
   2  -2  -1   76.06    1.63 
   2   2  -1   74.64    1.53 
  -2   2   1   76.29    1.63 
   2   2  -1   77.29    1.34 
   2   2  -1   76.45    1.62 
  -2   2   1   74.09    1.54 
  -1  -2   1    1.43    0.06 
   1  -2  -1    1.47    0.07 
  -1  -2   1    1.43    0.06 
   1  -2  -1    1.47    0.06 
  -1  -2   1    1.47    0.06 
   1   2  -1    1.39    0.07 
  -1   2   1    1.46    0.06 
   0  -2   1  461.85    8.78 
   0  -2   1  451.47    9.72 
   0   2   1  483.65    9.40 
  -1  -2  -1   14.88    0.32 
   1  -2   1   14.36    0.33 
   1  -2   1   14.88    0.35 
   1  -2   1   14.51    0.31 
   1  -2   1   14.61    0.33 
  -1   2  -1   14.58    0.34 
   1   2   1   14.62    0.33 
  -1   2  -1   13.94    0.33 
  -1   2  -1   14.26    0.33 
  -1   2  -1   14.37    0.31 
   1   2   1   15.11    0.33 
   1   2   1   15.12    0.28 
   2  -2   1  291.11    6.29 
   2  -2   1  309.19    5.97 
   2  -2   1  312.06    6.35 
   2  -2   1  311.52    6.61 
  -2  -2  -1  304.61    6.21 
   2   2   1  313.86    6.32 
   2   2   1  312.98    6.46 
  -2   2  -1  306.15    6.31 
   2   2   1  318.60    5.51 
  -2   2  -1  323.66    6.64 
   3  -2   1  122.78    2.69 
  -3  -2  -1  125.82    2.55 
   3  -2   1  126.03    2.59 
   3  -2   1  125.98    2.57 
   3   2   1  125.17    2.55 
   3   2   1  130.21    2.23 
  -3   2  -1  133.53    2.68 
  -3   2  -1  127.12    2.57 
   3   2   1  125.77    2.66 
   4  -2   1  267.48    5.38 
   4  -2   1  261.25    5.65 
  -4  -2  -1  270.58    5.35 
  -4   2  -1  284.36    5.62 
   4   2   1  266.61    5.36 
   4   2   1  274.43    4.66 
  -4   2  -1  268.99    5.37 
   4   2   1  268.70    5.71 
   5  -2   1    0.34    0.09 
   5  -2   1    0.30    0.10 
  -5  -2  -1    0.33    0.09 
   5  -2   1    0.45    0.11 
  -5   2  -1    0.44    0.10 
  -5   2  -1    0.49    0.09 
   5   2   1    0.33    0.10 
   5   2   1    0.23    0.09 
   5   2   1    0.16    0.10 
   6  -2   1  146.82    3.08 
   6  -2   1  147.22    2.68 
  -6  -2  -1  145.43    3.03 
   6  -2   1  143.17    3.22 
   6  -2   1  148.99    3.10 
  -6   2  -1  154.12    3.13 
  -6   2  -1  145.04    3.05 
   6   2   1  145.52    3.19 
   6   2   1  144.61    3.06 
   6   2   1  147.93    2.69 
   7  -2   1    4.07    0.33 
   7  -2   1    3.82    0.31 
  -7  -2  -1    3.88    0.28 
   7  -2   1    3.92    0.28 
   7  -2   1    3.65    0.28 
   7   2   1    4.14    0.31 
   7   2   1    3.45    0.31 
  -7   2  -1    3.66    0.22 
  -7   2  -1    3.96    0.28 
   8  -2   1   52.21    1.36 
   8  -2   1   55.63    1.39 
   8  -2   1   56.21    1.30 
   8  -2   1   54.02    1.21 
   8   2   1   53.84    1.22 
   8   2   1   53.54    1.36 
   8   2   1   52.61    1.40 
  -8   2  -1   48.63    1.31 
  -8   2  -1   55.77    1.21 
   9  -2   1    1.35    0.26 
  -9  -2  -1    1.13    0.26 
   9  -2   1    1.13    0.29 
   9  -2   1    1.59    0.31 
   9   2   1    1.33    0.29 
   9   2   1    1.46    0.31 
   9   2   1    1.52    0.28 
  10  -2   1   12.04    0.76 
  10  -2   1   10.70    0.66 
  10  -2   1   11.03    0.63 
  10   2   1   11.92    0.65 
  10   2   1   10.40    0.72 
  10   2   1   11.71    0.67 
  10  -3  -1    9.21    0.57 
  10  -3  -1    8.38    0.68 
  10  -3  -1   10.07    0.65 
  10   3  -1    8.80    0.61 
  10   3  -1    8.41    0.63 
  10   3  -1    9.96    0.69 
  -9  -3   1    0.43    0.21 
   9  -3  -1    0.05    0.24 
   9  -3  -1    0.23    0.22 
   9  -3  -1   -0.09    0.23 
   9   3  -1   -0.25    0.24 
   9   3  -1    0.03    0.22 
  -9   3   1   -0.22    0.18 
   9   3  -1    0.08    0.21 
   8  -3  -1    7.90    0.41 
   8  -3  -1    7.55    0.44 
   8  -3  -1    7.59    0.49 
   8  -3  -1    8.44    0.40 
  -8  -3   1    7.49    0.39 
  -8  -3   1    8.23    0.30 
   8   3  -1    7.88    0.45 
  -8   3   1    8.02    0.39 
   8   3  -1    8.53    0.43 
  -8   3   1    7.22    0.40 
  -7  -3   1   11.21    0.36 
   7  -3  -1   11.38    0.48 
   7  -3  -1   11.73    0.43 
   7  -3  -1   11.54    0.51 
   7  -3  -1   12.00    0.44 
  -7  -3   1   11.55    0.42 
  -7   3   1   11.27    0.44 
   7   3  -1   11.33    0.46 
   7   3  -1   12.05    0.47 
   7   3  -1   11.52    0.49 
  -6  -3   1    6.62    0.25 
   6  -3  -1    6.62    0.29 
  -6  -3   1    6.11    0.28 
   6  -3  -1    6.00    0.34 
   6  -3  -1    5.97    0.32 
   6  -3  -1    6.16    0.30 
  -6   3   1    6.88    0.31 
   6   3  -1    6.04    0.29 
   6   3  -1    6.18    0.33 
   6   3  -1    6.25    0.31 
  -6   3   1    6.00    0.29 
  -5  -3   1   37.25    0.81 
   5  -3  -1   39.63    0.95 
   5  -3  -1   40.94    0.92 
   5  -3  -1   38.73    1.00 
  -5  -3   1   39.08    0.90 
  -5  -3   1   41.39    0.92 
   5  -3  -1   40.88    0.83 
   5   3  -1   38.94    0.98 
   5   3  -1   39.06    0.84 
   5   3  -1   39.44    0.93 
  -5   3   1   41.18    0.97 
  -5   3   1   38.48    0.93 
  -4  -3   1   11.52    0.32 
   4  -3  -1   11.17    0.30 
  -4  -3   1   10.98    0.32 
  -4  -3   1   10.94    0.30 
   4  -3  -1   11.33    0.34 
   4  -3  -1   11.08    0.37 
  -4   3   1   11.06    0.34 
  -4   3   1   11.30    0.36 
   4   3  -1   11.19    0.31 
   4   3  -1   11.28    0.35 
   4   3  -1   11.16    0.34 
  -3  -3   1    9.99    0.27 
   3  -3  -1    9.30    0.31 
   3  -3  -1    9.44    0.27 
   3  -3  -1    9.71    0.25 
  -3  -3   1    9.48    0.25 
   3  -3  -1    9.81    0.29 
  -3  -3   1    9.43    0.26 
   3   3  -1    9.52    0.29 
  -3   3   1    9.83    0.30 
   3   3  -1    9.44    0.27 
  -2  -3   1   19.01    0.42 
  -2  -3   1   17.90    0.38 
  -2  -3   1   19.79    0.45 
   2  -3  -1   18.82    0.48 
   2   3  -1   19.64    0.46 
  -2   3   1   19.31    0.45 
   2   3  -1   18.75    0.43 
   2   3  -1   19.91    0.39 
  -2   3   1   20.32    0.48 
  -1  -3   1   38.24    0.67 
  -1  -3   1   36.79    0.81 
   1  -3  -1   36.81    0.77 
  -1  -3   1   37.50    0.75 
   1  -3  -1   38.89    0.74 
   1  -3  -1   36.12    0.82 
  -1   3   1   36.27    0.77 
   1   3  -1   38.26    0.81 
   1   3  -1   39.27    0.67 
  -1   3   1   36.24    0.74 
  -1   3   1   37.41    0.82 
   0  -3   1    0.50    0.04 
   0  -3  -1    0.58    0.02 
   0  -3  -1    0.57    0.03 
   0  -3   1    0.57    0.04 
   0  -3   1    0.53    0.05 
   0  -3  -1    0.57    0.04 
   0  -3  -1    0.58    0.03 
   0  -3  -1    0.54    0.03 
   0   3   1    0.64    0.04 
   0   3  -1    0.56    0.04 
   0   3   1    0.60    0.03 
   0   3   1    0.58    0.02 
   0   3   1    0.57    0.03 
   0   3  -1    0.57    0.04 
   0   3   1    0.55    0.03 
   0   3  -1    0.73    0.04 
   1  -3   1  254.29    5.23 
   1  -3   1  258.99    5.64 
   1  -3   1  263.46    5.01 
   1  -3   1  263.15    5.33 
  -1  -3  -1  272.67    5.34 
  -1  -3  -1  253.11    4.51 
  -1   3  -1  263.08    5.05 
  -1   3  -1  248.90    5.25 
   1   3   1  259.50    4.54 
   1   3   1  278.92    5.37 
   1   3   1  266.43    5.06 
  -1   3  -1  258.10    5.30 
  -1   3  -1  261.93    5.61 
   1   3   1  249.77    5.22 
   2  -3   1    0.99    0.09 
  -2  -3  -1    0.66    0.06 
   2  -3   1    0.84    0.08 
   2  -3   1    0.90    0.07 
  -2  -3  -1    0.68    0.06 
   2  -3   1    0.65    0.07 
  -2   3  -1    0.79    0.08 
   2   3   1    0.72    0.04 
   2   3   1    0.66    0.06 
   2   3   1    0.65    0.06 
   3  -3   1  115.89    2.24 
   3  -3   1  112.95    2.36 
   3  -3   1  114.89    2.48 
  -3  -3  -1  114.42    2.32 
   3  -3   1  112.68    2.37 
  -3   3  -1  113.40    2.35 
   3   3   1  112.78    2.42 
   3   3   1  118.27    2.34 
  -3   3  -1  121.94    2.46 
   3   3   1  119.01    2.04 
   4  -3   1   13.47    0.40 
   4  -3   1   13.09    0.37 
  -4  -3  -1   13.01    0.36 
   4  -3   1   12.91    0.38 
   4  -3   1   12.56    0.41 
   4   3   1   12.49    0.35 
   4   3   1   12.99    0.37 
  -4   3  -1   13.20    0.39 
   4   3   1   12.94    0.38 
  -4   3  -1   13.63    0.38 
  -5  -3  -1  112.53    2.33 
   5  -3   1  112.04    2.38 
   5  -3   1  109.13    2.37 
   5  -3   1  109.40    2.48 
   5  -3   1  113.18    2.26 
   5   3   1  112.33    2.44 
  -5   3  -1  120.03    2.43 
   5   3   1  110.66    2.35 
   5   3   1  113.23    2.07 
   6  -3   1    4.42    0.30 
  -6  -3  -1    4.97    0.26 
   6  -3   1    4.81    0.27 
   6  -3   1    5.08    0.27 
   6  -3   1    4.42    0.26 
   6  -3   1    4.93    0.29 
   6   3   1    4.99    0.29 
  -6   3  -1    5.14    0.28 
  -6   3  -1    4.59    0.24 
   6   3   1    4.50    0.29 
   7  -3   1   51.56    1.26 
   7  -3   1   52.26    1.21 
   7  -3   1   50.34    1.33 
  -7  -3  -1   51.23    1.22 
   7   3   1   52.15    1.26 
   7   3   1   51.81    1.30 
  -7   3  -1   50.73    1.25 
   7   3   1   49.84    1.18 
  -7   3  -1   54.91    1.21 
   8  -3   1   14.06    0.52 
   8  -3   1   12.36    0.55 
   8  -3   1   13.33    0.60 
   8  -3   1   13.92    0.58 
   8  -3   1   13.21    0.53 
   8   3   1   12.83    0.57 
  -8   3  -1   13.76    0.53 
   8   3   1   14.17    0.57 
  -8   3  -1   13.75    0.44 
   8   3   1   13.84    0.53 
   9  -3   1   25.03    0.91 
   9  -3   1   25.00    0.78 
  -9  -3  -1   24.79    0.80 
   9  -3   1   27.08    0.89 
   9   3   1   24.93    0.90 
   9   3   1   25.65    0.80 
   9   3   1   25.44    0.86 
  10  -3   1    3.26    0.46 
  10  -3   1    3.50    0.43 
  10  -3   1    4.27    0.50 
  10   3   1    4.37    0.62 
  10   3   1    5.08    0.57 
  10   3   1    3.48    0.41 
  10  -4  -1    0.29    0.32 
  10  -4  -1    0.29    0.29 
  10  -4  -1    1.01    0.32 
  10   4  -1    0.11    0.30 
  10   4  -1    0.04    0.29 
  10   4  -1    0.01    0.32 
   9  -4  -1   56.87    1.52 
   9  -4  -1   58.11    1.32 
   9  -4  -1   56.68    1.60 
  -9  -4   1   56.54    1.42 
  -9   4   1   59.69    1.43 
   9   4  -1   58.03    1.36 
   9   4  -1   57.57    1.57 
   9   4  -1   59.01    1.50 
   8  -4  -1    3.50    0.40 
   8  -4  -1    3.33    0.31 
  -8  -4   1    3.44    0.30 
   8  -4  -1    2.87    0.32 
   8  -4  -1    3.29    0.34 
  -8   4   1    3.52    0.32 
   8   4  -1    3.97    0.35 
   8   4  -1    2.88    0.34 
  -8   4   1    3.82    0.31 
   7  -4  -1  148.55    3.01 
  -7  -4   1  150.95    3.13 
   7  -4  -1  148.80    2.74 
   7  -4  -1  143.74    3.32 
  -7  -4   1  145.82    3.07 
  -7   4   1  145.60    3.12 
  -7   4   1  153.03    3.24 
   7   4  -1  150.56    3.13 
   7   4  -1  146.25    3.28 
  -6  -4   1   10.11    0.31 
  -6  -4   1    9.50    0.35 
   6  -4  -1    9.56    0.37 
   6  -4  -1    9.31    0.43 
   6  -4  -1    9.86    0.36 
   6  -4  -1    9.96    0.40 
  -6   4   1   10.54    0.39 
   6   4  -1    9.62    0.38 
   6   4  -1    9.69    0.36 
  -6   4   1    9.78    0.38 
   6   4  -1    9.47    0.40 
   5  -4  -1   61.99    1.50 
  -5  -4   1   66.68    1.39 
   5  -4  -1   64.98    1.23 
   5  -4  -1   61.27    1.41 
  -5  -4   1   62.11    1.36 
   5   4  -1   62.83    1.39 
   5   4  -1   62.24    1.46 
   5   4  -1   61.23    1.24 
  -5   4   1   65.63    1.47 
  -4  -4   1   21.92    0.49 
   4  -4  -1   22.07    0.58 
  -4  -4   1   22.58    0.54 
   4  -4  -1   20.99    0.61 
  -4  -4   1   22.13    0.53 
   4  -4  -1   22.71    0.50 
  -4   4   1   23.53    0.60 
   4   4  -1   22.71    0.51 
   4   4  -1   22.20    0.55 
   4   4  -1   21.74    0.58 
  -4   4   1   21.92    0.56 
   3  -4  -1  141.37    3.05 
  -3  -4   1  143.74    2.85 
   3  -4  -1  135.13    2.76 
   3  -4  -1  141.46    2.89 
  -3  -4   1  150.86    3.00 
   3   4  -1  144.53    2.86 
  -3   4   1  142.47    2.88 
  -3   4   1  146.70    3.05 
   3   4  -1  140.00    2.50 
   3   4  -1  146.19    3.02 
  -2  -4   1   57.04    1.03 
  -2  -4   1   57.12    1.15 
   2  -4  -1   56.40    1.14 
   2  -4  -1   56.26    1.18 
  -2  -4   1   59.23    1.22 
   2   4  -1   58.21    1.24 
  -2   4   1   54.90    1.13 
   2   4  -1   55.86    1.03 
  -2   4   1   55.71    1.18 
  -2   4   1   57.63    1.26 
   2   4  -1   58.50    1.16 
  -1  -4   1  130.76    2.54 
   1  -4  -1  125.75    2.68 
  -1  -4   1  127.37    2.22 
   1  -4  -1  129.09    2.47 
   1  -4  -1  127.43    2.62 
  -1  -4   1  128.88    2.73 
   1   4  -1  125.96    2.20 
  -1   4   1  120.29    2.46 
   1   4  -1  126.71    2.69 
  -1   4   1  126.29    2.65 
   1   4  -1  128.19    2.44 
  -1   4   1  123.67    2.58 
   0  -4   1   62.44    1.09 
   0  -4  -1   62.51    1.09 
   0  -4   1   61.99    1.21 
   0  -4  -1   63.28    1.28 
   0  -4  -1   64.19    1.33 
   0  -4  -1   62.92    1.21 
   0   4   1   63.90    1.21 
   0   4   1   62.03    1.26 
   0   4   1   60.97    1.31 
   0   4  -1   63.24    1.21 
   0   4   1   64.10    1.25 
   0   4   1   62.37    1.08 
   0   4  -1   60.91    1.09 
   0   4   1   62.44    1.32 
   0   4  -1   63.31    1.33 
  -1  -4  -1    6.36    0.15 
  -1  -4  -1    6.82    0.18 
   1  -4   1    6.39    0.17 
   1  -4   1    6.89    0.21 
   1  -4   1    6.43    0.17 
   1  -4   1    6.32    0.18 
  -1   4  -1    7.67    0.18 
   1   4   1    6.87    0.16 
   1   4   1    6.44    0.15 
   1   4   1    6.53    0.18 
  -1   4  -1    6.72    0.18 
  -1   4  -1    6.67    0.21 
   1   4   1    6.90    0.18 
  -1   4  -1    6.75    0.17 
  -2  -4  -1   59.25    1.06 
   2  -4   1   58.08    1.18 
   2  -4   1   57.62    1.24 
  -2  -4  -1   59.81    1.21 
  -2   4  -1   58.39    1.24 
   2   4   1   60.13    1.24 
   2   4   1   59.57    1.21 
   2   4   1   62.23    1.24 
   2   4   1   60.30    1.07 
  -2   4  -1   59.59    1.18 
  -2   4  -1   60.97    1.31 
  -3  -4  -1    7.43    0.21 
   3  -4   1    7.21    0.27 
   3  -4   1    7.14    0.25 
  -3  -4  -1    7.30    0.22 
   3  -4   1    6.95    0.23 
   3  -4   1    7.93    0.24 
  -3   4  -1    7.23    0.25 
   3   4   1    7.37    0.22 
   3   4   1    7.37    0.21 
  -3   4  -1    8.09    0.26 
   3   4   1    7.55    0.23 
  -4  -4  -1   99.94    2.04 
   4  -4   1   95.96    2.18 
   4  -4   1   96.64    1.98 
   4  -4   1   98.07    2.08 
   4  -4   1  100.77    2.09 
   4   4   1   97.98    2.12 
  -4   4  -1   97.86    2.07 
   4   4   1  100.31    2.05 
   4   4   1   99.22    1.81 
  -4   4  -1  105.45    2.16 
   5  -4   1   11.82    0.39 
   5  -4   1   11.61    0.37 
   5  -4   1   11.51    0.40 
   5  -4   1   11.35    0.42 
  -5  -4  -1   11.86    0.36 
  -5   4  -1   12.33    0.38 
  -5   4  -1   11.70    0.40 
   5   4   1   11.95    0.38 
   5   4   1   11.46    0.38 
   5   4   1   11.83    0.36 
   6  -4   1  127.89    2.52 
  -6  -4  -1  120.99    2.58 
   6  -4   1  124.79    2.65 
   6  -4   1  124.11    2.30 
   6  -4   1  122.56    2.65 
   6  -4   1  119.82    2.77 
  -6   4  -1  123.54    2.63 
  -6   4  -1  130.12    2.70 
   6   4   1  125.05    2.73 
   6   4   1  123.68    2.31 
   6   4   1  124.86    2.62 
   7  -4   1   47.95    1.29 
   7  -4   1   49.29    1.22 
  -7  -4  -1   48.76    1.17 
   7  -4   1   49.25    1.17 
   7   4   1   50.59    1.22 
   7   4   1   50.04    1.11 
  -7   4  -1   48.55    1.20 
   7   4   1   48.30    1.25 
  -7   4  -1   51.54    1.18 
   8  -4   1   18.59    0.73 
   8  -4   1   18.48    0.61 
   8  -4   1   19.96    0.70 
  -8  -4  -1   18.55    0.62 
   8  -4   1   19.10    0.64 
   8   4   1   20.30    0.68 
  -8   4  -1   19.12    0.65 
   8   4   1   18.68    0.70 
   8   4   1   19.60    0.63 
  -8   4  -1   20.59    0.58 
   9  -4   1   42.98    1.28 
  -9  -4  -1   43.22    1.14 
   9  -4   1   42.48    1.07 
   9  -4   1   42.68    1.22 
   9   4   1   42.38    1.24 
   9   4   1   42.97    1.20 
   9   4   1   41.81    1.10 
  10  -4   1   13.23    0.64 
  10  -4   1   11.50    0.76 
  10  -4   1   13.09    0.72 
  10   4   1   12.49    0.70 
  10   4   1   12.09    0.68 
  10   4   1   12.19    0.75 
  10  -5  -1   56.77    1.57 
  10  -5  -1   54.71    1.35 
  10  -5  -1   55.77    1.67 
  10   5  -1   55.52    1.62 
  10   5  -1   55.33    1.40 
  10   5  -1   55.44    1.53 
   9  -5  -1    1.43    0.26 
   9  -5  -1    1.27    0.31 
  -9  -5   1    1.51    0.25 
   9  -5  -1    2.01    0.33 
  -9   5   1    1.17    0.25 
   9   5  -1    1.24    0.30 
   9   5  -1    1.58    0.27 
   9   5  -1    1.54    0.30 
   8  -5  -1   95.60    2.07 
   8  -5  -1   95.23    1.89 
   8  -5  -1   92.95    2.29 
   8  -5  -1   94.00    2.18 
  -8  -5   1   89.43    2.06 
  -8   5   1   99.83    2.18 
  -8   5   1   91.75    2.18 
   8   5  -1   97.01    1.92 
   7  -5  -1    0.32    0.13 
  -7  -5   1    0.45    0.13 
  -7  -5   1    0.32    0.09 
   7  -5  -1    0.47    0.19 
   7  -5  -1    0.26    0.14 
   7   5  -1    0.49    0.16 
   7   5  -1    0.33    0.16 
   7   5  -1    0.23    0.16 
  -7   5   1    0.29    0.14 
  -6  -5   1  225.90    4.54 
   6  -5  -1  209.53    4.46 
   6  -5  -1  211.60    4.70 
   6  -5  -1  221.09    3.86 
   6  -5  -1  219.35    4.26 
   6   5  -1  218.46    3.88 
  -6   5   1  213.29    4.43 
   6   5  -1  223.30    4.43 
   6   5  -1  217.76    4.66 
   5  -5  -1    3.88    0.26 
  -5  -5   1    3.86    0.19 
  -5  -5   1    3.76    0.19 
   5  -5  -1    3.96    0.24 
  -5  -5   1    3.82    0.17 
   5  -5  -1    3.49    0.21 
   5  -5  -1    3.82    0.21 
   5   5  -1    3.86    0.21 
   5   5  -1    3.81    0.23 
  -5   5   1    3.90    0.23 
   5   5  -1    3.89    0.22 
  -5   5   1    3.75    0.22 
   4  -5  -1  267.31    5.07 
   4  -5  -1  258.12    5.30 
  -4  -5   1  276.92    5.50 
  -4  -5   1  262.56    4.56 
  -4  -5   1  261.23    5.24 
   4  -5  -1  257.59    5.59 
   4   5  -1  267.46    4.59 
   4   5  -1  267.92    5.55 
  -4   5   1  273.81    5.58 
   4   5  -1  268.23    5.31 
  -4   5   1  260.53    5.28 
  -3  -5   1   22.42    0.51 
  -3  -5   1   20.85    0.49 
  -3  -5   1   21.88    0.46 
   3  -5  -1   21.06    0.51 
   3  -5  -1   21.20    0.57 
  -3   5   1   21.89    0.57 
   3   5  -1   22.11    0.50 
   3   5  -1   22.47    0.54 
   3   5  -1   20.77    0.47 
  -3   5   1   21.10    0.53 
  -2  -5   1  104.16    2.05 
   2  -5  -1  101.25    2.01 
   2  -5  -1  104.73    2.22 
  -2  -5   1  107.82    2.17 
   2  -5  -1   99.10    2.09 
   2   5  -1  106.07    2.19 
  -2   5   1  102.08    2.01 
  -2   5   1  104.97    2.22 
  -2   5   1   97.52    2.08 
   2   5  -1  104.23    1.81 
   2   5  -1  107.13    2.06 
   1  -5  -1   67.07    1.30 
  -1  -5   1   65.82    1.17 
  -1  -5   1   66.46    1.41 
  -1  -5   1   65.75    1.42 
   1  -5  -1   66.18    1.43 
  -1  -5   1   69.87    1.31 
   1  -5  -1   66.30    1.34 
   1   5  -1   67.58    1.42 
   1   5  -1   64.87    1.17 
  -1   5   1   66.54    1.44 
   1   5  -1   67.59    1.30 
  -1   5   1   64.74    1.30 
  -1   5   1   64.80    1.34 
   0  -5   1   53.32    1.17 
   0  -5  -1   59.76    1.24 
   0  -5   1   59.98    1.03 
   0  -5   1   58.59    1.25 
   0  -5  -1   60.97    1.23 
   0  -5  -1   59.51    1.21 
   0  -5   1   57.15    1.27 
   0  -5   1   60.29    1.14 
   0  -5  -1   59.70    1.01 
   0  -5  -1   59.01    1.16 
   0   5   1   58.65    1.17 
   0   5   1   58.67    1.25 
   0   5  -1   58.38    1.14 
   0   5   1   59.72    1.24 
   0   5  -1   56.89    1.03 
   0   5   1   59.04    1.17 
   0   5   1   57.51    1.14 
   0   5  -1   58.40    1.26 
   0   5  -1   57.88    1.27 
   1  -5   1  140.84    2.72 
  -1  -5  -1  147.19    2.77 
  -1  -5  -1  141.65    2.49 
   1  -5   1  143.24    2.83 
   1  -5   1  138.30    2.97 
   1  -5   1  137.34    2.87 
  -1  -5  -1  142.64    2.84 
   1   5   1  141.07    2.69 
  -1   5  -1  141.17    2.87 
  -1   5  -1  138.16    2.89 
   1   5   1  144.87    2.89 
   1   5   1  141.48    2.50 
   1   5   1  143.91    2.96 
   1   5   1  143.25    2.81 
  -1   5  -1  139.96    2.97 
   1   5   1  140.74    2.96 
  -1   5  -1  139.94    2.68 
   2  -5   1    2.58    0.11 
   2  -5   1    2.45    0.14 
   2  -5   1    2.85    0.12 
  -2  -5  -1    2.48    0.09 
   2  -5   1    2.42    0.12 
  -2  -5  -1    2.51    0.10 
   2   5   1    2.85    0.11 
   2   5   1    2.63    0.10 
   2   5   1    2.36    0.11 
   2   5   1    2.68    0.09 
  -2   5  -1    2.44    0.11 
  -2   5  -1    2.56    0.14 
  -3  -5  -1    2.76    0.13 
   3  -5   1    3.27    0.16 
   3  -5   1    2.67    0.17 
   3  -5   1    2.67    0.14 
   3  -5   1    3.26    0.15 
  -3  -5  -1    2.92    0.13 
   3   5   1    2.92    0.13 
  -3   5  -1    2.96    0.16 
  -3   5  -1    2.66    0.15 
   3   5   1    3.00    0.13 
   3   5   1    2.65    0.12 
   3   5   1    2.86    0.14 
   4  -5   1   29.57    0.68 
   4  -5   1   27.29    0.75 
   4  -5   1   28.76    0.70 
  -4  -5  -1   28.46    0.67 
   4   5   1   29.02    0.68 
   4   5   1   28.64    0.69 
   4   5   1   29.14    0.63 
  -4   5  -1   30.51    0.74 
  -4   5  -1   29.01    0.71 
  -5  -5  -1    5.66    0.24 
   5  -5   1    5.90    0.28 
   5  -5   1    5.39    0.29 
   5  -5   1    5.61    0.25 
   5   5   1    5.32    0.25 
   5   5   1    5.24    0.24 
   5   5   1    5.79    0.25 
  -5   5  -1    6.23    0.26 
  -5   5  -1    5.37    0.27 
   6  -5   1   96.98    2.29 
   6  -5   1  100.17    2.17 
   6  -5   1  100.31    2.08 
   6  -5   1   96.77    2.18 
  -6   5  -1   97.42    2.16 
   6   5   1   99.39    2.23 
   6   5   1  102.35    1.92 
  -6   5  -1  105.65    2.23 
   6   5   1  102.71    2.15 
   7  -5   1    3.50    0.27 
   7  -5   1    3.37    0.33 
   7  -5   1    2.98    0.30 
   7  -5   1    2.88    0.27 
  -7  -5  -1    3.29    0.25 
   7  -5   1    3.36    0.28 
   7   5   1    3.24    0.31 
  -7   5  -1    3.56    0.27 
   7   5   1    3.00    0.28 
   7   5   1    3.54    0.29 
   8  -5   1   37.51    1.06 
   8  -5   1   35.21    1.09 
   8  -5   1   37.36    0.92 
  -8  -5  -1   37.08    0.97 
   8  -5   1   37.70    0.99 
  -8   5  -1   35.26    1.00 
  -8   5  -1   38.08    0.95 
   8   5   1   37.62    1.03 
   8   5   1   38.27    0.95 
   8   5   1   37.73    1.06 
   9  -5   1    7.12    0.46 
   9  -5   1    6.85    0.54 
  -9  -5  -1    7.06    0.45 
   9  -5   1    6.43    0.49 
  -9   5  -1    7.18    0.38 
   9   5   1    6.35    0.54 
   9   5   1    7.38    0.51 
   9   5   1    7.38    0.50 
  10  -5   1   54.00    1.63 
  10  -5   1   57.81    1.57 
  10  -5   1   54.34    1.35 
  10   5   1   57.58    1.54 
  10   5   1   55.45    1.40 
  10   5   1   53.73    1.58 
  10  -6  -1    0.51    0.31 
  10  -6  -1    0.27    0.33 
  10  -6  -1    0.19    0.29 
  10   6  -1    0.35    0.34 
  10   6  -1    0.28    0.32 
  10   6  -1    0.46    0.35 
   9  -6  -1   28.89    0.95 
  -9  -6   1   25.23    0.82 
   9  -6  -1   27.46    0.80 
   9  -6  -1   26.10    0.99 
   9  -6  -1   28.91    0.95 
   9   6  -1   28.29    0.85 
   9   6  -1   27.73    0.90 
   9   6  -1   26.19    0.94 
  -9   6   1   28.32    0.86 
  -8  -6   1    1.31    0.20 
   8  -6  -1    1.44    0.27 
   8  -6  -1    1.30    0.22 
   8  -6  -1    1.43    0.23 
   8  -6  -1    1.54    0.22 
  -8   6   1    1.92    0.24 
   8   6  -1    1.58    0.24 
  -7  -6   1   11.96    0.43 
   7  -6  -1   12.99    0.44 
   7  -6  -1   12.90    0.47 
   7  -6  -1   11.16    0.49 
  -7   6   1   13.41    0.49 
   7   6  -1   12.36    0.46 
   7   6  -1   12.27    0.48 
   7   6  -1   12.55    0.51 
  -6  -6   1    0.97    0.12 
   6  -6  -1    0.94    0.18 
   6  -6  -1    0.97    0.16 
  -6  -6   1    1.14    0.14 
   6  -6  -1    1.06    0.17 
   6  -6  -1    0.86    0.14 
  -6  -6   1    1.01    0.14 
  -6   6   1    1.04    0.15 
   6   6  -1    1.27    0.18 
   6   6  -1    0.75    0.14 
   6   6  -1    0.78    0.15 
  -6   6   1    1.16    0.17 
   5  -6  -1  136.54    2.92 
  -5  -6   1  139.66    2.50 
   5  -6  -1  133.04    3.08 
  -5  -6   1  138.27    2.84 
  -5  -6   1  145.99    2.94 
   5  -6  -1  140.66    2.79 
   5  -6  -1  143.28    2.52 
   5   6  -1  140.22    2.87 
  -5   6   1  137.75    2.90 
  -5   6   1  146.40    3.06 
   5   6  -1  138.98    2.54 
   5   6  -1  142.05    3.03 
  -4  -6   1   14.79    0.37 
   4  -6  -1   14.71    0.44 
  -4  -6   1   15.40    0.38 
  -4  -6   1   14.43    0.38 
   4  -6  -1   14.79    0.42 
   4   6  -1   14.80    0.40 
  -4   6   1   15.08    0.43 
   4   6  -1   14.70    0.43 
  -4   6   1   15.41    0.46 
   4   6  -1   14.86    0.39 
   3  -6  -1   49.51    1.10 
   3  -6  -1   49.37    1.06 
   3  -6  -1   49.99    1.18 
  -3  -6   1   52.71    1.10 
  -3  -6   1   49.99    1.05 
   3   6  -1   52.05    1.06 
  -3   6   1   49.21    1.05 
   3   6  -1   49.49    0.96 
   3   6  -1   51.61    1.14 
   3   6  -1   52.57    1.04 
  -3   6   1   49.49    1.09 
  -2  -6   1  278.19    4.88 
   2  -6  -1  278.57    5.41 
  -2  -6   1  276.05    5.51 
   2  -6  -1  269.60    5.81 
  -2  -6   1  277.40    5.83 
  -2  -6   1  286.12    5.89 
   2  -6  -1  267.25    5.60 
  -2   6   1  263.08    5.58 
   2   6  -1  281.80    5.84 
  -2   6   1  274.14    5.87 
   2   6  -1  283.09    5.54 
  -2   6   1  276.05    5.44 
   2   6  -1  281.29    4.80 
   2   6  -1  277.49    5.23 
   1  -6  -1    2.43    0.09 
  -1  -6   1    1.93    0.08 
   1  -6  -1    1.98    0.10 
   1  -6  -1    2.19    0.11 
  -1  -6   1    2.22    0.10 
  -1  -6   1    1.99    0.11 
  -1   6   1    1.89    0.09 
   1   6  -1    1.95    0.09 
   1   6  -1    1.95    0.10 
  -1   6   1    2.01    0.12 
   0  -6   1   66.20    1.41 
   0  -6  -1   64.69    1.27 
   0  -6  -1   64.04    1.28 
   0  -6  -1   64.85    1.11 
   0  -6   1   64.26    1.29 
   0  -6  -1   64.77    1.37 
   0  -6   1   64.87    1.27 
   0  -6   1   64.78    1.39 
   0  -6  -1   65.62    1.37 
   0  -6   1   63.47    1.14 
   0   6   1   64.29    1.39 
   0   6   1   65.21    1.28 
   0   6  -1   65.17    1.27 
   0   6   1   65.97    1.38 
   0   6  -1   62.34    1.14 
   0   6  -1   64.81    1.41 
   0   6  -1   64.60    1.39 
   0   6   1   65.53    1.12 
   1  -6   1   10.61    0.32 
   1  -6   1   10.33    0.27 
   1  -6   1   10.51    0.27 
  -1  -6  -1   10.53    0.27 
   1  -6   1   10.61    0.25 
   1  -6   1   10.60    0.30 
  -1  -6  -1   10.99    0.27 
  -1  -6  -1   11.00    0.23 
   1   6   1   11.09    0.23 
   1   6   1   11.07    0.27 
   1   6   1   10.86    0.27 
  -1   6  -1   10.78    0.27 
   1   6   1   10.34    0.27 
   1   6   1   11.21    0.26 
  -1   6  -1   10.27    0.25 
  -1   6  -1   10.51    0.27 
   2  -6   1   87.42    1.86 
  -2  -6  -1   93.03    1.81 
   2  -6   1   89.60    1.86 
  -2  -6  -1   93.50    1.86 
   2  -6   1   91.02    1.78 
  -2  -6  -1   90.27    1.60 
   2   6   1   90.38    1.60 
   2   6   1   93.50    1.86 
   2   6   1   90.79    1.81 
  -2   6  -1   92.41    1.98 
  -2   6  -1   89.87    1.78 
   2   6   1   92.49    1.90 
  -2   6  -1   90.83    1.86 
   2   6   1   91.47    1.90 
   2   6   1   90.00    1.79 
   3  -6   1    1.18    0.11 
   3  -6   1    1.33    0.10 
  -3  -6  -1    1.33    0.09 
   3  -6   1    1.39    0.12 
   3  -6   1    1.54    0.14 
  -3  -6  -1    1.28    0.10 
   3   6   1    1.30    0.09 
   3   6   1    1.30    0.09 
  -3   6  -1    1.30    0.12 
  -3   6  -1    1.54    0.13 
   3   6   1    1.26    0.10 
   3   6   1    1.13    0.11 
  -3   6  -1    1.21    0.11 
   4  -6   1   65.61    1.37 
  -4  -6  -1   66.49    1.38 
   4  -6   1   62.90    1.52 
   4  -6   1   65.03    1.42 
   4  -6   1   64.83    1.44 
  -4  -6  -1   66.51    1.23 
   4   6   1   66.13    1.39 
  -4   6  -1   64.23    1.43 
  -4   6  -1   69.92    1.51 
   4   6   1   66.37    1.26 
   4   6   1   65.25    1.44 
   4   6   1   67.59    1.41 
   5  -6   1   64.68    1.47 
   5  -6   1   65.96    1.40 
  -5  -6  -1   64.27    1.40 
   5  -6   1   64.98    1.45 
   5  -6   1   63.17    1.55 
  -5   6  -1   70.35    1.52 
   5   6   1   65.08    1.29 
  -5   6  -1   64.51    1.46 
   5   6   1   64.47    1.47 
   5   6   1   65.21    1.42 
   6  -6   1   35.85    0.90 
   6  -6   1   34.89    0.98 
  -6  -6  -1   34.62    0.87 
   6  -6   1   35.67    0.94 
   6  -6   1   36.20    0.88 
  -6   6  -1   34.36    0.91 
  -6   6  -1   37.62    0.92 
   6   6   1   35.32    0.83 
   6   6   1   35.20    0.89 
   6   6   1   35.58    0.91 
   7  -6   1   19.48    0.65 
   7  -6   1   18.60    0.68 
   7  -6   1   19.13    0.56 
   7  -6   1   19.57    0.60 
   7  -6   1   19.48    0.61 
  -7  -6  -1   18.69    0.57 
   7   6   1   18.18    0.62 
   7   6   1   18.66    0.59 
   7   6   1   18.99    0.61 
   8  -6   1    4.31    0.40 
   8  -6   1    4.35    0.35 
   8  -6   1    4.15    0.37 
  -8  -6  -1    3.82    0.33 
   8  -6   1    4.12    0.37 
   8   6   1    3.78    0.38 
  -8   6  -1    3.58    0.31 
   8   6   1    3.53    0.38 
   9  -6   1    6.24    0.49 
   9  -6   1    6.10    0.54 
  -9  -6  -1    6.04    0.43 
   9  -6   1    6.55    0.45 
   9   6   1    5.87    0.52 
   9   6   1    6.51    0.49 
   9   6   1    6.26    0.48 
  10  -6   1    0.66    0.29 
  10  -6   1    0.60    0.29 
  10  -6   1    0.67    0.36 
  10   6   1    1.12    0.37 
  10   6   1    0.64    0.35 
  10   6   1    0.59    0.36 
  10  -7  -1    1.84    0.34 
  10  -7  -1    1.76    0.36 
  10  -7  -1    1.56    0.40 
  10   7  -1    1.61    0.40 
  10   7  -1    1.96    0.40 
  10   7  -1    1.97    0.38 
  -9  -7   1    2.53    0.29 
   9  -7  -1    2.12    0.31 
   9  -7  -1    1.74    0.33 
   9  -7  -1    2.23    0.31 
   9  -7  -1    2.03    0.33 
   9   7  -1    2.40    0.34 
   9   7  -1    1.95    0.33 
  -9   7   1    2.36    0.30 
   9   7  -1    2.04    0.30 
   8  -7  -1   18.27    0.63 
  -8  -7   1   16.39    0.56 
   8  -7  -1   16.35    0.70 
   8  -7  -1   16.34    0.66 
   8  -7  -1   17.26    0.57 
   8   7  -1   18.17    0.62 
   8   7  -1   17.37    0.63 
  -8   7   1   18.66    0.64 
   7  -7  -1    0.23    0.16 
  -7  -7   1    0.36    0.13 
   7  -7  -1    0.11    0.14 
   7  -7  -1    0.19    0.17 
   7  -7  -1    0.50    0.14 
   7   7  -1    0.27    0.16 
   7   7  -1    0.58    0.18 
  -7   7   1    0.60    0.16 
   7   7  -1    0.13    0.15 
  -6  -7   1   10.73    0.29 
  -6  -7   1   10.04    0.35 
   6  -7  -1    9.72    0.42 
   6  -7  -1   10.82    0.40 
  -6  -7   1   10.35    0.35 
   6  -7  -1   10.63    0.36 
   6  -7  -1    9.64    0.45 
   6   7  -1   10.69    0.39 
  -6   7   1   10.35    0.40 
  -6   7   1   10.68    0.43 
   6   7  -1   10.72    0.39 
   6   7  -1   10.22    0.41 
   5  -7  -1   65.74    1.50 
   5  -7  -1   64.40    1.59 
  -5  -7   1   67.39    1.28 
  -5  -7   1   69.10    1.44 
  -5  -7   1   67.08    1.42 
   5  -7  -1   65.93    1.43 
  -5   7   1   70.30    1.59 
   5   7  -1   66.08    1.53 
   5   7  -1   65.74    1.31 
  -5   7   1   64.69    1.47 
   5   7  -1   66.64    1.44 
   4  -7  -1   31.90    0.75 
   4  -7  -1   31.25    0.78 
  -4  -7   1   31.06    0.71 
   4  -7  -1   30.56    0.84 
  -4  -7   1   31.58    0.67 
  -4  -7   1   33.59    0.73 
  -4   7   1   32.39    0.77 
   4   7  -1   32.14    0.79 
   4   7  -1   33.47    0.70 
   4   7  -1   32.99    0.74 
   4   7  -1   31.88    0.69 
  -4   7   1   32.60    0.83 
   3  -7  -1  181.70    3.47 
  -3  -7   1  181.25    3.76 
   3  -7  -1  174.51    3.83 
  -3  -7   1  185.58    3.75 
  -3  -7   1  177.30    3.55 
   3  -7  -1  175.95    3.62 
  -3  -7   1  180.75    3.12 
   3   7  -1  182.29    3.79 
  -3   7   1  173.69    3.61 
   3   7  -1  180.53    3.14 
   3   7  -1  182.39    3.56 
  -3   7   1  184.16    3.84 
  -3   7   1  179.68    3.47 
   3   7  -1  185.33    3.61 
  -2  -7   1   68.38    1.23 
   2  -7  -1   66.61    1.42 
  -2  -7   1   69.62    1.37 
   2  -7  -1   70.34    1.38 
   2  -7  -1   66.41    1.52 
  -2  -7   1   68.79    1.48 
  -2  -7   1   71.85    1.47 
   2   7  -1   68.27    1.24 
   2   7  -1   67.45    1.39 
  -2   7   1   68.32    1.37 
   2   7  -1   69.23    1.49 
  -2   7   1   68.09    1.53 
  -2   7   1   67.70    1.42 
  -1  -7   1  426.97    7.57 
   1  -7  -1  427.12    8.73 
   1  -7  -1  420.94    8.41 
   1  -7  -1  445.85    9.35 
  -1  -7   1  436.38    8.39 
  -1  -7   1  439.16    9.26 
   1  -7  -1  431.14    9.26 
  -1  -7   1  453.16    9.27 
   1   7  -1  446.69    8.60 
   1   7  -1  456.43    9.35 
  -1   7   1  439.12    9.27 
  -1   7   1  428.84    8.77 
   1   7  -1  444.35    7.73 
   0  -7  -1   14.49    0.36 
   0  -7   1   14.29    0.39 
   0  -7   1   14.87    0.38 
   0  -7  -1   15.79    0.36 
   0  -7   1   14.51    0.31 
   0  -7  -1   15.04    0.29 
   0  -7   1   14.91    0.35 
   0  -7   1   14.67    0.33 
   0  -7  -1   15.03    0.35 
   0   7   1   14.50    0.32 
   0   7   1   14.45    0.38 
   0   7   1   14.95    0.37 
   0   7  -1   14.25    0.35 
   0   7   1   14.91    0.29 
   0   7  -1   14.70    0.31 
   0   7  -1   14.82    0.38 
   0   7  -1   14.48    0.40 
   1  -7   1  104.76    2.22 
   1  -7   1  103.53    2.02 
  -1  -7  -1  106.18    2.02 
   1  -7   1  102.88    2.09 
   1  -7   1  100.20    2.24 
  -1  -7  -1  103.73    1.80 
  -1  -7  -1  106.33    2.15 
  -1  -7  -1  104.77    2.11 
   1  -7   1  104.25    2.09 
   1   7   1  104.98    1.80 
   1   7   1  104.11    2.20 
  -1   7  -1  104.79    2.02 
  -1   7  -1  101.91    2.24 
   1   7   1  104.52    2.02 
   1   7   1  103.73    2.19 
   1   7   1  108.24    2.12 
  -1   7  -1  102.52    2.09 
  -1   7  -1  104.00    2.09 
  -2  -7  -1   26.37    0.51 
   2  -7   1   25.45    0.58 
  -2  -7  -1   26.51    0.58 
   2  -7   1   25.63    0.67 
   2  -7   1   26.02    0.61 
   2  -7   1   26.03    0.58 
  -2  -7  -1   26.95    0.54 
  -2   7  -1   25.79    0.58 
   2   7   1   25.48    0.54 
   2   7   1   25.44    0.52 
   2   7   1   26.28    0.58 
   2   7   1   26.25    0.59 
  -2   7  -1   24.95    0.58 
   2   7   1   26.38    0.60 
   2   7   1   26.26    0.58 
  -2   7  -1   26.21    0.61 
  -2   7  -1   26.82    0.66 
  -3  -7  -1  352.38    7.03 
   3  -7   1  347.23    6.76 
   3  -7   1  339.51    7.34 
  -3  -7  -1  349.09    6.14 
   3  -7   1  359.04    7.21 
   3  -7   1  340.38    6.94 
   3   7   1  352.15    6.18 
  -3   7  -1  349.88    6.64 
   3   7   1  355.13    7.02 
   3   7   1  356.82    7.39 
  -3   7  -1  347.09    7.00 
  -3   7  -1  360.95    7.33 
   3   7   1  365.88    7.23 
   4  -7   1   17.07    0.47 
  -4  -7  -1   17.38    0.43 
   4  -7   1   16.72    0.53 
   4  -7   1   17.14    0.47 
  -4  -7  -1   17.01    0.41 
   4  -7   1   17.06    0.50 
   4   7   1   17.66    0.45 
  -4   7  -1   17.74    0.49 
   4   7   1   17.70    0.45 
   4   7   1   16.83    0.45 
   4   7   1   16.80    0.44 
  -4   7  -1   18.45    0.52 
   5  -7   1  136.45    2.85 
  -5  -7  -1  135.67    2.78 
   5  -7   1  136.98    2.73 
   5  -7   1  133.41    2.87 
   5  -7   1  131.86    3.02 
  -5   7  -1  144.84    2.99 
  -5   7  -1  134.60    2.85 
   5   7   1  141.34    2.84 
   5   7   1  136.81    2.93 
   5   7   1  137.57    2.49 
   5   7   1  137.67    2.81 
  -6  -7  -1    2.00    0.19 
   6  -7   1    2.26    0.23 
   6  -7   1    2.51    0.27 
   6  -7   1    2.18    0.21 
   6  -7   1    2.49    0.24 
   6   7   1    2.31    0.23 
   6   7   1    2.62    0.23 
   6   7   1    2.33    0.23 
   6   7   1    2.33    0.20 
  -6   7  -1    2.21    0.23 
   7  -7   1   71.32    1.71 
  -7  -7  -1   72.86    1.61 
   7  -7   1   73.95    1.47 
   7  -7   1   71.60    1.61 
   7  -7   1   71.11    1.66 
   7   7   1   72.04    1.50 
   7   7   1   72.74    1.65 
  -7   7  -1   75.03    1.70 
   7   7   1   71.07    1.71 
   7   7   1   72.43    1.62 
   8  -7   1    3.00    0.31 
   8  -7   1    2.67    0.33 
   8  -7   1    2.62    0.34 
   8  -7   1    3.04    0.39 
  -8  -7  -1    2.70    0.30 
   8   7   1    2.43    0.29 
   8   7   1    2.07    0.28 
   8   7   1    2.04    0.28 
   8   7   1    2.05    0.27 
  -8   7  -1    2.12    0.23 
   9  -7   1   11.45    0.65 
   9  -7   1   11.86    0.54 
   9  -7   1   11.33    0.61 
  -9  -7  -1   10.88    0.53 
   9   7   1   11.22    0.59 
  -9   7  -1   11.19    0.51 
   9   7   1   11.04    0.62 
   9   7   1   11.81    0.53 
   9   7   1   11.62    0.59 
  10  -7   1    0.36    0.31 
  10  -7   1    0.19    0.28 
  10  -7   1    0.88    0.36 
  10   7   1    1.15    0.34 
  10   7   1    0.42    0.37 
  10   7   1    0.91    0.36 
  10  -8  -1   11.36    0.69 
  10  -8  -1    9.21    0.77 
  10  -8  -1   10.46    0.62 
  10   8  -1   10.97    0.68 
  10   8  -1   10.01    0.76 
  10   8  -1   10.69    0.69 
   9  -8  -1   36.41    1.19 
   9  -8  -1   36.97    0.97 
   9  -8  -1   36.72    1.13 
  -9  -8   1   34.68    1.00 
   9  -8  -1   37.24    1.06 
   9   8  -1   37.30    0.96 
   9   8  -1   38.68    1.04 
   9   8  -1   36.20    1.15 
   9   8  -1   37.94    1.09 
   8  -8  -1    2.11    0.26 
   8  -8  -1    1.69    0.28 
  -8  -8   1    1.67    0.22 
   8  -8  -1    1.69    0.24 
   8  -8  -1    1.38    0.24 
   8   8  -1    1.80    0.27 
   8   8  -1    1.52    0.25 
  -8   8   1    1.72    0.26 
   7  -8  -1    9.89    0.39 
   7  -8  -1    8.99    0.48 
   7  -8  -1    9.72    0.42 
   7  -8  -1    9.11    0.44 
   7  -8  -1    9.20    0.40 
  -7  -8   1    8.42    0.36 
  -7   8   1    9.71    0.44 
   7   8  -1    9.10    0.41 
   7   8  -1    9.04    0.41 
   7   8  -1    9.03    0.44 
   6  -8  -1    1.90    0.26 
   6  -8  -1    2.25    0.21 
   6  -8  -1    2.27    0.23 
   6  -8  -1    1.99    0.24 
  -6  -8   1    2.19    0.18 
  -6  -8   1    2.66    0.20 
   6   8  -1    2.56    0.25 
   6   8  -1    2.62    0.22 
  -6   8   1    1.66    0.24 
   6   8  -1    2.26    0.24 
  -6   8   1    2.15    0.22 
  -5  -8   1   95.51    1.94 
   5  -8  -1   90.70    1.90 
  -5  -8   1   94.91    1.95 
   5  -8  -1   88.69    2.11 
  -5  -8   1   90.10    1.70 
   5  -8  -1   89.79    1.99 
  -5  -8   1   89.52    1.90 
   5   8  -1   91.74    1.74 
   5   8  -1   94.44    1.90 
  -5   8   1   90.53    1.97 
   5   8  -1   92.39    1.93 
  -5   8   1   94.22    2.10 
   5   8  -1   92.40    2.05 
  -4  -8   1  119.95    2.18 
  -4  -8   1  125.33    2.58 
   4  -8  -1  117.92    2.69 
  -4  -8   1  119.93    2.46 
   4  -8  -1  117.30    2.43 
   4  -8  -1  120.90    2.54 
  -4  -8   1  126.28    2.57 
   4   8  -1  125.21    2.47 
  -4   8   1  125.42    2.69 
   4   8  -1  122.86    2.21 
   4   8  -1  123.76    2.64 
   4   8  -1  123.37    2.47 
  -4   8   1  121.80    2.53 
  -3  -8   1   28.77    0.60 
   3  -8  -1   28.88    0.70 
   3  -8  -1   28.72    0.76 
  -3  -8   1   30.96    0.68 
  -3  -8   1   28.54    0.63 
  -3  -8   1   30.10    0.69 
   3   8  -1   30.16    0.64 
  -3   8   1   29.78    0.76 
   3   8  -1   30.13    0.72 
  -3   8   1   28.66    0.69 
   3   8  -1   28.70    0.70 
   3   8  -1   29.49    0.62 
   2  -8  -1   91.65    1.89 
  -2  -8   1   93.81    1.83 
  -2  -8   1   94.55    1.96 
   2  -8  -1   91.05    1.86 
   2  -8  -1   91.56    2.02 
   2  -8  -1   92.18    1.83 
  -2  -8   1   94.21    1.98 
  -2  -8   1   90.53    1.64 
  -2   8   1   90.97    1.89 
   2   8  -1   90.44    1.84 
  -2   8   1   95.23    2.04 
   2   8  -1   94.30    1.99 
   2   8  -1   93.90    1.65 
  -2   8   1   92.62    1.83 
  -1  -8   1   39.80    0.88 
  -1  -8   1   39.51    0.73 
   1  -8  -1   40.17    0.89 
   1  -8  -1   38.87    0.82 
   1  -8  -1   40.02    0.71 
  -1  -8   1   39.26    0.90 
   1  -8  -1   39.07    0.90 
  -1  -8   1   39.65    0.83 
   1  -8  -1   38.93    0.82 
  -1   8   1   38.51    0.92 
   1   8  -1   38.64    0.74 
   1   8  -1   39.28    0.83 
   1   8  -1   39.35    0.89 
  -1   8   1   39.86    0.83 
  -1   8   1   38.52    0.82 
   0  -8  -1  340.65    5.91 
   0  -8   1  344.50    6.03 
   0  -8  -1  345.57    7.23 
   0  -8   1  340.07    6.83 
   0  -8   1  340.62    6.62 
   0  -8  -1  348.78    6.74 
   0  -8  -1  345.15    7.23 
   0  -8   1  350.18    7.36 
   0  -8   1  335.22    7.36 
   0   8   1  342.01    7.24 
   0   8  -1  338.96    7.30 
   0   8  -1  341.84    7.23 
   0   8  -1  334.37    5.93 
   0   8   1  348.08    5.94 
   0   8   1  342.39    6.73 
   0   8   1  346.89    7.31 
   0   8   1  341.33    6.77 
  -1  -8  -1   63.15    1.24 
   1  -8   1   60.01    1.26 
   1  -8   1   62.13    1.11 
   1  -8   1   61.07    1.38 
   1  -8   1   61.75    1.36 
  -1  -8  -1   62.03    1.28 
  -1  -8  -1   60.43    1.08 
  -1  -8  -1   63.11    1.29 
   1  -8   1   59.41    1.23 
   1   8   1   62.00    1.32 
  -1   8  -1   60.95    1.25 
   1   8   1   61.20    1.09 
   1   8   1   61.99    1.24 
  -1   8  -1   59.67    1.23 
  -1   8  -1   61.88    1.27 
   1   8   1   61.49    1.33 
   2  -8   1  245.52    5.14 
   2  -8   1  254.24    5.41 
   2  -8   1  257.66    5.19 
  -2  -8  -1  263.22    5.27 
   2  -8   1  259.03    4.95 
  -2  -8  -1  257.69    4.39 
   2   8   1  267.64    5.18 
   2   8   1  261.47    5.42 
   2   8   1  258.72    5.38 
   2   8   1  255.81    4.90 
   2   8   1  262.54    4.40 
  -2   8  -1  248.07    5.25 
  -2   8  -1  260.40    4.89 
  -2   8  -1  264.34    5.41 
  -2   8  -1  250.75    5.09 
   3  -8   1    0.10    0.06 
   3  -8   1    0.16    0.06 
   3  -8   1    0.02    0.06 
  -3  -8  -1    0.18    0.04 
   3  -8   1    0.20    0.08 
  -3  -8  -1    0.11    0.05 
   3   8   1    0.10    0.06 
  -3   8  -1    0.06    0.07 
  -3   8  -1    0.30    0.08 
   3   8   1    0.28    0.06 
   3   8   1    0.04    0.07 
  -3   8  -1    0.10    0.06 
   3   8   1    0.22    0.05 
   3   8   1    0.11    0.05 
   4  -8   1  133.82    2.80 
   4  -8   1  130.51    2.99 
   4  -8   1  131.05    2.81 
  -4  -8  -1  135.36    2.73 
  -4  -8  -1  138.48    2.41 
   4  -8   1  135.55    2.69 
  -4   8  -1  144.40    2.97 
   4   8   1  140.52    2.80 
  -4   8  -1  134.79    2.81 
   4   8   1  135.67    2.88 
   4   8   1  138.40    2.75 
   4   8   1  136.94    2.44 
  -5  -8  -1    1.98    0.15 
   5  -8   1    1.96    0.18 
  -5  -8  -1    1.86    0.15 
   5  -8   1    1.66    0.22 
   5  -8   1    1.78    0.20 
   5  -8   1    2.05    0.17 
   5   8   1    1.85    0.18 
   5   8   1    2.05    0.17 
  -5   8  -1    1.69    0.18 
  -5   8  -1    1.78    0.20 
   5   8   1    1.68    0.19 
   5   8   1    1.91    0.16 
   6  -8   1   89.17    1.96 
  -6  -8  -1   88.73    1.90 
   6  -8   1   91.74    1.90 
   6  -8   1   89.04    2.01 
   6  -8   1   87.85    2.11 
   6   8   1   90.06    1.93 
   6   8   1   91.97    1.93 
  -6   8  -1   93.24    2.06 
  -6   8  -1   88.20    1.98 
   6   8   1   89.16    1.75 
   6   8   1   89.18    2.02 
  -7  -8  -1   19.43    0.57 
   7  -8   1   19.01    0.62 
   7  -8   1   18.61    0.66 
   7  -8   1   18.76    0.61 
   7  -8   1   19.50    0.71 
   7   8   1   19.37    0.60 
   7   8   1   19.68    0.58 
  -7   8  -1   20.43    0.64 
   7   8   1   19.49    0.64 
   7   8   1   19.57    0.62 
   8  -8   1   34.53    1.08 
  -8  -8  -1   34.23    0.91 
   8  -8   1   34.81    0.97 
   8  -8   1   35.21    1.03 
   8  -8   1   35.78    0.88 
   8   8   1   34.66    0.93 
  -8   8  -1   35.21    0.96 
   8   8   1   33.53    1.00 
   8   8   1   33.87    0.91 
   8   8   1   35.18    0.97 
   9  -8   1   19.34    0.84 
  -9  -8  -1   19.74    0.69 
   9  -8   1   20.20    0.79 
   9  -8   1   20.30    0.70 
   9   8   1   20.34    0.70 
  -9   8  -1   20.93    0.70 
   9   8   1   19.97    0.80 
   9   8   1   20.97    0.78 
   9   8   1   20.45    0.75 
  10  -8   1    5.52    0.58 
  10  -8   1    5.51    0.65 
  10  -8   1    4.83    0.44 
  10   8   1    5.06    0.61 
  10   8   1    5.72    0.61 
  10   8   1    4.48    0.65 
  10  -9  -1   33.11    1.23 
  10  -9  -1   32.37    0.97 
  10  -9  -1   31.82    1.12 
  10   9  -1   31.35    1.17 
  10   9  -1   33.04    1.09 
  10   9  -1   30.95    1.04 
   9  -9  -1    1.46    0.30 
   9  -9  -1    1.03    0.31 
   9  -9  -1    1.15    0.27 
   9  -9  -1    1.10    0.30 
   9   9  -1    1.33    0.30 
   9   9  -1    0.88    0.31 
   9   9  -1    1.10    0.30 
   8  -9  -1  106.67    2.06 
   8  -9  -1  103.39    2.54 
  -8  -9   1  100.96    2.25 
   8  -9  -1  103.24    2.40 
   8  -9  -1  104.11    2.29 
   8   9  -1  103.82    2.23 
  -8   9   1  109.02    2.45 
   8   9  -1  105.88    2.12 
   8   9  -1  106.92    2.33 
   7  -9  -1    3.17    0.29 
  -7  -9   1    2.94    0.24 
   7  -9  -1    3.80    0.36 
   7  -9  -1    4.09    0.32 
   7  -9  -1    3.41    0.28 
   7   9  -1    3.39    0.31 
   7   9  -1    3.88    0.23 
  -7   9   1    3.38    0.32 
   7   9  -1    3.52    0.30 
   7   9  -1    3.06    0.33 
   6  -9  -1   38.51    0.84 
   6  -9  -1   35.29    1.04 
  -6  -9   1   36.82    0.82 
   6  -9  -1   36.95    0.98 
  -6  -9   1   36.90    0.87 
   6  -9  -1   38.69    0.93 
   6  -9  -1   36.79    0.91 
   6   9  -1   37.59    0.99 
   6   9  -1   38.65    0.92 
   6   9  -1   36.23    0.86 
  -6   9   1   39.33    1.02 
   6   9  -1   38.88    0.85 
  -6   9   1   36.24    0.95 
  -5  -9   1    0.82    0.11 
  -5  -9   1    0.97    0.13 
   5  -9  -1    0.95    0.14 
  -5  -9   1    1.03    0.11 
   5  -9  -1    0.84    0.16 
  -5  -9   1    0.98    0.10 
   5  -9  -1    0.97    0.16 
   5  -9  -1    1.05    0.13 
   5   9  -1    1.17    0.15 
   5   9  -1    1.10    0.15 
  -5   9   1    0.81    0.13 
   5   9  -1    1.14    0.13 
  -5   9   1    0.94    0.15 
   5   9  -1    1.06    0.11 
  -4  -9   1    8.57    0.24 
   4  -9  -1    7.53    0.30 
   4  -9  -1    7.57    0.31 
  -4  -9   1    7.65    0.25 
   4  -9  -1    7.81    0.34 
   4  -9  -1    7.65    0.26 
  -4  -9   1    8.06    0.25 
  -4  -9   1    8.41    0.24 
  -4   9   1    7.67    0.29 
   4   9  -1    7.56    0.30 
   4   9  -1    7.90    0.25 
   4   9  -1    7.98    0.21 
   4   9  -1    7.91    0.28 
  -4   9   1    7.56    0.29 
  -4   9   1    8.32    0.34 
   3  -9  -1    7.18    0.26 
  -3  -9   1    7.27    0.24 
  -3  -9   1    7.33    0.20 
  -3  -9   1    7.29    0.22 
   3  -9  -1    7.17    0.22 
  -3  -9   1    7.10    0.23 
   3  -9  -1    7.26    0.26 
   3  -9  -1    7.23    0.30 
   3   9  -1    7.17    0.24 
   3   9  -1    7.29    0.28 
   3   9  -1    7.76    0.27 
  -3   9   1    7.03    0.26 
  -3   9   1    6.86    0.25 
  -3   9   1    7.56    0.31 
   2  -9  -1  136.15    2.95 
  -2  -9   1  139.04    2.70 
   2  -9  -1  135.16    2.77 
  -2  -9   1  142.94    2.75 
   2  -9  -1  133.04    2.74 
  -2  -9   1  139.79    2.91 
  -2  -9   1  137.39    2.40 
  -2  -9   1  142.74    2.89 
   2   9  -1  136.04    2.41 
  -2   9   1  138.73    2.68 
   2   9  -1  139.47    2.92 
   2   9  -1  134.95    2.69 
  -2   9   1  134.93    2.77 
  -2   9   1  138.90    2.97 
  -1  -9   1    3.62    0.10 
  -1  -9   1    3.71    0.17 
   1  -9  -1    3.76    0.12 
   1  -9  -1    3.55    0.16 
  -1  -9   1    3.57    0.15 
   1  -9  -1    3.73    0.17 
  -1  -9   1    3.61    0.16 
   1  -9  -1    3.58    0.16 
  -1  -9   1    3.60    0.13 
   1  -9  -1    3.63    0.13 
   1   9  -1    3.90    0.14 
   1   9  -1    3.48    0.17 
   1   9  -1    3.59    0.16 
   1   9  -1    3.86    0.17 
  -1   9   1    3.88    0.19 
   0  -9  -1   50.15    1.01 
   0  -9  -1   51.35    1.11 
   0  -9  -1   50.01    0.89 
   0  -9   1   49.06    1.02 
   0  -9  -1   51.25    1.10 
   0  -9   1   50.55    0.92 
   0  -9   1   51.89    1.12 
   0  -9  -1   49.90    1.03 
   0  -9   1   49.25    1.03 
   0  -9   1   50.57    1.15 
   0   9   1   49.78    1.14 
   0   9   1   48.37    1.03 
   0   9  -1   50.44    0.92 
   0   9   1   48.97    1.01 
   0   9  -1   48.29    1.03 
   0   9   1   50.76    1.11 
   0   9  -1   51.36    1.13 
   0   9  -1   50.01    1.15 
   0   9   1   50.67    0.90 
  -1  -9  -1   26.33    0.57 
   1  -9   1   26.18    0.58 
   1  -9   1   25.71    0.51 
  -1  -9  -1   26.55    0.57 
  -1  -9  -1   26.14    0.59 
   1  -9   1   25.24    0.63 
   1  -9   1   24.74    0.66 
  -1  -9  -1   25.88    0.50 
  -1  -9  -1   26.04    0.58 
   1  -9   1   25.21    0.58 
  -1   9  -1   25.43    0.55 
  -1   9  -1   24.81    0.58 
   1   9   1   26.23    0.60 
   1   9   1   25.58    0.50 
   1   9   1   25.09    0.62 
  -1   9  -1   26.49    0.58 
  -1   9  -1   25.71    0.67 
   2  -9   1    2.02    0.16 
   2  -9   1    1.91    0.10 
   2  -9   1    1.87    0.14 
   2  -9   1    2.01    0.13 
   2  -9   1    1.81    0.12 
  -2  -9  -1    1.67    0.10 
  -2  -9  -1    2.24    0.11 
  -2   9  -1    1.99    0.16 
   2   9   1    1.78    0.11 
  -2   9  -1    2.05    0.11 
   2   9   1    2.15    0.12 
  -2   9  -1    1.86    0.12 
   2   9   1    1.92    0.14 
   2   9   1    2.33    0.12 
   2   9   1    1.97    0.11 
  -2   9  -1    1.91    0.13 
  -3  -9  -1    2.57    0.14 
   3  -9   1    2.89    0.18 
   3  -9   1    2.97    0.16 
   3  -9   1    2.77    0.14 
  -3  -9  -1    2.56    0.11 
   3  -9   1    2.65    0.20 
   3   9   1    2.49    0.17 
   3   9   1    2.57    0.14 
  -3   9  -1    2.81    0.19 
  -3   9  -1    2.69    0.16 
   3   9   1    2.66    0.12 
   3   9   1    2.75    0.14 
  -3   9  -1    2.45    0.16 
   3   9   1    3.29    0.16 
   4  -9   1   14.46    0.43 
   4  -9   1   14.35    0.45 
  -4  -9  -1   14.82    0.37 
   4  -9   1   14.48    0.41 
   4  -9   1   14.24    0.50 
  -4  -9  -1   14.16    0.37 
  -4   9  -1   14.51    0.42 
   4   9   1   13.63    0.44 
   4   9   1   14.80    0.38 
  -4   9  -1   14.35    0.44 
   4   9   1   14.84    0.39 
   4   9   1   14.48    0.40 
   4   9   1   14.27    0.40 
  -4   9  -1   15.17    0.48 
   5  -9   1   12.00    0.38 
   5  -9   1   11.54    0.43 
   5  -9   1   12.47    0.40 
  -5  -9  -1   11.77    0.35 
   5  -9   1   11.15    0.46 
  -5  -9  -1   11.42    0.34 
  -5   9  -1   10.93    0.41 
   5   9   1   11.41    0.36 
   5   9   1   12.14    0.37 
  -5   9  -1   11.93    0.45 
   5   9   1   11.43    0.38 
   5   9   1   11.14    0.38 
   6  -9   1    0.89    0.16 
   6  -9   1    0.91    0.19 
   6  -9   1    0.93    0.18 
   6  -9   1    1.04    0.16 
  -6  -9  -1    0.99    0.13 
  -6   9  -1    0.70    0.14 
   6   9   1    0.99    0.18 
   6   9   1    0.79    0.15 
  -6   9  -1    0.53    0.15 
   6   9   1    0.74    0.15 
   6   9   1    0.93    0.14 
  -7  -9  -1    3.00    0.25 
   7  -9   1    3.37    0.31 
   7  -9   1    3.73    0.36 
   7  -9   1    3.56    0.28 
   7  -9   1    3.67    0.34 
   7   9   1    2.73    0.31 
   7   9   1    3.39    0.27 
   7   9   1    3.22    0.29 
   7   9   1    3.41    0.32 
  -7   9  -1    3.24    0.31 
  -8  -9  -1   49.38    1.23 
   8  -9   1   51.57    1.37 
   8  -9   1   50.51    1.28 
   8  -9   1   49.93    1.43 
   8  -9   1   52.31    1.17 
  -8   9  -1   55.10    1.33 
   8   9   1   52.58    1.29 
   8   9   1   52.19    1.23 
   8   9   1   49.59    1.34 
   8   9   1   51.25    1.24 
   9  -9   1    6.88    0.48 
  -9  -9  -1    6.45    0.49 
   9  -9   1    6.75    0.59 
   9  -9   1    6.81    0.51 
   9   9   1    6.49    0.47 
   9   9   1    6.31    0.55 
  -9   9  -1    5.94    0.48 
   9   9   1    6.99    0.54 
   9   9   1    7.43    0.52 
  10  -9   1   53.64    1.31 
  10  -9   1   52.70    1.61 
  10   9   1   52.15    1.46 
  10   9   1   50.13    1.53 
  10   9   1   51.96    1.44 
  10 -10  -1    5.17    0.68 
  10 -10  -1    3.65    0.42 
  10  10  -1    4.73    0.52 
  10  10  -1    3.69    0.50 
   9 -10  -1   67.61    1.87 
   9 -10  -1   72.91    1.53 
   9 -10  -1   65.16    1.67 
   9 -10  -1   68.15    1.77 
   9  10  -1   67.45    1.59 
  -9  10   1   70.95    1.77 
   9  10  -1   68.30    1.58 
   9  10  -1   71.49    1.70 
   9  10  -1   67.97    1.81 
   8 -10  -1    2.25    0.27 
   8 -10  -1    2.67    0.36 
   8 -10  -1    2.60    0.33 
   8 -10  -1    3.10    0.34 
  -8 -10   1    2.87    0.31 
   8  10  -1    3.05    0.27 
   8  10  -1    3.32    0.35 
   8  10  -1    2.44    0.31 
   8  10  -1    2.83    0.33 
  -7 -10   1  123.19    2.62 
   7 -10  -1  127.36    2.64 
   7 -10  -1  122.85    2.76 
   7 -10  -1  126.11    2.70 
   7 -10  -1  120.30    2.92 
  -7  10   1  122.40    2.72 
  -7  10   1  131.21    2.88 
   7  10  -1  127.85    2.68 
   7  10  -1  133.50    2.62 
   7  10  -1  125.54    2.85 
   7  10  -1  127.53    2.43 
   6 -10  -1    1.30    0.16 
   6 -10  -1    1.22    0.18 
  -6 -10   1    1.23    0.17 
   6 -10  -1    1.12    0.19 
   6 -10  -1    1.51    0.19 
  -6 -10   1    1.41    0.16 
  -6  10   1    1.26    0.18 
   6  10  -1    1.45    0.17 
  -6  10   1    1.45    0.20 
   6  10  -1    1.43    0.19 
   6  10  -1    1.33    0.15 
   6  10  -1    1.30    0.19 
  -5 -10   1   68.19    1.30 
  -5 -10   1   66.58    1.42 
   5 -10  -1   65.99    1.46 
   5 -10  -1   66.10    1.53 
   5 -10  -1   64.44    1.63 
   5 -10  -1   66.47    1.46 
  -5  10   1   66.60    1.51 
  -5  10   1   70.62    1.62 
   5  10  -1   67.42    1.34 
   5  10  -1   67.34    1.56 
   5  10  -1   69.56    1.45 
   5  10  -1   68.70    1.40 
   4 -10  -1    1.69    0.18 
   4 -10  -1    1.62    0.13 
   4 -10  -1    1.63    0.20 
   4 -10  -1    1.62    0.17 
  -4 -10   1    1.63    0.12 
  -4 -10   1    1.76    0.11 
  -4 -10   1    1.54    0.11 
   4  10  -1    1.72    0.17 
  -4  10   1    1.66    0.16 
   4  10  -1    1.54    0.18 
   4  10  -1    1.56    0.13 
   4  10  -1    1.58    0.16 
  -4  10   1    1.58    0.19 
  -4  10   1    1.68    0.16 
   3 -10  -1  130.51    2.93 
  -3 -10   1  137.03    2.83 
   3 -10  -1  136.11    2.65 
   3 -10  -1  131.63    2.74 
  -3 -10   1  133.22    2.65 
  -3 -10   1  139.79    2.82 
   3 -10  -1  130.82    2.70 
  -3 -10   1  134.59    2.37 
   3  10  -1  133.95    2.67 
   3  10  -1  136.14    2.88 
   3  10  -1  132.04    2.39 
  -3  10   1  132.34    2.64 
  -3  10   1  139.10    2.94 
  -3  10   1  132.98    2.74 
   2 -10  -1    4.57    0.18 
  -2 -10   1    4.63    0.14 
   2 -10  -1    4.64    0.13 
   2 -10  -1    4.59    0.20 
  -2 -10   1    4.83    0.19 
  -2 -10   1    5.00    0.17 
  -2 -10   1    4.91    0.18 
   2 -10  -1    4.95    0.23 
  -2  10   1    4.62    0.18 
  -2  10   1    4.83    0.24 
  -2  10   1    4.33    0.19 
   2  10  -1    4.85    0.21 
   2  10  -1    4.99    0.18 
   2  10  -1    4.71    0.20 
  -1 -10   1   72.03    1.30 
   1 -10  -1   72.89    1.28 
  -1 -10   1   71.96    1.46 
   1 -10  -1   72.44    1.47 
   1 -10  -1   73.12    1.60 
   1 -10  -1   72.29    1.46 
  -1 -10   1   72.63    1.59 
   1 -10  -1   73.27    1.59 
  -1 -10   1   73.16    1.57 
   1  10  -1   72.52    1.47 
   1  10  -1   70.89    1.59 
  -1  10   1   71.85    1.63 
  -1  10   1   71.79    1.48 
   1  10  -1   72.66    1.31 
  -1  10   1   72.47    1.47 
   1  10  -1   72.11    1.61 
   0 -10   1   33.87    0.83 
   0 -10   1   33.85    0.72 
   0 -10  -1   34.66    0.80 
   0 -10  -1   34.62    0.70 
   0 -10   1   34.01    0.66 
   0 -10  -1   33.97    0.64 
   0 -10  -1   34.14    0.75 
   0 -10   1   34.68    0.75 
   0 -10  -1   35.48    0.78 
   0 -10   1   35.25    0.81 
   0  10   1   34.47    0.64 
   0  10  -1   34.64    0.66 
   0  10   1   35.21    0.81 
   0  10   1   34.14    0.83 
   0  10   1   34.18    0.75 
   0  10  -1   35.17    0.82 
   0  10  -1   34.16    0.84 
   0  10   1   34.56    0.71 
   0  10  -1   32.93    0.75 
   1 -10   1   40.59    0.77 
   1 -10   1   39.06    0.95 
  -1 -10  -1   40.94    0.75 
   1 -10   1   39.49    0.97 
  -1 -10  -1   40.46    0.88 
  -1 -10  -1   42.10    0.89 
  -1 -10  -1   40.56    0.88 
   1 -10   1   39.41    0.87 
  -1 -10  -1   42.46    0.88 
   1 -10   1   40.03    0.87 
  -1  10  -1   40.04    0.84 
   1  10   1   40.06    0.91 
   1  10   1   41.11    0.94 
  -1  10  -1   40.96    0.87 
   1  10   1   39.77    0.88 
  -1  10  -1   41.79    0.99 
   1  10   1   40.03    0.76 
  -1  10  -1   40.89    0.87 
   2 -10   1    6.77    0.24 
   2 -10   1    6.60    0.24 
   2 -10   1    7.10    0.21 
   2 -10   1    7.22    0.29 
  -2 -10  -1    7.18    0.20 
   2 -10   1    6.83    0.27 
  -2 -10  -1    7.26    0.22 
  -2  10  -1    6.88    0.24 
  -2  10  -1    6.99    0.21 
  -2  10  -1    6.93    0.24 
   2  10   1    7.28    0.23 
  -2  10  -1    7.51    0.30 
   2  10   1    7.37    0.24 
   2  10   1    6.99    0.26 
   2  10   1    6.79    0.21 
   3 -10   1    4.40    0.21 
   3 -10   1    4.34    0.21 
  -3 -10  -1    4.32    0.17 
   3 -10   1    4.32    0.18 
   3 -10   1    4.32    0.25 
   3  10   1    4.25    0.14 
  -3  10  -1    4.42    0.25 
   3  10   1    4.40    0.22 
   3  10   1    4.43    0.19 
   3  10   1    3.96    0.17 
  -3  10  -1    4.37    0.21 
  -3  10  -1    4.87    0.22 
   3  10   1    4.29    0.18 
  -4 -10  -1    0.42    0.09 
   4 -10   1    0.25    0.08 
  -4 -10  -1    0.51    0.07 
   4 -10   1    0.13    0.11 
   4 -10   1    0.33    0.11 
   4  10   1    0.41    0.09 
   4  10   1    0.57    0.12 
   4  10   1    0.35    0.08 
   4  10   1    0.22    0.07 
   4  10   1    0.37    0.10 
  -4  10  -1    0.48    0.10 
  -4  10  -1    0.30    0.11 
   5 -10   1    9.12    0.33 
   5 -10   1    8.95    0.38 
  -5 -10  -1    9.08    0.30 
   5 -10   1    8.49    0.41 
   5 -10   1    9.49    0.36 
  -5 -10  -1    9.06    0.29 
   5  10   1    8.26    0.38 
   5  10   1    9.25    0.31 
   5  10   1    8.60    0.33 
   5  10   1    9.13    0.31 
  -5  10  -1    9.80    0.40 
   5  10   1    8.66    0.34 
  -5  10  -1    8.98    0.36 
   6 -10   1    0.08    0.12 
   6 -10   1    0.23    0.12 
   6 -10   1    0.28    0.14 
   6 -10   1    0.30    0.16 
  -6 -10  -1    0.47    0.11 
  -6  10  -1   -0.02    0.13 
   6  10   1    0.30    0.13 
  -6  10  -1    0.32    0.13 
   6  10   1    0.33    0.12 
   6  10   1    0.22    0.14 
   6  10   1    0.34    0.12 
   7 -10   1   53.70    1.27 
   7 -10   1   50.46    1.41 
  -7 -10  -1   50.77    1.20 
   7 -10   1   52.89    1.34 
   7 -10   1   52.21    1.27 
   7  10   1   53.07    1.23 
   7  10   1   51.23    1.31 
  -7  10  -1   55.36    1.35 
   7  10   1   52.98    1.19 
   7  10   1   54.26    1.26 
   8 -10   1    5.33    0.49 
   8 -10   1    5.71    0.38 
  -8 -10  -1    4.75    0.35 
   8 -10   1    5.12    0.43 
   8 -10   1    5.70    0.48 
  -8  10  -1    4.12    0.40 
   8  10   1    5.01    0.44 
   8  10   1    5.32    0.43 
   8  10   1    5.89    0.39 
   8  10   1    6.22    0.41 
   9 -10   1   71.30    1.96 
   9 -10   1   73.18    1.86 
   9 -10   1   75.96    1.60 
   9  10   1   74.53    1.78 
   9  10   1   71.77    1.71 
   9  10   1   74.13    1.67 
   9  10   1   70.26    1.86 
  -9  10  -1   74.00    1.80 
  10 -10   1    2.09    0.35 
  10 -10   1    2.95    0.47 
  10  10   1    1.77    0.45 
  10  11  -1   17.42    0.93 
   9 -11  -1    2.18    0.38 
   9 -11  -1    1.82    0.30 
   9 -11  -1    1.81    0.34 
   9 -11  -1    1.67    0.32 
   9  11  -1    1.82    0.34 
  -9  11   1    1.49    0.34 
   9  11  -1    1.94    0.36 
   9  11  -1    1.50    0.30 
   8 -11  -1   22.84    0.74 
   8 -11  -1   24.28    0.90 
   8 -11  -1   25.24    0.72 
   8 -11  -1   24.53    0.84 
  -8 -11   1   24.69    0.71 
   8  11  -1   26.22    0.78 
   8  11  -1   24.34    0.85 
   8  11  -1   25.85    0.78 
   8  11  -1   24.98    0.66 
   7 -11  -1    1.60    0.26 
   7 -11  -1    1.61    0.26 
   7 -11  -1    1.71    0.22 
   7 -11  -1    2.13    0.23 
  -7 -11   1    1.66    0.21 
  -7 -11   1    1.54    0.18 
   7 -11  -1    2.04    0.25 
   7  11  -1    1.99    0.20 
  -7  11   1    1.54    0.23 
   7  11  -1    1.59    0.24 
   7  11  -1    1.99    0.23 
  -7  11   1    1.84    0.25 
   7  11  -1    1.59    0.23 
  -6 -11   1   34.24    0.79 
  -6 -11   1   35.30    0.83 
   6 -11  -1   35.48    0.91 
   6 -11  -1   34.86    0.95 
  -6  11   1   37.91    1.01 
  -6  11   1   34.19    0.93 
   6  11  -1   35.25    0.85 
   6  11  -1   35.13    0.96 
   6  11  -1   36.72    0.80 
   6  11  -1   36.65    0.87 
   5 -11  -1   18.23    0.57 
   5 -11  -1   18.83    0.56 
  -5 -11   1   18.25    0.47 
   5 -11  -1   18.47    0.50 
   5 -11  -1   18.40    0.63 
  -5 -11   1   18.78    0.48 
   5  11  -1   18.40    0.59 
   5  11  -1   19.61    0.43 
   5  11  -1   18.31    0.51 
   5  11  -1   18.41    0.57 
   5  11  -1   18.32    0.49 
  -5  11   1   18.99    0.57 
  -5  11   1   18.78    0.62 
  -4 -11   1   42.73    0.92 
   4 -11  -1   41.85    1.11 
   4 -11  -1   42.81    0.96 
   4 -11  -1   43.23    1.03 
  -4 -11   1   45.99    0.96 
  -4 -11   1   42.93    0.88 
   4 -11  -1   43.87    1.00 
  -4 -11   1   45.16    0.97 
   4  11  -1   43.22    1.02 
  -4  11   1   43.38    0.99 
   4  11  -1   44.01    0.91 
  -4  11   1   44.77    1.12 
  -4  11   1   41.69    1.06 
   4  11  -1   44.29    1.06 
   3 -11  -1  131.51    2.94 
   3 -11  -1  133.29    2.74 
  -3 -11   1  130.67    2.64 
  -3 -11   1  137.58    2.83 
   3 -11  -1  133.42    2.66 
  -3 -11   1  138.02    2.82 
   3 -11  -1  133.22    2.70 
  -3 -11   1  138.36    2.38 
   3  11  -1  132.73    2.88 
   3  11  -1  135.03    2.68 
  -3  11   1  132.79    2.74 
  -3  11   1  135.13    2.95 
   3  11  -1  133.72    2.40 
  -3  11   1  133.66    2.65 
  -2 -11   1    4.40    0.19 
  -2 -11   1    4.58    0.14 
   2 -11  -1    4.39    0.18 
  -2 -11   1    4.38    0.18 
  -2 -11   1    4.73    0.17 
   2 -11  -1    4.63    0.21 
   2 -11  -1    4.63    0.23 
   2  11  -1    4.76    0.21 
  -2  11   1    4.61    0.25 
   2  11  -1    4.19    0.18 
  -2  11   1    4.08    0.20 
  -1 -11   1  162.78    2.84 
  -1 -11   1  166.10    3.47 
  -1 -11   1  167.13    3.44 
   1 -11  -1  165.40    3.48 
  -1 -11   1  168.38    3.17 
   1 -11  -1  164.68    3.45 
   1 -11  -1  162.27    3.17 
   1 -11  -1  161.47    3.24 
   1 -11  -1  164.53    2.81 
   1  11  -1  161.67    3.46 
  -1  11   1  165.41    3.51 
   1  11  -1  160.33    3.17 
   1  11  -1  159.05    2.84 
  -1  11   1  161.15    3.25 
   1  11  -1  166.54    3.49 
  -1  11   1  162.81    3.17 
   0 -11   1    7.87    0.29 
   0 -11   1    8.16    0.27 
   0 -11  -1    7.93    0.19 
   0 -11  -1    8.02    0.26 
   0 -11  -1    7.95    0.20 
   0 -11   1    7.80    0.22 
   0 -11   1    8.13    0.26 
   0 -11  -1    7.93    0.25 
   0 -11  -1    8.24    0.26 
   0 -11   1    7.71    0.21 
   0  11   1    8.07    0.29 
   0  11  -1    8.25    0.23 
   0  11   1    7.75    0.20 
   0  11   1    7.61    0.20 
   0  11  -1    7.97    0.30 
   0  11   1    7.82    0.27 
   0  11  -1    7.75    0.28 
   1 -11   1  274.66    5.19 
   1 -11   1  260.83    5.48 
   1 -11   1  272.30    5.69 
  -1 -11  -1  279.95    5.71 
  -1 -11  -1  271.66    4.64 
  -1 -11  -1  281.00    5.19 
  -1 -11  -1  277.47    5.71 
   1 -11   1  269.23    5.73 
  -1 -11  -1  273.16    5.61 
   1 -11   1  276.46    4.66 
   1  11   1  273.77    5.69 
  -1  11  -1  261.57    5.47 
  -1  11  -1  268.78    5.18 
   1  11   1  265.90    5.19 
   1  11   1  274.09    5.66 
  -1  11  -1  274.75    5.47 
  -1  11  -1  281.60    5.75 
   1  11   1  272.24    4.79 
  -2 -11  -1   -0.01    0.05 
   2 -11   1    0.02    0.07 
   2 -11   1    0.04    0.06 
   2 -11   1    0.17    0.07 
   2 -11   1    0.08    0.04 
   2 -11   1    0.12    0.07 
  -2 -11  -1    0.11    0.05 
  -2  11  -1    0.15    0.05 
   2  11   1    0.04    0.06 
   2  11   1    0.20    0.08 
   2  11   1    0.05    0.05 
  -2  11  -1    0.11    0.07 
  -2  11  -1    0.12    0.09 
  -2  11  -1    0.21    0.07 
   2  11   1    0.13    0.06 
   3 -11   1  153.17    3.20 
   3 -11   1  159.93    3.18 
   3 -11   1  151.07    3.39 
   3 -11   1  157.86    3.09 
   3 -11   1  153.46    3.43 
  -3 -11  -1  156.43    2.75 
  -3  11  -1  158.47    3.08 
   3  11   1  158.91    2.78 
   3  11   1  157.84    3.32 
   3  11   1  159.40    3.09 
   3  11   1  161.88    3.21 
   3  11   1  155.19    3.11 
  -3  11  -1  158.49    3.21 
  -3  11  -1  165.13    3.44 
  -4 -11  -1    1.01    0.12 
   4 -11   1    1.02    0.13 
  -4 -11  -1    0.89    0.10 
   4 -11   1    0.88    0.16 
   4 -11   1    0.98    0.15 
   4 -11   1    0.82    0.13 
   4  11   1    0.62    0.12 
   4  11   1    0.79    0.11 
  -4  11  -1    0.88    0.15 
   4  11   1    0.91    0.11 
   4  11   1    1.06    0.11 
  -4  11  -1    0.79    0.13 
  -4  11  -1    0.84    0.14 
   4  11   1    0.86    0.14 
   5 -11   1   83.97    2.06 
   5 -11   1   85.41    1.93 
  -5 -11  -1   86.59    1.63 
   5 -11   1   89.31    1.88 
  -5 -11  -1   87.65    1.81 
   5 -11   1   86.98    1.84 
  -5  11  -1   86.52    1.92 
   5  11   1   85.75    1.87 
   5  11   1   89.23    1.82 
   5  11   1   87.55    1.85 
   5  11   1   86.70    1.94 
   5  11   1   87.60    1.68 
  -5  11  -1   93.01    2.04 
   6 -11   1   10.10    0.38 
  -6 -11  -1    9.59    0.34 
  -6 -11  -1    9.53    0.33 
   6 -11   1    9.93    0.42 
  -6  11  -1    9.79    0.44 
   6  11   1    9.96    0.36 
   6  11   1    9.63    0.35 
   6  11   1    9.24    0.39 
   6  11   1    9.05    0.39 
  -6  11  -1    9.12    0.41 
   7 -11   1   43.54    1.10 
   7 -11   1   42.31    1.24 
   7 -11   1   43.93    1.17 
  -7 -11  -1   42.73    1.02 
   7 -11   1   42.91    1.09 
  -7  11  -1   41.53    1.12 
   7  11   1   43.99    1.05 
   7  11   1   45.15    1.07 
   7  11   1   42.59    1.04 
   7  11   1   42.62    1.13 
  -7  11  -1   45.24    1.17 
  -8 -11  -1   21.92    0.66 
   8 -11   1   22.41    0.67 
   8 -11   1   22.26    0.79 
   8 -11   1   21.06    0.84 
   8  11   1   21.43    0.69 
  -8  11  -1   21.85    0.76 
   8  11   1   21.49    0.76 
   8  11   1   23.80    0.73 
   8  11   1   21.08    0.73 
   9 -11   1   16.91    0.64 
   9 -11   1   17.04    0.75 
   9 -11   1   15.79    0.79 
   9  11   1   17.27    0.71 
   9  11   1   15.50    0.75 
   9  11   1   16.35    0.72 
   9 -12  -1    1.41    0.30 
   9 -12  -1    1.05    0.32 
   9 -12  -1    0.87    0.31 
   9 -12  -1    1.37    0.31 
  -9  12   1    0.72    0.34 
   9  12  -1    1.12    0.34 
   9  12  -1    1.03    0.31 
   9  12  -1    1.39    0.35 
   8 -12  -1    2.44    0.34 
   8 -12  -1    2.30    0.29 
   8 -12  -1    2.88    0.33 
   8 -12  -1    3.14    0.34 
  -8 -12   1    2.63    0.30 
   8  12  -1    3.06    0.35 
   8  12  -1    3.42    0.37 
   8  12  -1    2.94    0.41 
  -8  12   1    2.55    0.33 
   8  12  -1    2.50    0.24 
   7 -12  -1    0.63    0.17 
  -7 -12   1    0.46    0.15 
  -7 -12   1    0.59    0.16 
   7 -12  -1    0.53    0.20 
   7 -12  -1    0.47    0.18 
   7 -12  -1    0.51    0.19 
   7 -12  -1    0.65    0.17 
   7  12  -1    0.48    0.12 
  -7  12   1    0.48    0.20 
   7  12  -1    0.57    0.18 
   7  12  -1    0.50    0.20 
   7  12  -1    0.81    0.21 
   6 -12  -1    3.86    0.34 
  -6 -12   1    3.32    0.20 
   6 -12  -1    3.41    0.28 
  -6 -12   1    3.59    0.24 
  -6  12   1    3.53    0.28 
  -6  12   1    4.18    0.33 
   6  12  -1    3.43    0.24 
   6  12  -1    3.25    0.30 
   6  12  -1    3.17    0.32 
  -5 -12   1    0.08    0.08 
   5 -12  -1    0.07    0.11 
  -5 -12   1    0.29    0.10 
   5 -12  -1    0.14    0.10 
   5 -12  -1    0.25    0.09 
   5 -12  -1    0.12    0.13 
   5  12  -1    0.17    0.13 
  -5  12   1    0.08    0.12 
   5  12  -1    0.45    0.13 
   5  12  -1    0.05    0.11 
   5  12  -1    0.06    0.09 
  -5  12   1    0.18    0.14 
  -4 -12   1   23.91    0.55 
  -4 -12   1   22.46    0.53 
  -4 -12   1   22.91    0.52 
   4 -12  -1   22.96    0.62 
   4 -12  -1   22.65    0.70 
  -4 -12   1   23.95    0.54 
   4 -12  -1   22.61    0.55 
   4 -12  -1   23.07    0.63 
  -4  12   1   24.21    0.71 
   4  12  -1   23.07    0.57 
  -4  12   1   22.72    0.61 
   4  12  -1   22.60    0.64 
   4  12  -1   23.49    0.64 
  -4  12   1   21.34    0.63 
   3 -12  -1    6.44    0.31 
  -3 -12   1    6.25    0.22 
  -3 -12   1    6.01    0.23 
   3 -12  -1    5.96    0.25 
   3 -12  -1    5.96    0.19 
  -3 -12   1    5.92    0.21 
  -3  12   1    6.04    0.25 
   3  12  -1    6.05    0.27 
   3  12  -1    5.84    0.24 
   3  12  -1    6.11    0.27 
  -3  12   1    5.97    0.26 
  -2 -12   1  355.61    7.28 
  -2 -12   1  364.44    7.31 
   2 -12  -1  353.92    6.69 
   2 -12  -1  351.44    7.34 
   2 -12  -1  351.52    7.36 
   2 -12  -1  353.50    6.05 
  -2 -12   1  348.35    6.01 
  -2 -12   1  362.11    7.10 
   2 -12  -1  341.26    6.92 
   2  12  -1  353.68    6.70 
   2  12  -1  349.36    7.32 
  -2  12   1  347.46    6.84 
  -2  12   1  360.84    7.39 
  -2  12   1  341.71    6.98 
   2  12  -1  350.10    6.02 
  -1 -12   1    2.45    0.17 
   1 -12  -1    2.54    0.16 
  -1 -12   1    2.66    0.15 
   1 -12  -1    2.56    0.15 
  -1 -12   1    2.80    0.13 
  -1 -12   1    2.65    0.16 
   1 -12  -1    2.45    0.12 
   1 -12  -1    2.69    0.13 
   1 -12  -1    2.76    0.18 
   1  12  -1    2.24    0.16 
  -1  12   1    2.38    0.16 
   1  12  -1    2.68    0.16 
  -1  12   1    2.38    0.18 
  -1  12   1    2.27    0.12 
   1  12  -1    2.46    0.18 
   1  12  -1    2.52    0.14 
   0 -12  -1  121.60    2.37 
   0 -12   1  115.96    2.37 
   0 -12   1  122.04    2.37 
   0 -12  -1  122.74    2.36 
   0 -12  -1  123.23    2.56 
   0 -12  -1  121.84    2.54 
   0 -12  -1  120.31    2.08 
   0 -12   1  118.29    2.11 
   0 -12   1  120.44    2.57 
   0 -12   1  119.38    2.60 
   0  12   1  118.86    2.37 
   0  12  -1  121.47    2.11 
   0  12  -1  116.97    2.36 
   0  12   1  121.98    2.61 
   0  12  -1  112.65    2.58 
   0  12   1  119.82    2.37 
   0  12   1  120.53    2.57 
   0  12  -1  120.28    2.62 
   0  12   1  119.79    2.09 
  -1 -12  -1    2.70    0.15 
  -1 -12  -1    2.55    0.16 
  -1 -12  -1    2.42    0.12 
   1 -12   1    2.81    0.19 
  -1 -12  -1    3.23    0.14 
   1 -12   1    2.33    0.16 
   1 -12   1    2.39    0.13 
  -1 -12  -1    2.96    0.12 
   1 -12   1    2.52    0.13 
   1 -12   1    2.45    0.16 
   1  12   1    2.53    0.16 
  -1  12  -1    2.74    0.14 
  -1  12  -1    2.81    0.21 
  -1  12  -1    2.78    0.17 
  -1  12  -1    2.89    0.11 
   1  12   1    2.54    0.17 
   1  12   1    2.46    0.13 
  -2 -12  -1  202.17    3.76 
   2 -12   1  194.59    3.86 
  -2 -12  -1  196.43    3.90 
  -2 -12  -1  194.07    3.34 
   2 -12   1  194.92    3.74 
   2 -12   1  189.92    4.11 
   2 -12   1  187.51    4.14 
   2 -12   1  195.38    3.36 
   2 -12   1  184.95    3.86 
  -2  12  -1  195.71    3.74 
   2  12   1  190.09    3.76 
   2  12   1  192.77    3.35 
  -2  12  -1  200.17    4.16 
  -2  12  -1  190.47    3.87 
   2  12   1  193.60    4.06 
   2  12   1  192.32    4.08 
  -3 -12  -1    3.80    0.17 
   3 -12   1    3.70    0.26 
   3 -12   1    3.97    0.22 
  -3 -12  -1    3.95    0.17 
   3 -12   1    4.03    0.17 
   3 -12   1    3.50    0.23 
   3 -12   1    3.95    0.21 
   3  12   1    4.19    0.18 
  -3  12  -1    3.90    0.21 
   3  12   1    3.94    0.19 
  -3  12  -1    4.11    0.21 
   3  12   1    3.92    0.20 
   4 -12   1  176.35    3.58 
   4 -12   1  174.50    3.47 
   4 -12   1  170.96    3.85 
   4 -12   1  175.64    3.61 
   4  12   1  173.50    3.49 
  -4  12  -1  176.47    3.45 
  -4  12  -1  183.43    3.84 
   4  12   1  181.06    3.58 
   4  12   1  178.43    3.48 
   4  12   1  176.14    3.13 
  -4  12  -1  171.03    3.60 
   4  12   1  174.22    3.72 
  -5 -12  -1    1.91    0.14 
   5 -12   1    1.91    0.26 
  -5 -12  -1    2.12    0.18 
   5 -12   1    2.04    0.18 
   5 -12   1    2.12    0.23 
   5 -12   1    2.19    0.23 
   5  12   1    2.23    0.22 
   5  12   1    1.95    0.20 
  -5  12  -1    2.18    0.25 
   5  12   1    2.00    0.17 
   5  12   1    1.55    0.17 
  -5  12  -1    1.70    0.20 
   5  12   1    2.05    0.24 
  -6 -12  -1   21.77    0.56 
   6 -12   1   21.58    0.66 
   6 -12   1   21.62    0.69 
   6 -12   1   22.25    0.62 
  -6 -12  -1   21.80    0.56 
   6 -12   1   21.80    0.75 
   6  12   1   22.92    0.60 
   6  12   1   21.18    0.65 
   6  12   1   21.50    0.65 
  -6  12  -1   21.79    0.67 
  -6  12  -1   22.30    0.72 
   6  12   1   21.13    0.58 
   6  12   1   21.32    0.69 
   7 -12   1    0.40    0.18 
   7 -12   1    0.56    0.20 
   7 -12   1    0.38    0.19 
  -7 -12  -1    0.47    0.16 
   7 -12   1    0.17    0.16 
   7  12   1    0.47    0.17 
   7  12   1    0.11    0.17 
   7  12   1    0.38    0.21 
  -7  12  -1    0.19    0.17 
   7  12   1    0.17    0.15 
   7  12   1    0.48    0.19 
  -7  12  -1    0.41    0.20 
  -8 -12  -1    6.65    0.38 
   8 -12   1    7.05    0.53 
   8 -12   1    7.71    0.42 
   8 -12   1    6.83    0.48 
   8  12   1    8.00    0.44 
   8  12   1    6.76    0.50 
   8  12   1    7.30    0.50 
   8  12   1    6.21    0.40 
   8  12   1    6.95    0.48 
   9 -12   1    0.99    0.33 
   9 -12   1    1.05    0.28 
   9 -12   1    0.97    0.32 
   9  12   1    0.88    0.32 
   9  12   1    1.11    0.33 
   9  12   1    1.10    0.34 
  -9  12  -1    0.46    0.32 
   9  12   1    1.62    0.33 
   9 -13  -1    3.98    0.46 
   9 -13  -1    4.23    0.51 
   9 -13  -1    4.59    0.48 
   9 -13  -1    3.68    0.45 
   9  13  -1    4.37    0.55 
   9  13  -1    4.72    0.55 
   9  13  -1    3.85    0.51 
   9  13  -1    3.65    0.45 
  -8 -13   1    3.67    0.32 
   8 -13  -1    3.88    0.41 
   8 -13  -1    4.41    0.37 
   8 -13  -1    4.56    0.48 
   8 -13  -1    4.81    0.38 
   8  13  -1    4.07    0.46 
   8  13  -1    4.10    0.39 
  -8  13   1    4.44    0.47 
   8  13  -1    4.48    0.43 
   8  13  -1    4.21    0.45 
   7 -13  -1    2.57    0.33 
   7 -13  -1    1.80    0.24 
   7 -13  -1    2.94    0.28 
  -7 -13   1    2.13    0.24 
   7 -13  -1    2.40    0.28 
  -7 -13   1    2.26    0.25 
   7 -13  -1    2.00    0.30 
   7  13  -1    1.90    0.26 
  -7  13   1    2.49    0.29 
   7  13  -1    2.34    0.24 
   7  13  -1    2.43    0.28 
   7  13  -1    2.10    0.28 
  -6 -13   1   36.22    0.83 
   6 -13  -1   36.49    1.08 
   6 -13  -1   37.17    0.90 
  -6 -13   1   36.72    0.85 
   6 -13  -1   37.05    1.00 
   6  13  -1   37.65    1.01 
   6  13  -1   37.60    0.88 
   6  13  -1   36.25    1.00 
   6  13  -1   37.06    0.90 
  -6  13   1   39.82    1.07 
  -6  13   1   35.65    0.97 
  -5 -13   1    9.74    0.33 
   5 -13  -1    8.81    0.38 
   5 -13  -1    9.40    0.32 
  -5 -13   1    9.12    0.28 
   5 -13  -1    9.04    0.44 
   5 -13  -1    9.04    0.39 
   5  13  -1    9.65    0.42 
  -5  13   1    9.28    0.39 
  -5  13   1    9.59    0.38 
   5  13  -1    9.45    0.40 
   5  13  -1    9.70    0.38 
  -5  13   1   10.05    0.45 
  -4 -13   1   96.63    1.98 
  -4 -13   1   94.58    1.74 
   4 -13  -1   93.20    1.96 
  -4 -13   1   91.11    1.88 
   4 -13  -1   92.47    2.01 
   4 -13  -1   90.10    2.17 
  -4 -13   1   97.97    1.99 
   4 -13  -1   94.14    1.94 
   4  13  -1   93.75    2.10 
   4  13  -1   95.02    1.78 
  -4  13   1   94.63    1.95 
  -4  13   1   98.38    2.19 
  -4  13   1   92.04    2.01 
   4  13  -1   92.22    1.98 
   3 -13  -1  118.29    2.36 
   3 -13  -1  115.63    2.58 
   3 -13  -1  119.23    2.37 
  -3 -13   1  115.95    2.10 
   3 -13  -1  114.12    2.42 
  -3 -13   1  120.19    2.50 
   3 -13  -1  114.66    2.61 
  -3 -13   1  120.66    2.48 
  -3  13   1  116.84    2.36 
   3  13  -1  116.05    2.38 
  -3  13   1  118.98    2.64 
   3  13  -1  117.16    2.56 
  -3  13   1  118.52    2.43 
   3  13  -1  116.21    2.13 
  -2 -13   1    0.71    0.09 
  -2 -13   1    0.53    0.10 
   2 -13  -1    0.59    0.08 
   2 -13  -1    0.51    0.10 
   2 -13  -1    0.80    0.12 
  -2 -13   1    0.77    0.09 
  -2 -13   1    0.37    0.08 
   2 -13  -1    0.58    0.10 
  -2 -13   1    0.54    0.06 
   2 -13  -1    0.54    0.09 
   2  13  -1    0.49    0.10 
  -2  13   1    0.56    0.10 
  -2  13   1    0.51    0.09 
  -2  13   1    0.31    0.10 
   2  13  -1    0.48    0.10 
   2  13  -1    0.45    0.09 
   1 -13  -1  223.67    4.40 
  -1 -13   1  225.35    4.67 
   1 -13  -1  225.57    4.71 
   1 -13  -1  223.51    4.68 
   1 -13  -1  218.91    4.29 
  -1 -13   1  224.19    4.70 
   1 -13  -1  221.91    3.82 
  -1 -13   1  228.45    4.30 
  -1 -13   1  222.19    3.85 
   1  13  -1  215.19    4.30 
   1  13  -1  224.94    4.70 
   1  13  -1  226.72    4.74 
  -1  13   1  221.96    4.41 
  -1  13   1  227.97    4.76 
   1  13  -1  221.85    3.85 
  -1  13   1  219.42    4.30 
   0 -13  -1   18.58    0.40 
   0 -13   1   19.18    0.51 
   0 -13  -1   19.31    0.50 
   0 -13   1   18.80    0.54 
   0 -13   1   18.61    0.42 
   0 -13  -1   18.66    0.41 
   0 -13   1   19.20    0.49 
   0 -13  -1   18.83    0.49 
   0 -13  -1   18.69    0.49 
   0 -13   1   18.47    0.42 
   0  13   1   18.73    0.40 
   0  13   1   18.73    0.52 
   0  13  -1   18.58    0.42 
   0  13  -1   18.44    0.53 
   0  13  -1   19.15    0.56 
   0  13   1   18.09    0.49 
   0  13   1   18.85    0.55 
   0  13  -1   18.25    0.49 
   0  13   1   18.66    0.41 
  -1 -13  -1  316.47    6.47 
   1 -13   1  310.86    6.56 
  -1 -13  -1  321.02    5.95 
   1 -13   1  319.94    6.53 
   1 -13   1  304.86    5.94 
   1 -13   1  317.06    5.34 
  -1 -13  -1  309.08    5.35 
   1 -13   1  298.77    6.19 
  -1 -13  -1  315.52    6.50 
  -1 -13  -1  314.57    6.26 
  -1  13  -1  300.74    6.23 
  -1  13  -1  308.07    5.94 
  -1  13  -1  312.27    6.18 
   1  13   1  305.42    5.95 
   1  13   1  311.87    5.36 
   1  13   1  319.74    6.54 
  -1  13  -1  322.09    6.59 
   1  13   1  313.73    6.50 
   2 -13   1    1.49    0.19 
   2 -13   1    1.43    0.13 
  -2 -13  -1    1.43    0.12 
   2 -13   1    1.21    0.14 
   2 -13   1    1.30    0.15 
   2 -13   1    1.38    0.12 
  -2 -13  -1    1.41    0.11 
  -2 -13  -1    1.28    0.15 
   2  13   1    1.38    0.14 
   2  13   1    1.33    0.16 
  -2  13  -1    1.23    0.15 
   2  13   1    1.30    0.13 
  -2  13  -1    1.27    0.17 
  -2  13  -1    1.37    0.13 
   2  13   1    1.23    0.14 
   3 -13   1  148.68    3.34 
   3 -13   1  152.53    3.08 
   3 -13   1  154.77    3.02 
  -3 -13  -1  152.41    2.68 
   3 -13   1  149.57    3.11 
   3 -13   1  152.23    3.31 
  -3 -13  -1  154.89    3.09 
   3  13   1  150.17    3.03 
  -3  13  -1  157.70    3.36 
   3  13   1  151.70    3.24 
  -3  13  -1  153.01    3.12 
  -3  13  -1  151.41    3.00 
   3  13   1  150.48    2.70 
  -4 -13  -1    0.42    0.10 
   4 -13   1    0.38    0.10 
   4 -13   1    0.34    0.09 
   4 -13   1    0.25    0.13 
   4 -13   1    0.32    0.12 
  -4  13  -1    0.26    0.13 
   4  13   1    0.34    0.07 
   4  13   1    0.33    0.10 
   4  13   1    0.40    0.09 
   4  13   1    0.31    0.11 
  -4  13  -1    0.28    0.11 
   4  13   1    0.34    0.12 
  -4  13  -1    0.35    0.12 
   5 -13   1   46.70    1.12 
  -5 -13  -1   48.38    0.98 
  -5 -13  -1   47.40    1.03 
   5 -13   1   49.56    1.11 
   5 -13   1   45.93    1.27 
   5 -13   1   48.55    1.18 
  -5  13  -1   47.47    1.11 
   5  13   1   49.58    1.05 
  -5  13  -1   51.54    1.27 
   5  13   1   48.64    1.08 
   5  13   1   48.23    1.03 
   5  13   1   47.26    1.16 
   5  13   1   46.49    1.15 
  -5  13  -1   46.69    1.16 
  -6 -13  -1   50.45    1.13 
   6 -13   1   52.66    1.24 
   6 -13   1   52.89    1.22 
   6 -13   1   51.79    1.30 
  -6 -13  -1   50.07    1.07 
   6 -13   1   50.98    1.39 
   6  13   1   52.02    1.17 
   6  13   1   51.55    1.27 
   6  13   1   53.17    1.17 
  -6  13  -1   55.48    1.37 
   6  13   1   50.42    1.27 
  -6  13  -1   50.27    1.27 
   7 -13   1   37.88    0.98 
   7 -13   1   37.33    1.01 
   7 -13   1   37.76    1.07 
   7 -13   1   36.67    1.14 
  -7 -13  -1   37.37    0.91 
   7  13   1   37.51    0.95 
   7  13   1   37.14    1.03 
  -7  13  -1   36.31    1.03 
   7  13   1   36.57    1.04 
   7  13   1   38.70    0.94 
   7  13   1   37.21    0.92 
   8 -13   1    2.86    0.37 
  -8 -13  -1    2.39    0.30 
   8 -13   1    3.05    0.38 
   8  13   1    2.37    0.27 
   8  13   1    2.94    0.36 
   8  13   1    2.58    0.33 
   8  13   1    2.32    0.33 
  -8  13  -1    2.27    0.34 
   8  13   1    2.60    0.30 
   9 -13   1    9.85    0.55 
   9 -13   1    8.49    0.67 
   9 -13   1    9.12    0.62 
   9  13   1    9.30    0.66 
   9  13   1    9.85    0.60 
   9  13   1    9.29    0.64 
   9  13   1    9.47    0.65 
  -9  13  -1    7.93    0.65 
   9 -14  -1   76.99    2.07 
   9 -14  -1   75.64    1.81 
   9 -14  -1   76.68    1.64 
   9 -14  -1   78.02    1.95 
   9  14  -1   72.50    1.89 
   9  14  -1   72.36    1.96 
   9  14  -1   76.96    1.75 
   8 -14  -1    0.02    0.22 
  -8 -14   1    0.16    0.18 
   8 -14  -1   -0.02    0.22 
   8 -14  -1   -0.05    0.20 
   8 -14  -1   -0.17    0.19 
   8  14  -1   -0.12    0.24 
   8  14  -1    0.64    0.25 
   8  14  -1    0.03    0.22 
   8  14  -1    0.30    0.25 
   7 -14  -1   74.26    1.80 
   7 -14  -1   74.98    1.73 
   7 -14  -1   78.07    1.70 
   7 -14  -1   74.07    1.94 
  -7 -14   1   74.32    1.62 
  -7 -14   1   73.82    1.51 
   7  14  -1   73.52    1.78 
   7  14  -1   75.57    1.85 
  -7  14   1   80.52    1.91 
   7  14  -1   76.92    1.66 
   7  14  -1   76.13    1.61 
  -7  14   1   73.39    1.78 
   6 -14  -1    0.54    0.19 
   6 -14  -1    0.58    0.17 
   6 -14  -1    0.54    0.13 
  -6 -14   1    0.63    0.12 
   6 -14  -1    0.58    0.15 
  -6  14   1    0.62    0.18 
   6  14  -1    0.51    0.18 
   6  14  -1    0.63    0.18 
   6  14  -1    0.74    0.20 
   5 -14  -1   94.56    2.09 
   5 -14  -1   97.19    2.00 
  -5 -14   1   94.38    1.93 
   5 -14  -1   93.08    2.02 
   5 -14  -1   94.14    2.26 
  -5 -14   1   96.78    1.79 
  -5  14   1  100.75    2.26 
  -5  14   1   94.58    2.08 
  -5  14   1   90.77    2.02 
   5  14  -1   96.41    1.84 
   5  14  -1   95.61    2.17 
   4 -14  -1    9.28    0.37 
  -4 -14   1    9.94    0.27 
  -4 -14   1    9.60    0.32 
   4 -14  -1    9.73    0.38 
   4 -14  -1    9.48    0.29 
  -4 -14   1   10.19    0.28 
  -4 -14   1    9.68    0.25 
   4 -14  -1    9.49    0.43 
  -4  14   1    9.66    0.37 
   4  14  -1    9.64    0.35 
   4  14  -1    9.71    0.38 
  -4  14   1    9.77    0.37 
   4  14  -1    9.39    0.39 
  -4  14   1   10.69    0.46 
  -3 -14   1   96.00    2.00 
   3 -14  -1   92.10    2.09 
   3 -14  -1   92.60    2.12 
   3 -14  -1   93.78    1.87 
  -3 -14   1   94.73    1.98 
   3 -14  -1   91.26    1.95 
   3 -14  -1   91.83    1.92 
  -3  14   1   92.34    1.96 
  -3  14   1   90.34    1.91 
   3  14  -1   91.18    2.06 
   3  14  -1   89.28    1.93 
  -3  14   1   95.47    2.15 
   3  14  -1   90.99    1.72 
  -2 -14   1    0.12    0.08 
   2 -14  -1    0.33    0.11 
   2 -14  -1    0.50    0.07 
  -2 -14   1    0.39    0.07 
   2 -14  -1    0.17    0.07 
  -2 -14   1    0.39    0.09 
  -2 -14   1    0.17    0.07 
   2 -14  -1    0.32    0.09 
   2 -14  -1    0.24    0.10 
  -2 -14   1    0.26    0.07 
  -2  14   1    0.32    0.11 
   2  14  -1    0.41    0.11 
  -2  14   1    0.11    0.07 
   2  14  -1    0.18    0.10 
   2  14  -1    0.26    0.09 
  -2  14   1    0.31    0.10 
  -1 -14   1   53.08    1.01 
  -1 -14   1   52.75    1.23 
   1 -14  -1   52.71    0.98 
  -1 -14   1   53.78    1.20 
   1 -14  -1   49.79    1.15 
   1 -14  -1   52.72    1.24 
  -1 -14   1   53.21    1.15 
   1 -14  -1   53.02    1.10 
   1 -14  -1   53.46    1.22 
  -1  14   1   52.17    1.11 
   1  14  -1   51.51    1.01 
  -1  14   1   53.21    1.15 
   1  14  -1   52.78    1.24 
   1  14  -1   50.77    1.15 
   1  14  -1   54.22    1.28 
  -1  14   1   53.04    1.29 
   0 -14  -1   68.79    1.51 
   0 -14  -1   69.04    1.50 
   0 -14   1   66.06    1.37 
   0 -14   1   67.84    1.25 
   0 -14  -1   67.80    1.36 
   0 -14  -1   69.44    1.43 
   0 -14  -1   67.13    1.23 
   0 -14   1   68.13    1.53 
   0 -14   1   66.88    1.42 
   0 -14   1   68.74    1.56 
   0  14   1   68.40    1.58 
   0  14  -1   67.95    1.55 
   0  14  -1   67.53    1.39 
   0  14  -1   66.33    1.42 
   0  14  -1   66.90    1.26 
   0  14   1   65.14    1.42 
   0  14   1   67.96    1.53 
   0  14   1   68.00    1.36 
   0  14  -1   68.82    1.59 
   0  14   1   66.98    1.23 
  -1 -14  -1   12.70    0.35 
  -1 -14  -1   12.47    0.33 
   1 -14   1   12.10    0.33 
   1 -14   1   12.42    0.32 
   1 -14   1   12.38    0.40 
  -1 -14  -1   12.57    0.30 
  -1 -14  -1   12.66    0.39 
  -1 -14  -1   12.28    0.36 
   1 -14   1   12.31    0.38 
   1 -14   1   11.89    0.43 
  -1  14  -1   12.01    0.29 
  -1  14  -1   12.09    0.34 
   1  14   1   11.73    0.41 
  -1  14  -1   12.19    0.38 
   1  14   1   11.97    0.38 
   1  14   1   11.88    0.31 
  -1  14  -1   12.18    0.44 
   1  14   1   11.89    0.39 
   2 -14   1   12.04    0.43 
   2 -14   1   12.10    0.45 
   2 -14   1   12.97    0.34 
  -2 -14  -1   12.07    0.39 
  -2 -14  -1   12.67    0.32 
   2 -14   1   11.73    0.36 
  -2 -14  -1   12.27    0.34 
   2  14   1   12.22    0.33 
   2  14   1   12.39    0.41 
   2  14   1   11.92    0.40 
   2  14   1   12.19    0.38 
  -2  14  -1   11.93    0.39 
  -2  14  -1   12.54    0.37 
  -2  14  -1   12.50    0.46 
   3 -14   1    2.46    0.21 
   3 -14   1    2.27    0.19 
   3 -14   1    2.18    0.13 
  -3 -14  -1    2.13    0.15 
   3 -14   1    2.04    0.23 
  -3 -14  -1    2.19    0.14 
  -3  14  -1    2.27    0.19 
   3  14   1    1.98    0.18 
   3  14   1    2.11    0.21 
  -3  14  -1    2.23    0.24 
  -3  14  -1    2.41    0.18 
   3  14   1    1.93    0.18 
  -4 -14  -1    1.10    0.12 
   4 -14   1    0.99    0.16 
   4 -14   1    0.89    0.15 
   4 -14   1    1.18    0.19 
   4 -14   1    1.35    0.17 
   4 -14   1    1.25    0.14 
   4  14   1    1.23    0.16 
  -4  14  -1    1.16    0.16 
  -4  14  -1    1.19    0.16 
   4  14   1    1.18    0.17 
  -4  14  -1    1.21    0.18 
   4  14   1    0.92    0.14 
   5 -14   1   32.36    0.78 
   5 -14   1   31.29    0.83 
   5 -14   1   31.35    0.86 
  -5 -14  -1   30.91    0.70 
   5  14   1   31.84    0.76 
   5  14   1   31.23    0.75 
  -5  14  -1   32.57    0.93 
   5  14   1   31.77    0.71 
  -5  14  -1   30.82    0.81 
   5  14   1   30.47    0.87 
  -5  14  -1   30.48    0.84 
   5  14   1   30.96    0.82 
   6 -14   1    1.23    0.23 
   6 -14   1    0.89    0.19 
  -6 -14  -1    0.63    0.16 
   6 -14   1    0.90    0.17 
   6 -14   1    0.79    0.20 
  -6 -14  -1    0.96    0.13 
  -6  14  -1    1.16    0.23 
  -6  14  -1    1.82    0.24 
   6  14   1    0.80    0.17 
   6  14   1    1.08    0.15 
   6  14   1    1.17    0.21 
   6  14   1    0.69    0.20 
   6  14   1    1.08    0.16 
   7 -14   1   18.11    0.61 
   7 -14   1   19.37    0.67 
   7 -14   1   17.48    0.74 
  -7 -14  -1   18.12    0.53 
   7 -14   1   19.39    0.69 
   7  14   1   18.35    0.64 
   7  14   1   18.80    0.55 
   7  14   1   19.23    0.58 
   7  14   1   17.30    0.66 
  -7  14  -1   17.59    0.66 
   7  14   1   18.11    0.70 
   8 -14   1   -0.04    0.24 
   8 -14   1    0.72    0.27 
  -8 -14  -1   -0.12    0.18 
   8  14   1    0.44    0.23 
   8  14   1    0.51    0.27 
  -8  14  -1   -0.01    0.26 
   8  14   1    0.12    0.21 
   8  14   1    0.32    0.24 
   9 -14   1   49.87    1.42 
   9 -14   1   50.67    1.20 
   9 -14   1   45.98    1.49 
   9  14   1   48.42    1.29 
   9  14   1   46.66    1.39 
   9  14   1   45.39    1.37 
   9 -15  -1    0.15    0.30 
   9 -15  -1   -0.38    0.27 
   9 -15  -1    0.35    0.33 
   9  15  -1   -0.05    0.32 
   9  15  -1    0.58    0.33 
   9  15  -1    0.15    0.28 
   8 -15  -1   36.69    1.13 
  -8 -15   1   36.17    0.92 
   8 -15  -1   37.72    0.94 
   8 -15  -1   37.55    1.01 
   8 -15  -1   35.70    1.19 
   8  15  -1   38.37    1.04 
   8  15  -1   36.48    1.14 
   8  15  -1   36.15    1.12 
  -7 -15   1    3.04    0.29 
   7 -15  -1    2.88    0.35 
   7 -15  -1    2.99    0.30 
   7 -15  -1    2.90    0.36 
  -7 -15   1    3.14    0.25 
  -7  15   1    3.64    0.43 
  -7  15   1    3.01    0.33 
   7  15  -1    2.50    0.29 
   7  15  -1    3.05    0.40 
  -6 -15   1   33.56    0.76 
   6 -15  -1   33.35    1.03 
   6 -15  -1   31.25    0.89 
   6 -15  -1   33.11    0.93 
   6 -15  -1   34.04    0.83 
   6  15  -1   33.66    0.96 
   6  15  -1   34.01    0.85 
   6  15  -1   32.76    0.95 
  -6  15   1   34.07    0.93 
  -5 -15   1    0.68    0.13 
  -5 -15   1    0.47    0.09 
   5 -15  -1    0.39    0.15 
   5 -15  -1    0.81    0.19 
   5 -15  -1    0.67    0.12 
   5  15  -1    0.58    0.17 
   5  15  -1    0.70    0.16 
   5  15  -1    0.50    0.15 
  -5  15   1    0.62    0.15 
  -5  15   1    0.55    0.18 
  -5  15   1    0.37    0.16 
   4 -15  -1   13.55    0.35 
   4 -15  -1   13.40    0.46 
   4 -15  -1   13.41    0.45 
   4 -15  -1   13.00    0.52 
  -4 -15   1   13.28    0.39 
   4  15  -1   13.24    0.43 
  -4  15   1   13.24    0.45 
  -4  15   1   14.00    0.54 
  -4  15   1   12.82    0.45 
   4  15  -1   13.06    0.47 
   3 -15  -1    1.23    0.15 
  -3 -15   1    1.15    0.13 
   3 -15  -1    0.93    0.14 
  -3 -15   1    1.66    0.15 
   3 -15  -1    1.65    0.22 
   3 -15  -1    1.59    0.19 
   3 -15  -1    1.71    0.14 
  -3 -15   1    1.32    0.12 
   3  15  -1    0.75    0.13 
   3  15  -1    1.08    0.15 
  -3  15   1    1.25    0.17 
   3  15  -1    1.31    0.16 
  -3  15   1    1.14    0.18 
  -3  15   1    0.93    0.13 
   2 -15  -1   56.70    1.27 
  -2 -15   1   57.46    1.11 
  -2 -15   1   59.03    1.30 
  -2 -15   1   59.26    1.33 
   2 -15  -1   58.71    1.09 
  -2 -15   1   60.74    1.28 
  -2 -15   1   59.31    1.22 
   2 -15  -1   57.36    1.25 
   2 -15  -1   58.93    1.39 
   2  15  -1   56.45    1.28 
   2  15  -1   57.30    1.36 
  -2  15   1   57.65    1.27 
  -2  15   1   57.83    1.26 
  -2  15   1   58.04    1.43 
   2  15  -1   56.27    1.13 
  -1 -15   1   21.32    0.56 
   1 -15  -1   21.72    0.50 
   1 -15  -1   20.00    0.56 
   1 -15  -1   20.82    0.46 
   1 -15  -1   21.66    0.58 
  -1 -15   1   21.56    0.56 
   1 -15  -1   21.62    0.60 
  -1 -15   1   21.53    0.48 
  -1 -15   1   21.33    0.59 
  -1  15   1   20.66    0.66 
   1  15  -1   21.21    0.60 
  -1  15   1   20.84    0.57 
   1  15  -1   21.44    0.64 
   1  15  -1   21.38    0.49 
  -1  15   1   20.58    0.51 
   1  15  -1   20.50    0.57 
   0 -15  -1    4.05    0.22 
   0 -15   1    3.84    0.18 
   0 -15   1    4.28    0.22 
   0 -15  -1    4.10    0.19 
   0 -15  -1    4.24    0.16 
   0 -15  -1    4.03    0.21 
   0 -15  -1    4.20    0.13 
   0 -15   1    3.77    0.14 
   0 -15   1    3.88    0.22 
   0 -15   1    3.89    0.24 
   0  15  -1    3.78    0.23 
   0  15   1    3.78    0.24 
   0  15  -1    4.14    0.27 
   0  15  -1    3.87    0.22 
   0  15   1    3.90    0.22 
   0  15   1    3.81    0.13 
   0  15  -1    3.91    0.15 
   0  15   1    4.09    0.23 
   1 -15   1   50.81    1.18 
   1 -15   1   50.67    1.10 
  -1 -15  -1   48.44    1.09 
  -1 -15  -1   50.46    1.11 
   1 -15   1   49.89    0.96 
  -1 -15  -1   49.40    0.94 
   1 -15   1   48.40    1.05 
  -1 -15  -1   49.85    1.10 
  -1 -15  -1   49.72    1.10 
   1 -15   1   50.03    1.22 
   1  15   1   49.97    1.11 
   1  15   1   49.85    1.21 
  -1  15  -1   47.67    1.02 
  -1  15  -1   48.85    1.06 
  -1  15  -1   49.93    1.25 
   1  15   1   49.18    1.17 
  -1  15  -1   49.50    1.10 
   1  15   1   48.14    0.94 
   2 -15   1    4.25    0.23 
  -2 -15  -1    4.11    0.19 
  -2 -15  -1    4.15    0.18 
   2 -15   1    3.95    0.24 
   2 -15   1    4.20    0.19 
  -2 -15  -1    3.45    0.22 
   2 -15   1    3.87    0.20 
   2 -15   1    3.84    0.27 
   2  15   1    4.39    0.23 
   2  15   1    4.30    0.24 
  -2  15  -1    4.28    0.21 
   2  15   1    4.21    0.24 
  -2  15  -1    4.16    0.29 
   2  15   1    4.07    0.20 
  -2  15  -1    4.21    0.24 
   3 -15   1   13.40    0.52 
   3 -15   1   15.03    0.37 
   3 -15   1   13.42    0.43 
  -3 -15  -1   13.80    0.37 
  -3 -15  -1   14.01    0.38 
   3 -15   1   14.01    0.45 
   3  15   1   13.80    0.47 
  -3  15  -1   13.89    0.44 
  -3  15  -1   14.19    0.45 
   3  15   1   13.58    0.44 
   3  15   1   13.46    0.39 
  -3  15  -1   14.29    0.54 
   4 -15   1    3.00    0.24 
   4 -15   1    3.20    0.18 
   4 -15   1    3.24    0.26 
   4 -15   1    2.53    0.23 
  -4 -15  -1    3.13    0.20 
   4 -15   1    2.85    0.28 
  -4  15  -1    2.84    0.28 
   4  15   1    2.92    0.23 
  -4  15  -1    2.53    0.23 
  -4  15  -1    2.71    0.23 
   4  15   1    2.97    0.24 
   4  15   1    2.72    0.26 
  -5 -15  -1   13.16    0.41 
   5 -15   1   13.36    0.51 
   5 -15   1   13.81    0.49 
   5 -15   1   14.05    0.43 
   5 -15   1   14.11    0.58 
  -5  15  -1   14.92    0.57 
  -5  15  -1   13.48    0.51 
   5  15   1   14.03    0.48 
  -5  15  -1   14.54    0.53 
   5  15   1   13.76    0.36 
   5  15   1   13.38    0.46 
   5  15   1   12.97    0.52 
   6 -15   1    6.36    0.33 
   6 -15   1    6.81    0.44 
   6 -15   1    6.04    0.39 
   6 -15   1    6.97    0.39 
   6  15   1    5.57    0.40 
   6  15   1    6.66    0.29 
   6  15   1    6.61    0.28 
   6  15   1    6.61    0.39 
  -6  15  -1    6.26    0.39 
   6  15   1    6.46    0.38 
   7 -15   1   16.47    0.57 
   7 -15   1   15.92    0.70 
   7 -15   1   16.10    0.65 
   7  15   1   14.41    0.61 
   7  15   1   15.04    0.49 
  -7  15  -1   15.73    0.66 
   7  15   1   15.29    0.65 
   7  15   1   16.26    0.61 
   7  15   1   15.97    0.52 
   8 -15   1   40.77    1.30 
   8 -15   1   41.73    1.22 
   8  15   1   41.77    1.11 
   8  15   1   43.04    1.07 
   8  15   1   38.87    1.19 
   8  15   1   39.64    1.19 
  -8  15  -1   41.82    1.23 
   9 -15   1    0.89    0.30 
   9 -15   1    0.41    0.35 
   9 -15   1    0.60    0.33 
   9  15   1    0.65    0.36 
   9  15   1    0.86    0.35 
   9  15   1    1.21    0.38 
   9 -16  -1   16.87    0.70 
   9 -16  -1   17.40    0.84 
   9  16  -1   16.98    0.82 
   9  16  -1   15.74    0.87 
   8 -16  -1    4.21    0.41 
   8 -16  -1    3.17    0.39 
   8 -16  -1    3.86    0.39 
   8 -16  -1    2.73    0.38 
   8  16  -1    3.16    0.39 
   8  16  -1    3.21    0.36 
   8  16  -1    3.28    0.40 
   7 -16  -1   17.22    0.67 
  -7 -16   1   16.50    0.48 
   7 -16  -1   15.62    0.73 
   7 -16  -1   17.50    0.56 
   7  16  -1   15.90    0.62 
   7  16  -1   16.50    0.68 
  -7  16   1   17.18    0.79 
   7  16  -1   17.18    0.69 
   6 -16  -1    8.02    0.42 
   6 -16  -1    8.93    0.35 
   6 -16  -1    8.31    0.49 
   6 -16  -1    8.23    0.44 
  -6 -16   1    8.56    0.28 
   6  16  -1    8.29    0.46 
   6  16  -1    8.72    0.48 
  -6  16   1    8.77    0.51 
  -6  16   1    8.61    0.44 
   6  16  -1    8.10    0.42 
   5 -16  -1   28.55    0.67 
   5 -16  -1   26.78    0.87 
  -5 -16   1   28.11    0.67 
   5 -16  -1   27.69    0.79 
   5  16  -1   27.97    0.81 
  -5  16   1   27.79    0.76 
   5  16  -1   28.30    0.82 
  -5  16   1   26.55    0.78 
   4 -16  -1   51.22    1.07 
   4 -16  -1   49.99    1.18 
  -4 -16   1   51.11    1.03 
   4 -16  -1   50.40    1.27 
   4 -16  -1   50.54    1.31 
   4 -16  -1   47.13    1.16 
   4  16  -1   49.28    1.20 
  -4  16   1   50.44    1.19 
   4  16  -1   50.43    1.06 
   4  16  -1   50.05    1.24 
  -4  16   1   51.30    1.17 
   3 -16  -1   36.37    0.96 
  -3 -16   1   37.87    0.78 
   3 -16  -1   35.57    0.87 
  -3 -16   1   36.48    0.84 
  -3 -16   1   37.25    0.78 
   3 -16  -1   35.58    0.89 
   3 -16  -1   35.43    0.99 
  -3 -16   1   37.37    0.86 
   3 -16  -1   37.49    0.75 
   3  16  -1   35.76    0.91 
  -3  16   1   36.40    0.89 
   3  16  -1   36.08    0.94 
  -3  16   1   37.53    1.03 
  -3  16   1   35.62    0.88 
   3  16  -1   36.88    0.80 
  -2 -16   1   33.40    0.80 
   2 -16  -1   33.32    0.88 
   2 -16  -1   32.97    0.77 
   2 -16  -1   32.86    0.67 
  -2 -16   1   33.67    0.74 
  -2 -16   1   33.91    0.82 
   2 -16  -1   32.96    0.86 
  -2 -16   1   34.06    0.82 
   2  16  -1   32.00    0.82 
  -2  16   1   33.54    0.93 
   2  16  -1   32.69    0.86 
  -2  16   1   32.18    0.81 
  -2  16   1   30.99    0.77 
   2  16  -1   32.51    0.71 
   1 -16  -1   32.44    0.80 
  -1 -16   1   33.09    0.84 
  -1 -16   1   33.04    0.69 
   1 -16  -1   33.91    0.85 
  -1 -16   1   34.08    0.81 
   1 -16  -1   32.91    0.73 
  -1 -16   1   33.57    0.80 
   1 -16  -1   33.53    0.83 
   1 -16  -1   31.95    0.66 
   1  16  -1   32.74    0.70 
   1  16  -1   30.19    0.92 
   1  16  -1   32.52    0.86 
   1  16  -1   32.60    0.80 
  -1  16   1   32.71    0.74 
  -1  16   1   31.23    0.80 
  -1  16   1   34.23    0.92 
   0 -16   1  154.65    3.10 
   0 -16  -1  159.51    3.35 
   0 -16  -1  159.68    3.33 
   0 -16   1  160.37    3.11 
   0 -16   1  156.75    2.76 
   0 -16   1  156.54    3.40 
   0 -16  -1  157.54    2.73 
   0 -16   1  159.96    3.37 
   0 -16  -1  160.13    3.11 
   0 -16  -1  157.09    3.25 
   0  16  -1  153.88    3.10 
   0  16   1  152.80    3.10 
   0  16   1  155.44    3.38 
   0  16  -1  157.00    3.40 
   0  16  -1  153.98    3.14 
   0  16   1  156.54    3.43 
   0  16  -1  156.77    3.45 
   0  16   1  154.95    3.08 
   1 -16   1    2.28    0.15 
  -1 -16  -1    2.61    0.15 
  -1 -16  -1    2.38    0.18 
   1 -16   1    1.94    0.19 
  -1 -16  -1    2.66    0.17 
   1 -16   1    2.02    0.15 
   1 -16   1    2.55    0.19 
  -1 -16  -1    2.43    0.15 
   1 -16   1    2.49    0.23 
  -1 -16  -1    2.45    0.19 
  -1  16  -1    2.54    0.23 
   1  16   1    2.51    0.22 
  -1  16  -1    2.23    0.20 
   1  16   1    2.40    0.20 
   1  16   1    2.35    0.20 
  -1  16  -1    2.44    0.11 
   1  16   1    2.36    0.15 
   2 -16   1  153.90    3.43 
   2 -16   1  156.80    2.76 
  -2 -16  -1  158.94    3.19 
   2 -16   1  153.12    3.39 
  -2 -16  -1  162.81    3.11 
   2 -16   1  151.34    3.15 
  -2 -16  -1  155.88    2.74 
   2 -16   1  155.29    3.10 
  -2  16  -1  155.36    3.17 
   2  16   1  153.07    3.11 
  -2  16  -1  159.86    3.47 
   2  16   1  153.99    2.75 
  -2  16  -1  155.89    3.10 
   2  16   1  157.59    3.39 
   2  16   1  155.27    3.35 
   3 -16   1    4.06    0.26 
   3 -16   1    4.07    0.27 
  -3 -16  -1    3.48    0.19 
   3 -16   1    3.35    0.23 
   3 -16   1    3.60    0.21 
   3 -16   1    4.00    0.30 
   3  16   1    3.74    0.27 
   3  16   1    3.56    0.24 
  -3  16  -1    3.67    0.31 
  -3  16  -1    3.27    0.23 
  -3  16  -1    3.44    0.25 
   3  16   1    3.53    0.23 
   4 -16   1   74.23    1.63 
   4 -16   1   74.09    1.67 
   4 -16   1   74.97    1.59 
   4 -16   1   74.03    1.83 
  -4 -16  -1   75.27    1.42 
   4  16   1   73.82    1.71 
   4  16   1   74.73    1.47 
   4  16   1   73.82    1.66 
  -4  16  -1   77.88    1.84 
  -4  16  -1   74.14    1.62 
  -4  16  -1   75.52    1.68 
   5 -16   1    1.13    0.16 
  -5 -16  -1    0.96    0.15 
   5 -16   1    0.77    0.17 
   5 -16   1    0.70    0.17 
   5 -16   1    0.94    0.21 
  -5  16  -1    1.07    0.22 
  -5  16  -1    1.20    0.19 
   5  16   1    0.88    0.18 
   5  16   1    0.96    0.19 
  -5  16  -1    0.94    0.16 
   5  16   1    0.85    0.17 
   6 -16   1   35.12    0.95 
   6 -16   1   35.22    0.98 
   6 -16   1   34.56    1.08 
   6 -16   1   34.77    0.87 
   6  16   1   34.89    0.88 
   6  16   1   34.41    0.96 
   6  16   1   34.86    0.99 
  -6  16  -1   34.44    0.97 
   7 -16   1   21.58    0.85 
   7 -16   1   22.59    0.79 
   7 -16   1   22.88    0.69 
   7  16   1   22.25    0.79 
   7  16   1   21.62    0.72 
   7  16   1   20.93    0.74 
   7  16   1   20.57    0.59 
   7  16   1   22.26    0.62 
  -7  16  -1   21.27    0.81 
   8 -16   1   33.43    1.07 
   8 -16   1   32.81    1.15 
   8  16   1   33.27    1.06 
   8  16   1   32.69    0.99 
   8  16   1   32.70    1.07 
   8  16   1   34.62    0.91 
   8 -17  -1   17.21    0.82 
   8 -17  -1   15.98    0.74 
   8 -17  -1   17.48    0.63 
   8 -17  -1   17.16    0.70 
   8  17  -1   16.20    0.77 
   8  17  -1   17.09    0.73 
   8  17  -1   16.55    0.78 
  -7 -17   1    0.74    0.15 
   7 -17  -1    1.08    0.22 
   7 -17  -1    0.58    0.25 
   7 -17  -1    1.16    0.27 
   7  17  -1    1.07    0.28 
   7  17  -1    1.02    0.26 
   7  17  -1    0.71    0.26 
   6 -17  -1    4.44    0.41 
  -6 -17   1    3.96    0.19 
   6 -17  -1    3.59    0.35 
  -6 -17   1    3.87    0.29 
   6 -17  -1    3.78    0.27 
   6 -17  -1    3.88    0.35 
  -6  17   1    4.01    0.36 
  -6  17   1    4.09    0.43 
   6  17  -1    4.76    0.40 
   6  17  -1    3.80    0.37 
   6  17  -1    4.27    0.38 
  -5 -17   1   33.92    0.77 
   5 -17  -1   33.40    1.01 
   5 -17  -1   32.52    0.90 
   5 -17  -1   33.84    0.77 
   5  17  -1   32.52    0.93 
   5  17  -1   33.36    0.94 
  -5  17   1   33.57    0.88 
   5  17  -1   32.94    0.83 
  -5  17   1   32.99    0.90 
   4 -17  -1   11.52    0.50 
  -4 -17   1   11.82    0.38 
   4 -17  -1   11.33    0.43 
   4 -17  -1   11.37    0.47 
   4 -17  -1   11.54    0.30 
  -4  17   1   11.39    0.43 
   4  17  -1   11.77    0.47 
   4  17  -1   11.40    0.41 
   3 -17  -1   88.93    1.91 
  -3 -17   1   93.62    1.83 
   3 -17  -1   90.49    1.65 
   3 -17  -1   88.82    2.09 
   3 -17  -1   91.03    2.07 
   3 -17  -1   87.79    1.90 
  -3 -17   1   88.82    1.67 
  -3 -17   1   93.72    1.95 
  -3 -17   1   91.43    1.93 
   3  17  -1   85.73    1.92 
   3  17  -1   88.25    2.05 
  -3  17   1   91.32    1.90 
  -3  17   1   90.52    2.14 
   3  17  -1   88.59    1.70 
  -3  17   1   87.92    1.92 
   2 -17  -1    1.95    0.23 
  -2 -17   1    1.62    0.19 
  -2 -17   1    2.15    0.16 
   2 -17  -1    1.96    0.22 
  -2 -17   1    2.03    0.19 
   2 -17  -1    1.84    0.17 
   2 -17  -1    1.57    0.14 
   2 -17  -1    1.43    0.19 
  -2 -17   1    2.16    0.17 
  -2 -17   1    1.98    0.14 
  -2  17   1    1.81    0.19 
  -2  17   1    1.78    0.17 
   2  17  -1    1.73    0.18 
   2  17  -1    2.28    0.22 
  -2  17   1    1.84    0.25 
   2  17  -1    2.00    0.22 
  -1 -17   1  137.41    2.88 
   1 -17  -1  132.24    2.35 
  -1 -17   1  138.59    2.76 
  -1 -17   1  130.88    2.40 
  -1 -17   1  133.94    2.90 
   1 -17  -1  136.45    2.92 
   1 -17  -1  135.12    2.89 
   1 -17  -1  133.24    2.69 
  -1 -17   1  134.33    2.69 
   1 -17  -1  134.08    2.68 
  -1  17   1  135.07    3.00 
   1  17  -1  133.07    2.93 
   1  17  -1  129.92    2.69 
   1  17  -1  128.22    2.39 
  -1  17   1  128.84    2.69 
  -1  17   1  134.96    2.69 
   1  17  -1  133.61    2.98 
   0 -17  -1    1.00    0.15 
   0 -17  -1    1.39    0.17 
   0 -17   1    1.73    0.19 
   0 -17   1    1.45    0.15 
   0 -17   1    1.53    0.20 
   0 -17   1    1.56    0.17 
   0 -17  -1    1.56    0.16 
   0 -17   1    1.47    0.11 
   0 -17  -1    1.84    0.19 
   0 -17  -1    1.49    0.13 
   0  17  -1    1.26    0.16 
   0  17   1    1.38    0.19 
   0  17   1    1.43    0.19 
   0  17   1    1.10    0.15 
   0  17  -1    1.35    0.19 
   0  17  -1    1.42    0.11 
   0  17  -1    1.70    0.23 
  -1 -17  -1  260.84    4.48 
   1 -17   1  253.71    5.14 
   1 -17   1  260.24    4.51 
   1 -17   1  263.67    5.04 
   1 -17   1  263.48    5.51 
  -1 -17  -1  264.91    5.42 
  -1 -17  -1  265.51    5.04 
   1 -17   1  257.60    5.54 
  -1 -17  -1  261.66    5.28 
  -1 -17  -1  260.36    5.41 
   1  17   1  258.88    4.49 
  -1  17  -1  256.46    5.04 
   1  17   1  257.59    5.50 
   1  17   1  260.02    5.58 
  -1  17  -1  266.96    5.60 
   1  17   1  255.23    5.05 
   2 -17   1    0.94    0.15 
   2 -17   1    1.21    0.16 
   2 -17   1    0.75    0.13 
  -2 -17  -1    0.70    0.13 
  -2 -17  -1    1.09    0.12 
  -2 -17  -1    1.33    0.15 
   2 -17   1    1.09    0.18 
   2  17   1    1.12    0.15 
   2  17   1    1.14    0.16 
  -2  17  -1    1.11    0.14 
  -2  17  -1    1.08    0.18 
  -2  17  -1    1.17    0.16 
   2  17   1    0.98    0.17 
   2  17   1    1.16    0.14 
   3 -17   1  197.34    3.40 
   3 -17   1  189.81    3.91 
  -3 -17  -1  192.85    3.37 
   3 -17   1  192.79    3.81 
  -3 -17  -1  193.94    3.90 
   3 -17   1  189.33    4.21 
   3 -17   1  190.84    4.17 
  -3  17  -1  195.21    3.80 
   3  17   1  191.62    3.40 
   3  17   1  190.51    3.83 
   3  17   1  192.07    4.11 
   4 -17   1    8.99    0.39 
  -4 -17  -1    9.02    0.32 
   4 -17   1    9.38    0.30 
   4 -17   1    9.10    0.46 
   4 -17   1    9.57    0.40 
   4  17   1    9.07    0.43 
  -4  17  -1    8.98    0.39 
  -4  17  -1    9.25    0.47 
   4  17   1    8.82    0.38 
   4  17   1    9.02    0.36 
  -5 -17  -1  109.07    2.06 
   5 -17   1  114.53    2.35 
   5 -17   1  110.46    2.64 
   5 -17   1  109.50    2.36 
   5  17   1  110.84    2.40 
  -5  17  -1  112.49    2.44 
   5  17   1  113.07    2.15 
  -5  17  -1  112.70    2.34 
   5  17   1  111.70    2.50 
   6 -17   1    1.78    0.26 
   6 -17   1    1.26    0.22 
   6 -17   1    1.81    0.30 
   6 -17   1    1.75    0.24 
   6  17   1    1.72    0.25 
   6  17   1    2.06    0.27 
  -6  17  -1    1.42    0.23 
  -6  17  -1    1.96    0.28 
   6  17   1    1.25    0.24 
   7 -17   1   49.00    1.34 
   7 -17   1   48.95    1.44 
   7 -17   1   54.12    1.23 
   7  17   1   48.23    1.32 
   7  17   1   49.39    1.20 
   7  17   1   48.09    1.32 
   8 -17   1    4.74    0.52 
   8 -17   1    3.86    0.56 
   8  17   1    4.50    0.54 
   8  17   1    4.54    0.53 
   8  17   1    4.93    0.54 
   8 -18  -1    0.26    0.25 
   8 -18  -1    0.36    0.28 
   8 -18  -1    0.54    0.28 
   8  18  -1    0.26    0.32 
   8  18  -1   -0.21    0.27 
   8  18  -1    0.49    0.33 
   7 -18  -1   36.15    0.92 
   7 -18  -1   35.47    1.07 
   7 -18  -1   35.45    1.16 
   7  18  -1   36.77    1.00 
   7  18  -1   34.56    1.08 
   7  18  -1   34.87    1.10 
   6 -18  -1    4.22    0.26 
   6 -18  -1    4.44    0.42 
  -6 -18   1    4.43    0.32 
   6 -18  -1    3.77    0.37 
   6  18  -1    3.73    0.40 
  -6  18   1    3.37    0.48 
   6  18  -1    3.68    0.40 
  -6  18   1    3.97    0.38 
   6  18  -1    4.54    0.40 
  -6  18   1    3.73    0.36 
   5 -18  -1   71.78    1.49 
   5 -18  -1   71.29    1.80 
   5 -18  -1   68.43    1.74 
   5  18  -1   69.89    1.71 
   5  18  -1   73.25    1.48 
  -5  18   1   72.41    1.60 
  -5  18   1   69.31    1.64 
   5  18  -1   68.53    1.65 
   4 -18  -1    4.67    0.33 
   4 -18  -1    4.70    0.25 
   4 -18  -1    5.40    0.37 
   4 -18  -1    5.04    0.30 
  -4 -18   1    5.18    0.28 
  -4  18   1    5.11    0.31 
   4  18  -1    4.70    0.34 
  -4  18   1    5.04    0.32 
   4  18  -1    5.01    0.35 
   4  18  -1    4.34    0.30 
  -3 -18   1   47.79    1.00 
   3 -18  -1   49.08    1.27 
   3 -18  -1   48.08    1.12 
  -3 -18   1   49.02    1.10 
  -3 -18   1   50.64    1.12 
   3 -18  -1   49.15    1.24 
   3 -18  -1   48.90    0.97 
  -3 -18   1   51.20    1.04 
   3  18  -1   47.48    1.03 
  -3  18   1   49.91    1.32 
   3  18  -1   48.17    1.23 
  -3  18   1   48.45    1.16 
  -2 -18   1   67.74    1.31 
  -2 -18   1   69.47    1.51 
  -2 -18   1   70.50    1.45 
   2 -18  -1   66.37    1.50 
   2 -18  -1   68.72    1.60 
  -2 -18   1   70.53    1.56 
   2 -18  -1   69.48    1.28 
  -2 -18   1   69.40    1.53 
   2 -18  -1   67.82    1.63 
   2 -18  -1   68.62    1.46 
   2  18  -1   67.89    1.62 
  -2  18   1   68.37    1.48 
  -2  18   1   68.13    1.50 
   2  18  -1   67.19    1.33 
   2  18  -1   65.42    1.51 
  -2  18   1   68.43    1.70 
   1 -18  -1    0.87    0.15 
  -1 -18   1    0.84    0.13 
  -1 -18   1    1.01    0.15 
  -1 -18   1    1.03    0.15 
  -1 -18   1    1.06    0.12 
   1 -18  -1    0.97    0.16 
  -1 -18   1    1.32    0.16 
   1 -18  -1    1.20    0.12 
   1 -18  -1    1.12    0.13 
  -1  18   1    0.83    0.15 
   1  18  -1    0.90    0.13 
  -1  18   1    1.02    0.19 
   1  18  -1    1.36    0.20 
   1  18  -1    0.78    0.15 
   1  18  -1    1.05    0.16 
  -1  18   1    0.97    0.13 
   0 -18   1   15.32    0.52 
   0 -18   1   15.84    0.49 
   0 -18  -1   15.77    0.46 
   0 -18   1   15.79    0.37 
   0 -18  -1   15.57    0.48 
   0 -18  -1   15.40    0.38 
   0 -18  -1   15.97    0.48 
   0 -18  -1   15.89    0.50 
   0  18  -1   15.41    0.53 
   0  18  -1   15.30    0.50 
   0  18  -1   15.01    0.37 
   0  18   1   15.59    0.52 
   0  18   1   15.33    0.50 
   0  18  -1   15.82    0.57 
   0  18   1   15.71    0.57 
   1 -18   1    6.55    0.35 
   1 -18   1    6.59    0.31 
  -1 -18  -1    6.53    0.23 
   1 -18   1    6.24    0.23 
  -1 -18  -1    6.24    0.31 
   1 -18   1    6.24    0.26 
  -1 -18  -1    6.82    0.26 
  -1 -18  -1    6.52    0.24 
  -1 -18  -1    6.67    0.28 
   1 -18   1    6.77    0.32 
  -1  18  -1    6.18    0.36 
   1  18   1    6.29    0.20 
   1  18   1    6.43    0.35 
  -1  18  -1    6.60    0.32 
   1  18   1    6.14    0.32 
   1  18   1    6.21    0.24 
   1  18   1    6.50    0.32 
   2 -18   1   49.26    1.28 
   2 -18   1   48.12    1.15 
   2 -18   1   51.17    1.01 
   2 -18   1   49.11    1.11 
   2 -18   1   49.44    1.24 
  -2 -18  -1   49.11    0.98 
  -2 -18  -1   51.37    1.12 
  -2 -18  -1   49.59    1.15 
   2  18   1   48.74    1.17 
   2  18   1   51.32    1.27 
   2  18   1   49.69    1.21 
  -2  18  -1   51.40    1.13 
   2  18   1   49.81    1.00 
  -2  18  -1   49.95    1.32 
  -2  18  -1   50.22    1.15 
   3 -18   1    0.21    0.12 
  -3 -18  -1    0.14    0.10 
   3 -18   1    0.41    0.11 
  -3 -18  -1    0.42    0.11 
   3 -18   1    0.30    0.15 
   3 -18   1    0.28    0.14 
   3 -18   1    0.28    0.12 
  -3  18  -1    0.26    0.13 
   3  18   1    0.58    0.14 
  -3  18  -1    0.37    0.13 
   3  18   1    0.46    0.13 
   4 -18   1   17.87    0.57 
   4 -18   1   17.63    0.59 
   4 -18   1   18.21    0.68 
  -4 -18  -1   18.25    0.48 
   4 -18   1   18.60    0.51 
  -4  18  -1   18.62    0.59 
  -4  18  -1   17.54    0.57 
   4  18   1   17.85    0.61 
   4  18   1   17.39    0.53 
   4  18   1   17.75    0.58 
   5 -18   1   27.26    0.90 
   5 -18   1   27.25    0.68 
   5 -18   1   26.53    0.78 
   5 -18   1   26.95    0.79 
  -5 -18  -1   25.77    0.65 
  -5  18  -1   26.51    0.76 
   5  18   1   26.27    0.82 
   5  18   1   25.66    0.78 
   5  18   1   26.05    0.73 
  -5  18  -1   27.36    0.89 
  -5  18  -1   27.14    0.80 
  -6 -18  -1   21.41    0.59 
   6 -18   1   22.49    0.74 
   6 -18   1   21.35    0.83 
  -6  18  -1   21.77    0.81 
  -6  18  -1   21.61    0.74 
   6  18   1   21.58    0.69 
   6  18   1   21.05    0.76 
   6  18   1   21.32    0.72 
   7 -18   1   13.92    0.71 
   7 -18   1   13.53    0.65 
   7 -18   1   14.18    0.54 
   7  18   1   12.51    0.65 
   7  18   1   13.32    0.62 
   8 -18   1    1.54    0.36 
   8 -18   1    1.10    0.34 
   8  18   1    1.64    0.35 
   8  18   1    1.37    0.36 
   8  18   1    0.63    0.33 
   8 -19  -1   40.16    1.01 
   8 -19  -1   38.55    1.30 
   8 -19  -1   40.22    1.22 
   8  19  -1   38.21    1.13 
   8  19  -1   37.92    1.25 
   8  19  -1   37.36    1.22 
   7 -19  -1    0.94    0.27 
   7 -19  -1    0.67    0.28 
   7  19  -1    1.36    0.31 
   7  19  -1    0.85    0.29 
   7  19  -1    0.32    0.24 
   6 -19  -1  115.83    2.34 
  -6 -19   1  110.64    2.13 
   6 -19  -1  113.14    2.70 
   6 -19  -1  111.22    2.50 
   6  19  -1  112.30    2.22 
  -6  19   1  112.97    2.41 
   6  19  -1  111.78    2.49 
  -6  19   1  107.69    2.48 
   6  19  -1  110.85    2.60 
   5 -19  -1    2.86    0.33 
   5 -19  -1    2.87    0.38 
   5 -19  -1    2.40    0.30 
   5 -19  -1    3.05    0.33 
   5 -19  -1    2.81    0.18 
   5  19  -1    2.97    0.29 
  -5  19   1    2.28    0.31 
   5  19  -1    2.62    0.34 
  -5  19   1    2.56    0.36 
  -5  19   1    2.78    0.31 
   5  19  -1    2.97    0.36 
   4 -19  -1  108.19    2.53 
   4 -19  -1  109.45    2.32 
  -4 -19   1  106.82    2.02 
   4 -19  -1  110.40    2.00 
  -4  19   1  108.99    2.34 
   4  19  -1  106.95    2.47 
  -4  19   1  107.62    2.28 
   4  19  -1  107.13    2.33 
   3 -19  -1    0.90    0.17 
  -3 -19   1    1.09    0.12 
   3 -19  -1    0.84    0.13 
  -3 -19   1    0.86    0.10 
   3 -19  -1    0.80    0.15 
  -3 -19   1    0.86    0.12 
  -3 -19   1    1.00    0.15 
   3 -19  -1    0.73    0.18 
   3  19  -1    0.81    0.18 
   3  19  -1    0.82    0.17 
  -3  19   1    1.00    0.20 
   3  19  -1    0.93    0.18 
  -3  19   1    0.50    0.14 
  -2 -19   1   34.21    0.75 
  -2 -19   1   35.24    0.79 
  -2 -19   1   35.45    0.87 
  -2 -19   1   34.68    0.84 
   2 -19  -1   34.40    0.91 
   2 -19  -1   34.53    0.81 
   2 -19  -1   33.97    0.94 
   2 -19  -1   34.96    0.73 
  -2  19   1   34.97    0.83 
  -2  19   1   35.09    1.02 
   2  19  -1   32.24    0.91 
   2  19  -1   34.11    0.94 
   2  19  -1   33.31    0.77 
  -1 -19   1   18.91    0.48 
   1 -19  -1   19.64    0.57 
  -1 -19   1   19.61    0.52 
   1 -19  -1   19.57    0.46 
  -1 -19   1   19.45    0.59 
  -1 -19   1   18.63    0.55 
   1 -19  -1   18.89    0.59 
  -1 -19   1   19.42    0.57 
   1 -19  -1   19.36    0.47 
  -1  19   1   18.64    0.48 
   1  19  -1   18.90    0.66 
   1  19  -1   19.11    0.49 
  -1  19   1   19.70    0.68 
   1  19  -1   19.25    0.62 
  -1  19   1   18.28    0.58 
   1  19  -1   18.61    0.58 
   0 -19   1   30.33    0.84 
   0 -19  -1   30.42    0.79 
   0 -19  -1   30.95    0.77 
   0 -19   1   29.89    0.67 
   0 -19   1   29.93    0.65 
   0 -19   1   29.96    0.79 
   0 -19  -1   31.02    0.78 
   0 -19  -1   30.24    0.64 
   0 -19   1   30.56    0.80 
   0  19  -1   30.80    0.91 
   0  19  -1   30.05    0.79 
   0  19  -1   29.49    0.66 
   0  19   1   30.79    0.90 
   0  19  -1   29.72    0.85 
   0  19   1   28.73    0.79 
   1 -19   1   15.69    0.56 
   1 -19   1   15.54    0.51 
   1 -19   1   15.67    0.43 
  -1 -19  -1   15.97    0.44 
  -1 -19  -1   16.53    0.46 
  -1 -19  -1   15.96    0.40 
   1 -19   1   16.27    0.53 
   1 -19   1   15.51    0.42 
  -1 -19  -1   15.59    0.47 
   1  19   1   15.46    0.57 
   1  19   1   15.80    0.53 
   1  19   1   16.04    0.42 
   1  19   1   15.55    0.38 
  -1  19  -1   15.78    0.52 
  -1  19  -1   15.67    0.60 
   1  19   1   15.15    0.52 
   2 -19   1    3.21    0.21 
   2 -19   1    3.24    0.21 
   2 -19   1    3.42    0.28 
  -2 -19  -1    3.48    0.22 
   2 -19   1    3.11    0.26 
  -2 -19  -1    2.99    0.19 
   2 -19   1    3.36    0.30 
   2  19   1    3.16    0.29 
  -2  19  -1    3.27    0.22 
   2  19   1    2.85    0.22 
   2  19   1    3.13    0.27 
  -2  19  -1    3.36    0.27 
  -2  19  -1    3.40    0.31 
   3 -19   1   10.41    0.39 
   3 -19   1    9.75    0.42 
   3 -19   1   10.42    0.45 
  -3 -19  -1   10.98    0.34 
  -3 -19  -1   10.57    0.34 
   3 -19   1   11.06    0.36 
  -3  19  -1   10.09    0.42 
   3  19   1   10.25    0.45 
  -3  19  -1   10.17    0.40 
   3  19   1    9.77    0.37 
   3  19   1    9.72    0.42 
   4 -19   1   20.47    0.74 
  -4 -19  -1   20.37    0.53 
   4 -19   1   21.05    0.56 
   4 -19   1   20.33    0.65 
   4 -19   1   21.07    0.63 
   4  19   1   20.40    0.58 
  -4  19  -1   20.98    0.65 
  -4  19  -1   20.49    0.64 
   4  19   1   20.69    0.69 
   4  19   1   20.60    0.66 
   5 -19   1    3.74    0.39 
   5 -19   1    3.83    0.36 
  -5 -19  -1    2.88    0.26 
   5 -19   1    3.56    0.35 
   5 -19   1    3.62    0.24 
   5 -19   1    3.64    0.33 
  -5  19  -1    3.15    0.39 
  -5  19  -1    3.49    0.34 
   5  19   1    3.79    0.35 
  -5  19  -1    3.82    0.33 
   5  19   1    3.69    0.34 
   5  19   1    3.66    0.36 
   6 -19   1   35.65    1.14 
  -6 -19  -1   34.81    0.84 
   6 -19   1   37.13    1.04 
   6  19   1   33.76    1.01 
   6  19   1   35.38    1.05 
  -6  19  -1   35.49    1.03 
   6  19   1   34.93    0.93 
  -6  19  -1   36.26    0.98 
   7 -19   1    0.28    0.22 
   7 -19   1    0.13    0.28 
   7 -19   1    0.03    0.25 
   7  19   1    0.14    0.27 
   7  19   1    0.40    0.28 
   7  19   1    0.17    0.26 
   8 -19   1   26.11    0.96 
   8  19   1   25.00    0.91 
   8  19   1   22.56    0.93 
   8  19   1   24.24    0.98 
   8 -20  -1    0.14    0.28 
   8 -20  -1    0.68    0.34 
   8  20  -1    0.40    0.37 
   8  20  -1   -0.06    0.36 
   7 -20  -1   72.49    1.81 
   7 -20  -1   72.17    1.96 
   7  20  -1   72.61    1.82 
   7  20  -1   73.34    1.64 
   7  20  -1   72.30    1.88 
   6 -20  -1    5.19    0.28 
   6 -20  -1    4.96    0.43 
   6 -20  -1    5.05    0.48 
  -6  20   1    4.00    0.45 
   6  20  -1    5.29    0.47 
  -6  20   1    4.30    0.40 
   6  20  -1    5.26    0.46 
   6  20  -1    5.02    0.45 
   5 -20  -1   66.56    1.56 
   5 -20  -1   66.33    1.72 
   5 -20  -1   64.64    1.67 
   5 -20  -1   67.06    1.33 
  -5 -20   1   63.24    1.33 
   5  20  -1   65.79    1.65 
  -5  20   1   64.83    1.56 
  -5  20   1   66.42    1.53 
   5  20  -1   65.83    1.40 
   5  20  -1   64.97    1.59 
   4 -20  -1    4.29    0.38 
   4 -20  -1    3.69    0.30 
  -4 -20   1    4.27    0.28 
   4 -20  -1    3.94    0.26 
  -4  20   1    3.68    0.32 
   4  20  -1    3.84    0.36 
   4  20  -1    3.84    0.32 
   4  20  -1    3.89    0.35 
  -4  20   1    3.76    0.32 
  -3 -20   1   67.22    1.47 
   3 -20  -1   68.01    1.63 
  -3 -20   1   65.70    1.31 
  -3 -20   1   70.66    1.40 
   3 -20  -1   67.21    1.29 
  -3 -20   1   69.00    1.49 
   3 -20  -1   67.38    1.66 
   3 -20  -1   67.01    1.48 
   3  20  -1   65.23    1.54 
  -3  20   1   67.11    1.52 
   3  20  -1   65.43    1.34 
  -3  20   1   62.59    1.70 
   3  20  -1   65.81    1.63 
  -3  20   1   66.58    1.50 
  -2 -20   1   36.98    0.80 
   2 -20  -1   37.81    0.98 
  -2 -20   1   37.70    0.92 
   2 -20  -1   36.23    0.85 
   2 -20  -1   36.12    0.78 
  -2 -20   1   36.74    0.84 
   2 -20  -1   37.13    1.00 
  -2 -20   1   37.47    0.89 
   2  20  -1   35.28    0.95 
   2  20  -1   36.87    1.00 
   2  20  -1   35.10    0.81 
  -2  20   1   36.48    1.08 
  -2  20   1   34.80    0.93 
  -2  20   1   37.09    0.88 
  -1 -20   1   22.61    0.61 
  -1 -20   1   23.65    0.56 
   1 -20  -1   23.98    0.56 
  -1 -20   1   22.81    0.66 
  -1 -20   1   23.75    0.68 
   1 -20  -1   23.58    0.69 
   1 -20  -1   24.03    0.67 
   1 -20  -1   23.91    0.54 
   1  20  -1   23.63    0.77 
  -1  20   1   22.61    0.56 
  -1  20   1   22.30    0.71 
   1  20  -1   23.43    0.72 
   1  20  -1   23.89    0.58 
  -1  20   1   23.38    0.78 
   0 -20  -1   10.65    0.32 
   0 -20  -1   11.17    0.40 
   0 -20   1   10.61    0.42 
   0 -20  -1   11.31    0.38 
   0 -20  -1   11.34    0.41 
   0 -20   1   10.86    0.44 
   0 -20   1   11.03    0.28 
   0 -20   1   10.56    0.34 
   0 -20   1   11.37    0.42 
   0  20  -1   10.83    0.50 
   0  20  -1   10.43    0.45 
   0  20   1   10.62    0.50 
  -1 -20  -1    8.19    0.33 
  -1 -20  -1    8.53    0.31 
  -1 -20  -1    7.84    0.29 
   1 -20   1    7.90    0.36 
   1 -20   1    7.89    0.37 
   1 -20   1    8.37    0.41 
   1 -20   1    7.32    0.30 
   1 -20   1    7.57    0.27 
  -1  20  -1    8.27    0.45 
   1  20   1    7.46    0.39 
   1  20   1    7.81    0.38 
   1  20   1    8.14    0.30 
   1  20   1    7.89    0.43 
   2 -20   1   37.94    0.90 
   2 -20   1   38.96    0.97 
   2 -20   1   38.65    0.83 
  -2 -20  -1   38.26    0.80 
   2 -20   1   39.09    1.03 
   2 -20   1   38.35    1.07 
  -2 -20  -1   38.70    0.91 
   2  20   1   39.31    1.06 
  -2  20  -1   38.66    0.97 
   2  20   1   38.52    0.83 
   2  20   1   37.63    0.98 
   2  20   1   37.52    1.01 
   2  20   1   37.37    0.87 
   3 -20   1   10.75    0.41 
  -3 -20  -1   11.40    0.36 
   3 -20   1   11.04    0.52 
  -3 -20  -1   11.89    0.36 
   3 -20   1   11.43    0.47 
   3 -20   1   11.23    0.39 
   3  20   1   10.51    0.39 
  -3  20  -1   11.38    0.43 
   3  20   1   10.95    0.46 
   3  20   1   10.96    0.48 
  -3  20  -1   10.77    0.45 
   4 -20   1   30.13    0.73 
   4 -20   1   30.08    0.96 
   4 -20   1   29.13    0.91 
   4 -20   1   29.34    0.82 
  -4 -20  -1   29.93    0.70 
   4 -20   1   30.24    0.85 
   4  20   1   30.29    0.75 
   4  20   1   29.56    0.86 
  -4  20  -1   30.12    0.83 
  -4  20  -1   30.42    0.84 
   4  20   1   29.67    0.88 
   5 -20   1   10.68    0.48 
   5 -20   1    8.41    0.51 
   5 -20   1    9.96    0.56 
  -5  20  -1   10.83    0.50 
  -5  20  -1    9.67    0.47 
   5  20   1    9.83    0.47 
   5  20   1   10.06    0.53 
   5  20   1   10.27    0.49 
   6 -20   1   54.47    1.39 
   6 -20   1   53.62    1.23 
   6 -20   1   52.24    1.52 
  -6 -20  -1   51.52    1.15 
  -6  20  -1   54.54    1.40 
  -6  20  -1   52.82    1.32 
   6  20   1   53.87    1.41 
   6  20   1   52.95    1.24 
   7 -20   1   18.19    0.77 
   7 -20   1   20.39    0.87 
   7  20   1   17.56    0.76 
   7  20   1   17.98    0.80 
   7  20   1   19.78    0.76 
   7 -21  -1    2.24    0.36 
   7 -21  -1    2.59    0.39 
   7  21  -1    2.61    0.39 
   7  21  -1    2.08    0.37 
   7  21  -1    2.70    0.41 
   6 -21  -1    3.07    0.42 
   6 -21  -1    3.77    0.48 
   6  21  -1    3.86    0.38 
   6  21  -1    3.59    0.47 
   6  21  -1    3.83    0.45 
  -6  21   1    3.22    0.38 
  -6  21   1    3.61    0.48 
   5 -21  -1   23.80    0.87 
   5 -21  -1   24.29    0.64 
   5 -21  -1   23.85    0.75 
  -5 -21   1   23.28    0.65 
  -5  21   1   24.30    0.77 
   5  21  -1   23.86    0.82 
   5  21  -1   23.76    0.72 
   5  21  -1   24.79    0.82 
  -5  21   1   24.22    0.78 
   4 -21  -1    0.48    0.17 
   4 -21  -1    0.56    0.18 
   4 -21  -1    0.53    0.15 
   4 -21  -1    0.53    0.19 
   4 -21  -1    0.61    0.21 
   4  21  -1    0.44    0.18 
  -4  21   1    0.68    0.21 
   4  21  -1    0.29    0.19 
  -4  21   1    0.07    0.21 
  -4  21   1    0.37    0.17 
   4  21  -1    0.62    0.21 
   3 -21  -1   32.10    0.82 
   3 -21  -1   32.15    0.72 
  -3 -21   1   32.40    0.78 
   3 -21  -1   32.43    0.93 
  -3 -21   1   31.37    0.74 
   3 -21  -1   32.19    0.96 
  -3 -21   1   33.56    0.73 
  -3 -21   1   31.99    0.77 
   3  21  -1   31.63    0.79 
  -3  21   1   31.51    0.88 
  -3  21   1   32.94    1.03 
   3  21  -1   31.72    0.91 
  -3  21   1   32.35    0.84 
  -2 -21   1    9.54    0.32 
   2 -21  -1    9.37    0.33 
   2 -21  -1    9.63    0.44 
   2 -21  -1    9.12    0.32 
  -2 -21   1    9.15    0.34 
  -2 -21   1    9.07    0.34 
   2 -21  -1    8.80    0.41 
  -2 -21   1    9.75    0.37 
   2  21  -1    8.49    0.35 
  -2  21   1    9.40    0.51 
   2  21  -1    8.55    0.42 
  -2  21   1    9.75    0.35 
  -2  21   1    8.41    0.42 
  -1 -21   1   19.74    0.59 
   1 -21  -1   20.88    0.64 
   1 -21  -1   19.77    0.49 
   1 -21  -1   20.04    0.61 
  -1 -21   1   20.22    0.52 
  -1 -21   1   21.41    0.57 
  -1 -21   1   20.81    0.63 
  -1  21   1   19.47    0.63 
   1  21  -1   19.57    0.63 
   1  21  -1   20.26    0.53 
  -1  21   1   20.19    0.74 
   0 -21  -1    5.10    0.29 
   0 -21   1    5.29    0.30 
   0 -21  -1    4.97    0.30 
   0 -21  -1    4.67    0.26 
   0 -21   1    4.73    0.32 
   0 -21   1    4.60    0.25 
   0 -21   1    4.62    0.31 
   0  21  -1    5.16    0.34 
   0  21   1    4.75    0.33 
   0  21  -1    4.48    0.31 
   0  21  -1    4.43    0.37 
   0  21   1    4.81    0.38 
  -1 -21  -1   91.84    1.99 
   1 -21   1   90.53    1.72 
   1 -21   1   91.83    2.10 
   1 -21   1   91.68    1.88 
  -1 -21  -1   90.25    1.69 
  -1 -21  -1   93.84    2.00 
   1 -21   1   90.26    1.97 
  -1 -21  -1   91.49    1.98 
   1 -21   1   90.83    2.13 
   1  21   1   90.49    2.12 
   1  21   1   94.31    2.19 
   1  21   1   91.24    1.70 
  -1  21  -1   89.73    1.97 
   1  21   1   89.58    1.98 
  -1  21  -1   92.90    2.23 
  -2 -21  -1    2.07    0.22 
   2 -21   1    1.69    0.19 
   2 -21   1    1.57    0.20 
   2 -21   1    1.75    0.22 
  -2 -21  -1    1.97    0.20 
   2 -21   1    1.61    0.22 
   2  21   1    2.18    0.28 
  -2  21  -1    1.17    0.19 
   2  21   1    1.57    0.17 
   2  21   1    2.08    0.28 
   2  21   1    1.37    0.23 
   2  21   1    1.99    0.22 
   3 -21   1   53.64    1.24 
  -3 -21  -1   54.34    1.09 
   3 -21   1   55.53    1.12 
   3 -21   1   53.39    1.43 
  -3 -21  -1   56.01    1.20 
   3 -21   1   52.47    1.29 
   3  21   1   53.11    1.32 
  -3  21  -1   53.24    1.28 
   3  21   1   52.25    1.12 
   3  21   1   53.56    1.35 
  -3  21  -1   54.16    1.27 
  -4 -21  -1    2.20    0.26 
   4 -21   1    2.47    0.31 
   4 -21   1    3.07    0.30 
   4 -21   1    2.68    0.28 
   4 -21   1    3.15    0.34 
   4 -21   1    1.98    0.26 
   4  21   1    3.19    0.33 
  -4  21  -1    2.01    0.24 
   4  21   1    2.11    0.26 
  -4  21  -1    2.64    0.32 
  -4  21  -1    2.86    0.34 
   5 -21   1   72.32    1.71 
   5 -21   1   75.09    1.91 
   5  21   1   69.99    1.84 
   5  21   1   71.90    1.52 
  -5  21  -1   72.52    1.67 
  -5  21  -1   71.20    1.72 
   5  21   1   75.64    1.76 
   6 -21   1    0.51    0.24 
   6 -21   1    0.58    0.24 
   6 -21   1    0.75    0.30 
   6  21   1    0.74    0.27 
   6  21   1    0.83    0.28 
   6  21   1    0.81    0.28 
  -6  21  -1    0.23    0.22 
   6  21   1    0.75    0.27 
   7 -21   1   37.23    1.26 
   7 -21   1   36.59    1.13 
   7  21   1   36.64    1.15 
   7  21   1   37.16    1.07 
   7  21   1   36.27    1.17 
   7 -22  -1    3.57    0.41 
   7 -22  -1    4.18    0.60 
   7  22  -1    3.45    0.45 
   7  22  -1    4.15    0.47 
   7  22  -1    3.69    0.44 
   6 -22  -1    5.02    0.46 
   6 -22  -1    5.28    0.54 
   6 -22  -1    5.18    0.43 
   6  22  -1    5.34    0.54 
   6  22  -1    5.04    0.50 
  -6  22   1    4.63    0.45 
   6  22  -1    5.17    0.52 
  -5 -22   1    0.40    0.21 
   5 -22  -1    0.33    0.24 
   5 -22  -1    0.41    0.21 
   5 -22  -1    0.41    0.20 
   5  22  -1    0.40    0.23 
   5  22  -1    0.01    0.22 
  -5  22   1    0.92    0.26 
  -5  22   1    0.24    0.20 
   5  22  -1   -0.11    0.22 
   4 -22  -1   55.97    1.31 
   4 -22  -1   56.10    1.14 
   4 -22  -1   56.01    1.49 
   4 -22  -1   53.50    1.44 
   4  22  -1   53.39    1.43 
   4  22  -1   53.87    1.38 
  -4  22   1   56.27    1.34 
  -4  22   1   54.39    1.34 
   4  22  -1   55.71    1.22 
   3 -22  -1    7.47    0.33 
  -3 -22   1    6.89    0.34 
  -3 -22   1    7.81    0.26 
   3 -22  -1    7.33    0.34 
   3 -22  -1    7.96    0.46 
  -3 -22   1    7.59    0.30 
  -3 -22   1    7.78    0.28 
  -3  22   1    6.53    0.41 
   3  22  -1    7.48    0.44 
   3  22  -1    7.35    0.37 
  -3  22   1    6.87    0.50 
   3  22  -1    7.46    0.44 
  -3  22   1    7.37    0.37 
  -2 -22   1   38.65    0.95 
   2 -22  -1   37.74    0.88 
  -2 -22   1   37.15    0.83 
   2 -22  -1   38.44    1.04 
  -2 -22   1   38.57    0.92 
   2 -22  -1   36.56    0.80 
  -2 -22   1   37.14    0.87 
   2 -22  -1   37.19    1.01 
  -2  22   1   37.81    0.99 
   2  22  -1   37.73    1.06 
  -2  22   1   37.25    0.90 
  -2  22   1   37.81    1.15 
   2  22  -1   36.68    0.99 
   2  22  -1   36.92    0.85 
  -1 -22   1    3.07    0.25 
   1 -22  -1    3.06    0.29 
  -1 -22   1    2.70    0.24 
  -1 -22   1    3.26    0.24 
   1 -22  -1    2.93    0.18 
  -1 -22   1    2.92    0.27 
   1 -22  -1    3.39    0.27 
   1 -22  -1    2.64    0.21 
   1  22  -1    2.85    0.32 
   1  22  -1    3.06    0.25 
  -1  22   1    3.54    0.39 
   1  22  -1    2.66    0.30 
  -1  22   1    2.71    0.30 
   1  22  -1    2.97    0.17 
   0 -22  -1   71.61    1.36 
   0 -22   1   70.31    1.39 
   0 -22  -1   73.35    1.65 
   0 -22   1   71.91    1.71 
   0 -22   1   71.13    1.60 
   0 -22   1   72.49    1.68 
   0 -22  -1   71.88    1.63 
   0  22  -1   71.00    1.61 
   0  22  -1   70.96    1.82 
   0  22   1   70.20    1.80 
   0  22   1   70.89    1.62 
   0  22  -1   70.89    1.74 
   1 -22   1   -0.01    0.14 
   1 -22   1    0.24    0.10 
  -1 -22  -1    0.22    0.10 
  -1 -22  -1    0.00    0.11 
   1 -22   1    0.04    0.12 
   1 -22   1    0.29    0.15 
  -1 -22  -1    0.26    0.14 
   1 -22   1    0.26    0.16 
  -1 -22  -1    0.21    0.12 
  -1  22  -1    0.13    0.18 
  -1  22  -1    0.23    0.15 
   1  22   1    0.22    0.13 
   1  22   1    0.00    0.18 
   1  22   1    0.38    0.16 
   2 -22   1   80.70    2.15 
  -2 -22  -1   94.00    1.96 
   2 -22   1   88.15    1.97 
   2 -22   1   89.99    1.91 
   2 -22   1   90.79    2.16 
   2 -22   1   93.49    1.73 
  -2 -22  -1   91.11    1.70 
   2  22   1   90.04    1.89 
  -2  22  -1   93.26    2.25 
  -2  22  -1   90.54    1.97 
   2  22   1   92.84    2.13 
   2  22   1   89.62    2.00 
   2  22   1   90.58    1.72 
   2  22   1   93.06    2.18 
   3 -22   1    8.89    0.46 
   3 -22   1   10.13    0.52 
   3 -22   1    9.76    0.48 
   3 -22   1    8.79    0.38 
  -3 -22  -1    9.08    0.36 
  -3 -22  -1    9.58    0.35 
   3 -22   1    9.33    0.39 
  -3  22  -1    9.80    0.42 
   3  22   1    9.29    0.39 
  -3  22  -1    8.62    0.44 
   3  22   1    9.23    0.47 
   3  22   1    8.70    0.35 
   3  22   1    9.64    0.48 
  -4 -22  -1   97.52    1.91 
   4 -22   1  100.78    2.22 
   4 -22   1  102.60    2.47 
   4 -22   1   99.53    2.44 
   4  22   1  102.77    2.26 
  -4  22  -1  103.05    2.25 
   4  22   1  100.39    2.20 
   4  22   1  103.04    1.97 
  -4  22  -1  104.31    2.21 
  -5 -22  -1    0.27    0.19 
   5 -22   1    0.44    0.22 
   5 -22   1    0.79    0.26 
   5 -22   1    0.26    0.22 
  -5  22  -1    0.36    0.21 
   5  22   1    0.54    0.25 
   5  22   1    0.73    0.22 
   5  22   1    0.48    0.24 
   5  22   1    0.45    0.24 
  -5  22  -1    0.51    0.28 
   6 -22   1   57.72    1.47 
   6 -22   1   57.50    1.63 
   6  22   1   55.52    1.33 
   6  22   1   56.03    1.50 
  -6  22  -1   56.85    1.42 
   6  22   1   54.03    1.42 
   6  22   1   56.59    1.51 
   7 -22   1    1.11    0.36 
   7 -22   1    0.20    0.31 
   7  22   1    0.63    0.36 
   7  22   1    1.21    0.39 
   7  22   1    0.96    0.36 
   6 -23  -1   63.27    1.74 
   6 -23  -1   60.66    1.55 
   6 -23  -1   61.03    1.34 
   6  23  -1   61.74    1.68 
  -6  23   1   59.37    1.52 
   6  23  -1   61.67    1.44 
   6  23  -1   62.83    1.63 
   5 -23  -1    5.34    0.49 
   5 -23  -1    4.41    0.40 
   5  23  -1    4.35    0.46 
   5  23  -1    4.35    0.47 
  -5  23   1    5.14    0.46 
  -5  23   1    4.19    0.41 
   5  23  -1    4.67    0.48 
   4 -23  -1   37.63    0.84 
   4 -23  -1   35.71    1.07 
   4 -23  -1   36.38    0.96 
   4 -23  -1   37.93    1.13 
  -4 -23   1   35.83    0.86 
  -4  23   1   35.80    1.01 
   4  23  -1   35.50    0.91 
   4  23  -1   36.61    1.09 
   4  23  -1   37.27    1.06 
  -4  23   1   36.51    1.00 
   3 -23  -1   18.23    0.57 
  -3 -23   1   19.58    0.48 
   3 -23  -1   18.82    0.53 
   3 -23  -1   20.24    0.72 
  -3 -23   1   19.02    0.50 
  -3 -23   1   19.11    0.52 
   3  23  -1   18.27    0.68 
   3  23  -1   18.84    0.58 
  -3  23   1   18.61    0.60 
   3  23  -1   18.56    0.70 
  -3  23   1   17.87    0.65 
  -2 -23   1   54.85    1.26 
   2 -23  -1   53.23    1.07 
  -2 -23   1   44.71    1.25 
  -2 -23   1   52.83    1.10 
  -2 -23   1   54.22    1.24 
   2 -23  -1   55.04    1.18 
  -2 -23   1   50.33    1.17 
   2 -23  -1   52.43    1.33 
   2 -23  -1   54.63    1.37 
   2  23  -1   53.32    1.39 
  -2  23   1   54.01    1.49 
  -2  23   1   53.51    1.20 
  -2  23   1   51.38    1.29 
   2  23  -1   52.67    1.30 
   1 -23  -1   17.92    0.62 
  -1 -23   1   17.66    0.50 
  -1 -23   1   17.48    0.54 
  -1 -23   1   18.04    0.57 
  -1 -23   1   16.67    0.59 
   1 -23  -1   18.33    0.59 
   1 -23  -1   17.45    0.48 
   1 -23  -1   18.15    0.61 
  -1 -23   1   18.27    0.59 
   1  23  -1   16.79    0.44 
  -1  23   1   17.82    0.62 
  -1  23   1   18.17    0.74 
   1  23  -1   16.91    0.62 
   1  23  -1   17.66    0.66 
   0 -23  -1    3.17    0.24 
   0 -23  -1    2.99    0.28 
   0 -23   1    3.05    0.31 
   0 -23  -1    3.26    0.31 
   0 -23   1    2.48    0.28 
   0 -23   1    3.02    0.26 
   0 -23  -1    2.74    0.25 
   0 -23   1    3.09    0.30 
   0  23   1    3.30    0.33 
   0  23  -1    3.19    0.32 
   0  23   1    2.67    0.39 
   0  23  -1    3.06    0.40 
  -1 -23  -1   29.02    0.72 
  -1 -23  -1   27.22    0.70 
  -1 -23  -1   27.41    0.64 
   1 -23   1   28.50    0.82 
   1 -23   1   26.34    0.80 
   1 -23   1   27.52    0.85 
   1 -23   1   28.14    0.66 
   1 -23   1   27.33    0.68 
  -1 -23  -1   27.84    0.75 
  -1  23  -1   28.11    0.95 
   1  23   1   27.29    0.84 
  -1  23  -1   26.84    0.80 
   1  23   1   28.00    0.91 
   1  23   1   26.93    0.82 
  -2 -23  -1    0.47    0.16 
   2 -23   1    0.46    0.18 
  -2 -23  -1    0.36    0.15 
   2 -23   1    0.26    0.19 
   2 -23   1    0.28    0.16 
   2 -23   1    0.28    0.13 
  -2  23  -1    0.16    0.18 
  -2  23  -1    0.53    0.22 
   2  23   1    0.50    0.16 
   2  23   1    0.55    0.19 
   2  23   1    0.56    0.22 
   2  23   1    0.42    0.11 
   2  23   1    0.25    0.17 
   3 -23   1   38.24    0.96 
   3 -23   1   39.14    1.11 
   3 -23   1   38.48    0.88 
  -3 -23  -1   37.01    0.85 
   3 -23   1   38.39    1.14 
  -3 -23  -1   40.04    0.92 
   3  23   1   37.20    0.92 
   3  23   1   37.33    1.06 
   3  23   1   38.90    1.08 
   3  23   1   38.80    0.89 
  -3  23  -1   38.17    1.02 
   4 -23   1   10.47    0.58 
   4  23   1   10.29    0.47 
   4  23   1   10.05    0.55 
  -4  23  -1   10.41    0.51 
   4  23   1    9.55    0.43 
  -4  23  -1   10.59    0.51 
   4  23   1    9.99    0.53 
  -5 -23  -1   28.47    0.75 
   5 -23   1   29.14    0.88 
   5 -23   1   29.77    1.04 
   5 -23   1   27.95    0.78 
   5  23   1   30.32    0.95 
   5  23   1   28.54    0.85 
   5  23   1   29.58    0.97 
   5  23   1   29.16    0.83 
  -5  23  -1   29.45    0.93 
  -5  23  -1   29.80    0.90 
   6 -23   1   10.35    0.68 
   6 -23   1    8.95    0.56 
   6  23   1    8.46    0.57 
   6  23   1   10.24    0.66 
   6  23   1    8.88    0.63 
  -6  23  -1    9.82    0.56 
   6  23   1   10.43    0.61 
   6 -24  -1    1.89    0.35 
   6 -24  -1    2.57    0.42 
   6 -24  -1    2.67    0.36 
   6  24  -1    2.51    0.41 
   6  24  -1    2.85    0.42 
   6  24  -1    2.35    0.40 
  -6  24   1    2.26    0.34 
   5 -24  -1   75.43    1.79 
   5 -24  -1   76.07    2.00 
  -5  24   1   77.20    1.81 
  -5  24   1   74.74    1.83 
   5  24  -1   78.77    1.66 
   5  24  -1   77.70    1.96 
   5  24  -1   77.55    1.88 
   4 -24  -1    2.53    0.27 
   4 -24  -1    3.39    0.43 
  -4 -24   1    3.01    0.35 
   4 -24  -1    2.90    0.34 
   4  24  -1    3.22    0.42 
   4  24  -1    3.38    0.39 
   4  24  -1    2.66    0.34 
  -4  24   1    3.01    0.40 
  -3 -24   1   44.75    0.97 
   3 -24  -1   43.54    0.95 
   3 -24  -1   43.63    1.05 
   3 -24  -1   43.79    1.20 
   3 -24  -1   43.74    1.23 
  -3 -24   1   45.65    1.01 
  -3 -24   1   43.28    0.99 
   3  24  -1   42.43    1.17 
   3  24  -1   43.30    1.23 
  -3  24   1   43.49    1.15 
  -3  24   1   43.69    1.09 
   3  24  -1   43.50    1.01 
  -2 -24   1    0.06    0.16 
   2 -24  -1    0.35    0.21 
  -2 -24   1    0.19    0.14 
   2 -24  -1    0.45    0.20 
  -2 -24   1    0.31    0.16 
  -2 -24   1    0.44    0.15 
   2 -24  -1    0.42    0.15 
   2 -24  -1    0.44    0.16 
  -2  24   1    0.35    0.16 
   2  24  -1    0.45    0.20 
   2  24  -1    0.49    0.18 
   2  24  -1    0.53    0.20 
  -2  24   1    0.02    0.17 
  -1 -24   1    6.30    0.39 
   1 -24  -1    7.17    0.31 
  -1 -24   1    6.33    0.36 
   1 -24  -1    6.51    0.38 
  -1 -24   1    7.53    0.36 
  -1 -24   1    7.32    0.40 
  -1 -24   1    6.45    0.34 
   1 -24  -1    7.36    0.41 
  -1  24   1    6.22    0.52 
   1  24  -1    6.96    0.44 
   1  24  -1    7.35    0.44 
  -1  24   1    7.73    0.44 
   0 -24   1    4.09    0.36 
   0 -24   1    4.17    0.35 
   0 -24  -1    4.22    0.30 
   0 -24   1    3.79    0.33 
   0 -24   1    4.16    0.34 
   0 -24  -1    4.46    0.35 
   0 -24  -1    4.54    0.32 
   0 -24   1    4.44    0.30 
   0 -24  -1    4.45    0.27 
   0  24  -1    4.67    0.37 
   0  24   1    4.30    0.46 
   0  24   1    4.34    0.37 
   0  24  -1    3.99    0.46 
  -1 -24  -1    0.70    0.14 
   1 -24   1    0.81    0.18 
  -1 -24  -1    0.78    0.15 
   1 -24   1    0.80    0.20 
   1 -24   1    0.62    0.21 
  -1 -24  -1    0.47    0.19 
   1 -24   1    0.89    0.21 
  -1 -24  -1    0.66    0.17 
   1 -24   1    0.82    0.13 
   1  24   1    0.67    0.19 
  -1  24  -1    0.66    0.19 
  -1  24  -1    0.42    0.26 
   1  24   1    0.63    0.21 
   1  24   1    0.64    0.26 
   2 -24   1    1.15    0.18 
   2 -24   1    0.70    0.20 
   2 -24   1    1.33    0.24 
  -2 -24  -1    1.29    0.19 
   2 -24   1    1.30    0.25 
  -2 -24  -1    1.14    0.19 
  -2  24  -1    0.86    0.21 
   2  24   1    0.95    0.23 
   2  24   1    1.24    0.14 
   2  24   1    0.61    0.26 
   2  24   1    1.20    0.19 
   2  24   1    1.42    0.25 
   3 -24   1    0.78    0.25 
   3 -24   1    0.20    0.22 
  -3 -24  -1    0.68    0.17 
  -3 -24  -1    0.70    0.18 
   3 -24   1    0.78    0.19 
  -3  24  -1    0.20    0.19 
   3  24   1    0.48    0.21 
   3  24   1    0.60    0.23 
   3  24   1    0.58    0.20 
   3  24   1    0.60    0.16 
   4 -24   1    0.27    0.21 
   4 -24   1    0.64    0.23 
   4 -24   1    0.54    0.26 
   4  24   1    0.58    0.26 
  -4  24  -1    0.21    0.20 
  -4  24  -1    0.73    0.26 
   4  24   1    0.25    0.20 
   4  24   1    0.58    0.25 
   4  24   1    0.41    0.23 
   5 -24   1   23.53    0.79 
   5 -24   1   24.08    0.95 
   5 -24   1   25.42    0.75 
  -5  24  -1   25.40    0.83 
   5  24   1   24.45    0.89 
   5  24   1   23.82    0.78 
   5  24   1   23.71    0.88 
  -5  24  -1   25.03    0.88 
   5  24   1   23.26    0.77 
   6 -24   1    0.45    0.31 
   6 -24   1    0.58    0.33 
   6  24   1    0.64    0.33 
   6  24   1    0.53    0.33 
   6  24   1    0.76    0.34 
  -6  24  -1    0.88    0.28 
   6 -25  -1   54.18    1.63 
   6  25  -1   53.32    1.37 
   6  25  -1   54.88    1.59 
   5 -25  -1    3.88    0.44 
   5 -25  -1    3.87    0.45 
   5 -25  -1    4.06    0.46 
  -5  25   1    4.18    0.48 
   5  25  -1    4.01    0.52 
  -5  25   1    4.08    0.55 
   5  25  -1    3.76    0.40 
   5  25  -1    4.32    0.45 
   4 -25  -1   70.74    1.45 
   4 -25  -1   72.06    1.87 
   4  25  -1   72.02    1.77 
   4  25  -1   74.21    1.87 
   4  25  -1   71.80    1.54 
  -4  25   1   72.95    1.71 
  -4  25   1   70.83    1.71 
   3 -25  -1   23.34    0.82 
  -3 -25   1   23.64    0.67 
   3 -25  -1   24.75    0.69 
  -3 -25   1   23.58    0.59 
   3 -25  -1   23.86    0.64 
   3 -25  -1   24.59    0.84 
  -3  25   1   23.60    0.80 
   3  25  -1   24.26    0.86 
   3  25  -1   23.85    0.82 
  -3  25   1   23.72    0.72 
   3  25  -1   23.61    0.69 
  -2 -25   1   15.34    0.52 
   2 -25  -1   14.77    0.48 
   2 -25  -1   15.43    0.62 
  -2 -25   1   15.34    0.48 
   2 -25  -1   14.43    0.46 
   2  25  -1   14.88    0.65 
  -2  25   1   14.43    0.61 
   2  25  -1   14.31    0.51 
   2  25  -1   14.99    0.63 
  -1 -25   1   19.56    0.64 
   1 -25  -1   19.90    0.67 
   1 -25  -1   19.44    0.53 
  -1 -25   1   19.31    0.62 
   1 -25  -1   20.32    0.69 
  -1 -25   1   19.32    0.60 
   1 -25  -1   19.55    0.65 
   1  25  -1   19.69    0.74 
  -1  25   1   18.58    0.68 
   1  25  -1   18.58    0.69 
   0 -25   1    4.20    0.32 
   0 -25   1    4.64    0.37 
   0 -25   1    5.05    0.39 
   0 -25  -1    4.77    0.32 
   0 -25  -1    5.22    0.38 
   0 -25  -1    4.47    0.34 
   0 -25  -1    4.29    0.29 
   0 -25   1    4.73    0.37 
   0  25  -1    4.70    0.40 
   0  25   1    4.08    0.51 
   0  25   1    4.46    0.40 
  -1 -25  -1   18.91    0.61 
   1 -25   1   18.11    0.49 
  -1 -25  -1   19.08    0.53 
  -1 -25  -1   19.59    0.55 
   1 -25   1   18.35    0.56 
  -1 -25  -1   18.58    0.52 
   1 -25   1   18.49    0.70 
   1  25   1   18.45    0.79 
   1  25   1   19.19    0.71 
   1  25   1   19.19    0.69 
  -1  25  -1   17.48    0.66 
  -2 -25  -1    0.52    0.18 
   2 -25   1    0.44    0.16 
  -2 -25  -1    0.34    0.17 
   2 -25   1    0.08    0.22 
   2 -25   1    0.41    0.21 
   2  25   1    0.58    0.18 
  -2  25  -1    0.20    0.19 
   3 -25   1   22.13    0.83 
   3 -25   1   21.14    0.65 
  -3 -25  -1   21.25    0.61 
   3  25   1   22.11    0.79 
   3  25   1   21.87    0.64 
   3  25   1   20.31    0.59 
   3  25   1   22.17    0.79 
  -3  25  -1   21.38    0.75 
   4 -25   1    2.40    0.29 
  -4 -25  -1    2.34    0.27 
   4 -25   1    2.15    0.28 
   4 -25   1    2.25    0.38 
   4  25   1    2.46    0.34 
  -4  25  -1    2.72    0.31 
   4  25   1    2.36    0.34 
   4  25   1    2.41    0.31 
   4  25   1    2.63    0.37 
   5 -25   1   12.45    0.61 
   5 -25   1   12.93    0.74 
  -5  25  -1   13.21    0.64 
   5  25   1   13.75    0.63 
   5  25   1   12.54    0.69 
   5  25   1   12.99    0.71 
  -5  25  -1   13.22    0.71 
   5 -26  -1    1.47    0.34 
   5 -26  -1    1.38    0.39 
   5  26  -1    1.55    0.35 
   5  26  -1    1.77    0.37 
   5  26  -1    1.49    0.37 
  -5  26   1    1.67    0.33 
   4 -26  -1   20.38    0.69 
   4 -26  -1   20.30    0.85 
   4  26  -1   20.62    0.71 
   4  26  -1   20.78    0.83 
  -4  26   1   19.29    0.76 
   4  26  -1   20.62    0.85 
  -4  26   1   20.26    0.75 
  -3 -26   1    5.29    0.28 
   3 -26  -1    6.15    0.51 
   3 -26  -1    5.54    0.39 
   3 -26  -1    6.11    0.38 
  -3 -26   1    5.40    0.41 
   3 -26  -1    5.93    0.51 
   3  26  -1    4.87    0.49 
   3  26  -1    5.16    0.49 
  -3  26   1    5.32    0.42 
   3  26  -1    5.64    0.42 
  -3  26   1    4.49    0.45 
  -2 -26   1   62.29    1.39 
   2 -26  -1   63.05    1.59 
  -2 -26   1   64.17    1.46 
   2 -26  -1   61.30    1.26 
  -2 -26   1   60.40    1.30 
   2 -26  -1   61.74    1.36 
   2  26  -1   61.99    1.54 
   2  26  -1   62.10    1.33 
  -2  26   1   61.39    1.52 
   2  26  -1   63.20    1.66 
   1 -26  -1    0.07    0.18 
   1 -26  -1    0.05    0.20 
  -1 -26   1    0.33    0.20 
   1 -26  -1    0.28    0.21 
  -1 -26   1    0.58    0.18 
   1 -26  -1    0.02    0.22 
  -1 -26   1    0.52    0.21 
   1  26  -1    0.45    0.23 
   1  26  -1    0.24    0.20 
  -1  26   1   -0.07    0.19 
   0 -26  -1   67.88    1.56 
   0 -26  -1   64.84    1.54 
   0 -26   1   66.41    1.61 
   0 -26  -1   64.35    1.31 
   0 -26   1   67.17    1.56 
   0 -26   1   68.27    1.67 
   0  26  -1   64.59    1.58 
   0  26   1   63.44    1.58 
   1 -26   1    0.53    0.13 
  -1 -26  -1    0.55    0.19 
  -1 -26  -1    0.88    0.22 
  -1 -26  -1    0.45    0.14 
  -1 -26  -1    0.57    0.15 
   1 -26   1    0.68    0.23 
   1  26   1    0.44    0.33 
   1  26   1    0.87    0.22 
  -1  26  -1    0.52    0.21 
   2 -26   1  119.68    2.82 
  -2 -26  -1  121.77    2.58 
   2 -26   1  120.81    2.50 
  -2 -26  -1  119.32    2.24 
   2 -26   1  118.83    2.79 
   2  26   1  120.58    2.64 
   2  26   1  121.13    2.27 
   2  26   1  123.25    2.82 
  -2  26  -1  120.21    2.61 
   3 -26   1    2.93    0.31 
  -3 -26  -1    2.56    0.31 
   3 -26   1    2.53    0.36 
   3 -26   1    3.30    0.34 
   3  26   1    2.57    0.29 
  -3  26  -1    2.17    0.31 
   3  26   1    2.68    0.34 
   3  26   1    3.00    0.36 
  -4 -26  -1   70.09    1.46 
   4 -26   1   71.92    1.92 
   4 -26   1   71.22    1.67 
   4 -26   1   71.40    1.52 
  -4  26  -1   69.85    1.71 
   4  26   1   72.58    1.80 
   4  26   1   72.71    1.53 
   4  26   1   73.99    1.86 
   5 -26   1    0.81    0.32 
   5 -26   1    1.21    0.37 
   5  26   1    1.20    0.35 
   5  26   1    1.33    0.38 
   5  26   1    0.88    0.33 
  -5  26  -1    1.37    0.30 
   4 -27  -1    6.66    0.61 
   4 -27  -1    6.99    0.48 
  -4  27   1    4.74    0.50 
   4  27  -1    5.46    0.59 
   4  27  -1    5.53    0.53 
   4  27  -1    5.16    0.57 
   3 -27  -1   12.95    0.52 
   3 -27  -1   13.36    0.52 
   3 -27  -1   13.32    0.68 
   3  27  -1   13.27    0.58 
   3  27  -1   14.15    0.69 
   3  27  -1   13.64    0.71 
  -3  27   1   13.02    0.64 
   2 -27  -1    3.90    0.37 
  -2 -27   1    3.83    0.34 
   2 -27  -1    4.13    0.47 
   2 -27  -1    3.53    0.48 
  -2 -27   1    3.53    0.39 
  -2 -27   1    4.09    0.33 
   2 -27  -1    4.19    0.46 
   2  27  -1    3.22    0.36 
   2  27  -1    4.30    0.47 
  -2  27   1    3.56    0.44 
   2  27  -1    3.47    0.26 
  -1 -27   1   14.57    0.55 
  -1 -27   1   15.50    0.57 
  -1 -27   1   15.76    0.57 
   1 -27  -1   16.21    0.67 
  -1 -27   1   14.77    0.59 
   1 -27  -1   15.75    0.61 
   1 -27  -1   15.94    0.63 
   1 -27  -1   15.44    0.51 
   1  27  -1   16.54    0.70 
   1  27  -1   16.18    0.68 
  -1  27   1   15.02    0.65 
   0 -27  -1    6.95    0.39 
   0 -27  -1    7.34    0.41 
   0 -27  -1    6.88    0.38 
   0 -27  -1    6.97    0.47 
   0 -27   1    6.98    0.41 
   0 -27   1    6.21    0.45 
   0 -27   1    7.26    0.46 
   0  27   1    5.11    0.46 
   0  27  -1    6.46    0.48 
   1 -27   1   61.03    1.36 
  -1 -27  -1   63.82    1.30 
  -1 -27  -1   64.23    1.52 
  -1 -27  -1   66.68    1.44 
   1 -27   1   64.69    1.62 
   1 -27   1   64.19    1.65 
  -1  27  -1   63.26    1.57 
   1  27   1   64.66    1.60 
  -2 -27  -1    0.58    0.22 
   2 -27   1   -0.09    0.24 
   2 -27   1    0.52    0.19 
   2 -27   1    0.22    0.27 
   2  27   1    0.31    0.25 
   2  27   1    0.48    0.26 
  -2  27  -1    0.44    0.24 
   3 -27   1   26.13    0.75 
  -3 -27  -1   24.68    0.71 
   3 -27   1   25.17    0.76 
   3 -27   1   26.42    0.97 
   3  27   1   27.00    0.94 
  -3  27  -1   24.26    0.87 
   3  27   1   25.28    0.75 
   3  27   1   27.05    0.94 
   4 -27   1    1.07    0.29 
   4 -27   1    0.69    0.33 
   4  27   1    0.94    0.34 
   4  27   1    0.79    0.30 
  -4  27  -1    0.66    0.28 
   4  27   1    0.96    0.32 
   4  28  -1    6.67    0.57 
   4  28  -1    7.37    0.70 
   3 -28  -1   24.07    0.92 
  -3  28   1   23.18    0.87 
   3  28  -1   24.54    0.92 
   3  28  -1   23.37    0.77 
   3  28  -1   24.68    0.96 
   2 -28  -1   13.07    0.65 
   2 -28  -1   13.32    0.68 
   2 -28  -1   13.99    0.66 
  -2  28   1   13.28    0.66 
   2  28  -1   13.60    0.71 
   2  28  -1   12.96    0.69 
   1 -28  -1   10.26    0.54 
   1 -28  -1   10.69    0.60 
   1 -28  -1   11.12    0.48 
  -1 -28   1   11.04    0.50 
  -1 -28   1   11.14    0.53 
  -1 -28   1   10.21    0.51 
   1  28  -1   10.18    0.60 
  -1  28   1   11.29    0.60 
   0 -28  -1   13.01    0.60 
   0 -28  -1   12.92    0.49 
   0 -28   1   12.45    0.52 
   0 -28   1   11.81    0.59 
   0 -28  -1   13.35    0.53 
   0  28   1   11.21    0.62 
   0  28  -1   11.62    0.63 
   1 -28   1    3.56    0.48 
  -1 -28  -1    4.28    0.43 
   1 -28   1    3.86    0.48 
   1 -28   1    3.64    0.34 
   1 -28   1    3.44    0.48 
  -1  28  -1    3.54    0.46 
   1  28   1    4.60    0.48 
  -2 -28  -1   20.41    0.65 
   2 -28   1   18.97    0.82 
  -2 -28  -1   20.61    0.67 
   2 -28   1   20.16    0.68 
   2  28   1   20.95    0.84 
   2  28   1   20.27    0.83 
  -2  28  -1   19.00    0.77 
   3 -28   1    4.24    0.46 
   3  28   1    3.63    0.44 
   3  28   1    4.05    0.38 
  -3  28  -1    3.87    0.42 
   3  28   1    4.18    0.56 
   2 -29  -1   22.56    0.85 
   2 -29  -1   21.51    0.87 
  -2  29   1   22.11    0.86 
   2  29  -1   22.10    0.92 
   2  29  -1   22.49    0.88 
   1 -29  -1    3.66    0.43 
  -1 -29   1    3.80    0.45 
  -1 -29   1    3.76    0.43 
   1 -29  -1    3.48    0.48 
  -1  29   1    3.83    0.50 
   1  29  -1    4.43    0.51 
   0 -29  -1   14.78    0.68 
   0 -29   1   14.57    0.60 
   0 -29   1   15.99    0.67 
   0 -29   1   15.16    0.67 
   0  29  -1   15.10    0.72 
   0  29   1   15.06    0.71 
   1 -29   1   16.59    0.72 
   1 -29   1   15.91    0.74 
  -1 -29  -1   16.13    0.65 
   1 -29   1   15.94    0.63 
   1 -29   1   16.48    0.73 
   1  29   1   16.23    0.76 
  -1  29  -1   16.26    0.72 
   2 -29   1    0.50    0.32 
  -2  29  -1    0.69    0.29 
   2  29   1    0.66    0.31 
   0 -30  -1   32.51    1.03 
   0 -30   1   33.44    1.02 
   0 -30   1   32.76    1.03 
  10   0  -2   58.79    1.69 
  10   0  -2   56.58    1.40 
  10   0  -2   58.21    1.59 
  -9   0   2   -0.03    0.17 
   9   0  -2    0.39    0.23 
   9   0  -2   -0.05    0.21 
   9   0  -2   -0.12    0.23 
   8   0  -2   20.95    0.72 
  -8   0   2   21.20    0.65 
   8   0  -2   20.88    0.65 
   8   0  -2   21.43    0.77 
  -7   0   2    0.03    0.11 
  -7   0   2    0.20    0.13 
   7   0  -2    0.21    0.13 
   7   0  -2    0.10    0.14 
   7   0  -2    0.06    0.13 
   6   0  -2    0.23    0.11 
  -6   0   2    0.18    0.09 
  -6   0   2    0.07    0.10 
   6   0  -2    0.14    0.13 
   6   0  -2    0.14    0.11 
  -5   0   2    0.46    0.10 
   5   0  -2    0.24    0.11 
   5   0  -2    0.20    0.09 
  -5   0   2    0.14    0.08 
   5   0  -2    0.18    0.10 
   4   0  -2   20.49    0.57 
  -4   0   2   21.63    0.55 
   4   0  -2   20.76    0.47 
  -4   0   2   20.91    0.52 
   4   0  -2   20.39    0.53 
  -4   0   2   20.03    0.45 
   3   0  -2   -0.04    0.05 
   3   0  -2    0.08    0.05 
  -3   0   2    0.09    0.05 
   3   0  -2    0.20    0.05 
  -3   0   2    0.20    0.05 
  -3   0   2    0.17    0.05 
  -2   0   2   48.13    1.00 
  -2   0   2   47.38    1.05 
   2   0  -2   47.73    1.00 
   2   0  -2   47.40    0.86 
  -2   0   2   48.99    0.86 
   2   0  -2   48.13    1.06 
   1   0  -2    0.07    0.03 
   1   0  -2    0.03    0.02 
  -1   0   2    0.12    0.02 
  -1   0   2    0.09    0.03 
  -1   0   2    0.09    0.03 
   1   0  -2    0.05    0.02 
   0   0   2  771.60   15.59 
   0   0  -2  657.85   15.11 
   0   0  -2  795.52   15.58 
   0   0   2  749.85   15.17 
   0   0  -2  799.37   15.09 
   1   0   2    0.04    0.03 
  -1   0  -2    0.07    0.03 
   1   0   2    0.06    0.03 
   2   0   2  986.00   19.57 
   2   0   2 1000.00   20.34 
  -2   0  -2  971.46   19.83 
  -2   0  -2  979.24   19.55 
   2   0   2  983.81   19.86 
   3   0   2    0.14    0.05 
   3   0   2    0.06    0.06 
   3   0   2    0.06    0.05 
  -3   0  -2    0.11    0.05 
   4   0   2  119.23    2.53 
  -4   0  -2  121.70    2.49 
   4   0   2  122.57    2.50 
   4   0   2  120.81    2.59 
   5   0   2    0.14    0.09 
  -5   0  -2    0.19    0.08 
   5   0   2    0.02    0.09 
   5   0   2    0.02    0.09 
   6   0   2  123.12    2.61 
   6   0   2  120.56    2.26 
  -6   0  -2  123.07    2.56 
   6   0   2  119.73    2.68 
   6   0   2  120.76    2.58 
   7   0   2    0.24    0.14 
  -7   0  -2    0.19    0.13 
   7   0   2    0.00    0.15 
   7   0   2    0.26    0.14 
   7   0   2    0.24    0.13 
   8   0   2  101.82    2.45 
   8   0   2  103.54    2.08 
   8   0   2  106.44    2.39 
   8   0   2  109.00    2.38 
   9   0   2    0.32    0.21 
   9   0   2   -0.08    0.23 
   9   0   2    0.43    0.23 
  10   0   2   41.03    1.24 
  10   0   2   39.12    1.11 
  10   0   2   39.56    1.30 
  10  -1  -2   18.65    0.75 
  10  -1  -2   19.77    0.84 
  10  -1  -2   19.84    0.91 
  10   1  -2   20.06    0.86 
  10   1  -2   19.91    0.91 
  10   1  -2   19.14    0.77 
   9  -1  -2    7.19    0.50 
  -9  -1   2    7.07    0.44 
   9  -1  -2    7.04    0.46 
   9  -1  -2    6.85    0.54 
   9   1  -2    6.85    0.45 
   9   1  -2    6.92    0.48 
   9   1  -2    6.93    0.53 
  -9   1   2    7.10    0.41 
   8  -1  -2   44.76    1.21 
   8  -1  -2   45.33    1.06 
  -8  -1   2   48.06    1.14 
   8  -1  -2   45.20    1.28 
   8   1  -2   45.81    1.21 
   8   1  -2   44.71    1.27 
   8   1  -2   45.65    1.08 
  -8   1   2   46.30    1.15 
  -7  -1   2    6.05    0.30 
   7  -1  -2    5.78    0.38 
   7  -1  -2    5.83    0.35 
   7  -1  -2    6.11    0.33 
  -7  -1   2    6.01    0.31 
   7   1  -2    6.22    0.35 
   7   1  -2    5.91    0.38 
  -7   1   2    5.69    0.31 
   7   1  -2    6.15    0.33 
  -6  -1   2   80.35    1.72 
   6  -1  -2   75.31    1.70 
   6  -1  -2   74.74    1.79 
  -6  -1   2   75.22    1.65 
   6  -1  -2   76.59    1.48 
   6   1  -2   73.87    1.69 
  -6   1   2   80.00    1.74 
   6   1  -2   75.41    1.48 
   6   1  -2   74.23    1.78 
  -6   1   2   73.82    1.66 
  -5  -1   2   15.09    0.44 
   5  -1  -2   14.86    0.40 
  -5  -1   2   14.10    0.42 
   5  -1  -2   14.81    0.48 
   5  -1  -2   14.43    0.45 
   5   1  -2   14.55    0.47 
  -5   1   2   14.62    0.44 
   5   1  -2   14.00    0.44 
   5   1  -2   13.89    0.40 
  -5   1   2   14.06    0.42 
   4  -1  -2    8.13    0.25 
  -4  -1   2    7.60    0.26 
   4  -1  -2    7.21    0.27 
   4  -1  -2    7.62    0.29 
  -4  -1   2    7.97    0.23 
  -4  -1   2    7.80    0.27 
   4   1  -2    7.80    0.29 
   4   1  -2    7.58    0.24 
   4   1  -2    7.37    0.27 
  -4   1   2    7.98    0.27 
  -4   1   2    8.60    0.28 
   3  -1  -2   60.69    1.38 
  -3  -1   2   62.71    1.29 
  -3  -1   2   64.07    1.36 
   3  -1  -2   61.45    1.31 
   3  -1  -2   62.74    1.13 
  -3  -1   2   60.64    1.12 
  -3   1   2   60.83    1.30 
  -3   1   2   61.86    1.12 
   3   1  -2   59.81    1.37 
   3   1  -2   62.09    1.30 
   3   1  -2   62.07    1.13 
  -3   1   2   63.90    1.37 
   2  -1  -2  382.23    7.74 
   2  -1  -2  374.00    8.05 
   2  -1  -2  381.22    6.59 
  -2  -1   2  388.62    6.69 
  -2  -1   2  389.84    8.05 
  -2  -1   2  368.37    7.61 
   2   1  -2  386.28    6.70 
  -2   1   2  378.81    6.64 
   2   1  -2  387.83    8.10 
  -2   1   2  380.64    8.05 
  -2   1   2  370.70    7.65 
   2   1  -2  370.82    7.68 
   1  -1  -2  174.19    3.73 
   1  -1  -2  170.94    3.41 
   1  -1  -2  175.10    3.63 
  -1  -1   2  174.93    3.10 
  -1  -1   2  185.96    3.61 
  -1  -1   2  171.57    3.72 
  -1   1   2  175.78    3.07 
   1   1  -2  177.26    3.71 
  -1   1   2  180.62    3.66 
   1   1  -2  174.31    3.06 
  -1   1   2  177.08    3.79 
   0  -1  -2   83.57    1.72 
   0  -1   2   83.57    1.76 
   0  -1  -2   80.16    1.65 
   0  -1  -2   81.02    1.68 
   0  -1   2   83.20    1.45 
   0  -1   2   83.69    1.69 
   0  -1  -2   81.00    1.56 
   0   1   2   79.22    1.65 
   0   1  -2   80.01    1.41 
   0   1  -2   80.04    1.69 
   0   1  -2   79.42    1.65 
   0   1  -2   82.13    1.71 
   0   1   2   82.47    1.75 
   0   1   2   81.10    1.56 
   0   1   2   81.46    1.70 
   1  -1   2  226.82    4.58 
   1  -1   2  218.40    4.50 
  -1  -1  -2  215.03    4.44 
   1  -1   2  220.43    4.19 
  -1   1  -2  212.22    4.49 
   1   1   2  220.76    4.46 
   1   1   2  215.13    4.42 
   2  -1   2   30.36    0.68 
  -2  -1  -2   31.12    0.67 
   2  -1   2   30.45    0.67 
   2   1   2   28.92    0.68 
   2   1   2   30.57    0.67 
  -2   1  -2   30.25    0.68 
  -3  -1  -2   75.42    1.56 
   3  -1   2   75.26    1.59 
   3  -1   2   74.72    1.63 
   3  -1   2   75.19    1.58 
   3   1   2   73.78    1.59 
  -3   1  -2   75.78    1.57 
   3   1   2   75.69    1.57 
   3   1   2   76.11    1.60 
  -4  -1  -2    1.40    0.13 
   4  -1   2    1.32    0.14 
   4  -1   2    1.24    0.13 
   4  -1   2    1.13    0.13 
   4   1   2    1.32    0.13 
   4   1   2    1.22    0.13 
  -4   1  -2    1.37    0.13 
   4   1   2    1.04    0.12 
   4   1   2    0.91    0.11 
   5  -1   2   49.42    1.14 
   5  -1   2   49.11    0.99 
  -5  -1  -2   48.80    1.11 
   5  -1   2   47.54    1.16 
  -5   1  -2   47.75    1.13 
   5   1   2   48.07    1.14 
   5   1   2   48.43    1.15 
   5   1   2   49.81    1.00 
   5   1   2   49.25    1.13 
   6  -1   2    5.74    0.31 
   6  -1   2    6.11    0.30 
   6  -1   2    5.66    0.29 
  -6  -1  -2    6.00    0.29 
   6  -1   2    5.46    0.31 
   6   1   2    5.64    0.31 
   6   1   2    5.09    0.30 
   6   1   2    6.12    0.31 
  -6   1  -2    5.80    0.29 
   6   1   2    5.40    0.29 
   7  -1   2   17.24    0.61 
   7  -1   2   17.67    0.55 
  -7  -1  -2   17.84    0.57 
   7  -1   2   17.69    0.61 
   7  -1   2   18.68    0.60 
   7   1   2   17.64    0.55 
   7   1   2   17.90    0.60 
   7   1   2   16.46    0.59 
  -7   1  -2   18.13    0.58 
   8  -1   2    6.11    0.38 
   8  -1   2    6.82    0.43 
   8  -1   2    6.20    0.39 
   8  -1   2    6.06    0.43 
   8  -1   2    6.18    0.40 
   8   1   2    6.97    0.41 
   8   1   2    6.68    0.40 
   8   1   2    6.06    0.43 
  -8   1  -2    6.64    0.38 
   8   1   2    6.44    0.42 
   9  -1   2   10.82    0.60 
   9  -1   2   10.29    0.53 
   9   1   2   10.35    0.57 
   9   1   2   10.52    0.53 
   9   1   2   10.04    0.59 
  10  -1   2   18.71    0.88 
  10  -1   2   19.49    0.77 
  10  -1   2   20.71    0.87 
  10   1   2   20.82    0.86 
  10   1   2   20.87    0.79 
  10   1   2   18.49    0.89 
  10  -2  -2    0.19    0.28 
  10  -2  -2    0.56    0.31 
  10  -2  -2    0.15    0.36 
  10   2  -2    0.56    0.33 
  10   2  -2    0.70    0.32 
  10   2  -2    0.17    0.32 
   9  -2  -2   37.75    0.98 
   9  -2  -2   37.57    1.12 
   9  -2  -2   37.01    1.17 
  -9  -2   2   36.07    1.02 
  -9  -2   2   38.19    0.94 
   9   2  -2   37.69    0.99 
  -9   2   2   37.33    1.01 
   9   2  -2   36.79    1.09 
   9   2  -2   36.34    1.16 
  -8  -2   2    6.83    0.34 
   8  -2  -2    7.35    0.40 
   8  -2  -2    7.42    0.44 
   8  -2  -2    6.58    0.47 
  -8   2   2    6.56    0.38 
   8   2  -2    6.71    0.40 
   8   2  -2    7.24    0.43 
   8   2  -2    6.84    0.46 
   7  -2  -2   68.65    1.39 
  -7  -2   2   66.08    1.52 
   7  -2  -2   68.35    1.60 
   7  -2  -2   67.71    1.68 
  -7  -2   2   70.83    1.56 
   7   2  -2   65.82    1.57 
  -7   2   2   65.35    1.54 
   7   2  -2   67.88    1.40 
  -7   2   2   70.29    1.60 
   7   2  -2   66.00    1.65 
   6  -2  -2    0.13    0.12 
  -6  -2   2    0.03    0.09 
   6  -2  -2   -0.01    0.12 
  -6  -2   2    0.08    0.09 
   6  -2  -2    0.04    0.11 
  -6   2   2   -0.07    0.10 
   6   2  -2   -0.08    0.12 
  -6   2   2    0.23    0.12 
   6   2  -2    0.14    0.11 
   6   2  -2   -0.06    0.11 
   5  -2  -2   87.57    1.57 
  -5  -2   2   82.37    1.77 
  -5  -2   2   83.18    1.55 
   5  -2  -2   84.10    1.92 
   5  -2  -2   81.82    1.81 
  -5  -2   2   87.20    1.85 
  -5   2   2   88.39    1.88 
   5   2  -2   83.34    1.58 
   5   2  -2   82.73    1.80 
   5   2  -2   82.66    1.90 
  -5   2   2   80.74    1.78 
   4  -2  -2    4.04    0.18 
  -4  -2   2    4.61    0.19 
   4  -2  -2    4.06    0.22 
  -4  -2   2    4.50    0.18 
   4  -2  -2    4.00    0.20 
  -4  -2   2    4.36    0.17 
  -4   2   2    4.30    0.21 
   4   2  -2    4.30    0.19 
   4   2  -2    4.28    0.20 
   4   2  -2    3.86    0.21 
  -4   2   2    4.27    0.19 
  -3  -2   2  113.89    1.95 
   3  -2  -2  112.71    1.95 
   3  -2  -2  104.54    2.26 
  -3  -2   2  113.09    2.24 
   3  -2  -2  110.39    2.39 
  -3  -2   2  116.57    2.37 
   3   2  -2  113.08    2.38 
  -3   2   2  112.93    2.38 
   3   2  -2  108.15    2.25 
  -3   2   2  109.05    2.25 
   3   2  -2  107.62    1.96 
   2  -2  -2   13.42    0.32 
   2  -2  -2   13.49    0.34 
   2  -2  -2   13.61    0.28 
  -2  -2   2   13.39    0.35 
  -2  -2   2   13.28    0.32 
  -2   2   2   13.72    0.34 
  -2   2   2   13.02    0.28 
   2   2  -2   13.42    0.33 
   2   2  -2   13.45    0.35 
   1  -2  -2  137.98    2.45 
   1  -2  -2  141.43    2.79 
   1  -2  -2  139.88    2.94 
  -1  -2   2  140.64    2.48 
   1  -2  -2  141.03    2.90 
  -1  -2   2  138.53    2.86 
  -1  -2   2  139.73    2.92 
  -1   2   2  145.97    3.04 
  -1   2   2  142.06    2.45 
   1   2  -2  142.14    2.88 
  -1   2   2  143.58    2.88 
   1   2  -2  140.53    2.48 
  -1   2   2  133.49    2.67 
   1   2  -2  136.95    3.00 
   0  -2  -2    7.98    0.19 
   0  -2  -2    7.70    0.20 
   0  -2  -2    8.05    0.17 
   0  -2   2    7.57    0.17 
   0  -2   2    8.28    0.17 
   0   2   2    7.44    0.20 
   0   2   2    7.69    0.17 
   0   2  -2    7.87    0.20 
   0   2  -2    8.00    0.17 
   0   2   2    7.94    0.18 
   0   2   2    7.52    0.19 
  -1  -2  -2   14.33    0.34 
   1  -2   2   14.63    0.30 
   1  -2   2   14.53    0.34 
   1  -2   2   13.69    0.34 
  -1  -2  -2   13.95    0.34 
  -1   2  -2   14.79    0.30 
   1   2   2   14.72    0.34 
   1   2   2   14.42    0.34 
  -2  -2  -2   21.96    0.50 
   2  -2   2   21.38    0.52 
   2  -2   2   21.81    0.47 
   2  -2   2   21.43    0.52 
   2  -2   2   22.44    0.52 
   2   2   2   22.52    0.50 
   2   2   2   21.60    0.52 
  -2   2  -2   22.70    0.52 
  -2   2  -2   22.47    0.52 
   3  -2   2   65.79    1.39 
   3  -2   2   63.45    1.39 
  -3  -2  -2   64.21    1.36 
   3  -2   2   63.15    1.43 
   3   2   2   65.40    1.38 
   3   2   2   63.68    1.39 
  -3   2  -2   67.25    1.40 
   3   2   2   66.27    1.37 
   3   2   2   66.03    1.20 
   4  -2   2   26.24    0.67 
   4  -2   2   26.62    0.68 
   4  -2   2   25.81    0.66 
  -4  -2  -2   26.71    0.64 
   4   2   2   26.69    0.65 
   4   2   2   26.88    0.59 
   4   2   2   25.92    0.67 
  -4   2  -2   27.45    0.66 
   4   2   2   25.65    0.64 
  -4   2  -2   28.01    0.63 
  -5  -2  -2    2.21    0.17 
   5  -2   2    2.09    0.19 
   5  -2   2    2.26    0.19 
  -5   2  -2    2.25    0.14 
   5   2   2    2.10    0.18 
   5   2   2    2.21    0.17 
   5   2   2    2.42    0.19 
   5   2   2    2.52    0.19 
   6  -2   2   11.59    0.44 
   6  -2   2   11.12    0.44 
  -6  -2  -2   11.89    0.41 
   6  -2   2   11.41    0.39 
   6  -2   2   11.60    0.42 
   6   2   2   11.70    0.44 
   6   2   2   10.99    0.42 
  -6   2  -2   12.15    0.42 
   6   2   2   11.58    0.43 
   6   2   2   11.22    0.40 
   7  -2   2   29.49    0.79 
   7  -2   2   28.92    0.74 
   7  -2   2   29.54    0.83 
  -7  -2  -2   30.00    0.80 
   7  -2   2   28.85    0.86 
   7   2   2   29.14    0.75 
  -7   2  -2   28.83    0.80 
   7   2   2   29.90    0.83 
   7   2   2   28.25    0.83 
   8  -2   2    6.38    0.39 
   8  -2   2    6.16    0.38 
   8  -2   2    5.81    0.38 
   8  -2   2    5.87    0.42 
   8   2   2    5.49    0.42 
  -8   2  -2    5.74    0.37 
   8   2   2    6.01    0.38 
   8   2   2    5.23    0.40 
   9  -2   2   28.13    0.97 
   9  -2   2   29.98    0.95 
   9  -2   2   28.14    0.84 
   9   2   2   30.67    0.96 
   9   2   2   28.43    0.86 
   9   2   2   27.25    0.95 
  10  -2   2    1.86    0.33 
  10  -2   2    2.06    0.37 
  10  -2   2    2.89    0.44 
  10   2   2    1.90    0.36 
  10   2   2    1.89    0.42 
  10   2   2    2.49    0.39 
  10  -3  -2   38.59    1.22 
  10  -3  -2   37.66    1.31 
  10  -3  -2   38.08    1.08 
  10   3  -2   39.08    1.10 
  10   3  -2   39.33    1.30 
  10   3  -2   39.78    1.23 
   9  -3  -2    2.28    0.34 
   9  -3  -2    3.21    0.37 
   9  -3  -2    2.83    0.34 
  -9  -3   2    2.80    0.35 
  -9  -3   2    2.32    0.27 
   9   3  -2    2.54    0.35 
  -9   3   2    2.75    0.36 
   9   3  -2    2.69    0.30 
   9   3  -2    3.05    0.36 
  -8  -3   2   98.94    2.29 
  -8  -3   2  108.83    2.30 
   8  -3  -2  106.11    2.06 
   8  -3  -2  104.66    2.51 
   8  -3  -2  105.63    2.38 
   8   3  -2  106.98    2.35 
   8   3  -2  105.53    2.08 
  -8   3   2   98.62    2.31 
   8   3  -2  104.08    2.48 
  -8   3   2  108.85    2.39 
  -7  -3   2    2.32    0.22 
   7  -3  -2    2.31    0.26 
   7  -3  -2    2.07    0.25 
  -7  -3   2    2.44    0.24 
   7  -3  -2    2.43    0.28 
  -7   3   2    2.52    0.24 
  -7   3   2    2.07    0.25 
   7   3  -2    2.60    0.27 
   7   3  -2    2.36    0.27 
   7   3  -2    2.37    0.30 
  -6  -3   2  115.55    2.49 
  -6  -3   2  125.96    2.59 
   6  -3  -2  116.58    2.69 
   6  -3  -2  120.64    2.21 
   6  -3  -2  119.18    2.44 
   6  -3  -2  117.16    2.55 
   6   3  -2  119.41    2.67 
   6   3  -2  120.60    2.23 
   6   3  -2  120.89    2.54 
  -6   3   2  123.17    2.68 
  -6   3   2  118.51    2.52 
   5  -3  -2    1.13    0.15 
   5  -3  -2    0.98    0.12 
  -5  -3   2    1.14    0.13 
  -5  -3   2    1.15    0.13 
   5  -3  -2    1.05    0.15 
  -5  -3   2    1.33    0.13 
   5   3  -2    1.16    0.15 
   5   3  -2    1.20    0.17 
   5   3  -2    1.26    0.14 
  -5   3   2    1.07    0.13 
   4  -3  -2  316.46    6.41 
  -4  -3   2  320.81    6.47 
   4  -3  -2  328.28    5.60 
   4  -3  -2  318.70    6.14 
  -4  -3   2  339.15    6.80 
   4  -3  -2  318.88    6.85 
  -4  -3   2  317.76    5.53 
   4   3  -2  319.91    5.55 
   4   3  -2  320.37    6.56 
  -4   3   2  337.89    6.75 
   4   3  -2  324.89    6.81 
  -4   3   2  322.46    6.40 
   3  -3  -2   26.91    0.53 
   3  -3  -2   25.20    0.62 
   3  -3  -2   25.71    0.59 
  -3  -3   2   25.70    0.53 
   3  -3  -2   26.48    0.66 
  -3  -3   2   26.37    0.59 
  -3  -3   2   26.76    0.63 
   3   3  -2   25.36    0.54 
  -3   3   2   26.34    0.65 
   3   3  -2   27.20    0.61 
   3   3  -2   26.27    0.65 
  -2  -3   2  391.52    7.84 
   2  -3  -2  388.31    8.41 
   2  -3  -2  387.79    6.79 
   2  -3  -2  385.50    7.60 
  -2  -3   2  398.52    8.28 
   2  -3  -2  377.06    8.00 
  -2  -3   2  395.43    6.90 
   2   3  -2  398.22    7.89 
  -2   3   2  393.52    8.30 
  -2   3   2  391.46    8.00 
   2   3  -2  410.19    8.44 
   2   3  -2  389.74    6.88 
   1  -3  -2    3.10    0.11 
  -1  -3   2    3.13    0.08 
  -1  -3   2    3.02    0.12 
   1  -3  -2    3.37    0.10 
   1  -3  -2    2.94    0.11 
  -1   3   2    3.02    0.10 
  -1   3   2    3.17    0.12 
   1   3  -2    3.13    0.09 
  -1   3   2    3.25    0.11 
   0  -3  -2   88.27    1.86 
   0  -3  -2   89.94    1.86 
   0  -3   2   89.21    1.57 
   0  -3   2   94.19    1.78 
   0  -3  -2   92.48    1.80 
   0  -3  -2   92.79    1.91 
   0  -3   2   90.95    1.92 
   0   3   2   93.81    1.86 
   0   3  -2   92.44    1.92 
   0   3   2   92.37    1.89 
   0   3   2   91.48    1.75 
   0   3  -2   85.47    1.74 
   0   3   2   94.79    1.94 
   1  -3   2   27.00    0.54 
   1  -3   2   27.59    0.59 
   1  -3   2   27.07    0.59 
  -1  -3  -2   28.14    0.60 
   1  -3   2   26.91    0.61 
  -1  -3  -2   26.60    0.59 
   1  -3   2   26.73    0.62 
   1   3   2   27.68    0.60 
   1   3   2   27.65    0.55 
   1   3   2   26.21    0.59 
  -1   3  -2   26.91    0.54 
   1   3   2   26.68    0.49 
  -1   3  -2   26.28    0.59 
  -2  -3  -2  173.98    3.49 
   2  -3   2  170.37    3.62 
   2  -3   2  170.76    3.27 
   2  -3   2  173.26    3.52 
   2  -3   2  169.52    3.44 
   2   3   2  176.04    2.97 
  -2   3  -2  178.14    3.67 
   2   3   2  167.99    3.48 
  -2   3  -2  167.68    3.52 
   2   3   2  171.80    3.49 
  -2   3  -2  176.04    3.44 
   2   3   2  179.78    3.58 
   3  -3   2  112.96    2.31 
   3  -3   2  109.19    2.41 
   3  -3   2  109.80    2.32 
   3  -3   2  111.91    2.18 
  -3  -3  -2  113.15    2.28 
  -3   3  -2  118.02    2.39 
   3   3   2  113.09    1.99 
   3   3   2  111.95    2.33 
   3   3   2  114.23    2.28 
  -3   3  -2  113.16    2.30 
   3   3   2  110.02    2.34 
   4  -3   2   68.92    1.60 
   4  -3   2   70.56    1.55 
  -4  -3  -2   72.04    1.51 
   4  -3   2   71.52    1.55 
   4  -3   2   70.08    1.45 
   4   3   2   69.81    1.54 
   4   3   2   72.59    1.34 
   4   3   2   72.23    1.52 
   4   3   2   70.18    1.55 
  -4   3  -2   71.19    1.54 
  -4   3  -2   75.33    1.56 
   5  -3   2   35.81    0.94 
   5  -3   2   36.35    0.85 
   5  -3   2   36.94    0.91 
  -5  -3  -2   37.87    0.88 
   5   3   2   37.78    0.89 
   5   3   2   35.25    0.88 
  -5   3  -2   36.35    0.89 
   5   3   2   36.49    0.91 
  -5   3  -2   39.59    0.87 
   5   3   2   37.00    0.80 
   6  -3   2   56.83    1.42 
   6  -3   2   59.21    1.29 
   6  -3   2   59.77    1.38 
  -6  -3  -2   58.22    1.32 
   6  -3   2   58.18    1.36 
   6  -3   2   56.93    1.19 
  -6   3  -2   57.87    1.35 
  -6   3  -2   60.76    1.31 
   6   3   2   55.64    1.37 
   6   3   2   58.92    1.38 
   6   3   2   58.30    1.21 
   6   3   2   59.68    1.36 
   7  -3   2   25.29    0.80 
   7  -3   2   25.43    0.68 
  -7  -3  -2   26.21    0.72 
   7  -3   2   25.92    0.72 
   7  -3   2   26.14    0.75 
   7  -3   2   25.43    0.79 
   7   3   2   24.95    0.76 
   7   3   2   25.77    0.69 
  -7   3  -2   25.68    0.74 
   7   3   2   25.65    0.75 
   8  -3   2   11.21    0.50 
   8  -3   2   12.57    0.55 
   8  -3   2   11.18    0.55 
   8  -3   2   10.98    0.48 
   8  -3   2   11.60    0.49 
   8   3   2   10.65    0.48 
   8   3   2   11.62    0.53 
   8   3   2   10.98    0.52 
  -8   3  -2   11.99    0.49 
   9  -3   2    2.78    0.33 
   9  -3   2    2.00    0.31 
   9  -3   2    2.20    0.33 
  -9  -3  -2    2.96    0.38 
   9   3   2    2.57    0.36 
   9   3   2    2.41    0.35 
   9   3   2    2.57    0.32 
  10  -3   2   38.80    1.07 
  10  -3   2   39.10    1.28 
  10  -3   2   38.21    1.22 
  10   3   2   38.40    1.10 
  10   3   2   36.81    1.24 
  10   3   2   39.70    1.21 
  10  -4  -2    3.95    0.53 
  10  -4  -2    3.58    0.47 
  10  -4  -2    4.39    0.44 
  10   4  -2    3.74    0.42 
  10   4  -2    4.25    0.49 
  10   4  -2    4.08    0.55 
  -9  -4   2    7.16    0.32 
   9  -4  -2    6.29    0.55 
   9  -4  -2    7.06    0.47 
   9  -4  -2    7.82    0.52 
  -9  -4   2    5.78    0.43 
   9   4  -2    6.96    0.51 
  -9   4   2    7.03    0.44 
   9   4  -2    7.64    0.48 
   9   4  -2    7.24    0.55 
  -8  -4   2   14.71    0.46 
  -8  -4   2   13.91    0.52 
   8  -4  -2   14.41    0.65 
   8  -4  -2   15.18    0.54 
   8  -4  -2   14.97    0.60 
   8   4  -2   14.51    0.58 
   8   4  -2   15.00    0.63 
  -8   4   2   14.74    0.56 
  -8   4   2   14.59    0.54 
   8   4  -2   15.24    0.56 
   7  -4  -2   11.78    0.53 
  -7  -4   2   12.37    0.40 
   7  -4  -2   11.80    0.42 
  -7  -4   2   11.01    0.42 
   7   4  -2   12.13    0.50 
   7   4  -2   11.24    0.46 
  -7   4   2   12.23    0.47 
  -6  -4   2    2.41    0.20 
  -6  -4   2    2.96    0.19 
   6  -4  -2    2.82    0.23 
  -6  -4   2    2.79    0.19 
   6  -4  -2    2.30    0.24 
   6  -4  -2    2.45    0.21 
   6  -4  -2    2.25    0.26 
   6   4  -2    2.47    0.23 
   6   4  -2    2.96    0.25 
  -6   4   2    2.45    0.23 
   6   4  -2    2.63    0.23 
  -6   4   2    2.51    0.22 
   5  -4  -2    3.79    0.19 
   5  -4  -2    3.34    0.22 
  -5  -4   2    3.77    0.19 
  -5  -4   2    3.32    0.18 
   5  -4  -2    3.42    0.24 
   5   4  -2    3.91    0.23 
  -5   4   2    3.45    0.22 
   5   4  -2    3.71    0.21 
   5   4  -2    3.52    0.20 
  -4  -4   2   11.19    0.33 
   4  -4  -2   11.20    0.34 
  -4  -4   2   10.86    0.31 
   4  -4  -2   10.91    0.35 
   4  -4  -2   10.61    0.38 
  -4  -4   2   10.93    0.30 
   4  -4  -2   11.04    0.30 
   4   4  -2   10.75    0.33 
  -4   4   2   10.33    0.34 
   4   4  -2   10.63    0.31 
  -4   4   2   10.70    0.36 
   4   4  -2   11.16    0.36 
  -3  -4   2   10.51    0.30 
  -3  -4   2    9.92    0.27 
   3  -4  -2   10.06    0.29 
  -3  -4   2    9.86    0.26 
   3  -4  -2   10.05    0.25 
   3  -4  -2    9.81    0.30 
   3   4  -2   10.48    0.29 
   3   4  -2   10.28    0.32 
  -3   4   2   10.18    0.32 
   2  -4  -2  205.44    4.29 
   2  -4  -2  209.90    4.11 
  -2  -4   2  215.51    3.79 
   2  -4  -2  215.07    3.69 
  -2  -4   2  214.30    4.32 
  -2  -4   2  217.39    4.59 
   2   4  -2  215.28    3.74 
  -2   4   2  209.40    4.07 
  -2   4   2  212.53    4.33 
   2   4  -2  217.79    4.60 
  -2   4   2  214.66    4.55 
  -1  -4   2  184.26    3.67 
   1  -4  -2  179.77    3.86 
  -1  -4   2  180.82    3.86 
   1  -4  -2  180.67    3.56 
  -1  -4   2  180.66    3.22 
   1  -4  -2  178.83    3.68 
   1   4  -2  186.75    3.55 
   1   4  -2  181.39    3.23 
  -1   4   2  178.29    3.54 
  -1   4   2  187.29    3.74 
   1   4  -2  181.90    3.92 
  -1   4   2  183.29    3.78 
   0  -4   2   36.03    0.67 
   0  -4  -2   38.03    0.78 
   0  -4  -2   38.01    0.78 
   0  -4  -2   37.28    0.74 
   0  -4   2   37.24    0.73 
   0  -4  -2   36.62    0.79 
   0   4   2   35.46    0.79 
   0   4   2   38.43    0.79 
   0   4  -2   36.50    0.67 
   0   4  -2   37.82    0.82 
   0   4  -2   37.11    0.73 
   0   4   2   37.02    0.76 
   0   4   2   36.87    0.74 
  -1  -4  -2   75.48    1.52 
   1  -4   2   75.12    1.42 
  -1  -4  -2   72.44    1.51 
  -1  -4  -2   76.42    1.43 
   1  -4   2   73.39    1.58 
   1  -4   2   72.77    1.50 
   1  -4   2   74.32    1.51 
   1  -4   2   70.89    1.59 
  -1   4  -2   72.06    1.42 
  -1   4  -2   77.49    1.51 
   1   4   2   74.67    1.43 
   1   4   2   73.17    1.28 
   1   4   2   76.07    1.53 
   1   4   2   71.11    1.51 
   2  -4   2  156.59    3.03 
   2  -4   2  159.86    3.18 
   2  -4   2  156.16    3.15 
   2  -4   2  151.92    3.31 
  -2   4  -2  156.83    3.15 
  -2   4  -2  157.95    2.99 
  -2   4  -2  163.14    3.31 
   2   4   2  163.23    3.24 
   2   4   2  161.10    3.21 
  -2   4  -2  151.58    3.17 
   2   4   2  157.77    2.71 
   2   4   2  155.29    3.18 
   3  -4   2    1.90    0.12 
   3  -4   2    2.15    0.14 
   3  -4   2    2.33    0.15 
  -3  -4  -2    2.15    0.12 
   3  -4   2    1.90    0.12 
   3   4   2    2.18    0.14 
   3   4   2    2.05    0.12 
  -3   4  -2    2.09    0.13 
  -3   4  -2    2.19    0.14 
   3   4   2    1.90    0.12 
   3   4   2    2.02    0.12 
   4  -4   2  202.80    4.22 
   4  -4   2  201.59    4.19 
  -4  -4  -2  208.27    4.15 
   4  -4   2  209.99    3.99 
   4  -4   2  202.51    4.40 
   4   4   2  209.03    4.24 
   4   4   2  205.38    4.32 
   4   4   2  208.21    3.63 
  -4   4  -2  220.53    4.36 
   4   4   2  210.33    4.16 
  -4   4  -2  207.67    4.18 
   5  -4   2    4.82    0.25 
   5  -4   2    5.09    0.27 
   5  -4   2    5.26    0.28 
  -5  -4  -2    5.10    0.23 
   5  -4   2    5.20    0.24 
   5   4   2    5.05    0.25 
   5   4   2    5.40    0.25 
  -5   4  -2    5.70    0.24 
   5   4   2    5.05    0.26 
   5   4   2    5.13    0.23 
  -5   4  -2    5.52    0.26 
  -6  -4  -2  167.03    3.45 
   6  -4   2  167.53    3.53 
   6  -4   2  172.61    3.52 
   6  -4   2  164.84    3.68 
   6  -4   2  170.51    3.34 
  -6   4  -2  177.03    3.58 
   6   4   2  167.81    3.06 
   6   4   2  168.11    3.48 
   6   4   2  169.28    3.55 
  -6   4  -2  164.24    3.48 
   6   4   2  164.71    3.61 
   7  -4   2    3.64    0.32 
   7  -4   2    3.44    0.28 
   7  -4   2    3.61    0.28 
  -7  -4  -2    3.44    0.26 
   7  -4   2    2.93    0.26 
   7  -4   2    3.05    0.33 
  -7   4  -2    3.46    0.22 
   7   4   2    3.17    0.30 
  -7   4  -2    3.70    0.28 
   7   4   2    4.23    0.31 
   7   4   2    3.99    0.30 
   8  -4   2   36.21    1.03 
   8  -4   2   34.75    1.05 
   8  -4   2   35.98    0.95 
   8  -4   2   35.92    0.99 
   8  -4   2   34.24    0.89 
  -8   4  -2   34.90    0.97 
   8   4   2   35.22    0.99 
   8   4   2   34.18    0.91 
   8   4   2   34.26    1.00 
   9  -4   2   12.65    0.56 
   9  -4   2   11.68    0.60 
  -9  -4  -2   11.04    0.54 
   9  -4   2   10.65    0.63 
   9   4   2   11.10    0.62 
   9   4   2   11.63    0.57 
   9   4   2   11.89    0.60 
  10  -4   2   10.39    0.72 
  10  -4   2   10.60    0.62 
  10  -4   2   10.31    0.67 
  10   4   2    9.59    0.65 
  10   4   2   10.38    0.66 
  10   4   2    8.93    0.71 
  10  -5  -2    1.06    0.36 
  10  -5  -2    0.77    0.34 
  10  -5  -2    0.85    0.30 
  10   5  -2    0.82    0.32 
  10   5  -2    0.90    0.34 
  10   5  -2    0.64    0.33 
   9  -5  -2   24.97    0.76 
  -9  -5   2   23.55    0.77 
   9  -5  -2   23.51    0.93 
   9  -5  -2   25.58    0.88 
   9   5  -2   23.89    0.90 
  -9   5   2   24.91    0.80 
   9   5  -2   23.82    0.78 
   9   5  -2   25.80    0.86 
   8  -5  -2    0.00    0.18 
  -8  -5   2    0.05    0.12 
  -8  -5   2   -0.05    0.15 
   8  -5  -2    0.64    0.23 
   8  -5  -2    0.43    0.18 
   8   5  -2    0.33    0.21 
  -8   5   2   -0.08    0.17 
   8   5  -2    0.38    0.20 
   8   5  -2    0.28    0.20 
   7  -5  -2    3.99    0.33 
   7  -5  -2    3.72    0.29 
  -7  -5   2    3.24    0.25 
  -7  -5   2    3.79    0.23 
   7   5  -2    3.48    0.32 
   7   5  -2    3.42    0.29 
  -7   5   2    3.64    0.31 
   7   5  -2    3.56    0.29 
  -6  -5   2    4.48    0.24 
   6  -5  -2    5.34    0.26 
   6  -5  -2    4.37    0.29 
   6  -5  -2    4.84    0.27 
   6  -5  -2    4.42    0.31 
  -6  -5   2    4.97    0.23 
   6   5  -2    4.50    0.28 
  -6   5   2    4.88    0.29 
  -6   5   2    4.51    0.28 
   6   5  -2    4.51    0.27 
   6   5  -2    4.67    0.30 
   5  -5  -2    0.38    0.10 
  -5  -5   2    0.40    0.09 
   5  -5  -2    0.16    0.09 
  -5  -5   2    0.27    0.08 
   5  -5  -2    0.07    0.10 
  -5  -5   2    0.19    0.08 
   5  -5  -2    0.29    0.10 
  -5   5   2    0.20    0.09 
   5   5  -2    0.15    0.09 
   5   5  -2    0.24    0.09 
  -5   5   2    0.25    0.11 
   5   5  -2    0.13    0.10 
   4  -5  -2   19.40    0.53 
  -4  -5   2   19.53    0.45 
   4  -5  -2   18.93    0.51 
   4  -5  -2   20.05    0.45 
   4  -5  -2   19.86    0.57 
  -4  -5   2   19.84    0.49 
  -4  -5   2   20.56    0.51 
  -4   5   2   20.24    0.56 
   4   5  -2   19.93    0.51 
   4   5  -2   20.34    0.55 
  -3  -5   2   22.35    0.51 
  -3  -5   2   23.18    0.55 
   3  -5  -2   21.71    0.55 
   3  -5  -2   22.38    0.59 
  -3  -5   2   22.92    0.48 
   3  -5  -2   22.38    0.46 
   3  -5  -2   21.52    0.52 
  -3   5   2   22.03    0.54 
  -3   5   2   22.37    0.59 
   3   5  -2   22.66    0.52 
   3   5  -2   22.05    0.57 
   3   5  -2   21.99    0.48 
   2  -5  -2   25.13    0.56 
  -2  -5   2   24.38    0.50 
   2  -5  -2   24.57    0.57 
  -2  -5   2   25.31    0.59 
  -2  -5   2   25.84    0.55 
   2  -5  -2   24.56    0.61 
  -2   5   2   25.23    0.56 
   2   5  -2   25.58    0.51 
   2   5  -2   26.34    0.61 
  -2   5   2   25.03    0.62 
  -2   5   2   25.09    0.57 
  -1  -5   2  371.99    7.88 
  -1  -5   2  368.12    6.56 
   1  -5  -2  367.44    7.50 
   1  -5  -2  376.98    7.27 
   1  -5  -2  374.18    7.99 
  -1   5   2  386.69    8.01 
  -1   5   2  363.58    7.24 
  -1   5   2  379.23    7.55 
   1   5  -2  369.95    7.89 
   1   5  -2  379.08    7.19 
   0  -5  -2   12.40    0.31 
   0  -5  -2   12.87    0.28 
   0  -5   2   12.71    0.29 
   0  -5  -2   12.46    0.29 
   0  -5   2   13.02    0.27 
   0  -5  -2   12.14    0.29 
   0  -5  -2   12.64    0.23 
   0  -5   2   12.37    0.33 
   0  -5   2   12.15    0.34 
   0   5  -2   12.07    0.27 
   0   5   2   12.62    0.29 
   0   5   2   12.61    0.28 
   0   5  -2   11.98    0.28 
   0   5   2   12.81    0.32 
   0   5   2   12.81    0.23 
   0   5  -2   12.82    0.33 
   0   5   2   12.51    0.30 
  -1  -5  -2  130.55    2.40 
   1  -5   2  125.67    2.53 
   1  -5   2  123.71    2.39 
  -1  -5  -2  129.01    2.55 
   1  -5   2  125.00    2.65 
   1  -5   2  124.68    2.66 
   1  -5   2  121.72    2.51 
  -1  -5  -2  122.78    2.18 
   1   5   2  127.05    2.40 
  -1   5  -2  124.88    2.53 
  -1   5  -2  128.27    2.39 
  -1   5  -2  126.41    2.51 
   1   5   2  125.42    2.19 
   1   5   2  128.07    2.55 
   1   5   2  123.91    2.52 
   2  -5   2   88.45    1.95 
   2  -5   2   88.13    1.85 
  -2  -5  -2   88.74    1.57 
   2  -5   2   87.66    1.84 
   2  -5   2   90.69    1.75 
   2   5   2   90.20    1.76 
  -2   5  -2   88.33    1.85 
   2   5   2   91.60    1.80 
  -2   5  -2   91.33    1.85 
  -2   5  -2   91.70    1.75 
  -2   5  -2   92.41    1.94 
   2   5   2   89.80    1.58 
   2   5   2   91.52    1.86 
   2   5   2   87.68    1.85 
   3  -5   2  134.20    2.78 
   3  -5   2  136.07    2.79 
  -3  -5  -2  137.88    2.73 
   3  -5   2  135.79    2.64 
   3  -5   2  132.33    2.92 
   3   5   2  135.32    2.80 
  -3   5  -2  141.07    2.90 
   3   5   2  137.02    2.73 
   3   5   2  140.68    2.80 
   3   5   2  133.31    2.39 
   4  -5   2   18.14    0.49 
  -4  -5  -2   18.38    0.47 
   4  -5   2   18.02    0.47 
   4  -5   2   17.66    0.51 
   4  -5   2   18.29    0.54 
   4   5   2   18.63    0.48 
   4   5   2   17.59    0.45 
   4   5   2   16.95    0.44 
  -4   5  -2   17.80    0.50 
   4   5   2   17.83    0.48 
  -4   5  -2   18.54    0.50 
  -5  -5  -2  145.44    2.94 
   5  -5   2  141.66    3.01 
   5  -5   2  142.68    2.86 
   5  -5   2  142.13    3.15 
   5  -5   2  143.00    3.00 
   5   5   2  140.86    3.05 
   5   5   2  143.24    2.95 
   5   5   2  144.56    2.60 
  -5   5  -2  141.23    2.98 
  -5   5  -2  153.19    3.08 
   6  -5   2   13.83    0.50 
   6  -5   2   13.53    0.45 
   6  -5   2   13.37    0.46 
  -6  -5  -2   14.16    0.44 
   6  -5   2   12.98    0.51 
  -6   5  -2   14.36    0.44 
   6   5   2   13.92    0.47 
  -6   5  -2   13.40    0.47 
   6   5   2   13.83    0.46 
   6   5   2   13.46    0.46 
   6   5   2   14.00    0.49 
   7  -5   2   81.88    1.88 
   7  -5   2   82.22    1.85 
   7  -5   2   80.04    1.76 
  -7  -5  -2   81.06    1.79 
   7  -5   2   79.03    1.95 
   7  -5   2   81.20    1.62 
   7   5   2   82.05    1.65 
  -7   5  -2   84.16    1.82 
   7   5   2   79.69    1.88 
   7   5   2   80.88    1.83 
  -8  -5  -2    0.79    0.19 
   8  -5   2    0.64    0.22 
   8  -5   2    0.77    0.20 
   8  -5   2    0.81    0.24 
   8  -5   2    0.99    0.22 
   8  -5   2    1.00    0.20 
   8   5   2    0.36    0.17 
   8   5   2    0.37    0.18 
   8   5   2    0.46    0.22 
   8   5   2    0.92    0.22 
  -8   5  -2    0.91    0.20 
   9  -5   2   42.72    1.21 
   9  -5   2   41.55    1.05 
   9  -5   2   40.36    1.24 
  -9  -5  -2   40.40    1.10 
   9   5   2   40.80    1.17 
   9   5   2   40.26    1.07 
   9   5   2   39.18    1.19 
  10  -5   2    0.56    0.34 
  10  -5   2    0.37    0.29 
  10  -5   2    0.39    0.30 
  10   5   2   -0.19    0.29 
  10   5   2   -0.39    0.30 
  10   5   2    0.14    0.35 
  10   5   2    0.89    0.36 
  10  -6  -2   31.88    0.97 
  10  -6  -2   31.40    1.18 
  10  -6  -2   31.46    1.10 
  10   6  -2   31.94    1.01 
  10   6  -2   32.01    1.08 
  10   6  -2   31.40    1.16 
   9  -6  -2   35.35    0.94 
  -9  -6   2   34.22    0.98 
   9  -6  -2   34.83    1.09 
   9  -6  -2   34.41    1.16 
   9   6  -2   36.00    1.13 
   9   6  -2   35.91    1.06 
  -9   6   2   35.11    1.03 
   9   6  -2   36.44    1.00 
  -8  -6   2    1.41    0.19 
   8  -6  -2    2.32    0.32 
  -8  -6   2    1.65    0.22 
   8  -6  -2    1.79    0.25 
   8  -6  -2    2.22    0.25 
  -8   6   2    1.60    0.25 
   8   6  -2    1.58    0.27 
   8   6  -2    1.64    0.26 
  -7  -6   2  155.93    3.22 
   7  -6  -2  139.74    3.54 
   7  -6  -2  158.26    2.86 
  -7  -6   2  161.22    3.31 
   7  -6  -2  150.86    3.31 
   7   6  -2  154.93    3.46 
   7   6  -2  156.55    3.27 
   7   6  -2  158.12    2.90 
  -7   6   2  166.47    3.45 
   6  -6  -2    3.25    0.26 
  -6  -6   2    2.89    0.22 
   6  -6  -2    3.04    0.23 
   6  -6  -2    2.61    0.28 
   6  -6  -2    3.36    0.25 
  -6  -6   2    3.11    0.19 
   6   6  -2    2.80    0.26 
   6   6  -2    2.96    0.24 
  -6   6   2    3.05    0.24 
  -6   6   2    3.17    0.26 
   6   6  -2    3.33    0.25 
  -5  -6   2  122.82    2.24 
   5  -6  -2  126.93    2.25 
   5  -6  -2  123.42    2.50 
  -5  -6   2  130.38    2.66 
   5  -6  -2  122.46    2.76 
  -5  -6   2  122.14    2.54 
   5  -6  -2  122.96    2.61 
   5   6  -2  124.11    2.72 
  -5   6   2  122.00    2.59 
   5   6  -2  123.53    2.57 
  -5   6   2  128.76    2.77 
   5   6  -2  122.46    2.27 
   4  -6  -2   33.79    0.67 
  -4  -6   2   32.50    0.68 
   4  -6  -2   32.04    0.76 
   4  -6  -2   32.64    0.85 
  -4  -6   2   33.62    0.78 
  -4  -6   2   32.42    0.74 
  -4   6   2   32.61    0.78 
   4   6  -2   32.05    0.70 
   4   6  -2   32.54    0.76 
  -4   6   2   34.02    0.85 
   4   6  -2   32.80    0.82 
   3  -6  -2  102.63    2.08 
   3  -6  -2  106.08    2.31 
  -3  -6   2  109.37    2.25 
  -3  -6   2  106.59    2.12 
   3  -6  -2  104.21    2.17 
  -3  -6   2  106.22    1.88 
  -3   6   2  101.96    2.16 
  -3   6   2  103.89    2.08 
   3   6  -2  105.81    1.89 
  -3   6   2  106.68    2.31 
   3   6  -2  108.08    2.28 
   3   6  -2  106.97    2.14 
   2  -6  -2   37.75    0.79 
  -2  -6   2   37.70    0.78 
  -2  -6   2   37.52    0.84 
   2  -6  -2   36.16    0.87 
  -2  -6   2   37.97    0.71 
   2  -6  -2   36.68    0.81 
  -2   6   2   36.82    0.88 
   2   6  -2   37.26    0.86 
   2   6  -2   37.58    0.72 
  -2   6   2   35.95    0.81 
  -1  -6   2  236.01    4.15 
   1  -6  -2  244.48    5.07 
   1  -6  -2  238.71    4.75 
   1  -6  -2  241.91    4.94 
  -1  -6   2  243.28    5.15 
  -1  -6   2  247.02    4.63 
  -1   6   2  238.05    4.71 
  -1   6   2  246.95    5.19 
   1   6  -2  246.89    4.79 
   1   6  -2  240.09    5.05 
   1   6  -2  235.76    4.19 
  -1   6   2  246.29    4.90 
   0  -6  -2  282.55    5.85 
   0  -6  -2  285.16    5.81 
   0  -6   2  271.86    4.78 
   0  -6  -2  278.54    5.39 
   0  -6   2  279.78    5.41 
   0  -6   2  268.62    5.88 
   0  -6  -2  279.05    5.75 
   0  -6   2  271.14    5.92 
   0  -6  -2  279.36    4.73 
   0   6   2  279.67    5.56 
   0   6   2  274.99    5.85 
   0   6  -2  275.41    5.84 
   0   6   2  277.45    5.83 
   0   6  -2  273.75    5.38 
   0   6   2  280.81    5.53 
   0   6  -2  270.70    4.81 
   0   6   2  276.89    5.36 
   0   6   2  280.48    4.73 
  -1  -6  -2    6.86    0.20 
   1  -6   2    6.69    0.22 
  -1  -6  -2    6.43    0.15 
   1  -6   2    6.48    0.20 
  -1  -6  -2    6.88    0.20 
   1  -6   2    6.79    0.19 
   1  -6   2    6.81    0.19 
   1   6   2    6.78    0.19 
  -1   6  -2    7.17    0.21 
   1   6   2    6.82    0.20 
  -1   6  -2    6.66    0.19 
  -1   6  -2    6.76    0.19 
   1   6   2    6.80    0.16 
   1   6   2    7.06    0.21 
   1   6   2    6.94    0.16 
  -1   6  -2    6.87    0.24 
   2  -6   2  143.76    3.13 
   2  -6   2  147.85    2.82 
   2  -6   2  146.51    2.97 
  -2  -6  -2  151.09    2.98 
   2  -6   2  143.14    2.95 
  -2  -6  -2  146.72    2.53 
  -2   6  -2  143.21    2.96 
  -2   6  -2  150.29    3.12 
  -2   6  -2  145.37    2.96 
  -2   6  -2  148.00    2.81 
   2   6   2  145.22    2.54 
   2   6   2  148.74    2.83 
   2   6   2  149.91    2.96 
   2   6   2  144.17    2.97 
   2   6   2  151.43    2.99 
   3  -6   2    8.91    0.30 
   3  -6   2    8.79    0.28 
  -3  -6  -2    8.64    0.25 
   3  -6   2    8.83    0.32 
   3  -6   2    8.57    0.27 
  -3   6  -2    8.39    0.26 
   3   6   2    9.08    0.26 
   3   6   2    8.62    0.25 
   3   6   2    9.21    0.28 
  -3   6  -2    9.12    0.31 
  -3   6  -2    9.07    0.30 
   4  -6   2   69.59    1.43 
   4  -6   2   63.33    1.43 
  -4  -6  -2   64.96    1.38 
   4  -6   2   63.15    1.51 
   4  -6   2   64.64    1.35 
  -4   6  -2   67.21    1.48 
   4   6   2   64.72    1.39 
   4   6   2   63.53    1.24 
   4   6   2   65.96    1.41 
  -4   6  -2   65.05    1.43 
   4   6   2   63.95    1.40 
   5  -6   2    0.74    0.12 
   5  -6   2    0.69    0.12 
   5  -6   2    0.67    0.14 
  -5  -6  -2    0.90    0.12 
   5   6   2    0.66    0.11 
  -5   6  -2    0.75    0.13 
   5   6   2    0.83    0.13 
   5   6   2    0.87    0.12 
  -5   6  -2    0.71    0.12 
   5   6   2    0.76    0.14 
   6  -6   2  106.31    2.48 
   6  -6   2  108.60    2.35 
   6  -6   2  106.38    2.37 
   6  -6   2  110.52    2.24 
   6   6   2  108.44    2.06 
   6   6   2  109.85    2.38 
  -6   6  -2  106.32    2.34 
  -6   6  -2  114.61    2.40 
   6   6   2  106.03    2.39 
   6   6   2  111.32    2.33 
   6   6   2  109.83    2.32 
  -7  -6  -2    0.30    0.13 
   7  -6   2    0.43    0.15 
   7  -6   2    0.73    0.16 
   7  -6   2    0.32    0.14 
   7  -6   2    0.45    0.18 
   7  -6   2    0.41    0.16 
   7   6   2    0.14    0.15 
   7   6   2    0.38    0.16 
   7   6   2    0.47    0.15 
   7   6   2    0.47    0.16 
  -7   6  -2    0.12    0.13 
   8  -6   2   28.96    0.95 
   8  -6   2   29.07    0.86 
   8  -6   2   30.68    0.85 
   8  -6   2   29.59    0.79 
  -8  -6  -2   27.57    0.81 
   8  -6   2   29.69    0.91 
   8   6   2   29.25    0.82 
   8   6   2   28.23    0.82 
   8   6   2   29.62    0.89 
   8   6   2   27.83    0.86 
   8   6   2   28.30    0.88 
  -8   6  -2   27.93    0.85 
   9  -6   2   16.09    0.62 
   9  -6   2   16.36    0.75 
  -9  -6  -2   16.32    0.63 
   9  -6   2   17.24    0.72 
   9   6   2   16.57    0.64 
   9   6   2   17.22    0.70 
   9   6   2   15.84    0.67 
   9   6   2   16.02    0.72 
  10  -6   2   24.57    0.96 
  10  -6   2   24.48    0.85 
  10  -6   2   24.35    1.02 
  10   6   2   23.21    0.98 
  10   6   2   24.01    0.90 
  10   6   2   24.63    0.95 
  10  -7  -2   18.98    0.94 
  10  -7  -2   20.03    0.79 
  10  -7  -2   18.83    0.85 
  10   7  -2   19.67    0.81 
  10   7  -2   19.32    0.92 
  10   7  -2   21.06    0.88 
   9  -7  -2    0.45    0.25 
  -9  -7   2   -0.11    0.20 
   9  -7  -2    0.81    0.29 
   9  -7  -2    0.65    0.26 
   9  -7  -2    0.46    0.24 
   9   7  -2    0.57    0.26 
   9   7  -2    0.41    0.25 
   9   7  -2    0.25    0.27 
   8  -7  -2   82.95    2.12 
  -8  -7   2   84.35    1.89 
   8  -7  -2   87.73    1.74 
   8  -7  -2   83.70    2.01 
   8   7  -2   86.47    1.77 
   8   7  -2   84.32    2.00 
  -8   7   2   88.77    2.04 
   8   7  -2   85.46    2.08 
   7  -7  -2    0.24    0.17 
  -7  -7   2    0.13    0.10 
   7  -7  -2    0.24    0.15 
  -7  -7   2    0.17    0.12 
   7  -7  -2    0.24    0.17 
   7   7  -2   -0.09    0.16 
  -7   7   2    0.14    0.15 
   7   7  -2    0.41    0.16 
   7   7  -2    0.00    0.14 
   6  -7  -2  161.66    3.72 
   6  -7  -2  176.13    3.04 
  -6  -7   2  166.34    3.43 
  -6  -7   2  176.36    3.56 
   6  -7  -2  164.40    3.52 
  -6  -7   2  168.00    3.02 
   6  -7  -2  165.46    3.36 
   6   7  -2  167.97    3.68 
  -6   7   2  177.29    3.70 
  -6   7   2  166.11    3.49 
   6   7  -2  167.73    3.47 
   6   7  -2  168.91    3.07 
   5  -7  -2    2.03    0.23 
   5  -7  -2    1.80    0.19 
  -5  -7   2    2.07    0.16 
   5  -7  -2    1.68    0.17 
  -5  -7   2    1.96    0.15 
  -5  -7   2    1.92    0.15 
   5  -7  -2    2.10    0.20 
   5   7  -2    1.84    0.21 
  -5   7   2    1.67    0.18 
  -5   7   2    1.97    0.21 
   5   7  -2    2.00    0.19 
   5   7  -2    1.76    0.17 
   4  -7  -2   88.32    2.04 
   4  -7  -2   87.74    1.92 
   4  -7  -2   89.50    1.84 
  -4  -7   2   89.74    1.86 
  -4  -7   2   94.63    1.96 
  -4  -7   2   90.37    1.66 
  -4   7   2   95.31    2.05 
   4   7  -2   89.88    1.68 
  -4   7   2   90.81    1.91 
   4   7  -2   91.51    2.01 
   4   7  -2   91.42    1.88 
   3  -7  -2    0.66    0.11 
   3  -7  -2    0.99    0.12 
  -3  -7   2    1.01    0.08 
   3  -7  -2    0.80    0.10 
  -3  -7   2    0.74    0.09 
  -3  -7   2    0.99    0.10 
   3   7  -2    0.92    0.10 
  -3   7   2    0.89    0.10 
  -3   7   2    0.72    0.11 
   3   7  -2    0.65    0.09 
  -3   7   2    0.63    0.09 
  -2  -7   2  505.80   10.50 
   2  -7  -2  499.77    9.64 
  -2  -7   2  470.94    8.50 
  -2  -7   2  508.09    9.80 
   2  -7  -2  475.11    9.86 
   2  -7  -2  489.20   10.38 
   2   7  -2  499.61    9.49 
  -2   7   2  496.03    9.63 
  -2   7   2  483.93    9.92 
   2   7  -2  492.79    8.66 
   2   7  -2  500.75   10.56 
  -2   7   2  501.13   10.58 
  -1  -7   2  103.80    2.29 
   1  -7  -2  107.31    2.07 
  -1  -7   2  104.65    1.87 
  -1  -7   2  110.63    2.08 
  -1  -7   2  109.25    2.27 
   1  -7  -2  105.81    2.27 
   1  -7  -2  108.01    2.14 
   1   7  -2  106.59    2.08 
  -1   7   2  106.18    2.14 
  -1   7   2  105.80    2.07 
  -1   7   2  107.40    2.29 
   1   7  -2  109.52    2.28 
   1   7  -2  106.49    1.87 
   0  -7   2   20.01    0.45 
   0  -7  -2   20.44    0.45 
   0  -7  -2   19.33    0.47 
   0  -7  -2   19.98    0.36 
   0  -7   2   19.34    0.44 
   0  -7  -2   19.84    0.45 
   0  -7  -2   20.40    0.45 
   0   7   2   19.07    0.36 
   0   7   2   19.93    0.42 
   0   7  -2   19.84    0.50 
   0   7  -2   19.63    0.41 
   0   7   2   20.12    0.43 
   0   7   2   19.36    0.48 
   0   7  -2   19.17    0.44 
   0   7   2   20.25    0.47 
   0   7   2   20.38    0.45 
  -1  -7  -2    8.50    0.24 
  -1  -7  -2    8.77    0.24 
   1  -7   2    8.55    0.29 
  -1  -7  -2    8.53    0.19 
   1  -7   2    8.67    0.24 
   1  -7   2    8.65    0.22 
   1  -7   2    8.62    0.27 
   1  -7   2    8.34    0.23 
   1   7   2    8.49    0.22 
  -1   7  -2    8.56    0.23 
   1   7   2    8.30    0.23 
   1   7   2    8.87    0.20 
  -1   7  -2    8.40    0.23 
   1   7   2    8.47    0.25 
   1   7   2    8.55    0.24 
   1   7   2    8.81    0.21 
  -1   7  -2    8.61    0.24 
   2  -7   2   34.36    0.87 
   2  -7   2   35.46    0.76 
   2  -7   2   35.36    0.80 
  -2  -7  -2   36.04    0.79 
   2  -7   2   36.35    0.79 
  -2  -7  -2   35.18    0.67 
   2  -7   2   35.58    0.84 
  -2   7  -2   35.44    0.80 
  -2   7  -2   36.17    0.76 
   2   7   2   35.16    0.77 
   2   7   2   36.41    0.80 
   2   7   2   35.16    0.79 
  -2   7  -2   36.64    0.86 
   2   7   2   34.66    0.68 
  -2   7  -2   34.82    0.78 
   2   7   2   36.29    0.75 
  -3  -7  -2    0.49    0.07 
  -3  -7  -2    0.45    0.07 
   3  -7   2    0.60    0.11 
   3  -7   2    0.46    0.08 
   3  -7   2    0.63    0.10 
   3  -7   2    0.55    0.08 
   3   7   2    0.42    0.05 
   3   7   2    0.66    0.09 
   3   7   2    0.31    0.07 
   3   7   2    0.49    0.07 
  -3   7  -2    0.90    0.11 
  -3   7  -2    0.59    0.10 
   3   7   2    0.53    0.09 
   4  -7   2    7.05    0.26 
   4  -7   2    6.70    0.31 
   4  -7   2    6.82    0.26 
  -4  -7  -2    6.56    0.23 
   4  -7   2    6.89    0.29 
   4   7   2    6.49    0.22 
   4   7   2    6.94    0.25 
  -4   7  -2    7.16    0.29 
  -4   7  -2    7.05    0.28 
   4   7   2    7.00    0.25 
   4   7   2    6.73    0.25 
  -5  -7  -2    2.34    0.17 
   5  -7   2    1.99    0.21 
   5  -7   2    2.10    0.18 
   5  -7   2    1.81    0.17 
   5  -7   2    2.30    0.23 
   5   7   2    2.17    0.18 
   5   7   2    2.02    0.20 
  -5   7  -2    2.53    0.21 
   5   7   2    2.53    0.18 
  -5   7  -2    2.19    0.19 
   5   7   2    1.88    0.17 
   6  -7   2    3.25    0.29 
   6  -7   2    2.93    0.24 
   6  -7   2    3.52    0.24 
   6  -7   2    3.06    0.26 
  -6   7  -2    3.09    0.26 
   6   7   2    2.72    0.25 
  -6   7  -2    3.35    0.25 
   6   7   2    3.37    0.23 
   6   7   2    3.21    0.24 
   6   7   2    3.42    0.24 
   6   7   2    3.04    0.24 
   7  -7   2    1.24    0.23 
  -7  -7  -2    1.23    0.18 
   7  -7   2    1.18    0.18 
   7  -7   2    1.38    0.21 
   7   7   2    0.98    0.20 
   7   7   2    1.18    0.18 
   7   7   2    0.98    0.19 
   7   7   2    1.51    0.23 
   7   7   2    0.97    0.21 
  -7   7  -2    0.98    0.18 
   8  -7   2   18.54    0.60 
   8  -7   2   18.78    0.65 
  -8  -7  -2   18.02    0.61 
   8  -7   2   18.16    0.64 
   8  -7   2   18.17    0.73 
   8  -7   2   19.01    0.70 
   8   7   2   18.67    0.70 
   8   7   2   17.74    0.67 
  -8   7  -2   17.86    0.69 
   8   7   2   18.47    0.65 
   8   7   2   18.27    0.62 
   9  -7   2    2.81    0.37 
   9  -7   2    3.32    0.39 
  -9  -7  -2    2.60    0.31 
   9  -7   2    2.63    0.32 
   9   7   2    2.26    0.32 
   9   7   2    3.33    0.42 
   9   7   2    2.93    0.36 
   9   7   2    2.38    0.35 
  10  -7   2   29.73    1.06 
  10  -7   2   30.68    0.94 
  10  -7   2   29.05    1.12 
  10   7   2   28.45    1.03 
  10   7   2   27.61    1.07 
  10   7   2   29.48    1.01 
  10  -8  -2    1.33    0.34 
  10  -8  -2    0.66    0.33 
  10  -8  -2    1.31    0.41 
  10   8  -2    0.98    0.34 
  10   8  -2    1.43    0.41 
  10   8  -2    1.45    0.42 
   9  -8  -2   47.00    1.32 
   9  -8  -2   47.78    1.25 
   9  -8  -2   45.92    1.12 
  -9  -8   2   43.34    1.17 
   9  -8  -2   44.90    1.39 
   9   8  -2   46.46    1.19 
   9   8  -2   48.23    1.28 
   9   8  -2   46.34    1.36 
  -8  -8   2    0.26    0.17 
   8  -8  -2    0.39    0.20 
   8  -8  -2    0.23    0.20 
   8  -8  -2    0.01    0.17 
   8  -8  -2    0.08    0.18 
   8   8  -2    0.43    0.20 
  -8   8   2    0.47    0.21 
   8   8  -2    0.27    0.19 
   8   8  -2    0.12    0.21 
  -8   8   2   -0.35    0.16 
  -7  -8   2   80.24    1.70 
   7  -8  -2   74.51    1.92 
  -7  -8   2   77.28    1.71 
   7  -8  -2   79.44    1.56 
   7  -8  -2   77.48    1.82 
   7   8  -2   77.61    1.60 
  -7   8   2   80.82    1.88 
   7   8  -2   78.44    1.88 
   7   8  -2   78.65    1.76 
   6  -8  -2    0.39    0.13 
   6  -8  -2    0.19    0.14 
  -6  -8   2    0.56    0.12 
   6  -8  -2    0.35    0.13 
  -6  -8   2    0.64    0.11 
   6  -8  -2    0.24    0.12 
   6   8  -2    0.56    0.14 
   6   8  -2    0.19    0.14 
  -6   8   2    0.26    0.14 
  -6   8   2    0.26    0.12 
   6   8  -2    0.51    0.13 
   5  -8  -2  148.74    3.15 
  -5  -8   2  159.88    3.21 
   5  -8  -2  148.67    3.34 
  -5  -8   2  146.85    3.06 
   5  -8  -2  153.87    2.70 
  -5  -8   2  151.46    2.71 
   5  -8  -2  151.45    3.02 
   5   8  -2  150.43    3.09 
  -5   8   2  149.72    3.13 
   5   8  -2  151.92    2.75 
   5   8  -2  150.21    3.29 
  -5   8   2  158.73    3.33 
  -4  -8   2   18.26    0.44 
  -4  -8   2   17.65    0.44 
   4  -8  -2   17.79    0.56 
   4  -8  -2   17.85    0.51 
  -4  -8   2   18.61    0.47 
   4  -8  -2   17.40    0.49 
   4   8  -2   17.37    0.46 
  -4   8   2   19.01    0.56 
   4   8  -2   17.86    0.46 
   4   8  -2   18.23    0.52 
  -4   8   2   17.98    0.50 
   3  -8  -2  169.26    3.30 
  -3  -8   2  170.02    2.97 
   3  -8  -2  169.53    3.43 
  -3  -8   2  172.21    3.37 
   3  -8  -2  167.82    3.64 
  -3  -8   2  177.45    3.58 
   3   8  -2  168.25    2.98 
  -3   8   2  174.92    3.65 
   3   8  -2  165.67    3.32 
   3   8  -2  173.26    3.61 
  -3   8   2  170.54    3.30 
  -3   8   2  165.98    3.42 
  -2  -8   2    0.38    0.07 
  -2  -8   2    0.52    0.08 
   2  -8  -2    0.35    0.06 
  -2  -8   2    0.39    0.06 
   2   8  -2    0.45    0.07 
  -2   8   2    0.42    0.08 
   2   8  -2    0.33    0.07 
  -2   8   2    0.47    0.08 
  -2   8   2    0.40    0.07 
   2   8  -2    0.55    0.08 
   1  -8  -2  108.91    2.16 
  -1  -8   2  112.62    2.36 
  -1  -8   2  113.31    2.16 
  -1  -8   2  109.40    1.94 
   1  -8  -2  110.64    2.22 
   1  -8  -2  111.55    2.35 
   1  -8  -2  111.51    1.89 
   1  -8  -2  113.50    2.36 
  -1  -8   2  110.52    2.38 
  -1   8   2  109.28    2.16 
   1   8  -2  112.47    2.16 
  -1   8   2  110.45    2.22 
   1   8  -2  109.99    1.95 
   1   8  -2  110.59    2.37 
  -1   8   2  111.19    2.38 
   0  -8  -2    0.82    0.05 
   0  -8   2    0.81    0.11 
   0  -8   2    0.78    0.07 
   0  -8   2    0.75    0.08 
   0  -8   2    0.88    0.09 
   0  -8  -2    0.88    0.07 
   0  -8  -2    0.90    0.08 
   0  -8   2    0.87    0.08 
   0  -8  -2    0.93    0.09 
   0   8   2    0.91    0.08 
   0   8   2    0.88    0.09 
   0   8   2    0.90    0.05 
   0   8   2    0.92    0.05 
   0   8  -2    0.92    0.08 
   0   8  -2    0.91    0.10 
   0   8  -2    0.84    0.08 
   0   8   2    0.74    0.08 
   0   8   2    0.95    0.06 
  -1  -8  -2   16.02    0.39 
   1  -8   2   15.04    0.39 
   1  -8   2   15.23    0.35 
   1  -8   2   15.87    0.43 
  -1  -8  -2   15.79    0.38 
  -1  -8  -2   15.55    0.31 
   1  -8   2   15.33    0.38 
   1   8   2   15.43    0.40 
   1   8   2   15.00    0.39 
   1   8   2   15.49    0.32 
   1   8   2   15.93    0.37 
   1   8   2   15.38    0.37 
  -1   8  -2   16.86    0.37 
   1   8   2   15.48    0.38 
  -1   8  -2   15.77    0.38 
  -1   8  -2   15.61    0.45 
   2  -8   2   58.05    1.30 
   2  -8   2   56.18    1.23 
   2  -8   2   57.01    1.21 
   2  -8   2   57.23    1.33 
  -2  -8  -2   57.26    1.03 
   2  -8   2   57.32    1.17 
  -2  -8  -2   57.77    1.21 
   2   8   2   58.26    1.23 
  -2   8  -2   56.47    1.23 
   2   8   2   58.00    1.16 
   2   8   2   55.95    1.22 
  -2   8  -2   57.70    1.17 
   2   8   2   57.08    1.18 
   2   8   2   57.41    1.22 
  -2   8  -2   58.16    1.32 
  -2   8  -2   56.11    1.21 
   2   8   2   56.61    1.04 
  -3  -8  -2   31.13    0.62 
   3  -8   2   31.05    0.71 
   3  -8   2   30.45    0.81 
   3  -8   2   31.42    0.72 
   3  -8   2   30.55    0.75 
   3   8   2   31.04    0.72 
  -3   8  -2   30.44    0.70 
  -3   8  -2   30.92    0.75 
   3   8   2   30.71    0.68 
   3   8   2   30.14    0.72 
   3   8   2   30.97    0.64 
   3   8   2   30.95    0.68 
   3   8   2   30.55    0.69 
  -3   8  -2   32.62    0.80 
   4  -8   2   38.54    0.89 
  -4  -8  -2   40.51    0.88 
   4  -8   2   40.61    0.96 
   4  -8   2   39.28    0.92 
   4  -8   2   38.40    1.01 
   4   8   2   38.95    0.89 
  -4   8  -2   41.54    0.99 
  -4   8  -2   39.45    0.95 
   4   8   2   39.43    0.83 
   4   8   2   41.50    0.92 
   4   8   2   39.43    0.88 
   5  -8   2    0.25    0.11 
  -5  -8  -2    0.31    0.09 
   5  -8   2    0.20    0.10 
   5  -8   2    0.25    0.10 
   5  -8   2    0.24    0.13 
   5   8   2    0.21    0.10 
   5   8   2    0.21    0.10 
   5   8   2    0.14    0.09 
  -5   8  -2    0.27    0.10 
  -5   8  -2    0.20    0.10 
   5   8   2    0.23    0.12 
   6  -8   2   15.87    0.60 
   6  -8   2   16.37    0.52 
  -6  -8  -2   16.63    0.48 
   6  -8   2   16.31    0.56 
   6  -8   2   16.04    0.51 
  -6   8  -2   15.80    0.55 
   6   8   2   17.42    0.51 
   6   8   2   16.25    0.51 
   6   8   2   16.96    0.52 
   6   8   2   16.47    0.50 
  -7  -8  -2   22.13    0.63 
   7  -8   2   21.77    0.76 
   7  -8   2   22.34    0.68 
   7  -8   2   22.02    0.73 
   7  -8   2   23.51    0.68 
   7   8   2   22.47    0.65 
   7   8   2   20.82    0.65 
   7   8   2   21.15    0.68 
  -7   8  -2   22.21    0.67 
   7   8   2   22.21    0.67 
   7   8   2   23.18    0.72 
   8  -8   2   16.49    0.70 
   8  -8   2   15.98    0.66 
   8  -8   2   16.05    0.56 
   8  -8   2   15.79    0.60 
   8  -8   2   16.61    0.62 
  -8  -8  -2   15.77    0.56 
  -8   8  -2   15.94    0.56 
   8   8   2   16.44    0.58 
   8   8   2   16.68    0.62 
   8   8   2   15.76    0.62 
   8   8   2   15.82    0.63 
   9  -8   2    8.70    0.50 
  -9  -8  -2    7.85    0.49 
   9  -8   2    8.95    0.60 
   9  -8   2    9.85    0.57 
   9   8   2    7.35    0.55 
   9   8   2    8.57    0.53 
   9   8   2    7.51    0.56 
   9   8   2    7.77    0.54 
  10  -8   2    8.51    0.60 
  10  -8   2    7.93    0.72 
  10   8   2    6.86    0.66 
  10   8   2    7.77    0.66 
  10   8   2    6.03    0.68 
  10  -9  -2    3.08    0.41 
  10  -9  -2    2.40    0.40 
  10  -9  -2    3.18    0.48 
  10   9  -2    3.35    0.46 
  10   9  -2    3.50    0.42 
  10   9  -2    3.30    0.48 
   9  -9  -2    3.70    0.43 
   9  -9  -2    4.64    0.46 
   9  -9  -2    4.06    0.42 
   9  -9  -2    4.41    0.54 
  -9  -9   2    3.23    0.40 
   9   9  -2    3.97    0.34 
   9   9  -2    4.94    0.48 
   9   9  -2    3.74    0.44 
  -9   9   2    3.79    0.49 
   9   9  -2    4.31    0.53 
   8  -9  -2   20.75    0.63 
   8  -9  -2   18.98    0.72 
   8  -9  -2   19.56    0.78 
   8  -9  -2   19.08    0.72 
   8  -9  -2   19.02    0.64 
  -8  -9   2   19.40    0.61 
  -8   9   2   17.41    0.71 
   8   9  -2   19.59    0.68 
   8   9  -2   19.48    0.66 
   8   9  -2   19.76    0.74 
   8   9  -2   19.65    0.55 
  -7  -9   2   19.60    0.57 
   7  -9  -2   19.11    0.57 
   7  -9  -2   19.48    0.67 
   7  -9  -2   19.00    0.72 
  -7  -9   2   20.51    0.50 
  -7  -9   2   20.73    0.51 
  -7   9   2   20.88    0.70 
   7   9  -2   20.71    0.61 
   7   9  -2   20.38    0.63 
   7   9  -2   19.93    0.52 
   7   9  -2   19.19    0.69 
  -6  -9   2   14.16    0.40 
   6  -9  -2   13.92    0.42 
  -6  -9   2   13.84    0.39 
  -6  -9   2   13.34    0.41 
   6  -9  -2   13.20    0.54 
   6  -9  -2   13.19    0.50 
   6  -9  -2   13.27    0.47 
  -6  -9   2   13.22    0.41 
   6   9  -2   13.94    0.36 
   6   9  -2   13.40    0.45 
   6   9  -2   13.60    0.51 
   6   9  -2   13.52    0.45 
  -6   9   2   12.89    0.47 
  -6   9   2   14.55    0.53 
  -5  -9   2    0.92    0.13 
   5  -9  -2    1.01    0.13 
   5  -9  -2    0.72    0.14 
  -5  -9   2    0.84    0.12 
  -5  -9   2    0.99    0.13 
   5  -9  -2    0.84    0.14 
  -5  -9   2    0.81    0.12 
   5  -9  -2    1.26    0.19 
  -5   9   2    0.97    0.15 
   5   9  -2    1.00    0.15 
   5   9  -2    0.92    0.13 
   5   9  -2    0.96    0.16 
  -5   9   2    0.82    0.13 
   4  -9  -2   55.95    1.25 
  -4  -9   2   58.47    1.24 
  -4  -9   2   54.96    1.16 
  -4  -9   2   50.55    1.08 
  -4  -9   2   57.09    1.25 
   4  -9  -2   53.84    1.33 
  -4   9   2   55.25    1.24 
   4   9  -2   54.81    1.10 
  -4   9   2   54.77    1.19 
   4   9  -2   55.83    1.18 
   4   9  -2   56.57    1.30 
  -3  -9   2   54.93    1.11 
  -3  -9   2   53.64    1.22 
   3  -9  -2   52.68    1.14 
  -3  -9   2   56.45    1.20 
   3  -9  -2   52.85    1.18 
  -3  -9   2   53.68    1.02 
   3  -9  -2   52.99    1.27 
  -3   9   2   52.36    1.17 
  -3   9   2   55.08    1.28 
  -3   9   2   52.68    1.14 
   3   9  -2   53.37    1.16 
   3   9  -2   55.52    1.05 
   3   9  -2   53.61    1.24 
   2  -9  -2   27.76    0.69 
   2  -9  -2   27.16    0.63 
  -2  -9   2   27.81    0.58 
  -2  -9   2   27.57    0.56 
  -2  -9   2   27.79    0.66 
  -2  -9   2   27.50    0.68 
   2  -9  -2   27.68    0.63 
   2   9  -2   27.03    0.57 
  -2   9   2   26.76    0.63 
   2   9  -2   27.41    0.68 
  -2   9   2   27.79    0.71 
  -2   9   2   26.89    0.63 
   2   9  -2   26.74    0.64 
  -1  -9   2  138.44    2.42 
   1  -9  -2  140.13    2.93 
  -1  -9   2  141.09    2.94 
  -1  -9   2  140.96    2.69 
  -1  -9   2  138.87    2.96 
   1  -9  -2  139.23    2.76 
   1  -9  -2  139.89    2.38 
   1  -9  -2  133.89    2.68 
   1  -9  -2  139.47    2.94 
  -1   9   2  136.91    2.76 
   1   9  -2  140.29    2.69 
  -1   9   2  140.45    2.97 
  -1   9   2  138.80    2.69 
   1   9  -2  135.82    2.42 
   1   9  -2  140.31    2.95 
   0  -9  -2   15.03    0.30 
   0  -9  -2   15.58    0.37 
   0  -9   2   15.30    0.34 
   0  -9  -2   15.15    0.40 
   0  -9   2   15.05    0.36 
   0  -9   2   14.92    0.41 
   0  -9  -2   15.33    0.37 
   0  -9   2   14.42    0.43 
   0  -9   2   14.72    0.38 
   0  -9  -2   14.65    0.38 
   0   9   2   15.16    0.38 
   0   9   2   14.85    0.41 
   0   9   2   15.25    0.30 
   0   9   2   15.29    0.34 
   0   9  -2   14.66    0.34 
   0   9   2   15.03    0.39 
   0   9  -2   15.10    0.42 
   0   9   2   15.54    0.32 
   0   9  -2   15.37    0.38 
  -1  -9  -2    9.88    0.22 
  -1  -9  -2    9.56    0.28 
   1  -9   2    9.70    0.28 
   1  -9   2    9.91    0.25 
  -1  -9  -2    9.19    0.27 
   1  -9   2    9.61    0.28 
   1  -9   2    9.52    0.33 
   1  -9   2    9.67    0.31 
   1   9   2    9.66    0.29 
   1   9   2    9.59    0.25 
  -1   9  -2   10.03    0.31 
   1   9   2    9.90    0.23 
  -1   9  -2    9.61    0.28 
  -1   9  -2    9.58    0.33 
   1   9   2   10.25    0.28 
   1   9   2   10.12    0.27 
  -2  -9  -2   10.63    0.29 
  -2  -9  -2   10.43    0.25 
   2  -9   2   10.49    0.29 
   2  -9   2    9.95    0.31 
   2  -9   2    9.86    0.30 
   2  -9   2    9.73    0.36 
   2  -9   2   10.08    0.34 
   2   9   2   10.52    0.30 
   2   9   2   10.17    0.29 
   2   9   2   10.58    0.27 
  -2   9  -2   10.51    0.36 
   2   9   2   10.47    0.28 
   2   9   2   10.26    0.31 
  -2   9  -2   10.61    0.29 
   2   9   2   10.23    0.26 
   2   9   2   10.28    0.25 
  -2   9  -2   10.50    0.30 
  -2   9  -2   10.16    0.31 
   3  -9   2  443.84    8.41 
   3  -9   2  422.51    9.22 
  -3  -9  -2  439.94    7.68 
   3  -9   2  437.08    8.72 
   3  -9   2  444.18    8.86 
   3   9   2  444.21    7.57 
   3   9   2  443.57    8.52 
   3   9   2  437.41    9.19 
  -3   9  -2  443.67    8.43 
  -3   9  -2  458.76    9.29 
   3   9   2  454.03    8.99 
   3   9   2  444.33    9.21 
   3   9   2  443.94    8.81 
  -3   9  -2  440.88    8.91 
   4  -9   2   19.23    0.61 
   4  -9   2   19.01    0.52 
   4  -9   2   19.74    0.56 
  -4  -9  -2   19.61    0.48 
   4  -9   2   20.29    0.53 
  -4  -9  -2   19.97    0.46 
   4   9   2   20.12    0.49 
   4   9   2   20.05    0.52 
   4   9   2   19.31    0.49 
  -4   9  -2   19.34    0.52 
   4   9   2   18.40    0.54 
   4   9   2   19.29    0.49 
  -4   9  -2   20.72    0.59 
   5  -9   2  285.41    5.50 
   5  -9   2  285.82    5.77 
   5  -9   2  277.58    6.09 
  -5  -9  -2  284.36    5.66 
   5  -9   2  286.01    5.78 
   5   9   2  284.20    5.95 
   5   9   2  290.98    5.68 
   5   9   2  283.01    4.99 
   5   9   2  293.36    5.79 
  -5   9  -2  286.40    5.76 
   6  -9   2   10.30    0.48 
   6  -9   2   10.92    0.42 
   6  -9   2   10.64    0.45 
   6  -9   2   11.15    0.42 
  -6  -9  -2   11.12    0.37 
  -6   9  -2   11.30    0.43 
   6   9   2   10.75    0.41 
   6   9   2   10.79    0.40 
   6   9   2   10.54    0.40 
   6   9   2   11.01    0.40 
  -6   9  -2   10.86    0.44 
   7  -9   2  126.14    2.99 
   7  -9   2  130.87    2.85 
   7  -9   2  129.79    2.81 
   7  -9   2  131.84    2.70 
  -7  -9  -2  127.30    2.71 
   7   9   2  131.27    2.76 
   7   9   2  127.78    2.48 
  -7   9  -2  136.61    2.89 
   7   9   2  132.54    2.86 
   7   9   2  125.71    2.86 
   8  -9   2    1.95    0.27 
   8  -9   2    1.75    0.30 
  -8  -9  -2    1.94    0.25 
   8  -9   2    1.65    0.27 
   8  -9   2    1.68    0.26 
   8  -9   2    1.91    0.24 
   8   9   2    1.48    0.27 
   8   9   2    2.46    0.33 
   8   9   2    1.93    0.27 
  -8   9  -2    1.63    0.24 
   8   9   2    1.84    0.26 
   9  -9   2   34.74    1.09 
   9  -9   2   34.68    0.93 
  -9  -9  -2   31.92    0.95 
   9  -9   2   33.67    1.14 
   9   9   2   33.03    0.98 
   9   9   2   32.82    1.06 
   9   9   2   35.10    1.03 
   9   9   2   33.78    1.00 
  10   9   2    8.13    0.73 
  10 -10  -2    3.97    0.57 
  10 -10  -2    3.82    0.43 
  10  10  -2    3.94    0.51 
  10  10  -2    4.02    0.50 
   9 -10  -2   16.40    0.72 
   9 -10  -2   15.29    0.77 
   9 -10  -2   16.24    0.63 
   9 -10  -2   15.05    0.64 
   9  10  -2   15.69    0.68 
  -9  10   2   14.98    0.72 
   9  10  -2   15.74    0.68 
   9  10  -2   15.41    0.77 
   8 -10  -2   16.31    0.56 
   8 -10  -2   15.36    0.70 
   8 -10  -2   15.86    0.65 
   8 -10  -2   14.48    0.56 
  -8 -10   2   15.00    0.54 
   8  10  -2   16.00    0.60 
   8  10  -2   15.59    0.67 
   8  10  -2   15.60    0.60 
   8  10  -2   15.30    0.47 
   7 -10  -2    9.47    0.47 
   7 -10  -2    8.83    0.49 
  -7 -10   2    8.56    0.36 
   7 -10  -2    9.40    0.39 
   7 -10  -2    9.16    0.39 
   7  10  -2    9.13    0.41 
   7  10  -2    9.10    0.47 
  -7  10   2    8.66    0.42 
   7  10  -2    9.72    0.31 
   7  10  -2    9.62    0.43 
  -7  10   2    9.18    0.47 
   6 -10  -2    1.44    0.21 
  -6 -10   2    1.32    0.16 
  -6 -10   2    1.23    0.17 
  -6 -10   2    1.06    0.14 
   6 -10  -2    1.41    0.16 
  -6 -10   2    1.34    0.14 
   6 -10  -2    0.85    0.18 
  -6  10   2    1.40    0.18 
   6  10  -2    1.47    0.20 
  -6  10   2    1.35    0.20 
   6  10  -2    1.31    0.17 
   6  10  -2    1.25    0.19 
   5 -10  -2   46.53    1.22 
   5 -10  -2   46.87    1.14 
  -5 -10   2   48.63    1.09 
   5 -10  -2   46.80    1.09 
  -5 -10   2   45.95    1.03 
  -5 -10   2   49.33    1.07 
  -5 -10   2   47.27    0.97 
   5  10  -2   46.58    1.00 
  -5  10   2   46.00    1.12 
   5  10  -2   48.40    1.18 
  -5  10   2   49.72    1.22 
   5  10  -2   46.99    1.06 
  -4 -10   2   12.98    0.36 
  -4 -10   2   12.23    0.33 
   4 -10  -2   12.39    0.41 
   4 -10  -2   12.54    0.40 
  -4 -10   2   12.72    0.38 
  -4 -10   2   12.81    0.35 
   4 -10  -2   12.38    0.45 
  -4  10   2   12.07    0.39 
   4  10  -2   12.11    0.42 
  -4  10   2   11.86    0.39 
   4  10  -2   12.03    0.42 
  -4  10   2   12.86    0.45 
   4  10  -2   12.88    0.38 
  -3 -10   2   15.69    0.36 
   3 -10  -2   15.36    0.48 
  -3 -10   2   15.66    0.42 
  -3 -10   2   15.34    0.44 
   3 -10  -2   14.92    0.43 
   3 -10  -2   15.02    0.43 
  -3 -10   2   15.01    0.38 
   3  10  -2   15.72    0.46 
   3  10  -2   14.80    0.44 
  -3  10   2   15.80    0.50 
  -3  10   2   14.92    0.42 
   3  10  -2   15.39    0.40 
  -3  10   2   15.42    0.43 
  -2 -10   2   52.80    1.22 
  -2 -10   2   52.29    1.01 
  -2 -10   2   54.62    1.09 
   2 -10  -2   52.83    1.24 
   2 -10  -2   53.30    1.14 
  -2 -10   2   55.55    1.20 
   2 -10  -2   54.21    1.13 
   2  10  -2   52.92    1.14 
  -2  10   2   52.87    1.13 
   2  10  -2   53.88    1.02 
  -2  10   2   51.93    1.14 
   2  10  -2   53.92    1.23 
  -2  10   2   54.86    1.26 
   1 -10  -2  103.66    2.06 
  -1 -10   2  106.58    2.25 
  -1 -10   2  105.08    2.06 
   1 -10  -2  106.10    2.24 
   1 -10  -2  104.78    2.10 
  -1 -10   2  105.30    1.85 
   1 -10  -2  105.85    1.80 
   1 -10  -2  105.51    2.23 
  -1 -10   2  102.83    2.27 
  -1  10   2  104.00    2.06 
   1  10  -2  103.74    2.26 
   1  10  -2  103.06    2.06 
  -1  10   2  104.89    2.28 
  -1  10   2  102.99    2.10 
   1  10  -2  102.10    1.85 
   0 -10  -2   47.24    0.83 
   0 -10  -2   47.45    1.02 
   0 -10  -2   47.47    1.03 
   0 -10  -2   46.06    0.98 
   0 -10   2   46.33    0.98 
   0 -10   2   46.56    1.08 
   0 -10  -2   46.28    1.03 
   0 -10   2   47.61    0.99 
   0 -10   2   46.29    0.88 
   0 -10   2   45.74    1.10 
   0  10   2   47.11    0.96 
   0  10   2   46.34    0.99 
   0  10  -2   48.35    0.99 
   0  10   2   46.65    1.08 
   0  10   2   47.58    0.84 
   0  10   2   47.34    1.05 
   0  10  -2   46.70    0.89 
   1 -10   2    0.33    0.08 
  -1 -10  -2    0.05    0.04 
  -1 -10  -2    0.20    0.06 
   1 -10   2    0.17    0.06 
  -1 -10  -2    0.12    0.06 
   1 -10   2    0.16    0.06 
   1 -10   2    0.27    0.05 
   1  10   2    0.13    0.05 
  -1  10  -2    0.30    0.05 
  -1  10  -2    0.10    0.07 
   1  10   2    0.17    0.06 
   1  10   2    0.12    0.05 
  -1  10  -2    0.16    0.06 
   1  10   2    0.24    0.05 
   2 -10   2  118.20    2.31 
   2 -10   2  114.00    2.58 
  -2 -10  -2  119.29    2.41 
  -2 -10  -2  118.33    2.05 
   2 -10   2  115.98    2.40 
   2 -10   2  117.19    2.55 
   2 -10   2  117.65    2.39 
   2  10   2  114.12    2.40 
  -2  10  -2  117.02    2.41 
  -2  10  -2  114.76    2.39 
  -2  10  -2  120.69    2.58 
   2  10   2  118.79    2.47 
   2  10   2  118.81    2.06 
   2  10   2  121.05    2.43 
  -2  10  -2  117.94    2.30 
   2  10   2  117.39    2.48 
   2  10   2  116.34    2.33 
   3 -10   2   11.24    0.34 
   3 -10   2   10.67    0.36 
   3 -10   2   11.33    0.33 
  -3 -10  -2   10.86    0.29 
   3 -10   2   10.86    0.38 
   3 -10   2   10.85    0.41 
   3  10   2   10.62    0.36 
   3  10   2   10.84    0.28 
  -3  10  -2   11.36    0.36 
  -3  10  -2   10.59    0.34 
  -3  10  -2   11.50    0.40 
   3  10   2   11.01    0.31 
   3  10   2   11.02    0.30 
   3  10   2   11.39    0.33 
   3  10   2   10.74    0.31 
  -4 -10  -2  236.27    4.09 
   4 -10   2  237.76    4.78 
   4 -10   2  235.31    4.77 
   4 -10   2  226.34    5.05 
   4  10   2  236.25    4.79 
  -4  10  -2  237.67    4.55 
   4  10   2  238.56    4.67 
  -4  10  -2  247.79    5.04 
  -4  10  -2  235.54    4.77 
   4  10   2  236.26    4.91 
   4  10   2  230.81    4.58 
   4  10   2  235.83    4.12 
   5 -10   2    0.77    0.16 
   5 -10   2    0.24    0.12 
  -5 -10  -2    0.24    0.09 
   5 -10   2    0.31    0.11 
   5 -10   2    0.26    0.13 
   5  10   2    0.23    0.13 
   5  10   2    0.26    0.10 
  -5  10  -2    0.44    0.13 
  -5  10  -2    0.16    0.12 
   5  10   2    0.22    0.13 
   5  10   2    0.31    0.11 
   5  10   2    0.24    0.10 
   6 -10   2   77.82    1.69 
   6 -10   2   75.35    1.90 
  -6 -10  -2   77.99    1.67 
   6 -10   2   79.17    1.75 
   6  10   2   80.88    1.71 
   6  10   2   80.07    1.73 
   6  10   2   75.52    1.76 
  -6  10  -2   82.07    1.84 
   6  10   2   76.26    1.56 
  -6  10  -2   74.94    1.76 
  -7 -10  -2    8.38    0.37 
   7 -10   2    9.07    0.46 
   7 -10   2    8.84    0.42 
   7 -10   2    8.75    0.43 
   7 -10   2    8.60    0.50 
   7  10   2    8.27    0.41 
  -7  10  -2    8.63    0.43 
   7  10   2   10.12    0.46 
   7  10   2    9.11    0.44 
   7  10   2    9.73    0.42 
   8 -10   2   54.00    1.42 
  -8 -10  -2   52.04    1.27 
   8 -10   2   52.27    1.49 
   8 -10   2   54.45    1.37 
   8 -10   2   53.75    1.35 
   8 -10   2   55.50    1.21 
   8  10   2   52.81    1.31 
   8  10   2   51.07    1.37 
   8  10   2   53.26    1.26 
  -8  10  -2   54.95    1.36 
   8  10   2   54.41    1.33 
  -9 -10  -2    0.70    0.27 
   9 -10   2    1.27    0.33 
   9 -10   2    0.66    0.25 
   9 -10   2    0.81    0.30 
   9  10   2    0.63    0.30 
   9  10   2    1.02    0.30 
   9  10   2    0.85    0.30 
   9  10   2    0.82    0.31 
  10  11  -2   13.85    0.86 
   9 -11  -2    9.39    0.55 
   9 -11  -2    9.65    0.67 
   9 -11  -2    9.56    0.53 
   9 -11  -2    9.88    0.60 
   9  11  -2   10.25    0.67 
   9  11  -2    9.59    0.59 
   9  11  -2   11.41    0.61 
  -8 -11   2   56.87    1.37 
   8 -11  -2   57.85    1.62 
   8 -11  -2   58.78    1.44 
   8 -11  -2   61.11    1.30 
   8 -11  -2   59.57    1.53 
   8  11  -2   59.72    1.37 
   8  11  -2   60.89    1.45 
   8  11  -2   59.69    1.30 
  -8  11   2   62.13    1.58 
   8  11  -2   60.16    1.58 
   7 -11  -2    1.19    0.24 
   7 -11  -2    0.74    0.19 
   7 -11  -2    1.07    0.23 
  -7 -11   2    0.78    0.16 
   7 -11  -2    0.75    0.17 
   7  11  -2    1.16    0.21 
   7  11  -2    0.94    0.20 
   7  11  -2    0.75    0.21 
  -7  11   2    0.93    0.20 
  -6 -11   2   48.15    1.03 
   6 -11  -2   50.23    1.03 
  -6 -11   2   50.70    1.11 
   6 -11  -2   48.10    1.15 
   6 -11  -2   47.05    1.22 
  -6 -11   2   51.21    1.10 
  -6 -11   2   47.83    1.10 
   6  11  -2   49.22    1.26 
   6  11  -2   50.76    1.14 
  -6  11   2   48.18    1.20 
  -6  11   2   52.03    1.30 
   5 -11  -2    1.78    0.25 
  -5 -11   2    1.97    0.15 
  -5 -11   2    2.18    0.19 
  -5 -11   2    2.30    0.16 
  -5 -11   2    2.15    0.17 
   5 -11  -2    1.98    0.22 
   5 -11  -2    1.91    0.23 
   5  11  -2    2.38    0.22 
   5  11  -2    1.90    0.23 
   5  11  -2    1.96    0.24 
  -5  11   2    2.00    0.21 
  -5  11   2    2.36    0.26 
   4 -11  -2   80.23    1.79 
   4 -11  -2   81.60    1.92 
  -4 -11   2   82.25    1.69 
  -4 -11   2   86.48    1.80 
   4 -11  -2   83.77    1.74 
  -4 -11   2   84.72    1.82 
  -4 -11   2   83.03    1.55 
   4  11  -2   83.39    1.88 
  -4  11   2   84.33    1.93 
   4  11  -2   83.73    1.58 
   4  11  -2   79.22    1.75 
  -4  11   2   83.14    1.73 
  -3 -11   2    0.40    0.08 
  -3 -11   2    0.39    0.09 
  -3 -11   2    0.58    0.07 
   3 -11  -2    0.36    0.09 
   3 -11  -2    0.61    0.12 
  -3 -11   2    0.38    0.08 
   3 -11  -2    0.28    0.08 
   3 -11  -2    0.37    0.06 
   3  11  -2    0.59    0.11 
  -3  11   2    0.36    0.09 
   3  11  -2    0.33    0.09 
  -3  11   2    0.28    0.10 
  -3  11   2    0.40    0.10 
   3  11  -2    0.39    0.10 
  -2 -11   2   58.35    1.29 
   2 -11  -2   57.64    1.32 
  -2 -11   2   57.95    1.09 
  -2 -11   2   57.64    1.32 
   2 -11  -2   58.05    1.22 
   2 -11  -2   57.92    1.23 
   2 -11  -2   58.20    1.34 
  -2 -11   2   59.73    1.17 
   2  11  -2   58.31    1.10 
  -2  11   2   56.03    1.21 
  -2  11   2   58.11    1.36 
   2  11  -2   56.50    1.32 
  -2  11   2   57.12    1.25 
   1 -11  -2   11.63    0.34 
  -1 -11   2   11.72    0.30 
  -1 -11   2   11.58    0.28 
  -1 -11   2   11.46    0.38 
  -1 -11   2   12.23    0.36 
   1 -11  -2   11.48    0.35 
  -1 -11   2   12.16    0.34 
   1 -11  -2   12.05    0.31 
   1 -11  -2   11.35    0.25 
   1 -11  -2   12.23    0.34 
   1  11  -2   11.78    0.34 
  -1  11   2   11.35    0.34 
   1  11  -2   11.44    0.30 
  -1  11   2   11.44    0.30 
  -1  11   2   11.74    0.38 
   1  11  -2   11.74    0.37 
   0 -11  -2   17.81    0.43 
   0 -11  -2   17.83    0.44 
   0 -11  -2   17.78    0.46 
   0 -11   2   17.56    0.41 
   0 -11   2   17.14    0.40 
   0 -11   2   16.80    0.50 
   0 -11   2   17.48    0.48 
   0 -11  -2   16.96    0.44 
   0 -11  -2   17.34    0.35 
   0 -11   2   17.94    0.45 
   0  11  -2   17.45    0.40 
   0  11   2   17.19    0.46 
   0  11   2   17.18    0.45 
   0  11  -2   17.90    0.52 
   0  11   2   17.82    0.49 
   0  11  -2   17.42    0.49 
   0  11   2   17.63    0.35 
   0  11   2   17.28    0.39 
   0  11  -2   17.50    0.44 
   1 -11   2  116.71    2.07 
   1 -11   2  114.51    2.36 
  -1 -11  -2  119.52    2.30 
   1 -11   2  115.60    2.53 
  -1 -11  -2  117.28    2.02 
  -1 -11  -2  117.21    2.41 
   1 -11   2  114.51    2.56 
   1 -11   2  119.51    2.30 
   1  11   2  117.15    2.50 
  -1  11  -2  115.84    2.53 
   1  11   2  115.28    2.31 
   1  11   2  118.58    2.48 
  -1  11  -2  119.92    2.57 
   1  11   2  114.57    2.35 
   1  11   2  118.35    2.03 
  -1  11  -2  115.71    2.29 
  -1  11  -2  116.70    2.36 
  -2 -11  -2    1.24    0.12 
   2 -11   2    1.32    0.13 
   2 -11   2    1.44    0.17 
   2 -11   2    1.25    0.13 
   2 -11   2    1.80    0.16 
   2 -11   2    1.31    0.10 
  -2 -11  -2    1.28    0.10 
  -2  11  -2    1.26    0.11 
   2  11   2    1.39    0.11 
  -2  11  -2    1.18    0.12 
   2  11   2    1.17    0.11 
   2  11   2    1.40    0.12 
   2  11   2    1.17    0.11 
   2  11   2    1.03    0.13 
  -2  11  -2    1.38    0.16 
  -2  11  -2    1.35    0.13 
   2  11   2    1.30    0.11 
  -3 -11  -2   63.90    1.32 
   3 -11   2   61.56    1.36 
   3 -11   2   61.44    1.31 
   3 -11   2   59.82    1.47 
   3 -11   2   62.88    1.33 
  -3 -11  -2   60.73    1.14 
   3  11   2   60.25    1.35 
  -3  11  -2   61.33    1.36 
  -3  11  -2   60.90    1.30 
   3  11   2   61.73    1.33 
   3  11   2   62.57    1.25 
   3  11   2   62.37    1.34 
  -3  11  -2   63.98    1.47 
   3  11   2   60.96    1.17 
   3  11   2   60.77    1.35 
   4 -11   2    0.62    0.13 
   4 -11   2    0.65    0.12 
  -4 -11  -2    0.56    0.09 
   4 -11   2    0.74    0.12 
   4 -11   2    0.98    0.17 
   4  11   2    0.71    0.13 
   4  11   2    0.77    0.14 
  -4  11  -2    0.47    0.10 
  -4  11  -2    0.45    0.12 
   4  11   2    0.81    0.12 
  -4  11  -2    0.59    0.11 
   4  11   2    0.65    0.10 
   4  11   2    0.64    0.09 
   5 -11   2  123.84    2.60 
  -5 -11  -2  121.85    2.23 
   5 -11   2  121.17    2.81 
   5 -11   2  125.01    2.64 
  -5 -11  -2  122.53    2.51 
   5 -11   2  126.13    2.52 
   5  11   2  124.15    2.59 
   5  11   2  121.40    2.65 
   5  11   2  126.18    2.53 
   5  11   2  124.50    2.29 
  -5  11  -2  120.94    2.62 
  -5  11  -2  130.81    2.77 
   5  11   2  117.77    2.54 
  -6 -11  -2   26.34    0.68 
   6 -11   2   27.69    0.74 
   6 -11   2   28.14    0.81 
   6 -11   2   27.23    0.75 
   6 -11   2   26.41    0.88 
   6  11   2   27.49    0.71 
   6  11   2   27.58    0.72 
  -6  11  -2   28.56    0.81 
   6  11   2   26.68    0.73 
   6  11   2   27.06    0.71 
  -6  11  -2   25.30    0.77 
   7 -11   2    8.19    0.40 
   7 -11   2    8.50    0.43 
  -7 -11  -2    7.47    0.34 
   7 -11   2    8.41    0.46 
   7 -11   2    8.22    0.49 
  -7  11  -2    7.22    0.40 
   7  11   2    7.71    0.38 
   7  11   2    7.72    0.44 
   7  11   2    8.36    0.40 
   7  11   2    7.36    0.42 
   7  11   2    8.85    0.45 
  -7  11  -2    7.86    0.43 
   7  11   2    7.96    0.41 
   8 -11   2    6.33    0.51 
   8 -11   2    6.25    0.46 
  -8 -11  -2    6.18    0.37 
   8 -11   2    6.24    0.43 
   8  11   2    6.23    0.42 
   8  11   2    5.84    0.45 
  -8  11  -2    4.92    0.43 
   8  11   2    6.52    0.42 
   8  11   2    6.09    0.47 
   9 -11   2   44.69    1.11 
   9 -11   2   43.00    1.36 
   9 -11   2   44.64    1.31 
   9  11   2   43.39    1.19 
   9  11   2   44.85    1.22 
   9  11   2   41.17    1.26 
   9 -12  -2   61.09    1.65 
   9 -12  -2   63.22    1.40 
   9 -12  -2   61.22    1.54 
   9 -12  -2   61.83    1.76 
   9  12  -2   61.55    1.71 
   9  12  -2   61.81    1.49 
   9  12  -2   62.31    1.56 
   8 -12  -2    1.40    0.29 
   8 -12  -2    1.49    0.24 
   8 -12  -2    1.19    0.23 
  -8 -12   2    1.45    0.22 
   8 -12  -2    1.75    0.28 
   8  12  -2    1.27    0.29 
   8  12  -2    1.57    0.26 
   8  12  -2    1.99    0.30 
  -8  12   2    1.75    0.29 
   7 -12  -2  225.71    5.09 
  -7 -12   2  222.46    4.10 
   7 -12  -2  232.10    4.74 
  -7 -12   2  232.75    4.64 
   7 -12  -2  231.52    4.81 
   7  12  -2  237.74    4.20 
   7  12  -2  226.96    5.03 
   7  12  -2  240.76    4.70 
  -7  12   2  228.21    4.77 
   6 -12  -2    0.30    0.12 
   6 -12  -2    0.12    0.14 
  -6 -12   2    0.19    0.11 
   6 -12  -2    0.19    0.11 
  -6 -12   2    0.24    0.08 
  -6 -12   2    0.37    0.13 
  -6  12   2    0.24    0.16 
   6  12  -2    0.17    0.14 
   6  12  -2    0.09    0.14 
  -6  12   2    0.33    0.14 
   6  12  -2    0.38    0.16 
   5 -12  -2  179.01    3.70 
  -5 -12   2  178.43    3.18 
   5 -12  -2  177.71    3.94 
   5 -12  -2  174.97    3.64 
   5 -12  -2  174.66    3.55 
  -5 -12   2  184.57    3.76 
  -5 -12   2  189.15    3.75 
  -5 -12   2  176.65    3.57 
   5  12  -2  172.64    3.59 
   5  12  -2  176.80    3.23 
  -5  12   2  177.19    3.69 
  -5  12   2  185.51    3.95 
   5  12  -2  181.09    3.88 
  -4 -12   2    1.87    0.17 
   4 -12  -2    1.67    0.13 
   4 -12  -2    1.56    0.19 
  -4 -12   2    2.03    0.17 
   4 -12  -2    1.84    0.19 
  -4 -12   2    1.90    0.15 
  -4 -12   2    2.12    0.12 
   4 -12  -2    2.05    0.22 
   4  12  -2    1.87    0.21 
  -4  12   2    1.83    0.18 
  -4  12   2    1.83    0.19 
  -4  12   2    1.84    0.22 
   4  12  -2    1.80    0.21 
   4  12  -2    1.79    0.19 
   3 -12  -2  263.74    5.01 
   3 -12  -2  256.08    5.49 
  -3 -12   2  259.47    5.09 
  -3 -12   2  262.26    4.48 
   3 -12  -2  259.66    5.17 
   3 -12  -2  254.84    5.14 
  -3 -12   2  267.47    5.40 
  -3 -12   2  262.59    5.43 
  -3  12   2  256.38    4.98 
   3  12  -2  262.94    5.46 
  -3  12   2  255.11    5.54 
  -3  12   2  254.47    5.17 
   3  12  -2  255.91    4.50 
   3  12  -2  261.01    5.01 
   2 -12  -2    8.10    0.32 
  -2 -12   2    7.95    0.30 
  -2 -12   2    8.61    0.28 
  -2 -12   2    7.94    0.25 
   2 -12  -2    8.26    0.21 
   2 -12  -2    8.34    0.30 
  -2 -12   2    8.53    0.21 
  -2 -12   2    8.58    0.21 
   2 -12  -2    8.18    0.27 
   2 -12  -2    8.28    0.29 
   2  12  -2    8.26    0.27 
  -2  12   2    8.03    0.29 
  -2  12   2    8.42    0.34 
   2  12  -2    8.12    0.31 
  -2  12   2    7.81    0.27 
   2  12  -2    7.80    0.29 
   1 -12  -2  189.88    3.95 
   1 -12  -2  190.93    3.21 
   1 -12  -2  186.00    3.63 
  -1 -12   2  184.43    3.99 
   1 -12  -2  187.37    3.72 
  -1 -12   2  186.10    3.69 
  -1 -12   2  187.49    3.26 
  -1 -12   2  196.66    3.64 
   1 -12  -2  191.72    3.96 
  -1 -12   2  192.36    3.97 
  -1  12   2  186.02    3.64 
  -1  12   2  190.32    4.01 
   1  12  -2  186.57    3.99 
  -1  12   2  184.49    3.72 
   1  12  -2  185.22    3.27 
   1  12  -2  182.45    3.63 
   0 -12   2   13.96    0.35 
   0 -12   2   14.45    0.42 
   0 -12  -2   14.70    0.38 
   0 -12   2   14.25    0.45 
   0 -12  -2   13.88    0.40 
   0 -12   2   14.31    0.36 
   0 -12   2   14.68    0.40 
   0 -12  -2   15.83    0.39 
   0 -12  -2   14.36    0.31 
   0  12   2   14.53    0.33 
   0  12   2   13.93    0.41 
   0  12   2   14.39    0.40 
   0  12   2   14.61    0.44 
   0  12  -2   14.14    0.40 
   0  12  -2   14.83    0.47 
   0  12  -2   13.99    0.43 
   0  12  -2   14.32    0.35 
   0  12   2   14.62    0.31 
  -1 -12  -2   71.00    1.43 
   1 -12   2   70.26    1.28 
   1 -12   2   69.18    1.56 
   1 -12   2   66.95    1.60 
  -1 -12  -2   69.51    1.23 
   1 -12   2   69.02    1.44 
  -1 -12  -2   68.07    1.47 
   1 -12   2   67.24    1.42 
   1  12   2   69.86    1.24 
  -1  12  -2   71.08    1.57 
   1  12   2   66.16    1.43 
  -1  12  -2   69.57    1.43 
   1  12   2   69.05    1.42 
  -1  12  -2   69.87    1.42 
   1  12   2   67.96    1.54 
   1  12   2   69.19    1.52 
  -1  12  -2   69.99    1.61 
   2 -12   2    0.54    0.11 
  -2 -12  -2    0.28    0.08 
   2 -12   2    0.44    0.09 
   2 -12   2    0.60    0.12 
  -2 -12  -2    0.58    0.09 
  -2 -12  -2    0.43    0.07 
   2 -12   2    0.70    0.10 
   2 -12   2    0.30    0.08 
   2  12   2    0.42    0.08 
  -2  12  -2    0.59    0.10 
   2  12   2    0.55    0.09 
  -2  12  -2    0.42    0.08 
   2  12   2    0.43    0.09 
  -2  12  -2    0.29    0.08 
   2  12   2    0.39    0.07 
  -2  12  -2    0.43    0.11 
   2  12   2    0.57    0.08 
   3 -12   2    0.33    0.09 
  -3 -12  -2    0.46    0.08 
   3 -12   2    0.54    0.11 
  -3 -12  -2    0.57    0.09 
   3 -12   2    0.45    0.13 
   3 -12   2    0.51    0.08 
   3 -12   2    0.48    0.10 
   3  12   2    0.35    0.09 
   3  12   2    0.47    0.09 
  -3  12  -2    0.51    0.10 
   3  12   2    0.52    0.09 
  -3  12  -2    0.53    0.11 
   3  12   2    0.50    0.06 
  -3  12  -2    0.34    0.11 
   3  12   2    0.63    0.09 
   3  12   2    0.68    0.12 
   4 -12   2    1.17    0.17 
   4 -12   2    1.06    0.14 
   4 -12   2    0.66    0.15 
   4 -12   2    1.04    0.13 
   4  12   2    0.79    0.13 
  -4  12  -2    1.14    0.15 
   4  12   2    0.79    0.11 
   4  12   2    0.85    0.15 
   4  12   2    1.04    0.14 
  -4  12  -2    0.69    0.12 
  -4  12  -2    1.40    0.18 
   4  12   2    0.86    0.11 
  -5 -12  -2    1.55    0.17 
   5 -12   2    1.40    0.18 
   5 -12   2    1.72    0.19 
   5 -12   2    1.34    0.21 
   5 -12   2    1.69    0.22 
  -5  12  -2    1.87    0.24 
   5  12   2    1.84    0.20 
   5  12   2    1.41    0.18 
   5  12   2    2.08    0.23 
   5  12   2    2.14    0.21 
  -5  12  -2    2.01    0.22 
   5  12   2    1.78    0.17 
   6 -12   2    0.51    0.15 
   6 -12   2    0.62    0.19 
   6 -12   2    0.40    0.16 
   6 -12   2    0.47    0.16 
   6  12   2    0.65    0.15 
   6  12   2    0.46    0.15 
   6  12   2    0.68    0.18 
  -6  12  -2    0.83    0.17 
   6  12   2    0.52    0.16 
   6  12   2    0.65    0.17 
   6  12   2    0.65    0.15 
  -6  12  -2    0.72    0.17 
   7 -12   2    1.07    0.25 
   7 -12   2    1.03    0.22 
   7 -12   2    1.57    0.23 
  -7 -12  -2    0.96    0.17 
   7 -12   2    0.92    0.22 
   7  12   2    0.98    0.24 
   7  12   2    1.05    0.23 
  -7  12  -2    0.58    0.22 
   7  12   2    1.01    0.20 
   7  12   2    1.25    0.22 
  -7  12  -2    0.85    0.19 
   7  12   2    1.46    0.24 
   7  12   2    1.20    0.21 
   8 -12   2    0.47    0.25 
   8 -12   2    0.41    0.22 
   8 -12   2    0.62    0.27 
  -8 -12  -2    0.53    0.20 
   8  12   2    0.51    0.25 
   8  12   2    0.32    0.23 
   8  12   2    0.63    0.27 
   8  12   2    0.69    0.24 
   8  12   2    0.33    0.23 
   9 -12   2   26.13    0.95 
   9 -12   2   25.77    0.81 
   9 -12   2   25.45    1.02 
   9  12   2   24.08    0.92 
   9  12   2   27.22    0.91 
   9  12   2   27.37    0.90 
   9  12   2   23.76    0.91 
   9 -13  -2   15.24    0.67 
   9 -13  -2   15.36    0.82 
   9 -13  -2   14.45    0.73 
   9 -13  -2   16.05    0.65 
   9  13  -2   16.60    0.78 
   9  13  -2   15.65    0.72 
   9  13  -2   15.04    0.68 
   9  13  -2   14.90    0.79 
   8 -13  -2   41.39    0.98 
   8 -13  -2   39.24    1.05 
   8 -13  -2   40.02    1.16 
   8 -13  -2   39.63    1.25 
  -8 -13   2   38.35    0.98 
   8  13  -2   40.78    1.05 
   8  13  -2   39.01    1.18 
   8  13  -2   39.75    1.05 
   8  13  -2   39.65    1.16 
  -8  13   2   41.53    1.22 
  -7 -13   2    3.20    0.28 
   7 -13  -2    3.88    0.40 
   7 -13  -2    3.18    0.35 
   7 -13  -2    3.55    0.29 
  -7  13   2    4.04    0.39 
   7  13  -2    3.76    0.34 
   7  13  -2    3.40    0.38 
  -7  13   2    3.26    0.35 
   6 -13  -2   59.79    1.59 
   6 -13  -2   63.72    1.39 
  -6 -13   2   61.31    1.34 
   6 -13  -2   62.27    1.49 
  -6  13   2   65.62    1.62 
  -6  13   2   61.10    1.47 
   6  13  -2   61.77    1.32 
   6  13  -2   61.62    1.48 
   6  13  -2   63.70    1.55 
  -5 -13   2    2.02    0.15 
   5 -13  -2    1.87    0.24 
  -5 -13   2    2.39    0.21 
  -5 -13   2    1.93    0.17 
   5 -13  -2    1.90    0.17 
  -5 -13   2    1.80    0.14 
   5 -13  -2    2.16    0.28 
  -5  13   2    1.92    0.26 
   5  13  -2    1.89    0.24 
   5  13  -2    1.97    0.23 
  -5  13   2    1.77    0.22 
   5  13  -2    2.12    0.26 
  -5  13   2    1.87    0.23 
   4 -13  -2   70.97    1.57 
  -4 -13   2   70.39    1.36 
  -4 -13   2   72.77    1.56 
   4 -13  -2   72.03    1.53 
  -4 -13   2   70.05    1.45 
  -4 -13   2   73.10    1.58 
   4 -13  -2   71.79    1.48 
   4 -13  -2   70.71    1.69 
   4  13  -2   70.62    1.39 
   4  13  -2   68.00    1.55 
  -4  13   2   72.10    1.72 
   4  13  -2   71.04    1.65 
  -4  13   2   69.57    1.56 
  -4  13   2   69.25    1.52 
   3 -13  -2    7.34    0.20 
  -3 -13   2    7.67    0.20 
   3 -13  -2    7.57    0.34 
   3 -13  -2    7.68    0.29 
  -3 -13   2    7.55    0.27 
  -3 -13   2    7.56    0.29 
  -3 -13   2    7.53    0.27 
   3  13  -2    7.43    0.28 
  -3  13   2    7.72    0.31 
   3  13  -2    7.33    0.31 
   3  13  -2    7.58    0.32 
  -3  13   2    7.37    0.29 
  -3  13   2    8.00    0.36 
   2 -13  -2   62.39    1.37 
  -2 -13   2   64.59    1.21 
  -2 -13   2   63.61    1.46 
  -2 -13   2   65.55    1.28 
  -2 -13   2   66.28    1.31 
   2 -13  -2   65.36    1.47 
   2 -13  -2   65.44    1.48 
  -2 -13   2   65.97    1.44 
   2 -13  -2   64.27    1.16 
   2 -13  -2   63.73    1.36 
  -2  13   2   64.11    1.52 
   2  13  -2   62.81    1.22 
  -2  13   2   61.56    1.36 
   2  13  -2   62.59    1.47 
  -2  13   2   64.92    1.36 
   2  13  -2   61.64    1.36 
   1 -13  -2   16.94    0.35 
  -1 -13   2   16.97    0.46 
   1 -13  -2   17.07    0.46 
   1 -13  -2   17.08    0.41 
  -1 -13   2   17.07    0.41 
   1 -13  -2   16.69    0.46 
   1 -13  -2   16.90    0.48 
  -1 -13   2   16.53    0.50 
  -1 -13   2   16.81    0.38 
  -1 -13   2   17.41    0.48 
   1  13  -2   16.63    0.50 
  -1  13   2   16.71    0.52 
  -1  13   2   16.33    0.41 
   1  13  -2   16.61    0.41 
  -1  13   2   16.75    0.47 
   1  13  -2   16.83    0.46 
   0 -13  -2   11.13    0.26 
   0 -13  -2   11.15    0.32 
   0 -13   2   10.68    0.29 
   0 -13  -2   11.32    0.35 
   0 -13   2   11.48    0.37 
   0 -13   2   11.27    0.30 
   0 -13   2   10.95    0.40 
   0 -13   2   10.96    0.34 
   0 -13  -2   11.68    0.33 
   0  13  -2   11.01    0.35 
   0  13   2   11.18    0.38 
   0  13  -2   11.19    0.40 
   0  13  -2   11.47    0.31 
   0  13   2   11.01    0.35 
   0  13   2   11.05    0.35 
   0  13   2   11.13    0.26 
   0  13  -2   10.92    0.38 
   0  13  -2   11.18    0.30 
   0  13   2   10.95    0.27 
  -1 -13  -2  187.44    3.87 
   1 -13   2  190.62    3.68 
  -1 -13  -2  195.35    3.69 
   1 -13   2  188.48    4.08 
   1 -13   2  186.43    3.78 
   1 -13   2  191.07    4.04 
  -1 -13  -2  191.03    3.26 
   1 -13   2  193.52    3.31 
   1  13   2  191.24    4.00 
  -1  13  -2  186.88    3.67 
  -1  13  -2  191.96    4.10 
   1  13   2  188.56    3.79 
   1  13   2  192.23    4.03 
  -1  13  -2  186.85    3.80 
   1  13   2  186.71    3.69 
   1  13   2  192.21    3.27 
   2 -13   2    2.74    0.18 
   2 -13   2    2.64    0.23 
   2 -13   2    2.74    0.16 
  -2 -13  -2    2.83    0.18 
   2 -13   2    2.80    0.18 
  -2 -13  -2    2.87    0.14 
  -2 -13  -2    2.70    0.16 
  -2  13  -2    2.71    0.14 
  -2  13  -2    2.85    0.19 
  -2  13  -2    2.89    0.17 
   2  13   2    2.84    0.18 
   2  13   2    2.91    0.20 
   2  13   2    2.62    0.17 
   2  13   2    2.87    0.16 
   2  13   2    2.91    0.15 
  -3 -13  -2   41.65    0.93 
   3 -13   2   41.63    0.95 
  -3 -13  -2   41.10    0.81 
   3 -13   2   39.69    1.08 
   3 -13   2   41.39    0.92 
   3 -13   2   40.62    0.97 
   3  13   2   41.52    0.96 
   3  13   2   40.44    0.84 
  -3  13  -2   41.33    0.94 
   3  13   2   40.63    0.97 
  -3  13  -2   43.11    1.08 
   3  13   2   40.46    0.97 
   3  13   2   41.87    0.95 
  -3  13  -2   41.37    0.98 
   4 -13   2    1.76    0.24 
   4 -13   2    1.61    0.19 
   4 -13   2    1.51    0.16 
   4 -13   2    1.65    0.21 
  -4 -13  -2    1.77    0.16 
   4 -13   2    1.53    0.20 
   4  13   2    1.36    0.17 
  -4  13  -2    1.45    0.19 
   4  13   2    1.86    0.20 
  -4  13  -2    1.80    0.20 
  -4  13  -2    1.83    0.23 
   4  13   2    1.68    0.12 
   4  13   2    1.32    0.17 
   4  13   2    1.76    0.22 
  -5 -13  -2   62.24    1.23 
   5 -13   2   58.69    1.58 
   5 -13   2   63.23    1.41 
   5 -13   2   63.26    1.47 
   5 -13   2   63.22    1.41 
   5  13   2   62.65    1.28 
  -5  13  -2   63.90    1.47 
  -5  13  -2   63.60    1.39 
   5  13   2   62.22    1.44 
   5  13   2   65.21    1.34 
   5  13   2   62.88    1.40 
   5  13   2   62.03    1.44 
  -5  13  -2   64.53    1.56 
   6 -13   2    3.31    0.30 
   6 -13   2    2.95    0.30 
   6 -13   2    3.10    0.27 
   6 -13   2    2.54    0.34 
  -6  13  -2    3.08    0.29 
  -6  13  -2    3.24    0.33 
   6  13   2    2.14    0.25 
   6  13   2    2.80    0.27 
   6  13   2    3.11    0.23 
   6  13   2    2.80    0.27 
   6  13   2    2.94    0.32 
   7 -13   2   33.24    0.90 
   7 -13   2   32.90    0.97 
   7 -13   2   31.53    1.03 
   7 -13   2   32.87    0.91 
   7  13   2   33.40    0.95 
   7  13   2   31.90    0.85 
   7  13   2   30.84    0.93 
   7  13   2   33.28    0.85 
   7  13   2   32.00    0.87 
   7  13   2   31.57    0.91 
  -7  13  -2   30.33    0.93 
  -7  13  -2   31.76    0.96 
   8 -13   2   12.96    0.69 
   8 -13   2   12.95    0.58 
   8 -13   2   13.17    0.63 
   8  13   2   12.63    0.62 
   8  13   2   11.86    0.62 
   8  13   2   12.54    0.54 
   8  13   2   12.71    0.61 
   8  13   2   13.99    0.56 
   9 -13   2   34.87    0.96 
   9 -13   2   35.44    1.14 
   9 -13   2   32.65    1.19 
   9  13   2   32.38    1.09 
   9  13   2   30.97    1.04 
   9  13   2   31.77    1.08 
   9  13   2   36.48    1.04 
   9 -14  -2    5.78    0.62 
   9 -14  -2    5.47    0.56 
   9 -14  -2    7.19    0.51 
   9 -14  -2    5.48    0.51 
   9  14  -2    5.02    0.62 
   9  14  -2    5.64    0.59 
   9  14  -2    6.30    0.57 
   8 -14  -2    2.88    0.30 
   8 -14  -2    3.71    0.42 
  -8 -14   2    2.97    0.33 
   8 -14  -2    2.59    0.35 
   8 -14  -2    3.43    0.36 
   8  14  -2    3.56    0.37 
   8  14  -2    4.14    0.46 
   8  14  -2    2.66    0.36 
   7 -14  -2    4.57    0.41 
   7 -14  -2    5.48    0.34 
  -7 -14   2    4.24    0.28 
   7 -14  -2    5.35    0.45 
  -7 -14   2    4.69    0.32 
   7 -14  -2    4.52    0.39 
   7 -14  -2    4.59    0.31 
  -7  14   2    5.25    0.43 
   7  14  -2    4.81    0.40 
  -7  14   2    4.12    0.39 
   7  14  -2    4.60    0.42 
   7  14  -2    4.39    0.41 
   6 -14  -2    0.91    0.20 
   6 -14  -2    1.01    0.15 
  -6 -14   2    0.87    0.13 
   6 -14  -2    0.97    0.21 
   6  14  -2    0.84    0.19 
  -6  14   2    0.59    0.18 
   6  14  -2    1.02    0.20 
   6  14  -2    0.64    0.18 
  -5 -14   2   48.89    1.05 
   5 -14  -2   47.82    1.16 
  -5 -14   2   45.23    0.98 
  -5 -14   2   48.14    1.07 
   5 -14  -2   47.11    1.05 
  -5 -14   2   46.00    1.01 
   5 -14  -2   45.87    1.25 
   5  14  -2   46.83    1.04 
  -5  14   2   46.76    1.14 
  -5  14   2   48.14    1.27 
   5  14  -2   46.51    1.20 
   4 -14  -2    0.38    0.11 
  -4 -14   2    0.50    0.07 
   4 -14  -2    0.43    0.08 
   4 -14  -2    0.43    0.13 
  -4 -14   2    0.80    0.10 
  -4 -14   2    0.41    0.11 
  -4 -14   2    0.63    0.11 
   4 -14  -2    0.55    0.14 
  -4  14   2    0.39    0.15 
   4  14  -2    0.54    0.14 
  -4  14   2    0.54    0.13 
   4  14  -2    0.46    0.13 
  -4  14   2    0.42    0.12 
   4  14  -2    0.48    0.13 
   3 -14  -2    7.34    0.29 
  -3 -14   2    7.38    0.19 
   3 -14  -2    7.42    0.32 
  -3 -14   2    7.33    0.26 
   3 -14  -2    7.24    0.34 
  -3 -14   2    7.36    0.30 
  -3 -14   2    7.64    0.27 
   3 -14  -2    7.39    0.31 
  -3  14   2    7.37    0.31 
  -3  14   2    7.49    0.29 
   3  14  -2    7.44    0.33 
  -3  14   2    7.73    0.37 
   3  14  -2    7.17    0.28 
   2 -14  -2   61.12    1.39 
   2 -14  -2   58.86    1.29 
  -2 -14   2   60.51    1.15 
   2 -14  -2   59.90    1.28 
   2 -14  -2   60.79    1.09 
  -2 -14   2   61.66    1.36 
   2 -14  -2   59.67    1.40 
  -2 -14   2   63.13    1.24 
  -2 -14   2   60.13    1.39 
   2  14  -2   59.01    1.16 
  -2  14   2   58.19    1.50 
   2  14  -2   60.02    1.40 
  -2  14   2   58.64    1.29 
  -2  14   2   59.24    1.29 
   2  14  -2   56.62    1.29 
  -1 -14   2    0.80    0.12 
  -1 -14   2    0.67    0.12 
   1 -14  -2    0.75    0.11 
  -1 -14   2    0.70    0.10 
   1 -14  -2    0.82    0.10 
   1 -14  -2    0.66    0.07 
   1 -14  -2    0.64    0.10 
  -1 -14   2    0.65    0.10 
  -1 -14   2    0.74    0.08 
   1  14  -2    0.80    0.12 
   1  14  -2    0.96    0.12 
   1  14  -2    0.80    0.11 
  -1  14   2    0.62    0.12 
  -1  14   2    0.64    0.11 
  -1  14   2    0.71    0.09 
   0 -14  -2  114.16    2.01 
   0 -14   2  114.73    2.55 
   0 -14  -2  117.21    2.46 
   0 -14  -2  114.82    2.31 
   0 -14  -2  115.25    2.42 
   0 -14   2  116.97    2.31 
   0 -14   2  116.39    2.07 
   0 -14   2  113.26    2.32 
   0 -14  -2  117.10    2.45 
   0 -14   2  118.36    2.52 
   0  14   2  113.94    2.50 
   0  14  -2  114.72    2.07 
   0  14   2  114.14    2.54 
   0  14   2  114.21    2.29 
   0  14   2  117.40    2.02 
   0  14  -2  117.16    2.58 
   0  14  -2  114.96    2.35 
   0  14  -2  116.33    2.54 
   0  14   2  114.86    2.32 
   0  14  -2  114.74    2.31 
   1 -14   2    0.48    0.12 
   1 -14   2    0.30    0.08 
  -1 -14  -2    0.34    0.06 
  -1 -14  -2    0.52    0.07 
   1 -14   2    0.54    0.10 
  -1 -14  -2    0.25    0.08 
   1 -14   2    0.41    0.10 
  -1 -14  -2    0.41    0.07 
   1 -14   2    0.28    0.08 
   1  14   2    0.34    0.06 
   1  14   2    0.32    0.10 
   1  14   2    0.24    0.09 
  -1  14  -2    0.38    0.10 
   1  14   2    0.35    0.09 
   1  14   2    0.33    0.07 
  -1  14  -2    0.38    0.07 
  -2 -14  -2   98.56    2.02 
  -2 -14  -2   97.40    1.72 
   2 -14   2   96.97    2.16 
   2 -14   2   96.95    1.76 
  -2 -14  -2   98.98    1.97 
   2 -14   2   95.32    2.00 
   2 -14   2   91.98    2.19 
   2  14   2   96.40    2.09 
   2  14   2   94.77    1.99 
   2  14   2   96.29    2.12 
  -2  14  -2   97.99    2.21 
  -2  14  -2   95.07    1.95 
  -2  14  -2   96.79    2.01 
   2  14   2   95.46    1.98 
  -2  14  -2   93.81    1.97 
   2  14   2   94.75    1.73 
   3 -14   2    1.52    0.14 
  -3 -14  -2    1.20    0.15 
   3 -14   2    1.41    0.18 
  -3 -14  -2    1.58    0.14 
   3 -14   2    1.30    0.19 
   3 -14   2    1.70    0.23 
   3 -14   2    1.54    0.18 
  -3  14  -2    1.53    0.20 
   3  14   2    1.31    0.15 
  -3  14  -2    1.46    0.18 
   3  14   2    1.41    0.16 
  -3  14  -2    1.65    0.17 
   3  14   2    1.49    0.17 
   3  14   2    1.41    0.18 
   4 -14   2  164.67    3.29 
   4 -14   2  159.43    3.61 
   4 -14   2  166.99    3.42 
   4 -14   2  160.55    3.66 
   4 -14   2  166.80    3.38 
  -4 -14  -2  164.16    2.92 
   4  14   2  163.99    3.31 
   4  14   2  163.46    3.51 
   4  14   2  164.57    2.96 
   4  14   2  164.52    3.40 
  -4  14  -2  167.37    3.43 
  -4  14  -2  167.21    3.27 
  -4  14  -2  173.52    3.66 
   5 -14   2    2.31    0.25 
   5 -14   2    2.94    0.27 
   5 -14   2    2.74    0.22 
  -5 -14  -2    2.52    0.20 
   5 -14   2    2.77    0.31 
   5  14   2    2.79    0.26 
  -5  14  -2    2.36    0.26 
  -5  14  -2    2.74    0.29 
   5  14   2    2.37    0.22 
   5  14   2    3.00    0.18 
  -5  14  -2    2.55    0.25 
   5  14   2    2.48    0.29 
   5  14   2    2.56    0.24 
   6 -14   2   70.86    1.57 
   6 -14   2   66.62    1.75 
   6 -14   2   68.67    1.56 
   6 -14   2   67.81    1.63 
   6  14   2   68.29    1.54 
  -6  14  -2   68.57    1.62 
   6  14   2   67.96    1.43 
  -6  14  -2   71.95    1.71 
   6  14   2   68.17    1.62 
   6  14   2   66.24    1.59 
   6  14   2   67.62    1.60 
   6  14   2   70.13    1.49 
   7 -14   2   11.39    0.54 
   7 -14   2   10.61    0.47 
   7 -14   2   10.41    0.51 
   7 -14   2   10.56    0.59 
   7  14   2    9.61    0.54 
   7  14   2   10.98    0.43 
   7  14   2    9.80    0.45 
   7  14   2   10.45    0.50 
   7  14   2   10.02    0.51 
   7  14   2    9.96    0.48 
   8 -14   2   33.44    0.97 
   8 -14   2   32.96    1.13 
   8 -14   2   34.54    1.06 
   8  14   2   35.02    0.93 
  -8  14  -2   32.17    1.03 
   8  14   2   32.45    0.96 
   8  14   2   32.38    1.03 
   8  14   2   31.99    0.99 
   9 -14   2    1.29    0.39 
   9 -14   2    1.39    0.37 
   9 -14   2    1.19    0.30 
   9  14   2    1.48    0.39 
   9  14   2    1.23    0.36 
   9  14   2    1.17    0.35 
   9  14   2    1.77    0.37 
   9 -15  -2   10.49    0.59 
   9 -15  -2    9.52    0.72 
   9 -15  -2    9.19    0.66 
   9  15  -2   10.61    0.76 
   9  15  -2    9.64    0.67 
   9  15  -2    9.92    0.66 
   8 -15  -2    7.02    0.44 
   8 -15  -2    6.78    0.56 
   8 -15  -2    7.02    0.43 
  -8 -15   2    6.51    0.38 
   8 -15  -2    7.39    0.52 
   8  15  -2    7.14    0.54 
   8  15  -2    6.81    0.56 
   8  15  -2    6.74    0.51 
   7 -15  -2    5.65    0.35 
   7 -15  -2    5.88    0.33 
  -7 -15   2    5.12    0.29 
   7 -15  -2    5.91    0.43 
   7 -15  -2    5.83    0.47 
   7  15  -2    6.06    0.46 
  -7  15   2    5.40    0.42 
   7  15  -2    5.56    0.45 
  -7  15   2    6.14    0.47 
   7  15  -2    5.84    0.43 
   6 -15  -2    9.45    0.35 
   6 -15  -2    9.52    0.51 
   6 -15  -2    9.22    0.45 
  -6 -15   2    8.96    0.31 
  -6  15   2    9.61    0.45 
   6  15  -2    9.27    0.48 
   6  15  -2    9.49    0.44 
   6  15  -2   10.12    0.49 
  -5 -15   2    2.06    0.16 
  -5 -15   2    1.73    0.14 
   5 -15  -2    1.72    0.24 
  -5 -15   2    1.89    0.17 
   5 -15  -2    1.75    0.16 
   5 -15  -2    1.88    0.24 
  -5 -15   2    1.86    0.20 
   5  15  -2    1.62    0.22 
   5  15  -2    2.19    0.28 
  -5  15   2    1.86    0.25 
  -5  15   2    2.01    0.24 
   4 -15  -2   10.72    0.29 
  -4 -15   2   10.86    0.36 
   4 -15  -2   10.94    0.41 
  -4 -15   2   10.55    0.27 
  -4 -15   2   11.06    0.33 
  -4 -15   2   10.83    0.35 
   4 -15  -2   10.68    0.40 
   4 -15  -2   10.77    0.46 
   4  15  -2   10.38    0.42 
   4  15  -2   10.55    0.38 
  -4  15   2   10.19    0.47 
  -4  15   2   10.57    0.40 
   4  15  -2   10.35    0.43 
  -4  15   2   10.30    0.39 
   3 -15  -2    8.92    0.26 
  -3 -15   2    8.27    0.29 
   3 -15  -2    8.90    0.33 
   3 -15  -2    9.06    0.36 
   3 -15  -2    8.47    0.38 
   3 -15  -2    8.95    0.35 
  -3 -15   2    8.89    0.30 
  -3 -15   2    8.97    0.33 
   3  15  -2    8.51    0.36 
   3  15  -2    8.14    0.31 
  -3  15   2    8.21    0.34 
  -3  15   2    8.72    0.41 
   3  15  -2    8.46    0.37 
  -3  15   2    8.30    0.32 
  -2 -15   2    8.06    0.29 
  -2 -15   2    8.40    0.23 
  -2 -15   2    8.11    0.32 
  -2 -15   2    7.81    0.32 
  -2 -15   2    7.88    0.28 
   2 -15  -2    7.74    0.27 
   2 -15  -2    8.09    0.32 
   2 -15  -2    7.92    0.23 
   2 -15  -2    8.21    0.34 
   2 -15  -2    7.78    0.31 
  -2  15   2    7.33    0.32 
  -2  15   2    7.70    0.36 
   2  15  -2    8.29    0.34 
   2  15  -2    7.45    0.32 
  -2  15   2    7.45    0.27 
   2  15  -2    7.72    0.28 
  -1 -15   2  112.77    2.05 
   1 -15  -2  115.17    2.29 
   1 -15  -2  114.24    2.29 
   1 -15  -2  115.90    2.48 
  -1 -15   2  110.98    2.25 
  -1 -15   2  116.71    2.48 
  -1 -15   2  116.08    2.30 
   1 -15  -2  115.27    2.46 
  -1 -15   2  115.43    2.51 
   1 -15  -2  112.76    1.99 
  -1  15   2  111.56    2.30 
   1  15  -2  111.27    2.30 
   1  15  -2  112.23    2.51 
   1  15  -2  112.39    2.05 
  -1  15   2  113.22    2.30 
  -1  15   2  113.48    2.55 
   0 -15  -2   20.43    0.43 
   0 -15   2   20.64    0.56 
   0 -15  -2   21.34    0.54 
   0 -15  -2   21.02    0.53 
   0 -15   2   20.80    0.62 
   0 -15  -2   20.70    0.56 
   0 -15  -2   21.68    0.56 
   0 -15   2   20.67    0.48 
   0 -15   2   21.32    0.59 
   0 -15   2   20.26    0.48 
   0  15  -2   20.78    0.61 
   0  15  -2   20.73    0.64 
   0  15   2   20.16    0.46 
   0  15   2   20.86    0.62 
   0  15  -2   20.86    0.56 
   0  15   2   20.65    0.58 
   0  15   2   20.87    0.57 
   0  15  -2   20.43    0.49 
   1 -15   2   73.30    1.68 
   1 -15   2   74.64    1.55 
   1 -15   2   71.11    1.53 
  -1 -15  -2   75.90    1.56 
   1 -15   2   72.85    1.37 
  -1 -15  -2   72.48    1.59 
  -1 -15  -2   74.89    1.55 
  -1 -15  -2   73.19    1.55 
   1 -15   2   72.90    1.73 
  -1 -15  -2   73.66    1.33 
  -1  15  -2   76.28    1.75 
  -1  15  -2   72.16    1.54 
  -1  15  -2   73.36    1.52 
   1  15   2   72.14    1.65 
   1  15   2   71.81    1.55 
   1  15   2   75.04    1.51 
   1  15   2   72.99    1.33 
   1  15   2   73.47    1.69 
  -2 -15  -2    3.08    0.18 
  -2 -15  -2    2.89    0.15 
   2 -15   2    2.85    0.21 
   2 -15   2    2.81    0.25 
   2 -15   2    2.83    0.22 
   2 -15   2    2.83    0.19 
  -2 -15  -2    2.90    0.20 
  -2  15  -2    2.95    0.15 
   2  15   2    3.06    0.22 
   2  15   2    2.95    0.16 
  -2  15  -2    2.78    0.19 
  -2  15  -2    2.94    0.26 
  -2  15  -2    2.88    0.21 
   2  15   2    2.67    0.21 
   2  15   2    2.79    0.17 
   2  15   2    2.60    0.19 
   3 -15   2  262.76    4.50 
  -3 -15  -2  261.41    5.21 
   3 -15   2  260.08    5.17 
  -3 -15  -2  256.65    4.45 
   3 -15   2  256.43    5.50 
   3 -15   2  250.55    5.54 
   3 -15   2  256.56    5.18 
   3 -15   2  260.70    5.00 
   3  15   2  256.16    5.40 
   3  15   2  256.07    5.02 
  -3  15  -2  266.88    5.55 
   3  15   2  253.46    5.21 
   3  15   2  254.64    5.42 
   3  15   2  261.56    4.48 
  -3  15  -2  257.73    4.98 
   4 -15   2    2.87    0.19 
   4 -15   2    3.01    0.25 
  -4 -15  -2    3.11    0.20 
   4 -15   2    3.14    0.30 
   4 -15   2    3.32    0.25 
   4  15   2    2.93    0.27 
  -4  15  -2    2.87    0.29 
   4  15   2    3.17    0.23 
   4  15   2    3.05    0.21 
  -4  15  -2    3.20    0.25 
   4  15   2    3.15    0.22 
  -4  15  -2    3.26    0.25 
   5 -15   2  173.41    3.60 
   5 -15   2  175.05    3.54 
  -5 -15  -2  171.81    3.06 
   5 -15   2  165.76    3.83 
   5 -15   2  164.61    3.44 
   5  15   2  167.90    3.48 
   5  15   2  173.09    3.54 
   5  15   2  166.21    3.67 
  -5  15  -2  176.96    3.81 
   5  15   2  171.01    3.60 
   5  15   2  176.85    3.41 
  -5  15  -2  172.53    3.59 
   5  15   2  174.22    3.12 
   6 -15   2    0.30    0.18 
   6 -15   2    0.34    0.19 
   6 -15   2    0.36    0.16 
   6 -15   2    0.42    0.17 
   6  15   2    0.50    0.18 
   6  15   2    0.58    0.19 
   6  15   2    0.31    0.17 
  -6  15  -2    0.08    0.17 
   6  15   2    0.39    0.16 
   6  15   2    0.30    0.13 
   6  15   2    0.31    0.16 
   7 -15   2   85.17    2.19 
   7 -15   2   90.23    1.97 
   7 -15   2   89.38    2.06 
   7  15   2   82.33    2.02 
   7  15   2   86.67    1.80 
   7  15   2   85.08    1.99 
   7  15   2   84.09    1.91 
  -7  15  -2   90.10    2.13 
   7  15   2   85.81    2.03 
   7  15   2   90.46    1.88 
   8 -15   2    3.39    0.41 
   8 -15   2    3.96    0.46 
   8 -15   2    3.12    0.43 
   8  15   2    3.60    0.40 
   8  15   2    2.19    0.34 
   8  15   2    3.08    0.36 
  -8  15  -2    2.43    0.37 
   8  15   2    3.68    0.40 
   9 -15   2   23.28    0.79 
   9  15   2   22.18    0.92 
   9  15   2   22.09    0.90 
   9  15   2   19.59    0.90 
   9 -16  -2   38.68    1.04 
   9 -16  -2   36.82    1.22 
   9  16  -2   37.30    1.27 
   9  16  -2   36.79    1.18 
   8 -16  -2    0.13    0.22 
   8 -16  -2    0.08    0.27 
   8 -16  -2    0.16    0.23 
   8 -16  -2    0.34    0.26 
   8  16  -2    0.34    0.29 
   8  16  -2    0.04    0.29 
   8  16  -2    0.03    0.24 
   7 -16  -2   37.48    1.09 
   7 -16  -2   38.70    0.96 
   7 -16  -2   39.51    0.91 
  -7 -16   2   37.30    0.89 
   7 -16  -2   36.95    1.18 
   7  16  -2   37.82    1.11 
   7  16  -2   39.88    1.02 
   7  16  -2   38.96    1.13 
   6 -16  -2    1.29    0.17 
   6 -16  -2    1.33    0.25 
   6 -16  -2    1.16    0.21 
  -6 -16   2    1.22    0.19 
  -6 -16   2    1.24    0.17 
   6  16  -2    0.50    0.21 
   6  16  -2    1.18    0.23 
  -6  16   2    1.53    0.26 
  -6  16   2    1.39    0.23 
   5 -16  -2   83.38    1.71 
   5 -16  -2   79.21    1.97 
   5 -16  -2   80.96    1.83 
  -5 -16   2   84.05    1.74 
  -5 -16   2   85.31    1.75 
  -5 -16   2   78.95    1.57 
  -5 -16   2   79.89    1.65 
   5  16  -2   80.84    1.82 
  -5  16   2   79.20    1.82 
   5  16  -2   80.22    1.92 
  -5  16   2   80.22    1.77 
   5  16  -2   82.24    1.63 
   4 -16  -2    1.21    0.19 
  -4 -16   2    1.46    0.16 
  -4 -16   2    1.08    0.15 
   4 -16  -2    1.36    0.18 
  -4 -16   2    1.12    0.14 
   4 -16  -2    1.12    0.17 
   4 -16  -2    1.01    0.11 
   4  16  -2    1.15    0.19 
  -4  16   2    1.38    0.18 
   4  16  -2    1.02    0.18 
   4  16  -2    0.67    0.14 
  -4  16   2    1.14    0.18 
  -3 -16   2  135.53    2.45 
   3 -16  -2  136.75    2.99 
  -3 -16   2  138.99    2.93 
   3 -16  -2  137.11    2.40 
   3 -16  -2  135.46    2.80 
   3 -16  -2  134.50    2.75 
   3 -16  -2  135.46    3.01 
  -3 -16   2  139.23    2.91 
  -3  16   2  137.30    3.07 
  -3  16   2  136.24    2.75 
   3  16  -2  130.88    2.76 
  -3  16   2  134.82    2.81 
   3  16  -2  134.48    2.99 
   3  16  -2  135.74    2.48 
  -2 -16   2    0.34    0.09 
   2 -16  -2    0.28    0.11 
   2 -16  -2    0.47    0.12 
  -2 -16   2    0.46    0.09 
  -2 -16   2    0.34    0.11 
   2 -16  -2    0.48    0.10 
  -2 -16   2    0.44    0.07 
  -2 -16   2    0.29    0.11 
   2 -16  -2    0.30    0.08 
  -2  16   2    0.13    0.11 
   2  16  -2    0.33    0.10 
   2  16  -2    0.25    0.11 
  -2  16   2    0.32    0.10 
   2  16  -2    0.32    0.12 
  -2  16   2    0.04    0.12 
  -1 -16   2   42.74    1.01 
  -1 -16   2   40.46    0.85 
   1 -16  -2   41.65    0.79 
   1 -16  -2   42.29    0.90 
  -1 -16   2   41.01    1.04 
   1 -16  -2   42.42    0.99 
   1 -16  -2   41.32    0.96 
   1 -16  -2   42.11    1.01 
  -1  16   2   41.64    0.97 
   1  16  -2   40.52    0.96 
  -1  16   2   41.82    1.09 
  -1  16   2   41.23    0.91 
   1  16  -2   39.46    0.84 
   1  16  -2   40.34    1.04 
   0 -16   2    8.28    0.25 
   0 -16   2    8.14    0.36 
   0 -16   2    8.56    0.32 
   0 -16  -2    8.09    0.27 
   0 -16  -2    8.05    0.23 
   0 -16  -2    8.60    0.32 
   0 -16  -2    8.48    0.29 
   0 -16   2    8.01    0.28 
   0 -16  -2    8.61    0.32 
   0  16  -2    8.19    0.35 
   0  16  -2    8.31    0.25 
   0  16  -2    8.07    0.32 
   0  16  -2    8.47    0.38 
   0  16   2    8.43    0.36 
   0  16   2    8.05    0.22 
   0  16   2    8.44    0.33 
  -1 -16  -2   37.85    0.91 
   1 -16   2   38.35    0.87 
   1 -16   2   38.58    1.03 
   1 -16   2   39.66    0.92 
  -1 -16  -2   39.16    0.86 
  -1 -16  -2   41.02    0.87 
  -1 -16  -2   38.79    0.76 
   1 -16   2   38.20    0.98 
  -1 -16  -2   39.13    0.92 
  -1  16  -2   38.08    0.84 
   1  16   2   39.03    0.96 
   1  16   2   39.01    0.77 
   1  16   2   39.22    0.83 
  -1  16  -2   39.94    1.05 
   1  16   2   38.90    1.00 
  -1  16  -2   39.33    0.91 
   1  16   2   38.58    0.93 
  -2 -16  -2   21.71    0.48 
   2 -16   2   22.25    0.61 
   2 -16   2   21.58    0.69 
   2 -16   2   22.49    0.53 
   2 -16   2   21.09    0.57 
  -2 -16  -2   22.09    0.57 
  -2 -16  -2   22.74    0.60 
   2 -16   2   21.81    0.65 
   2  16   2   21.52    0.50 
   2  16   2   22.22    0.64 
  -2  16  -2   21.49    0.59 
  -2  16  -2   22.88    0.71 
   2  16   2   21.23    0.62 
   2  16   2   22.20    0.54 
   2  16   2   21.52    0.60 
  -2  16  -2   21.16    0.52 
  -2  16  -2   21.94    0.58 
   3 -16   2   61.00    1.19 
   3 -16   2   59.75    1.48 
   3 -16   2   59.80    1.36 
   3 -16   2   60.63    1.34 
  -3 -16  -2   60.83    1.15 
   3 -16   2   59.45    1.52 
  -3 -16  -2   62.73    1.32 
  -3  16  -2   59.37    1.39 
   3  16   2   60.22    1.18 
   3  16   2   59.61    1.39 
   3  16   2   59.98    1.37 
  -3  16  -2   61.77    1.52 
   3  16   2   59.83    1.34 
  -3  16  -2   60.71    1.33 
   3  16   2   60.04    1.41 
   4 -16   2   33.37    0.87 
   4 -16   2   33.80    0.80 
  -4 -16  -2   32.65    0.72 
   4 -16   2   33.47    0.86 
   4  16   2   33.75    0.86 
   4  16   2   32.72    0.76 
   4  16   2   32.64    0.84 
  -4  16  -2   35.78    0.99 
   4  16   2   32.58    0.88 
  -4  16  -2   33.32    0.84 
  -4  16  -2   33.73    0.88 
   5 -16   2    0.73    0.16 
   5 -16   2    1.07    0.16 
   5 -16   2    0.68    0.20 
  -5 -16  -2    0.71    0.14 
   5  16   2    0.87    0.20 
   5  16   2    0.82    0.18 
  -5  16  -2    0.94    0.20 
   5  16   2    0.53    0.15 
   5  16   2    0.89    0.18 
  -5  16  -2    0.80    0.18 
  -5  16  -2    0.70    0.16 
   5  16   2    0.87    0.15 
   6 -16   2   16.43    0.70 
   6 -16   2   18.00    0.65 
   6 -16   2   17.81    0.56 
   6 -16   2   18.01    0.63 
   6 -16   2   16.66    0.66 
   6  16   2   16.93    0.58 
   6  16   2   17.20    0.61 
   6  16   2   16.70    0.59 
   6  16   2   17.65    0.54 
   6  16   2   18.05    0.48 
  -6  16  -2   17.93    0.64 
   6  16   2   16.95    0.65 
   7 -16   2   22.06    0.71 
   7 -16   2   22.07    0.86 
   7 -16   2   23.40    0.81 
   7  16   2   21.93    0.79 
   7  16   2   21.77    0.78 
   7  16   2   23.10    0.74 
   7  16   2   21.95    0.75 
  -7  16  -2   22.51    0.83 
   7  16   2   23.49    0.64 
   7  16   2   21.43    0.66 
   8 -16   2    7.12    0.61 
   8 -16   2    7.02    0.55 
   8 -16   2    6.85    0.50 
   8  16   2    7.19    0.46 
   8  16   2    7.45    0.57 
   8  16   2    6.25    0.56 
   8 -17  -2   55.43    1.24 
   8 -17  -2   53.33    1.59 
   8 -17  -2   55.21    1.49 
   8  17  -2   54.73    1.54 
   8  17  -2   54.26    1.36 
   8  17  -2   53.53    1.49 
   7 -17  -2   11.83    0.45 
   7 -17  -2   11.01    0.56 
   7 -17  -2   10.19    0.61 
   7 -17  -2   12.18    0.47 
  -7 -17   2   11.41    0.39 
   7  17  -2   11.30    0.61 
   7  17  -2   12.12    0.57 
   7  17  -2   10.62    0.60 
   6 -17  -2   69.96    1.65 
   6 -17  -2   72.11    1.52 
  -6 -17   2   67.83    1.44 
  -6 -17   2   67.77    1.41 
   6 -17  -2   69.33    1.79 
  -6  17   2   67.67    1.64 
   6  17  -2   68.94    1.66 
  -6  17   2   70.07    1.80 
   6  17  -2   70.99    1.49 
   6  17  -2   68.77    1.73 
   5 -17  -2    2.67    0.28 
   5 -17  -2    2.28    0.32 
   5 -17  -2    1.85    0.17 
  -5  17   2    1.59    0.21 
   5  17  -2    2.03    0.25 
   5  17  -2    2.82    0.30 
  -5  17   2    2.16    0.26 
   5  17  -2    2.31    0.27 
  -4 -17   2  101.65    1.91 
   4 -17  -2  100.35    2.34 
   4 -17  -2  103.23    2.38 
  -4 -17   2  105.19    2.22 
  -4 -17   2  104.31    2.20 
   4 -17  -2  101.34    2.19 
   4  17  -2  101.56    1.95 
  -4  17   2  101.60    2.15 
   4  17  -2  101.99    2.34 
   4  17  -2   99.65    2.18 
  -4  17   2  101.85    2.20 
  -3 -17   2   23.86    0.62 
   3 -17  -2   23.34    0.69 
   3 -17  -2   23.35    0.52 
   3 -17  -2   23.59    0.63 
  -3 -17   2   24.31    0.65 
   3 -17  -2   24.08    0.73 
  -3 -17   2   23.20    0.57 
  -3  17   2   23.41    0.64 
  -3  17   2   23.73    0.66 
   3  17  -2   23.00    0.68 
   3  17  -2   22.93    0.60 
  -3  17   2   23.94    0.77 
   3  17  -2   23.32    0.71 
  -2 -17   2   86.70    1.89 
   2 -17  -2   84.30    1.53 
   2 -17  -2   83.46    1.79 
   2 -17  -2   85.91    1.94 
   2 -17  -2   85.98    1.92 
  -2 -17   2   86.00    1.75 
  -2 -17   2   86.79    1.80 
  -2 -17   2   85.04    1.92 
   2 -17  -2   85.73    1.78 
  -2 -17   2   83.82    1.59 
  -2  17   2   83.95    1.79 
  -2  17   2   86.52    2.03 
  -2  17   2   83.24    1.80 
   2  17  -2   83.81    1.95 
   2  17  -2   82.56    1.60 
   2  17  -2   83.02    1.80 
   1 -17  -2    6.76    0.30 
   1 -17  -2    6.34    0.21 
   1 -17  -2    6.26    0.27 
  -1 -17   2    6.47    0.28 
   1 -17  -2    6.29    0.22 
  -1 -17   2    6.17    0.29 
   1 -17  -2    6.10    0.29 
  -1 -17   2    6.29    0.25 
  -1 -17   2    6.02    0.31 
  -1  17   2    5.92    0.30 
  -1  17   2    6.04    0.23 
   1  17  -2    6.20    0.26 
   1  17  -2    6.51    0.30 
   1  17  -2    6.22    0.33 
  -1  17   2    6.62    0.35 
   0 -17   2   49.49    1.07 
   0 -17  -2   51.70    1.18 
   0 -17  -2   52.50    1.17 
   0 -17  -2   51.15    1.15 
   0 -17   2   51.37    1.15 
   0 -17   2   50.50    1.27 
   0 -17   2   51.67    1.01 
   0 -17   2   50.58    1.22 
   0 -17  -2   51.61    1.16 
   0 -17  -2   51.22    0.96 
   0  17  -2   50.83    1.30 
   0  17   2   50.21    1.16 
   0  17  -2   49.36    1.14 
   0  17  -2   49.96    1.25 
   0  17  -2   51.08    1.09 
  -1 -17  -2    0.53    0.08 
   1 -17   2    0.31    0.10 
   1 -17   2    0.62    0.13 
   1 -17   2    0.51    0.09 
  -1 -17  -2    0.22    0.10 
  -1 -17  -2    0.52    0.09 
   1 -17   2    0.49    0.15 
  -1 -17  -2    0.61    0.12 
   1 -17   2    0.36    0.10 
  -1 -17  -2    0.49    0.07 
   1  17   2    0.42    0.14 
   1  17   2    0.50    0.10 
  -1  17  -2    0.46    0.15 
   1  17   2    0.43    0.07 
  -1  17  -2    0.48    0.11 
  -1  17  -2    0.56    0.09 
   2 -17   2   10.03    0.38 
  -2 -17  -2    9.93    0.34 
   2 -17   2    9.85    0.33 
  -2 -17  -2    9.65    0.29 
  -2 -17  -2    9.76    0.37 
   2 -17   2   10.12    0.44 
   2 -17   2    9.44    0.40 
   2 -17   2    9.35    0.33 
  -2  17  -2    9.96    0.46 
   2  17   2   10.15    0.40 
  -2  17  -2    9.48    0.37 
   2  17   2   10.05    0.37 
   2  17   2    9.89    0.40 
   2  17   2    9.75    0.31 
  -2  17  -2    9.64    0.29 
   2  17   2    9.57    0.30 
  -3 -17  -2    7.14    0.28 
   3 -17   2    6.77    0.33 
   3 -17   2    7.25    0.29 
   3 -17   2    7.05    0.36 
   3 -17   2    7.00    0.32 
   3 -17   2    6.76    0.40 
  -3  17  -2    6.80    0.33 
  -3  17  -2    7.14    0.40 
   3  17   2    7.10    0.36 
   3  17   2    6.86    0.33 
   3  17   2    6.84    0.29 
  -3  17  -2    7.18    0.33 
   3  17   2    6.82    0.28 
   3  17   2    7.04    0.32 
   4 -17   2    0.17    0.12 
   4 -17   2    0.28    0.13 
   4 -17   2    0.14    0.10 
  -4 -17  -2    0.04    0.10 
   4 -17   2    0.03    0.15 
   4 -17   2   -0.12    0.11 
   4  17   2    0.33    0.13 
  -4  17  -2   -0.05    0.13 
   4  17   2    0.19    0.13 
   4  17   2    0.26    0.14 
  -4  17  -2    0.14    0.16 
   4  17   2    0.06    0.14 
   5 -17   2    2.06    0.29 
   5 -17   2    2.50    0.22 
  -5 -17  -2    2.51    0.23 
   5 -17   2    2.34    0.30 
   5 -17   2    2.64    0.29 
   5  17   2    2.44    0.29 
  -5  17  -2    2.65    0.28 
  -5  17  -2    2.44    0.27 
   5  17   2    2.25    0.27 
   5  17   2    2.46    0.27 
   5  17   2    2.68    0.32 
   6 -17   2    7.54    0.45 
   6 -17   2    8.25    0.38 
   6 -17   2    6.83    0.50 
   6 -17   2    8.99    0.47 
  -6  17  -2    8.07    0.46 
   6  17   2    7.90    0.44 
  -6  17  -2    8.15    0.51 
   6  17   2    7.82    0.42 
   6  17   2    7.81    0.47 
   6  17   2    7.90    0.42 
   7 -17   2    0.68    0.27 
   7 -17   2   -0.12    0.22 
   7 -17   2    0.24    0.21 
   7  17   2    0.29    0.23 
   7  17   2    0.27    0.24 
  -7  17  -2   -0.02    0.27 
   7  17   2    0.13    0.17 
   7  17   2    0.37    0.24 
   7  17   2   -0.04    0.26 
   7  17   2    0.47    0.19 
   8 -17   2   14.55    0.67 
   8 -17   2   14.90    0.71 
   8 -17   2   14.14    0.77 
   8  17   2   13.35    0.69 
   8  17   2   13.01    0.69 
   8  17   2   14.12    0.73 
   8 -18  -2    7.32    0.49 
   8 -18  -2    7.78    0.65 
   8 -18  -2    7.14    0.56 
   8  18  -2    7.60    0.61 
   8  18  -2    7.28    0.61 
   8  18  -2    7.59    0.64 
   7 -18  -2   76.45    1.50 
  -7 -18   2   71.71    1.54 
   7 -18  -2   72.59    1.93 
   7 -18  -2   72.40    1.79 
   7 -18  -2   76.74    1.64 
   7  18  -2   71.20    1.79 
   7  18  -2   71.72    1.61 
   7  18  -2   71.54    1.86 
   6 -18  -2    0.03    0.13 
  -6 -18   2    0.28    0.17 
   6 -18  -2   -0.08    0.19 
   6 -18  -2    0.25    0.22 
   6  18  -2    0.13    0.21 
  -6  18   2    0.30    0.17 
   6  18  -2    0.61    0.23 
   6  18  -2    0.10    0.19 
  -6  18   2   -0.01    0.20 
   5 -18  -2   57.80    1.55 
   5 -18  -2   60.69    1.26 
   5 -18  -2   60.60    1.56 
   5  18  -2   59.23    1.44 
  -5  18   2   60.57    1.40 
   5  18  -2   58.96    1.28 
  -5  18   2   58.25    1.42 
  -4 -18   2   12.61    0.42 
  -4 -18   2   13.30    0.39 
  -4 -18   2   13.40    0.41 
   4 -18  -2   12.87    0.46 
   4 -18  -2   13.16    0.51 
  -4  18   2   13.27    0.49 
   4  18  -2   13.19    0.52 
  -4  18   2   12.58    0.47 
   4  18  -2   13.07    0.52 
   3 -18  -2   70.45    1.31 
   3 -18  -2   71.16    1.66 
  -3 -18   2   71.80    1.60 
  -3 -18   2   70.93    1.57 
   3 -18  -2   68.52    1.53 
   3 -18  -2   69.57    1.68 
  -3 -18   2   67.87    1.36 
   3  18  -2   68.92    1.39 
   3  18  -2   68.85    1.67 
  -3  18   2   69.88    1.75 
   2 -18  -2   13.53    0.48 
   2 -18  -2   12.80    0.45 
  -2 -18   2   13.18    0.38 
  -2 -18   2   13.31    0.43 
   2 -18  -2   13.25    0.46 
   2 -18  -2   13.15    0.39 
   2 -18  -2   12.96    0.34 
  -2 -18   2   13.51    0.36 
  -2 -18   2   13.43    0.47 
  -2 -18   2   12.96    0.45 
   2  18  -2   13.37    0.47 
  -2  18   2   13.65    0.54 
   2  18  -2   12.66    0.48 
  -2  18   2   12.86    0.40 
   2  18  -2   13.11    0.41 
  -2  18   2   12.64    0.46 
  -1 -18   2   90.23    1.90 
   1 -18  -2   92.26    2.03 
   1 -18  -2   89.89    1.90 
  -1 -18   2   91.35    2.07 
   1 -18  -2   90.64    1.85 
   1 -18  -2   91.47    2.01 
  -1 -18   2   89.68    2.04 
   1 -18  -2   89.83    1.62 
  -1 -18   2   89.47    1.68 
   1  18  -2   88.44    1.69 
   1  18  -2   88.77    1.91 
  -1  18   2   91.68    2.13 
  -1  18   2   91.22    1.86 
   1  18  -2   90.77    2.08 
  -1  18   2   90.22    1.91 
   0 -18   2  104.29    2.18 
   0 -18  -2  108.44    2.33 
   0 -18  -2  108.35    2.23 
   0 -18   2  110.36    2.24 
   0 -18   2  108.04    2.45 
   0 -18   2  107.50    1.98 
   0 -18   2  110.18    2.41 
   0 -18  -2  108.02    2.32 
   0 -18  -2  110.49    2.34 
   0 -18  -2  108.46    1.92 
   0  18  -2  109.05    2.24 
   0  18  -2  108.22    2.21 
   0  18  -2  109.59    2.50 
   0  18   2  108.28    2.48 
   0  18   2  103.89    2.23 
   0  18  -2  109.03    2.45 
   1 -18   2   52.92    1.21 
   1 -18   2   52.93    1.35 
   1 -18   2   51.23    1.15 
  -1 -18  -2   53.62    1.02 
  -1 -18  -2   54.34    1.22 
  -1 -18  -2   55.40    1.17 
  -1 -18  -2   53.56    1.22 
   1 -18   2   53.11    1.07 
  -1 -18  -2   53.81    1.16 
   1 -18   2   54.00    1.31 
   1  18   2   53.45    1.23 
   1  18   2   55.02    1.29 
   1  18   2   54.07    1.11 
   1  18   2   52.87    1.36 
  -1  18  -2   54.92    1.39 
  -1  18  -2   53.03    1.13 
   1  18   2   52.76    1.02 
  -1  18  -2   53.10    1.21 
   2 -18   2  114.53    2.36 
   2 -18   2  113.88    2.37 
  -2 -18  -2  116.99    2.41 
  -2 -18  -2  116.09    2.05 
   2 -18   2  112.60    2.62 
  -2 -18  -2  115.97    2.36 
   2 -18   2  116.16    2.58 
   2 -18   2  116.19    2.10 
   2  18   2  114.17    2.07 
   2  18   2  114.77    2.52 
   2  18   2  113.70    2.35 
  -2  18  -2  110.50    2.33 
   2  18   2  112.02    2.37 
   2  18   2  114.23    2.57 
  -2  18  -2  114.54    2.35 
   3 -18   2    6.45    0.29 
   3 -18   2    6.62    0.31 
  -3 -18  -2    6.68    0.28 
   3 -18   2    6.10    0.33 
   3 -18   2    6.46    0.36 
  -3 -18  -2    6.26    0.25 
  -3  18  -2    6.66    0.32 
   3  18   2    6.24    0.31 
  -3  18  -2    6.31    0.33 
   3  18   2    6.14    0.33 
   3  18   2    6.32    0.28 
   3  18   2    6.53    0.29 
   4 -18   2   34.24    0.91 
  -4 -18  -2   35.24    0.76 
   4 -18   2   34.07    0.91 
   4 -18   2   34.71    0.80 
   4 -18   2   34.34    1.04 
   4  18   2   34.80    0.81 
   4  18   2   34.58    0.91 
  -4  18  -2   35.70    0.93 
  -4  18  -2   34.61    0.89 
   4  18   2   34.52    0.94 
   4  18   2   33.85    0.87 
   5 -18   2    2.38    0.31 
   5 -18   2    2.66    0.23 
   5 -18   2    2.43    0.31 
  -5 -18  -2    2.30    0.24 
   5 -18   2    2.10    0.29 
  -5  18  -2    1.64    0.26 
   5  18   2    2.41    0.29 
   5  18   2    2.46    0.29 
  -5  18  -2    2.28    0.25 
   5  18   2    2.37    0.27 
  -5  18  -2    2.44    0.31 
  -6 -18  -2   21.59    0.60 
   6 -18   2   22.26    0.85 
   6 -18   2   22.44    0.76 
   6 -18   2   23.34    0.66 
   6  18   2   22.18    0.73 
  -6  18  -2   21.34    0.75 
   6  18   2   20.51    0.76 
   6  18   2   22.18    0.70 
  -6  18  -2   22.89    0.84 
   6  18   2   21.05    0.71 
   7 -18   2    1.34    0.31 
   7 -18   2    1.21    0.29 
   7 -18   2    1.20    0.26 
   7  18   2    1.05    0.29 
   7  18   2    1.19    0.28 
   7  18   2    1.50    0.31 
   8 -18   2   36.75    1.16 
   8 -18   2   32.52    1.20 
   8  18   2   35.60    1.06 
   8  18   2   32.84    1.09 
   8  18   2   33.28    1.12 
   8 -19  -2    0.27    0.27 
   8 -19  -2    0.98    0.34 
   8 -19  -2    0.27    0.31 
   8  19  -2    0.29    0.30 
   8  19  -2    0.63    0.34 
   8  19  -2    0.53    0.37 
   7 -19  -2    0.71    0.29 
   7 -19  -2    0.28    0.24 
   7  19  -2    0.65    0.27 
   7  19  -2    0.51    0.30 
   7  19  -2    0.52    0.29 
   6 -19  -2    2.74    0.36 
   6 -19  -2    2.48    0.33 
   6 -19  -2    2.64    0.23 
  -6  19   2    2.86    0.39 
  -6  19   2    3.01    0.36 
   6  19  -2    2.22    0.29 
   6  19  -2    2.88    0.32 
   6  19  -2    2.37    0.31 
   5 -19  -2    1.46    0.24 
  -5 -19   2    1.56    0.20 
   5 -19  -2    1.69    0.24 
   5 -19  -2    1.29    0.25 
   5  19  -2    1.78    0.27 
  -5  19   2    1.87    0.26 
  -5  19   2    1.52    0.22 
   5  19  -2    1.39    0.25 
   5  19  -2    1.56    0.23 
  -4 -19   2    2.75    0.20 
  -4 -19   2    2.72    0.22 
   4 -19  -2    2.24    0.21 
   4 -19  -2    2.65    0.33 
  -4 -19   2    2.66    0.25 
   4 -19  -2    2.16    0.25 
   4 -19  -2    2.79    0.30 
   4  19  -2    2.43    0.25 
  -4  19   2    2.14    0.27 
   4  19  -2    2.65    0.32 
   4  19  -2    2.64    0.31 
  -4  19   2    2.85    0.29 
  -3 -19   2   19.47    0.57 
   3 -19  -2   20.67    0.66 
   3 -19  -2   19.42    0.63 
   3 -19  -2   19.49    0.47 
  -3 -19   2   19.79    0.54 
   3 -19  -2   19.43    0.56 
  -3 -19   2   19.31    0.52 
  -3  19   2   17.98    0.60 
   3  19  -2   18.02    0.54 
   3  19  -2   19.09    0.62 
   3  19  -2   19.09    0.64 
  -3  19   2   19.24    0.71 
   2 -19  -2    3.19    0.18 
   2 -19  -2    3.56    0.25 
  -2 -19   2    3.33    0.18 
   2 -19  -2    3.34    0.28 
  -2 -19   2    3.43    0.27 
   2 -19  -2    3.39    0.21 
  -2 -19   2    3.66    0.23 
  -2 -19   2    3.25    0.21 
  -2 -19   2    2.91    0.24 
   2  19  -2    3.02    0.28 
  -2  19   2    3.45    0.34 
   2  19  -2    3.04    0.28 
  -2  19   2    3.49    0.22 
   2  19  -2    3.18    0.24 
   1 -19  -2   78.96    1.76 
  -1 -19   2   76.52    1.79 
   1 -19  -2   77.68    1.41 
  -1 -19   2   77.56    1.76 
   1 -19  -2   78.44    1.74 
   1 -19  -2   77.80    1.59 
  -1 -19   2   75.67    1.66 
  -1 -19   2   76.86    1.47 
   1 -19  -2   79.75    1.75 
   1  19  -2   73.78    1.47 
   1  19  -2   76.39    1.82 
  -1  19   2   76.06    1.60 
  -1  19   2   75.02    1.67 
  -1  19   2   78.40    1.88 
   1  19  -2   73.45    1.66 
   0 -19  -2    1.76    0.17 
   0 -19   2    1.67    0.21 
   0 -19   2    1.41    0.13 
   0 -19  -2    1.87    0.22 
   0 -19  -2    1.75    0.15 
   0 -19   2    2.13    0.22 
   0 -19   2    1.43    0.20 
   0 -19  -2    1.88    0.19 
   0 -19  -2    1.83    0.22 
   0 -19   2    1.72    0.19 
   0  19  -2    2.00    0.23 
   0  19  -2    1.77    0.22 
   0  19   2    1.85    0.23 
   0  19  -2    1.47    0.14 
   0  19  -2    1.56    0.23 
   0  19   2    1.62    0.22 
  -1 -19  -2  163.81    3.39 
   1 -19   2  166.32    3.28 
  -1 -19  -2  164.64    2.86 
   1 -19   2  165.32    3.56 
  -1 -19  -2  161.92    3.27 
   1 -19   2  158.38    3.28 
  -1 -19  -2  170.40    3.41 
  -1 -19  -2  166.00    3.40 
   1 -19   2  163.50    2.92 
   1 -19   2  164.66    3.61 
  -1  19  -2  164.67    3.27 
  -1  19  -2  157.35    3.27 
   1  19   2  163.31    3.54 
   1  19   2  165.44    3.60 
  -1  19  -2  157.59    3.64 
   1  19   2  160.95    2.87 
   1  19   2  159.23    3.28 
   2 -19   2    2.10    0.24 
   2 -19   2    2.57    0.25 
   2 -19   2    2.05    0.20 
  -2 -19  -2    2.68    0.19 
  -2 -19  -2    2.48    0.21 
   2 -19   2    2.15    0.30 
   2 -19   2    2.13    0.21 
   2  19   2    2.33    0.20 
   2  19   2    2.32    0.16 
   2  19   2    1.94    0.25 
   2  19   2    2.39    0.24 
  -2  19  -2    2.18    0.25 
  -3 -19  -2   38.93    0.82 
   3 -19   2   39.39    1.13 
   3 -19   2   41.13    0.88 
   3 -19   2   38.94    0.97 
  -3 -19  -2   41.32    0.94 
   3 -19   2   39.09    1.10 
   3 -19   2   39.60    1.00 
   3  19   2   40.11    0.94 
   3  19   2   39.25    1.02 
  -3  19  -2   40.33    0.99 
   3  19   2   39.74    1.02 
   3  19   2   40.53    0.86 
   3  19   2   37.92    1.04 
  -3  19  -2   40.29    0.99 
   4 -19   2    2.82    0.36 
   4 -19   2    2.89    0.28 
   4 -19   2    3.06    0.30 
   4 -19   2    2.97    0.26 
   4 -19   2    3.08    0.31 
  -4 -19  -2    2.76    0.22 
  -4  19  -2    3.09    0.30 
   4  19   2    2.40    0.29 
  -4  19  -2    2.54    0.29 
   4  19   2    2.71    0.25 
   4  19   2    3.24    0.33 
   4  19   2    2.55    0.24 
  -4  19  -2    2.86    0.36 
   5 -19   2   71.46    1.93 
  -5 -19  -2   76.70    1.51 
   5 -19   2   79.14    1.69 
   5 -19   2   79.36    1.80 
   5 -19   2   74.59    1.75 
   5 -19   2   78.18    1.98 
  -5  19  -2   79.01    1.73 
  -5  19  -2   77.83    1.81 
   5  19   2   77.33    1.77 
   5  19   2   78.00    1.82 
  -5  19  -2   80.84    1.97 
   5  19   2   76.48    1.79 
   5  19   2   76.55    1.57 
  -6 -19  -2    5.39    0.36 
   6 -19   2    5.37    0.35 
   6 -19   2    6.13    0.51 
   6 -19   2    5.68    0.45 
   6  19   2    5.52    0.44 
   6  19   2    4.92    0.41 
   6  19   2    5.32    0.46 
  -6  19  -2    4.73    0.44 
   6  19   2    4.95    0.42 
  -6  19  -2    5.22    0.40 
   7 -19   2   42.73    1.37 
   7 -19   2   44.36    1.26 
   7 -19   2   45.34    1.15 
   7  19   2   43.53    1.14 
   7  19   2   42.60    1.25 
   8 -19   2    0.33    0.34 
   8  19   2    0.19    0.36 
   8  19   2    0.73    0.34 
   8  19   2   -0.06    0.36 
   8 -20  -2    6.75    0.59 
   8 -20  -2    5.71    0.52 
   8  20  -2    6.30    0.70 
   8  20  -2    6.09    0.55 
   7 -20  -2   10.81    0.68 
   7 -20  -2   11.44    0.62 
   7  20  -2   11.85    0.67 
   7  20  -2   12.14    0.65 
   7  20  -2   11.44    0.68 
   6 -20  -2    0.82    0.14 
   6 -20  -2    0.36    0.23 
   6 -20  -2    0.45    0.24 
   6  20  -2    0.44    0.25 
   6  20  -2    0.34    0.24 
  -6  20   2    0.41    0.22 
  -6  20   2   -0.01    0.24 
   6  20  -2    0.28    0.24 
   5 -20  -2    3.05    0.40 
   5 -20  -2    2.89    0.35 
   5 -20  -2    2.31    0.27 
   5 -20  -2    2.56    0.32 
  -5 -20   2    2.99    0.30 
   5  20  -2    3.11    0.38 
   5  20  -2    2.55    0.28 
  -5  20   2    3.17    0.33 
  -5  20   2    2.71    0.34 
   5  20  -2    2.67    0.31 
   4 -20  -2    8.37    0.32 
  -4 -20   2    8.38    0.32 
   4 -20  -2    8.58    0.38 
  -4 -20   2    8.44    0.30 
   4 -20  -2    8.32    0.47 
   4  20  -2    7.89    0.45 
  -4  20   2    7.83    0.41 
   4  20  -2    7.66    0.40 
  -4  20   2    7.77    0.40 
   4  20  -2    8.25    0.45 
  -3 -20   2   13.41    0.43 
   3 -20  -2   13.09    0.53 
   3 -20  -2   13.12    0.38 
   3 -20  -2   13.16    0.51 
   3 -20  -2   12.77    0.44 
  -3 -20   2   12.96    0.42 
  -3 -20   2   14.01    0.46 
   3  20  -2   12.49    0.51 
   3  20  -2   13.31    0.49 
  -3  20   2   13.57    0.60 
  -3  20   2   13.10    0.50 
  -3  20   2   12.70    0.46 
  -2 -20   2   18.39    0.57 
   2 -20  -2   18.13    0.44 
   2 -20  -2   19.18    0.58 
  -2 -20   2   17.99    0.46 
  -2 -20   2   17.76    0.58 
  -2 -20   2   17.98    0.49 
   2 -20  -2   17.82    0.59 
   2 -20  -2   17.86    0.50 
   2  20  -2   17.73    0.62 
   2  20  -2   17.51    0.51 
  -2  20   2   17.68    0.51 
   2  20  -2   17.87    0.59 
  -2  20   2   17.65    0.68 
  -2  20   2   17.21    0.58 
   1 -20  -2   15.51    0.39 
  -1 -20   2   15.54    0.44 
  -1 -20   2   15.32    0.51 
  -1 -20   2   15.48    0.52 
  -1 -20   2   15.84    0.54 
   1 -20  -2   15.71    0.54 
   1 -20  -2   15.90    0.52 
   1  20  -2   15.65    0.57 
  -1  20   2   15.16    0.53 
  -1  20   2   15.33    0.42 
  -1  20   2   16.26    0.62 
   1  20  -2   15.40    0.45 
   0 -20  -2   86.19    1.58 
   0 -20  -2   87.48    1.93 
   0 -20  -2   91.27    1.93 
   0 -20   2   88.96    2.00 
   0 -20  -2   87.61    1.91 
   0 -20   2   85.86    1.87 
   0 -20   2   85.04    1.77 
   0 -20   2   86.67    2.04 
   0 -20   2   85.76    1.65 
   0  20   2   88.50    2.09 
   0  20  -2   85.19    1.80 
  -1 -20  -2    7.49    0.24 
  -1 -20  -2    7.26    0.33 
  -1 -20  -2    7.59    0.25 
   1 -20   2    7.53    0.37 
  -1 -20  -2    7.57    0.35 
   1 -20   2    7.43    0.41 
  -1 -20  -2    7.41    0.26 
   1 -20   2    7.19    0.27 
   1 -20   2    7.18    0.30 
   1 -20   2    7.35    0.36 
  -1  20  -2    7.36    0.43 
  -1  20  -2    7.32    0.23 
   1  20   2    7.55    0.36 
   1  20   2    6.96    0.37 
   1  20   2    7.54    0.41 
   1  20   2    7.02    0.27 
   2 -20   2   40.98    1.02 
   2 -20   2   40.56    1.09 
   2 -20   2   41.09    0.89 
   2 -20   2   39.97    0.95 
  -2 -20  -2   40.56    0.97 
   2  20   2   40.23    1.03 
   2  20   2   41.17    1.10 
   2  20   2   41.35    0.91 
  -2  20  -2   40.51    1.01 
   2  20   2   41.35    0.85 
   2  20   2   40.63    1.06 
  -3 -20  -2    0.75    0.14 
   3 -20   2    0.86    0.17 
  -3 -20  -2    0.94    0.15 
   3 -20   2    1.17    0.18 
   3 -20   2    0.58    0.20 
   3 -20   2    0.88    0.20 
   3  20   2    0.74    0.18 
   3  20   2    0.94    0.17 
   3  20   2    0.93    0.21 
   3  20   2    0.85    0.15 
   3  20   2    1.08    0.19 
  -3  20  -2    1.08    0.19 
   4 -20   2   66.88    1.71 
  -4 -20  -2   67.60    1.33 
   4 -20   2   68.47    1.58 
   4 -20   2   69.08    1.40 
   4 -20   2   68.64    1.77 
   4 -20   2   68.19    1.58 
  -4  20  -2   67.19    1.55 
   4  20   2   67.83    1.38 
   4  20   2   68.14    1.61 
   4  20   2   67.22    1.54 
   4  20   2   66.90    1.63 
  -4  20  -2   72.33    1.79 
  -4  20  -2   70.58    1.61 
   5 -20   2    0.01    0.21 
   5 -20   2    0.08    0.20 
   5 -20   2    0.13    0.20 
   5 -20   2    0.04    0.18 
   5  20   2    0.19    0.19 
  -5  20  -2    0.41    0.19 
   5  20   2    0.20    0.21 
  -5  20  -2    0.34    0.21 
   5  20   2    0.30    0.20 
   5  20   2    0.03    0.18 
   6 -20   2   48.01    1.12 
  -6 -20  -2   43.76    1.02 
   6 -20   2   45.75    1.37 
   6 -20   2   47.70    1.25 
  -6  20  -2   46.38    1.19 
   6  20   2   44.95    1.21 
   6  20   2   46.14    1.12 
   6  20   2   45.54    1.26 
   6  20   2   44.93    1.22 
   7 -20   2   -0.16    0.30 
   7 -20   2    1.14    0.31 
   7  20   2    0.18    0.28 
   7  20   2    0.61    0.31 
   7  20   2    0.88    0.34 
   7 -21  -2    3.55    0.39 
   7 -21  -2    4.06    0.56 
   7  21  -2    3.74    0.41 
   7  21  -2    4.57    0.57 
   7  21  -2    2.85    0.39 
   6 -21  -2   58.40    1.47 
   6 -21  -2   58.48    1.63 
  -6  21   2   56.91    1.49 
   6  21  -2   59.33    1.59 
   6  21  -2   58.71    1.53 
   6  21  -2   58.74    1.36 
  -6  21   2   59.39    1.46 
   5 -21  -2    1.05    0.25 
   5 -21  -2    1.32    0.20 
  -5 -21   2    1.05    0.21 
   5 -21  -2    1.42    0.24 
   5 -21  -2    1.38    0.27 
  -5  21   2    1.10    0.25 
   5  21  -2    1.07    0.25 
   5  21  -2    1.59    0.29 
  -5  21   2    1.08    0.23 
   5  21  -2    1.64    0.27 
   4 -21  -2  147.99    2.64 
   4 -21  -2  146.11    3.33 
  -4 -21   2  154.46    3.12 
  -4 -21   2  148.65    3.10 
   4 -21  -2  146.52    3.08 
   4  21  -2  148.49    2.75 
  -4  21   2  144.85    3.10 
  -4  21   2  141.86    3.40 
  -4  21   2  146.62    3.04 
   4  21  -2  144.35    3.08 
   4  21  -2  145.16    3.31 
   3 -21  -2    1.24    0.18 
  -3 -21   2    1.25    0.18 
  -3 -21   2    1.19    0.15 
   3 -21  -2    0.83    0.18 
  -3 -21   2    1.09    0.17 
   3  21  -2    0.92    0.21 
  -3  21   2    0.65    0.19 
  -3  21   2    1.42    0.21 
   3  21  -2    1.20    0.20 
  -3  21   2    1.33    0.25 
   3  21  -2    1.25    0.22 
   2 -21  -2   81.60    1.68 
   2 -21  -2   79.89    1.84 
  -2 -21   2   77.31    1.53 
   2 -21  -2   80.27    1.47 
  -2 -21   2   80.99    1.83 
  -2 -21   2   79.96    1.67 
  -2 -21   2   80.95    1.80 
  -2 -21   2   79.45    1.76 
   2 -21  -2   81.28    1.87 
  -2  21   2   77.90    1.98 
  -2  21   2   77.58    1.75 
  -2  21   2   78.91    1.70 
   2  21  -2   77.98    1.76 
   2  21  -2   79.50    1.90 
   2  21  -2   75.81    1.55 
  -1 -21   2   33.25    0.91 
   1 -21  -2   32.98    0.85 
  -1 -21   2   34.02    0.80 
  -1 -21   2   31.85    0.74 
   1 -21  -2   32.16    0.68 
   1 -21  -2   33.00    0.89 
  -1 -21   2   32.72    0.87 
   1 -21  -2   32.91    0.87 
  -1 -21   2   32.00    0.86 
  -1  21   2   31.68    0.99 
   1  21  -2   31.23    0.75 
  -1  21   2   32.15    0.74 
   1  21  -2   33.06    0.94 
   1  21  -2   32.83    0.88 
  -1  21   2   31.93    0.87 
   0 -21  -2   52.20    1.02 
   0 -21  -2   52.78    1.22 
   0 -21   2   51.93    1.08 
   0 -21   2   52.21    1.10 
   0 -21   2   54.54    1.25 
   0 -21   2   54.03    1.31 
   0 -21  -2   53.75    1.26 
   0 -21  -2   54.59    1.23 
   0 -21   2   54.07    1.35 
   0  21   2   51.03    1.25 
   0  21  -2   51.23    1.35 
   0  21  -2   51.77    1.24 
   0  21  -2   52.39    1.13 
   0  21   2   51.93    1.40 
  -1 -21  -2    4.10    0.28 
   1 -21   2    3.52    0.25 
  -1 -21  -2    3.94    0.21 
   1 -21   2    3.97    0.35 
   1 -21   2    4.84    0.32 
   1 -21   2    4.56    0.31 
   1 -21   2    3.88    0.22 
  -1 -21  -2    4.29    0.20 
   1  21   2    4.09    0.31 
  -1  21  -2    4.06    0.31 
   1  21   2    4.79    0.38 
  -1  21  -2    4.11    0.37 
   1  21   2    4.20    0.23 
   1  21   2    4.16    0.32 
   2 -21   2   49.99    1.21 
   2 -21   2   50.18    1.05 
   2 -21   2   48.70    1.33 
   2 -21   2   48.60    1.13 
  -2 -21  -2   50.53    1.16 
  -2 -21  -2   49.85    0.99 
   2  21   2   50.09    1.26 
   2  21   2   50.45    1.08 
   2  21   2   49.53    1.01 
   2  21   2   49.30    1.30 
  -2  21  -2   50.30    1.19 
   2  21   2   49.90    1.22 
   3 -21   2   28.99    0.82 
  -3 -21  -2   27.87    0.65 
   3 -21   2   28.17    0.92 
  -3 -21  -2   29.58    0.73 
   3 -21   2   27.75    0.89 
   3 -21   2   29.36    0.71 
   3 -21   2   28.08    0.76 
   3  21   2   28.34    0.82 
   3  21   2   27.83    0.84 
   3  21   2   28.20    0.72 
  -3  21  -2   28.57    0.80 
   3  21   2   27.81    0.69 
   3  21   2   28.16    0.85 
   4 -21   2    8.75    0.51 
   4 -21   2    8.10    0.47 
   4 -21   2    7.99    0.41 
  -4 -21  -2    8.04    0.34 
   4 -21   2    8.02    0.46 
  -4  21  -2    7.36    0.42 
  -4  21  -2    7.99    0.43 
   4  21   2    7.80    0.38 
   4  21   2    7.38    0.42 
   4  21   2    7.54    0.37 
   4  21   2    7.64    0.46 
  -4  21  -2    7.72    0.53 
   5 -21   2   13.36    0.66 
   5 -21   2   13.97    0.57 
   5 -21   2   13.49    0.52 
   5  21   2   14.40    0.64 
   5  21   2   12.80    0.53 
   5  21   2   13.59    0.58 
  -5  21  -2   13.57    0.55 
   5  21   2   14.04    0.54 
  -5  21  -2   12.75    0.60 
   6 -21   2    5.14    0.47 
  -6 -21  -2    3.93    0.38 
   6 -21   2    5.68    0.53 
   6  21   2    4.94    0.49 
   6  21   2    5.53    0.52 
  -6  21  -2    4.43    0.43 
   6  21   2    4.96    0.45 
   7 -21   2   11.49    0.74 
   7 -21   2   12.28    0.69 
   7  21   2   12.88    0.68 
   7  21   2   11.99    0.72 
   7  21   2   12.21    0.67 
   7 -22  -2   23.02    0.89 
   7 -22  -2   24.02    0.99 
   7  22  -2   24.22    0.89 
   7  22  -2   23.10    0.98 
   7  22  -2   23.87    0.96 
   6 -22  -2    2.42    0.33 
   6 -22  -2    3.00    0.39 
   6  22  -2    2.44    0.34 
   6  22  -2    2.91    0.37 
   6  22  -2    2.65    0.38 
  -6  22   2    2.76    0.33 
   5 -22  -2   62.01    1.63 
   5 -22  -2   60.38    1.23 
   5 -22  -2   59.80    1.46 
  -5  22   2   59.20    1.46 
  -5  22   2   59.61    1.48 
   5  22  -2   59.44    1.35 
   5  22  -2   59.87    1.59 
   5  22  -2   60.66    1.53 
   4 -22  -2    5.93    0.43 
   4 -22  -2    5.60    0.32 
  -4 -22   2    5.91    0.28 
  -4 -22   2    6.13    0.27 
  -4 -22   2    5.56    0.34 
   4 -22  -2    5.95    0.37 
   4 -22  -2    6.34    0.46 
  -4  22   2    5.80    0.39 
   4  22  -2    6.20    0.44 
   4  22  -2    6.28    0.44 
  -4  22   2    4.44    0.39 
   4  22  -2    5.60    0.39 
   3 -22  -2   57.01    1.46 
   3 -22  -2   54.40    1.42 
   3 -22  -2   56.62    1.12 
  -3 -22   2   58.53    1.32 
   3 -22  -2   57.01    1.30 
  -3 -22   2   58.25    1.35 
  -3  22   2   56.32    1.37 
   3  22  -2   56.44    1.39 
  -3  22   2   57.02    1.32 
   3  22  -2   55.86    1.22 
   3  22  -2   57.72    1.48 
  -3  22   2   58.00    1.58 
   2 -22  -2   19.88    0.66 
   2 -22  -2   19.87    0.53 
   2 -22  -2   19.49    0.50 
  -2 -22   2   19.79    0.62 
  -2 -22   2   19.57    0.51 
  -2 -22   2   20.24    0.59 
   2 -22  -2   19.33    0.62 
  -2 -22   2   18.71    0.63 
  -2 -22   2   19.09    0.54 
  -2  22   2   18.97    0.64 
   2  22  -2   18.65    0.65 
  -2  22   2   19.26    0.55 
   2  22  -2   19.38    0.69 
  -2  22   2   19.27    0.76 
   2  22  -2   18.48    0.59 
   1 -22  -2   49.67    0.98 
  -1 -22   2   48.25    1.04 
   1 -22  -2   49.71    1.21 
  -1 -22   2   51.40    1.15 
  -1 -22   2   49.83    1.23 
  -1 -22   2   50.85    1.27 
   1 -22  -2   51.25    1.23 
  -1 -22   2   48.90    1.20 
   1 -22  -2   50.13    1.24 
   1  22  -2   51.34    1.32 
  -1  22   2   49.71    1.22 
  -1  22   2   48.72    1.07 
  -1  22   2   50.69    1.39 
   1  22  -2   47.74    1.09 
   1  22  -2   49.36    1.21 
   1  22  -2   48.43    1.06 
   0 -22   2    1.36    0.14 
   0 -22   2    1.59    0.21 
   0 -22   2    1.30    0.22 
   0 -22   2    1.11    0.18 
   0 -22  -2    1.52    0.22 
   0 -22  -2    1.77    0.22 
   0 -22   2    1.89    0.26 
   0 -22  -2    1.41    0.16 
   0 -22  -2    1.34    0.15 
   0  22   2    1.69    0.28 
   0  22  -2    1.22    0.20 
   0  22  -2    1.54    0.22 
   0  22   2    1.41    0.20 
   0  22  -2    1.71    0.14 
   1 -22   2   30.43    0.73 
  -1 -22  -2   31.12    0.82 
  -1 -22  -2   30.10    0.68 
   1 -22   2   31.46    0.90 
   1 -22   2   32.37    0.87 
  -1 -22  -2   31.28    0.71 
   1 -22   2   30.54    0.73
[truncated: 1,273,026 more chars]
